# Supplementary material for: Mapping PP1c and Its Inhibitor 2 Interactomes Reveals Conserved and Specific Networks in Asexual and Sexual Stages of Plasmodium
Source: MDPI journal article supplement (doi:10.3390/ijms23031069), 2022-01-19
Supplement: s1 [file s1]

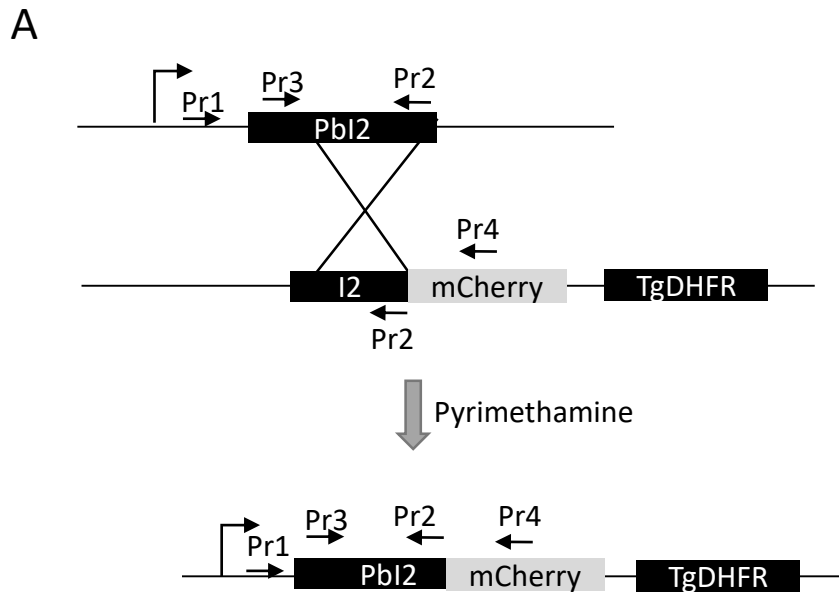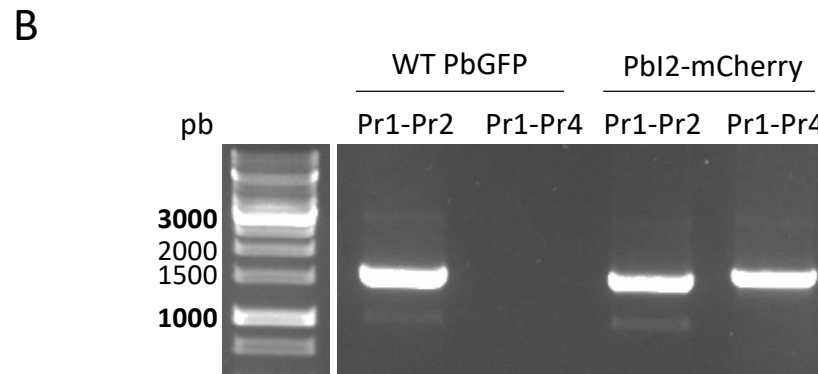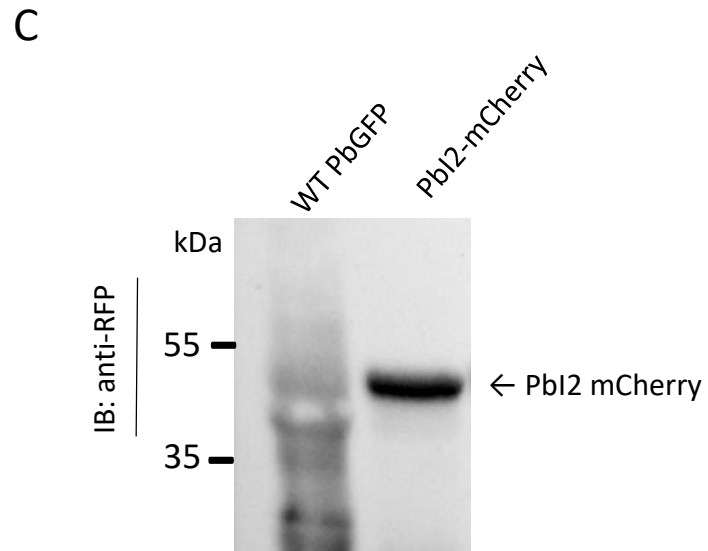

**Figure S1: Generation of Pbl2-mCherry line.**

**A)** Schematic representation of the C-ter mCherry tagging of Pbl2 using single homologous recombination. Are represented the plasmid with the mCherry tag and the TgDHFR selection marker. Transgenic parasites were selected using pyrimethamine. The position of the primers (Supplementary Table S3) used for diagnostic PCR are indicated by arrows.

**B)** Diagnostic PCR of Pbl2-mCherry (lanes 3-4) compared to WT PbGFP parasites (lanes 1-2). Lanes 1 and 3: control PCR: amplification of a portion of Pbl2 (Pr1 and Pr2). Lanes 2 and 4 : 5' integration (Pr1-Pr4).

**C)** Western-blot analysis performed on Pbl2-mCherry and WT PbGFP ANKA extracts using a monoclonal anti-RFP antibody. Lane 1 corresponds to WT PbGFP, used as negative control and lane 2 corresponds to Pbl2-mCherry at the expected size.
