# Supplementary material for: Mapping PP1c and Its Inhibitor 2 Interactomes Reveals Conserved and Specific Networks in Asexual and Sexual Stages of Plasmodium
Source: Int J Mol Sci. 2022 Jan 19;23(3):1069. doi: 10.3390/ijms23031069 (PMC8835298; doi:10.3390/ijms23031069)
Supplement: Supplementary file 1 [file ijms-23-01069-s001.zip]

Archive with 4 entries (4 files):
- Supp Table S1_analyse interactome PP1.xlsx
- Supp Table S2_analyse interactome PP1 GO analysis.xlsx
- Supp Table S3_ list of primers.xlsx
- Supplementary FigS1.pdf
