# Supplementary material for: Mapping PP1c and Its Inhibitor 2 Interactomes Reveals Conserved and Specific Networks in Asexual and Sexual Stages of Plasmodium
Source: Int J Mol Sci. 2022 Jan 19;23(3):1069. doi: 10.3390/ijms23031069 (PMC8835298; doi:10.3390/ijms23031069)
Supplement: Supplementary file 1 [file ijms-23-01069-s001.zip › Supp Table S1_analyse interactome PP1.xlsx]

## Sheet: 1. PP1 and I2 interactome
Table S1. Sheet 1. Identified proteins after PbPP1c-mCherry and PbI2-mcherry immunoprecipitation in P. berghei schizonts and gametocytes. We report the detailed list of proteins quantified in five biological replicates of immunoprecipitation with anti-RFP antibodies on PbWT schizonts and gametocytes as negative control ( S_WT, G-WT), on schizonts and gametocytes expressing PbPP1c-mCherry (S_PP1, …
G_I2-1	G_I2-2	G_I2-3	G_I2-4	G_I2-5	G_PP1-1	G_PP1-2	G_PP1-3	G_PP1-4	G_PP1-5	G_WT1	G_WT2	G_WT3	G_WT4	G_WT5	S_I2-1	S_I2-2	S_I2-3	S_I2-4	S_I2-5	S_PP1-1	S_PP1-2	S_PP1-3	S_PP1-4	S_PP1-5	S_WT1	S_WT2	S_WT3	S_WT4	S_WT5	T-test G_I2_G_WT	T-test G_PP1_G_WT	T-test S_I2_S_WT	T-test S_PP1_S_WT	N: Student's T-test Difference G_I2_G_WT	N: Student's T-test Difference G_PP1_G_WT	N: Student's T-test Difference S_I2_S_WT	N: Student's T-test Difference S_PP1_S_WT	C: Student's T-test significant	Portein Name	T: Majority protein IDs	N: Razor + unique peptides	N: Unique peptides	N: Sequence coverage [%]	N: Unique + razor sequence coverage [%]	N: Unique sequence coverage [%]	N: Mol. weight [kDa]	N: Q-value	N: Score	N: Intensity
37.5446	37.7569	36.9623	38.0404	36.5238	36.7155	37.6225	37.1089	36.7484	37.1851	22.965	22.4749	22.5769	22.7168	22.2094	34.2138	35.4366	35.1086	35.277	35.151	35.0325	35.0788	35.2996	35.1824	35.2278	NaN	25.6033	NaN	20.4561	NaN	+	+	+	+	14.777	14.4875	12.1557	12.2825	G_I2_G_WT;G_PP1_G_WT;S_I2_S_WT;S_PP1_S_WT	protein phosphatase inhibitor 2, putative	PBANKA_1218500.1-p1	22	22	85.4	85.4	85.4	16.664	0	323.31	1577400000000
NaN	NaN	NaN	NaN	NaN	34.2612	34.1448	34.1533	33.988	34.2541	NaN	NaN	30.598	NaN	NaN	NaN	NaN	NaN	NaN	NaN	NaN	33.9054	34.7871	34.3285	33.9939	NaN	NaN	NaN	NaN	NaN		+		+	-0.525196	10.9637	0	9.59627	G_PP1_G_WT;S_PP1_S_WT	conserved Plasmodium protein, unknown function	PBANKA_0107600.1-p1	10	10	2.3	2.3	2.3	637.24	0	13.06	341490000000
27.6986	28.238	26.7944	28.6432	27.9773	31.7065	31.9717	31.726	31.6278	31.763	20.641	21.8744	20.9525	21.2957	21.1082	23.3896	23.7353	24.0164	25.694	24.9965	29.9567	29.6041	30.9723	29.8309	30.0822	21.7923	NaN	21.023	20.8849	20.1659	+	+	+	+	6.69594	10.5846	3.45563	9.17853	G_I2_G_WT;G_PP1_G_WT;S_I2_S_WT;S_PP1_S_WT	conserved Plasmodium protein, unknown function	PBANKA_0621300.1-p1	66	66	35.8	35.8	35.8	205.13	0	323.31	28219000000
37.9656	38.103	37.387	38.5534	37.3066	37.8972	38.2558	38.2068	37.8611	38.2702	28.1689	27.9103	27.798	27.6691	27.5376	34.7132	35.8733	35.3731	35.7221	35.6429	36.8002	37.1812	37.232	37.1905	37.3675	26.3594	26.3048	26.2741	26.3133	26.8116	+	+	+	+	10.0463	10.2814	9.05228	10.7416	G_I2_G_WT;G_PP1_G_WT;S_I2_S_WT;S_PP1_S_WT	serine/threonine protein phosphatase PP1	PBANKA_1028300.1-p1	31	23	80.3	80.3	60.9	34.963	0	323.31	3198900000000
25.4455	25.9305	23.6422	25.497	25.7428	35.9038	36.4259	36.2692	35.9945	36.2072	26.3435	26.2883	26.4175	26.207	26.1629	23.3551	23.8288	24.1602	20.9174	25.2297	34.8204	35.471	35.5851	35.444	35.5621	19.8644	22.4496	23.271	23.1992	24.9236	+	+		+	-1.03222	9.87628	0.756689	12.6349	G_I2_G_WT;G_PP1_G_WT;S_PP1_S_WT	leucine-rich repeat protein	PBANKA_0516600.1-p1	36	36	85.5	85.5	85.5	36.735	0	323.31	693780000000
NaN	NaN	NaN	NaN	NaN	31.2143	30.9953	31.187	30.7491	31.0136	NaN	NaN	NaN	NaN	NaN	NaN	NaN	NaN	NaN	NaN	29.3671	30.2048	NaN	30.6576	31.6016	NaN	NaN	31.2313	NaN	NaN		+		+	0	9.50126	-1.23543	5.00533	G_PP1_G_WT;S_PP1_S_WT	acid phosphatase, putative	PBANKA_1014400.1-p1	5	5	4	4	4	243.23	0	6.991	41134000000
NaN	NaN	NaN	NaN	NaN	30.5925	31.6725	30.8951	29.9056	30.8766	23.2585	NaN	19.8421	20.4931	NaN	NaN	NaN	NaN	NaN	NaN	28.6799	29.5933	29.9673	29.9906	30.0804	20.3731	NaN	20.1066	20.3902	20.6861	+	+	+	+	1.74627	9.3539	1.52699	9.19584	G_I2_G_WT;G_PP1_G_WT;S_I2_S_WT;S_PP1_S_WT	conserved protein, unknown function	PBANKA_0601600.1-p1	35	35	16.5	16.5	16.5	201.93	0	323.31	16684000000
NaN	24.5041	NaN	NaN	NaN	29.1829	29.617	29.7183	28.8876	29.9567	NaN	NaN	NaN	18.4113	NaN	NaN	24.3533	NaN	23.1619	23.8138	30.4966	31.5172	31.9405	31.434	31.2551	NaN	NaN	NaN	NaN	19.2435	+	+		+	1.41979	8.29166	1.4887	9.60997	G_I2_G_WT;G_PP1_G_WT;S_PP1_S_WT	regulator of chromosome condensation, putative	PBANKA_0820800.1-p1	43	43	22	22	22	292.19	0	323.31	17661000000
NaN	NaN	NaN	NaN	NaN	30.1625	30.3173	30.6361	30.1159	30.2509	NaN	NaN	NaN	NaN	NaN	NaN	NaN	NaN	NaN	NaN	28.2544	29.1466	29.1413	29.0326	29.2179	NaN	NaN	NaN	NaN	NaN		+		+	0	8.14653	0	7.1088	G_PP1_G_WT;S_PP1_S_WT	protein phosphatase inhibitor 3, putative	PBANKA_0515500.1-p1	9	9	55.7	55.7	55.7	13.066	0	323.31	10685000000
24.9685	21.1914	22.7461	22.0069	20.7433	29.1394	30.0514	29.125	29.4341	29.4006	20.7459	21.948	22.2827	21.6363	20.157	20.7831	21.0193	21.253	20.9018	21.7285	28.715	29.0022	29.7812	28.947	29.9821	21.7794	21.1897	21.927	22.2174	22.2625		+		+	0.977273	8.07615	-0.73807	7.41028	G_PP1_G_WT;S_PP1_S_WT	pre-mRNA-processing-splicing factor 8, putative	PBANKA_1003100.1-p1	67	56	29.8	29.8	25.7	344.37	0	323.31	7137200000
NaN	NaN	NaN	NaN	NaN	29.4114	29.9148	29.6075	29.5237	29.5642	NaN	NaN	NaN	NaN	NaN	NaN	NaN	NaN	NaN	NaN	29.4279	29.9151	30.2438	29.9307	30.0377	NaN	NaN	NaN	NaN	NaN		+		+	0	7.33223	0	7.79915	G_PP1_G_WT;S_PP1_S_WT	conserved Plasmodium protein, unknown function	PBANKA_0515400.1-p1	30	30	44.1	44.1	44.1	77.377	0	323.31	10184000000
24.4174	NaN	NaN	NaN	NaN	28.1015	28.936	28.2916	27.7707	28.6522	NaN	NaN	NaN	NaN	NaN	NaN	NaN	NaN	NaN	NaN	28.7761	29.0559	29.4215	28.8512	28.9944	NaN	NaN	NaN	NaN	NaN	+	+		+	1.29809	6.71121	0	6.91626	G_I2_G_WT;G_PP1_G_WT;S_PP1_S_WT	conserved Plasmodium protein, unknown function	PBANKA_0310800.1-p1	25	25	30.3	30.3	30.3	97.344	0	323.31	4685100000
28.8493	29.0349	27.9212	28.982	28.0058	26.8808	28.3513	28.0835	27.2988	27.6303	20.4832	NaN	20.6248	NaN	NaN	24.4024	25.8553	25.495	25.8491	25.59	25.279	25.011	26.3417	25.2045	24.6112	NaN	NaN	21.0457	21.8942	22.2906	+	+	+	+	7.00137	6.09168	3.55892	3.41003	G_I2_G_WT;G_PP1_G_WT;S_I2_S_WT;S_PP1_S_WT	peptidyl-prolyl cis-trans isomerase, putative	PBANKA_1109800.1-p1	14	14	23.1	23.1	23.1	85.451	0	49.676	2880800000
NaN	NaN	NaN	NaN	NaN	26.916	27.5196	27.1555	26.7934	27.2612	NaN	NaN	NaN	NaN	NaN	NaN	NaN	NaN	NaN	NaN	27.202	27.7734	27.9586	27.6186	27.7593	NaN	NaN	NaN	NaN	NaN		+		+	0	5.51816	0	5.34028	G_PP1_G_WT;S_PP1_S_WT	conserved Plasmodium protein, unknown function	PBANKA_0710500.1-p1	11	11	24.7	24.7	24.7	67.544	0	323.31	1894700000
NaN	NaN	NaN	NaN	NaN	26.4195	28.0088	27.3031	27.1374	27.5973	NaN	NaN	NaN	NaN	NaN	25.308	NaN	26.0924	25.8869	25.2763	26.0568	26.1869	26.8195	NaN	26.6457	NaN	NaN	NaN	NaN	NaN		+	+	+	0	5.27153	3.28829	3.41286	G_PP1_G_WT;S_I2_S_WT;S_PP1_S_WT	conserved Plasmodium protein, unknown function	PBANKA_1441200.1-p1	2	2	2.5	2.5	2.5	94.91	0.00050633	3.334	2344500000
NaN	NaN	NaN	NaN	NaN	NaN	NaN	NaN	NaN	NaN	NaN	NaN	NaN	NaN	NaN	NaN	NaN	NaN	NaN	NaN	26.4825	27.1425	27.306	26.7459	27.2803	NaN	NaN	NaN	NaN	NaN				+	0	0	0	4.78337	S_PP1_S_WT	nucleolar protein Nop52, putative	PBANKA_0831900.1-p1	12	12	24.2	24.2	24.2	65.509	0	108.14	638980000
NaN	NaN	NaN	NaN	NaN	26.7259	27.8254	26.6726	26.8851	26.6711	22.3259	21.4166	22.1308	22.0838	NaN	NaN	NaN	NaN	NaN	NaN	25.3088	26.569	27.6048	26.2762	27.5563	21.9538	NaN	NaN	22.4173	22.9905		+		+	0.505632	5.0321	-0.639093	4.37107	G_PP1_G_WT;S_PP1_S_WT	pre-mRNA-splicing helicase BRR2, putative	PBANKA_0522900.1-p1	30	30	16.7	16.7	16.7	288.18	0	323.31	1418400000
NaN	NaN	NaN	NaN	NaN	26.7674	27.0987	26.9594	27.1478	27.0404	NaN	NaN	NaN	NaN	NaN	NaN	NaN	NaN	NaN	NaN	NaN	NaN	27.1705	27.0173	27.1203	NaN	NaN	NaN	NaN	NaN		+		+	0	4.88064	0	3.3051	G_PP1_G_WT;S_PP1_S_WT	conserved Plasmodium protein, unknown function	PBANKA_0939700.1-p1	5	5	9.4	9.4	9.4	76.732	0	4.9162	1393100000
NaN	NaN	NaN	NaN	NaN	25.8011	28.2603	27.1023	26.4499	27.1362	22.5316	21.4771	22.2676	21.4691	NaN	NaN	NaN	24.3701	NaN	NaN	27.5936	28.0707	28.9986	27.9697	27.584	22.3527	22.8526	22.5276	23.9418	23.9077		+		+	0.675339	4.86893	-0.60261	4.92681	G_PP1_G_WT;S_PP1_S_WT	DNA-directed RNA polymerase II subunit RPB1, putative	PBANKA_0807000.1-p1	34	34	18.8	18.8	18.8	261.05	0	323.31	2481100000
NaN	NaN	NaN	NaN	NaN	NaN	NaN	NaN	NaN	NaN	NaN	NaN	NaN	NaN	NaN	NaN	NaN	NaN	NaN	NaN	25.9202	26.6645	26.3342	26.0448	25.9997	NaN	NaN	NaN	NaN	NaN				+	0	0	0	4.13313	S_PP1_S_WT	40S ribosomal protein S20e, putative	PBANKA_1201900.1-p1	2	2	17.8	17.8	17.8	13.513	0	4.9723	1046800000
24.9412	25.0819	24.517	25.5329	24.3138	26.1567	26.5631	26.236	26.2568	26.5522	NaN	NaN	NaN	NaN	NaN	NaN	NaN	NaN	NaN	NaN	25.4261	25.872	26.4713	25.9668	25.7587	NaN	NaN	NaN	NaN	NaN	+	+		+	3.18624	4.66188	0	4.04253	G_I2_G_WT;G_PP1_G_WT;S_PP1_S_WT	conserved Plasmodium protein, unknown function	PBANKA_0311200.1-p1	9	9	15.7	15.7	15.7	65.768	0	42.823	939750000
NaN	NaN	NaN	NaN	NaN	27.9775	29.0245	27.8635	27.6632	27.7819	24.5071	24.3357	23.0949	23.5666	23.1755	NaN	NaN	NaN	NaN	NaN	27.3506	28.1061	28.9033	27.1357	28.4023	23.29	NaN	22.9422	NaN	22.7724	+	+		+	-1.20287	4.32613	0.423301	5.71244	G_I2_G_WT;G_PP1_G_WT;S_PP1_S_WT	U5 small nuclear ribonucleoprotein component, putative	PBANKA_1202200.1-p1	35	35	33.8	33.8	33.8	138.14	0	291.74	3283900000
NaN	NaN	NaN	NaN	NaN	NaN	NaN	NaN	NaN	NaN	NaN	NaN	NaN	NaN	NaN	NaN	NaN	NaN	NaN	NaN	25.1124	25.4631	25.9001	25.0611	25.6842	NaN	NaN	NaN	NaN	NaN				+	0	0	0	3.80128	S_PP1_S_WT	ribosome production factor 1, putative	PBANKA_0822700.1-p1	7	7	24	24	24	39.707	0	24.643	210730000
NaN	NaN	NaN	NaN	NaN	25.1303	26.1525	25.5443	25.3641	25.5412	NaN	NaN	NaN	NaN	NaN	NaN	NaN	NaN	NaN	NaN	25.5157	25.581	26.1368	25.3101	25.5847	NaN	NaN	NaN	NaN	NaN		+		+	0	4.22373	0	4.2508	G_PP1_G_WT;S_PP1_S_WT	U5 small nuclear ribonucleoprotein 40 kDa protein, putative	PBANKA_0707800.1-p1	7	7	19.3	19.3	19.3	36.809	0	109.24	573070000
NaN	NaN	NaN	NaN	NaN	28.4574	28.0245	28.2476	28.5754	27.9483	23.9821	24.231	24.9871	24.4296	23.5544	NaN	NaN	NaN	NaN	NaN	21.4449	20.8451	23.4157	21.651	21.2879	NaN	NaN	NaN	NaN	21.3472	+	+			-1.75608	4.01381	0.714471	-0.444455	G_I2_G_WT;G_PP1_G_WT	dynein heavy chain, putative	PBANKA_0214000.1-p1	61	59	14.3	14.3	13.9	587.78	0	320.47	2038200000
NaN	NaN	NaN	NaN	NaN	NaN	NaN	NaN	NaN	NaN	NaN	NaN	NaN	NaN	NaN	NaN	NaN	NaN	NaN	NaN	23.8777	25.7102	26.6232	26.4949	26.4126	NaN	22.0895	NaN	22.709	22.366				+	0	0	-0.0636208	3.68384	S_PP1_S_WT	AP2 domain transcription factor, putative	PBANKA_0112100.1-p1	18	18	9.8	9.8	9.8	300.75	0	85.444	335020000
NaN	NaN	NaN	NaN	NaN	25.7257	26.18	26.7565	26.0262	26.51	NaN	NaN	NaN	23.3597	NaN	NaN	NaN	NaN	NaN	NaN	25.4393	25.0112	25.7204	25.2755	25.2588	NaN	NaN	NaN	NaN	NaN		+		+	0.706913	3.95728	0	3.21782	G_PP1_G_WT;S_PP1_S_WT	conserved Plasmodium protein, unknown function	PBANKA_1131500.1-p1	13	13	22	22	22	66.814	0	275.26	726770000
NaN	NaN	NaN	NaN	NaN	26.9066	26.9584	27.1726	26.7764	26.5853	23.8058	22.533	24.2954	23.9815	21.9685	NaN	NaN	NaN	NaN	NaN	NaN	21.7227	23.6373	22.4486	21.4903	NaN	NaN	NaN	NaN	NaN		+			-0.705436	3.56302	0	0.201251	G_PP1_G_WT	P-loop containing nucleoside triphosphate hydrolase, putative	PBANKA_0202500.1-p1	21	21	25.2	25.2	25.2	123.91	0	105.19	817010000
NaN	NaN	NaN	NaN	NaN	NaN	NaN	23.0974	NaN	22.6284	22.5199	22.1934	22.4703	22.6332	NaN	NaN	NaN	NaN	NaN	NaN	25.9267	25.801	26.3084	25.9506	26.2165	22.7475	NaN	NaN	NaN	23.0326				+	0.229914	-0.364069	0.293013	3.61629	S_PP1_S_WT	60S ribosomal protein L18-2, putative	PBANKA_1354500.1-p1	2	2	12.8	12.8	12.8	21.523	0	62.857	402390000
21.8664	24.3936	21.7087	22.019	23.2015	29.314	29.2794	29.4527	29.2038	29.3518	25.9925	25.8782	25.9767	26.2789	25.6161	NaN	NaN	NaN	NaN	NaN	25.4319	25.9906	26.9585	26.1539	25.8513	22.3536	21.6399	21.6355	22.4339	23.9635	+	+		+	-3.31066	3.37186	-0.164937	3.67196	G_I2_G_WT;G_PP1_G_WT;S_PP1_S_WT	NAD(P)H-dependent glutamate synthase, putative	PBANKA_1009500.1-p1	69	69	30.5	30.5	30.5	336.29	0	323.31	4528900000
NaN	NaN	NaN	NaN	23.4487	NaN	NaN	NaN	NaN	NaN	NaN	NaN	NaN	NaN	NaN	NaN	23.2365	NaN	24.1341	22.8212	25.1852	25.8146	26.8695	26.4935	26.666	23.9578	NaN	24.087	NaN	NaN				+	0.843429	0	0.394338	3.49658	S_PP1_S_WT	40S ribosomal protein S23, putative	PBANKA_0405300.1-p1	2	2	13.8	13.8	13.8	16.116	0	34.309	652830000
NaN	NaN	NaN	NaN	NaN	23.6443	24.0612	25.2149	24.9505	24.4763	23.9008	23.8605	23.6522	23.78	23.7521	NaN	NaN	NaN	NaN	NaN	26.0112	27.3855	27.8761	27.6118	27.7308	23.9335	NaN	24.1529	24.2768	24.2058	+			+	-1.16692	0.680347	-1.34479	3.48634	G_I2_G_WT;S_PP1_S_WT	60S ribosomal protein L36, putative	PBANKA_0937700.1-p1	4	4	34.5	34.5	34.5	12.726	0	33.299	1035200000
NaN	NaN	NaN	NaN	NaN	26.8093	26.1979	26.3726	26.4042	26.1875	21.8722	23.3753	23.4197	24.1592	22.3634	NaN	NaN	NaN	NaN	NaN	NaN	NaN	23.0878	NaN	NaN	NaN	NaN	NaN	NaN	NaN		+			-0.132431	3.35635	0	0.441933	G_PP1_G_WT	conserved Plasmodium protein, unknown function	PBANKA_0509700.1-p1	30	30	8.2	8.2	8.2	566.52	0	100.4	590040000
24.9287	25.0694	24.6684	24.853	24.4415	25.6182	26.5581	25.8576	26.1785	25.6839	22.2982	22.54	22.972	23.2647	22.2534	NaN	NaN	NaN	23.3102	NaN	NaN	NaN	22.8534	NaN	NaN	NaN	NaN	NaN	NaN	NaN	+	+			2.12657	3.31364	0.177186	0.69794	G_I2_G_WT;G_PP1_G_WT	conserved Plasmodium protein, unknown function	PBANKA_1420100.1-p1	11	11	14.8	14.8	14.8	118.72	0	101.23	551480000
NaN	24.6143	NaN	NaN	NaN	25.7851	27.598	26.3615	26.5296	26.8009	23.5638	23.2182	23.7675	23.2938	22.8026	22.351	NaN	23.9634	24.3774	NaN	26.9914	27.5096	28.8078	27.6956	27.3076	23.4473	24.7625	23.27	23.7142	24.472		+		+	0.301128	3.28585	-1.12423	3.72922	G_PP1_G_WT;S_PP1_S_WT	DNA-directed RNA polymerase II subunit RPB2, putative	PBANKA_0312400.1-p1	25	25	22.5	22.5	22.5	148.25	0	125.99	1851400000
NaN	NaN	24.7636	NaN	25.033	28.1717	27.9864	27.5975	27.8656	27.9147	24.4765	24.3097	24.7094	24.7058	25.045	NaN	23.8136	24.8836	NaN	NaN	NaN	NaN	22.4009	21.9396	NaN	NaN	NaN	NaN	NaN	NaN	+	+			-1.39442	3.25789	1.04211	-0.353957	G_I2_G_WT;G_PP1_G_WT	dynein heavy chain, putative	PBANKA_0615700.1-p1	52	52	11.5	11.5	11.5	622.63	0	239.32	1705200000
NaN	NaN	NaN	NaN	NaN	NaN	NaN	NaN	22.597	NaN	NaN	NaN	NaN	NaN	NaN	NaN	NaN	NaN	NaN	NaN	24.6845	25.6403	25.9613	25.2886	25.691	NaN	NaN	NaN	NaN	NaN				+	0	0.447587	0	3.28269	S_PP1_S_WT	conserved Plasmodium protein, unknown function	PBANKA_0622800.1-p1	9	9	11.8	11.8	11.8	89.461	0	28.801	219070000
NaN	NaN	NaN	NaN	NaN	25.0352	24.6645	25.0651	25.0739	24.8606	NaN	NaN	NaN	NaN	NaN	NaN	NaN	NaN	NaN	NaN	NaN	23.7351	23.8249	24.1648	NaN	NaN	NaN	NaN	NaN	NaN		+			0	3.23551	0	1.08693	G_PP1_G_WT	CCR4-NOT transcription complex subunit 1, putative	PBANKA_0943100.1-p1	14	14	6.4	6.4	6.4	339.93	0	24.653	264890000
NaN	NaN	NaN	NaN	NaN	26.5195	26.1864	26.8612	26.568	26.4145	23.8816	22.5047	23.4791	23.8467	23.3871	NaN	NaN	NaN	NaN	NaN	NaN	NaN	21.874	NaN	NaN	NaN	NaN	NaN	NaN	NaN	+	+			-1.1829	3.09011	0	0.108197	G_I2_G_WT;G_PP1_G_WT	conserved Plasmodium protein, unknown function	PBANKA_0406200.1-p1	25	25	8.3	8.3	8.3	432.27	0	59.31	637270000
NaN	NaN	NaN	NaN	23.5898	26.1983	25.9927	26.0268	26.6672	25.9279	22.9401	23.7589	24.2391	23.6606	NaN	NaN	NaN	NaN	23.366	NaN	NaN	22.8894	23.423	NaN	NaN	NaN	NaN	NaN	NaN	NaN		+			-0.152689	3.01267	0.320902	0.283727	G_PP1_G_WT	MORN repeat protein, putative	PBANKA_1405000.1-p1	15	15	11.5	11.5	11.5	149.77	0	22.019	554940000
NaN	NaN	NaN	NaN	NaN	23.816	NaN	NaN	NaN	NaN	NaN	NaN	NaN	NaN	NaN	NaN	NaN	NaN	NaN	NaN	25.1544	25.2292	26.3714	25.2646	25.5188	23.7457	NaN	NaN	NaN	NaN				+	0	0.375373	0.578019	3.19323	S_PP1_S_WT	conserved Plasmodium protein, unknown function	PBANKA_0920400.1-p1	11	11	8.6	8.6	8.6	226.22	0	106.66	251720000
NaN	NaN	NaN	NaN	NaN	25.0126	24.8096	24.9432	25.0553	24.7831	NaN	NaN	NaN	NaN	NaN	NaN	NaN	NaN	NaN	NaN	NaN	NaN	NaN	NaN	NaN	NaN	NaN	NaN	NaN	NaN		+			0	3.01163	0	0	G_PP1_G_WT	conserved Plasmodium protein, unknown function	PBANKA_1360800.1-p1	10	10	10.1	10.1	10.1	143.23	0	19.376	203880000
NaN	NaN	22.7352	NaN	23.4284	27.1533	26.3469	27.0034	26.9291	27.0828	23.8896	23.85	23.8567	24.2973	23.6406	25.9558	25.6515	25.3393	25.5414	25.356	27.1164	28.1679	28.3549	28.6942	28.5994	25.6565	24.6869	25.3221	25.5994	25.6483	+	+		+	-1.02094	2.99626	0.186167	2.80393	G_I2_G_WT;G_PP1_G_WT;S_PP1_S_WT	conserved Plasmodium protein, unknown function	PBANKA_1331400.1-p1	52	52	30.4	30.4	30.4	301.55	0	323.31	2584200000
NaN	NaN	NaN	NaN	NaN	25.2637	25.9346	24.6421	25.0919	25.188	NaN	23.3498	NaN	NaN	22.9484	NaN	NaN	NaN	NaN	NaN	25.0195	25.386	26.0322	24.9219	25.4199	NaN	NaN	NaN	NaN	23.4051		+		+	0.246524	2.99603	-0.0500092	3.46345	G_PP1_G_WT;S_PP1_S_WT	small nuclear ribonucleoprotein Sm D2, putative	PBANKA_0315200.1-p1	3	3	24.8	24.8	24.8	11.799	0	4.21	500560000
NaN	NaN	NaN	NaN	NaN	22.7592	22.8552	22.8729	23.7433	22.7139	23.9887	22.6771	23.5176	22.918	22.6862	NaN	NaN	NaN	NaN	NaN	25.1047	25.8615	25.4521	25.4061	25.4511	24.1796	NaN	NaN	NaN	22.6644				+	-0.816701	-0.168608	0.048658	3.01577	S_PP1_S_WT	serine/arginine-rich splicing factor 12, putative	PBANKA_1103000.1-p1	4	4	13.6	13.6	13.6	38.141	0	5.2892	329230000
NaN	NaN	NaN	NaN	NaN	NaN	NaN	NaN	20.851	21.5161	NaN	NaN	NaN	NaN	NaN	23.1769	NaN	22.0913	23.7799	NaN	25.9879	26.8297	27.6167	27.2649	27.211	24.6115	23.6725	23.9506	24.0595	23.7547				+	0	-0.36858	-1.32254	2.97228	S_PP1_S_WT	rhoptry neck protein 5, putative	PBANKA_0713100.1-p1	22	22	24.4	24.4	24.4	131.89	0	218.57	669550000
NaN	NaN	NaN	NaN	NaN	26.8547	26.616	26.622	26.9842	26.554	24.0688	24.09	23.8467	23.9864	23.0135	NaN	NaN	NaN	NaN	NaN	NaN	22.5831	22.3856	22.6685	22.4318	NaN	NaN	NaN	NaN	NaN	+	+			-1.05422	2.92511	0	0.362705	G_I2_G_WT;G_PP1_G_WT	mRNA-binding protein PUF1	PBANKA_1233500.1-p1	16	16	17.2	17.2	17.2	137.25	0	267.5	741120000
NaN	NaN	NaN	NaN	NaN	NaN	NaN	21.0706	20.8244	20.0414	NaN	NaN	NaN	NaN	NaN	24.7962	24.2576	24.7553	25.1712	24.5173	25.7773	27.3275	28.1007	27.8671	28.3934	24.9338	24.6448	24.0969	24.7453	24.4374				+	0	-0.519339	0.127871	2.92153	S_PP1_S_WT	rhoptry neck protein 2	PBANKA_1315700.1-p1	26	26	17.3	17.3	17.3	236.55	0	323.31	1119700000
NaN	NaN	NaN	NaN	NaN	24.5881	25.6143	25.1253	24.3727	25.1058	NaN	NaN	NaN	NaN	NaN	NaN	NaN	NaN	NaN	NaN	24.0896	24.3704	24.7231	24.3521	24.6707	NaN	NaN	NaN	NaN	NaN		+		+	0	2.91333	0	2.24999	G_PP1_G_WT;S_PP1_S_WT	amino acid transporter, putative	PBANKA_1446100.1-p1	7	7	5.4	5.4	5.4	206.38	0	59.692	317950000
NaN	NaN	NaN	NaN	NaN	NaN	NaN	NaN	NaN	NaN	NaN	NaN	NaN	NaN	NaN	NaN	NaN	NaN	NaN	NaN	25.0324	25.3622	25.2817	25.4252	25.5842	NaN	NaN	NaN	24.5385	NaN				+	0	0	0.317863	2.83488	S_PP1_S_WT	myosin A tail domain interacting protein MTIP, putative	PBANKA_1459500.1-p1	8	8	62.7	62.7	62.7	23.763	0	89.872	257440000
NaN	NaN	NaN	NaN	NaN	25.3808	26.3674	26.6298	26.4859	26.5996	22.9484	23.7914	23.5034	24.1674	22.5917	NaN	NaN	NaN	NaN	NaN	NaN	22.9523	23.0991	22.1032	NaN	NaN	NaN	NaN	NaN	NaN		+			-0.521415	2.89221	0	0.568462	G_PP1_G_WT	conserved Plasmodium protein, unknown function	PBANKA_1320200.1-p1	23	23	12.1	12.1	12.1	267.48	0	203.38	597200000
24.215	24.4086	22.9435	23.9143	25.1747	27.8851	27.5915	27.902	27.6289	27.7744	24.6106	24.7489	25.0257	25.0098	24.9764	NaN	NaN	NaN	NaN	NaN	23.8979	24.6816	24.8901	24.5114	24.4439	21.1122	20.7614	20.6698	20.7143	19.7165		+	+	+	-0.74305	2.88208	1.60733	3.89015	G_PP1_G_WT;S_I2_S_WT;S_PP1_S_WT	DNA helicase, putative	PBANKA_0712100.1-p1	27	27	34.9	34.9	34.9	120.76	0	313.02	1620600000
NaN	23.5563	23.0273	22.1083	25.1543	27.7344	27.6189	27.7933	27.7667	27.7969	24.712	24.7558	25.2325	25.0589	24.8615	NaN	NaN	22.4866	21.1642	21.1793	22.6183	24.6733	25.3014	24.779	24.4148	24.2437	24.3399	20.74	22.6346	23.0827	+	+			-1.69164	2.81789	-1.27424	1.34918	G_I2_G_WT;G_PP1_G_WT	structural maintenance of chromosomes protein 3, putative	PBANKA_0716000.1-p1	32	32	28.3	28.3	28.3	139.07	0	167.88	1637300000
NaN	NaN	NaN	NaN	NaN	24.8194	24.633	25.3403	24.7833	24.838	NaN	NaN	NaN	23.4279	23.1903	NaN	NaN	NaN	NaN	NaN	NaN	NaN	23.0282	NaN	NaN	NaN	NaN	NaN	NaN	NaN		+			0.204456	2.806	0	-0.130212	G_PP1_G_WT	allantoicase, putative	PBANKA_1304400.1-p1	7	7	18	18	18	56.085	0	67.932	253520000
NaN	NaN	NaN	NaN	NaN	24.0401	25.2776	24.5591	24.4235	24.4855	NaN	NaN	NaN	NaN	NaN	NaN	NaN	NaN	NaN	NaN	24.9293	24.4256	25.1483	24.7718	25.0891	NaN	NaN	NaN	NaN	NaN		+		+	0	2.73271	0	2.7305	G_PP1_G_WT;S_PP1_S_WT	small nuclear ribonucleoprotein G, putative	PBANKA_0708400.1-p1	2	2	36.1	36.1	36.1	9.45	0	44.884	301520000
25.2148	25.7539	24.2664	24.709	25.4543	28.5148	27.8239	28.2911	28.3694	28.0553	25.3966	25.4206	25.6975	25.626	25.2747	NaN	24.9485	23.0091	23.7861	22.7541	23.0508	25.1075	25.9945	25.8356	25.5201	NaN	21.9521	NaN	22.3291	21.6416		+		+	-0.403408	2.7278	1.47018	3.16263	G_PP1_G_WT;S_PP1_S_WT	DNA polymerase alpha catalytic subunit A, putative	PBANKA_0613200.1-p1	36	36	26.7	26.7	26.7	198.94	0	323.31	2330800000
NaN	NaN	NaN	NaN	NaN	NaN	NaN	NaN	NaN	NaN	NaN	NaN	NaN	NaN	NaN	NaN	NaN	NaN	NaN	NaN	25.0597	25.2728	25.9283	25.5989	25.6771	24.1445	NaN	24.34	NaN	NaN				+	0	0	-0.877026	2.66955	S_PP1_S_WT	fam-a protein	PBANKA_1246141.1-p1;PBANKA_0700521.1-p1;PBANKA_0112701.1-p1;PBANKA_1100750.1-p1	5	4	22.7	22.7	18.6	33.845	0	13.464	249760000
NaN	NaN	NaN	NaN	NaN	23.5431	25.2715	25.51	25.2341	24.7296	24.6775	24.2648	24.8753	25.0693	24.0263	NaN	NaN	NaN	NaN	NaN	26.3257	27.7252	27.9779	27.5754	27.7451	25.5106	24.1503	24.7461	24.4534	25.3933	+		+	+	-1.86012	0.275018	-2.93667	2.61914	G_I2_G_WT;S_I2_S_WT;S_PP1_S_WT	60S ribosomal protein L7-3, putative	PBANKA_1019400.1-p1	6	6	19.7	19.7	19.7	33.284	0	45.705	1251500000
NaN	NaN	NaN	NaN	NaN	NaN	NaN	24.6223	24.0991	NaN	23.0815	23.1962	NaN	23.6582	23.7405	NaN	24.5585	NaN	NaN	NaN	25.2636	26.1055	26.3156	26.089	26.1729	NaN	NaN	24.294	24.8579	24.3621				+	-0.641333	0.0529755	-0.427422	2.60216	S_PP1_S_WT	60S ribosomal protein L22, putative	PBANKA_0709100.1-p1	3	3	19.6	19.6	19.6	16.025	0	7.0503	542520000
NaN	24.3388	NaN	23.5536	24.0935	24.8434	25.6953	25.1376	25.0972	25.3464	NaN	NaN	24.1036	NaN	NaN	25.1556	25.4841	24.4142	25.1826	24.9134	26.3473	25.8421	26.8148	26.3229	26.3583	24.801	24.6352	24.5177	NaN	25.3187		+		+	0.890225	2.71668	0.653123	1.96024	G_PP1_G_WT;S_PP1_S_WT	DNA-directed RNA polymerase II subunit RPB11, putative	PBANKA_1403400.1-p1	4	4	46	46	46	14.206	0	29.505	884150000
NaN	NaN	NaN	NaN	NaN	24.8531	24.8988	25.2572	25.1402	24.7443	NaN	23.2318	23.2288	23.1798	NaN	NaN	NaN	NaN	NaN	NaN	23.6593	24.0782	24.6213	23.7891	24.1238	NaN	NaN	23.6468	NaN	NaN		+		+	0.266932	2.68323	-0.221015	1.93205	G_PP1_G_WT;S_PP1_S_WT	E3 ubiquitin-protein ligase, putative	PBANKA_0802300.1-p1	16	16	6.5	6.5	6.5	405.31	0	34.226	347860000
26.8123	26.8617	NaN	23.0659	25.8125	28.4033	28.3097	28.7456	28.2949	28.4227	25.7209	25.6554	25.9503	26.0189	25.4254	22.7001	NaN	NaN	NaN	22.1146	NaN	26.0809	26.2915	25.8862	26.9988	NaN	NaN	NaN	26.523	22.9737		+		+	-0.8262	2.68105	-0.659034	2.43934	G_PP1_G_WT;S_PP1_S_WT	structural maintenance of chromosomes protein 1, putative	PBANKA_0917500.1-p1	40	40	29	29	29	192.45	0	279.14	2838100000
NaN	NaN	NaN	NaN	NaN	24.8577	25.0505	24.7227	24.5816	24.6853	NaN	NaN	NaN	NaN	NaN	NaN	NaN	NaN	NaN	NaN	NaN	NaN	NaN	NaN	NaN	NaN	NaN	NaN	NaN	NaN		+			0	2.64616	0	0	G_PP1_G_WT	conserved Plasmodium protein, unknown function	PBANKA_1450400.1-p1	8	8	6	6	6	224.21	0	14.91	184380000
NaN	NaN	NaN	NaN	NaN	25.8391	25.3219	25.6036	25.677	25.4808	23.2911	23.0181	22.9764	22.9171	22.6048	NaN	NaN	NaN	NaN	NaN	23.6629	24.8115	24.8784	24.1716	24.2881	NaN	NaN	NaN	NaN	NaN		+		+	-0.199728	2.62299	0	2.08843	G_PP1_G_WT;S_PP1_S_WT	dicarboxylate/tricarboxylate carrier, putative	PBANKA_0706700.1-p1	10	10	36.1	36.1	36.1	35.631	0	19.573	452960000
NaN	NaN	NaN	NaN	NaN	26.8185	26.3933	27.0049	26.515	26.5259	24.6701	24.2656	24.6787	25.0853	NaN	NaN	NaN	NaN	NaN	NaN	NaN	NaN	NaN	NaN	NaN	NaN	NaN	NaN	NaN	NaN	+	+			-1.45503	2.55715	0	0	G_I2_G_WT;G_PP1_G_WT	dynein heavy chain, putative	PBANKA_0601200.1-p1	36	36	7.2	7.2	7.2	665.94	0	89.704	788070000
NaN	NaN	NaN	NaN	NaN	24.356	24.6576	24.4613	24.7255	25.1697	NaN	22.3685	22.8402	22.4728	NaN	NaN	NaN	NaN	NaN	NaN	NaN	NaN	22.9328	22.779	22.6494	NaN	NaN	NaN	NaN	NaN		+			0.46279	2.53594	0	0.518126	G_PP1_G_WT	serine/threonine protein kinase, putative	PBANKA_1306900.1-p1	9	9	10.4	10.4	10.4	156.12	0	31.978	209560000
NaN	NaN	NaN	NaN	NaN	23.9548	24.3717	24.4849	24.4722	24.1167	24.5183	24.129	24.8842	24.7406	24.4189	24.9642	NaN	24.7373	NaN	NaN	26.0697	27.3145	27.2873	27.1495	27.302	23.9724	23.9945	25.0481	24.5221	25.3392	+			+	-1.95582	-0.258164	-1.57782	2.44935	G_I2_G_WT;S_PP1_S_WT	60S ribosomal protein L17, putative	PBANKA_1364200.1-p1	6	6	20.7	20.7	20.7	22.853	0	79.272	983630000
24.5264	26.1261	24.6488	24.3218	25.5012	28.0809	27.8775	28.2438	28.0709	28.052	25.2443	25.5398	26.0702	25.8364	25.0827	NaN	23.1392	NaN	NaN	NaN	24.0719	25.6389	26.1822	26.0228	25.9489	NaN	22.7714	23.9203	22.525	24.163		+		+	-0.529837	2.51034	-0.420277	2.4612	G_PP1_G_WT;S_PP1_S_WT	replication factor C subunit 1, putative	PBANKA_0316000.1-p1	21	21	32.3	32.3	32.3	99.232	0	323.31	2212700000
23.2089	22.9881	22.7624	24.0597	25.591	25.4248	25.841	26.0938	25.9694	25.6877	25.4716	24.9694	25.3827	25.6217	25.0382	25.4315	23.2185	NaN	25.9752	23.0606	27.2552	29.0467	29.1533	28.9502	28.473	26.1948	25.4381	26.4639	26.0528	26.5536	+		+	+	-1.57468	0.506617	-2.08119	2.43506	G_I2_G_WT;S_I2_S_WT;S_PP1_S_WT	60S ribosomal protein L6-2, putative	PBANKA_1351900.1-p1	11	11	42.9	42.9	42.9	26.743	0	153.33	2786800000
NaN	NaN	NaN	NaN	NaN	25.2421	26.5941	25.5471	25.1926	25.485	23.0406	22.9351	23.1306	23.9512	22.7325	NaN	NaN	22.9855	NaN	NaN	25.8838	25.5412	26.2011	25.4989	25.9305	NaN	NaN	NaN	23.7316	22.8285		+		+	-0.284914	2.45418	-0.24462	3.21437	G_PP1_G_WT;S_PP1_S_WT	small nuclear ribonucleoprotein E, putative	PBANKA_1363000.1-p1	4	4	60.6	60.6	60.6	10.994	0	77.412	705110000
NaN	25.155	24.7341	24.9805	24.9824	27.6046	26.2309	27.1425	26.9218	26.8848	24.5783	24.4018	24.2817	24.9618	24.3773	NaN	NaN	NaN	NaN	NaN	NaN	NaN	24.1155	25.0138	23.334	NaN	NaN	NaN	NaN	NaN		+			-0.031477	2.43675	0	1.22811	G_PP1_G_WT	DNA topoisomerase 2, putative	PBANKA_1011400.1-p1	22	22	19.6	19.6	19.6	168.62	0	82.315	1089700000
NaN	24.8147	24.4542	23.6359	24.0526	23.7278	23.874	23.7524	23.6938	23.265	NaN	NaN	NaN	NaN	NaN	NaN	25.2643	24.9946	25.0152	24.6722	24.3602	24.259	24.7877	24.1231	24.0431	NaN	23.6594	23.4843	23.7597	24.0373	+	+			2.48624	2.39253	1.28144	0.956599	G_I2_G_WT;G_PP1_G_WT	splicing factor 3B subunit 5, putative	PBANKA_1132100.1-p1	3	3	41.2	41.2	41.2	9.9962	0	5.276	348450000
NaN	NaN	NaN	NaN	NaN	25.7119	26.7169	26.2654	25.9529	26.0246	23.7231	23.7386	24.2193	23.8267	23.2689	NaN	NaN	NaN	NaN	NaN	25.3109	25.7356	26.3896	25.6445	25.6989	23.6289	NaN	23.7252	24.1828	23.3109		+		+	-0.793856	2.37903	-1.12022	2.45097	G_PP1_G_WT;S_PP1_S_WT	small nuclear ribonucleoprotein-associated protein B, putative	PBANKA_1027900.1-p1	6	6	32.5	32.5	32.5	21.781	0	9.0499	778430000
25.6635	27.1137	25.889	26.5041	27.9812	30.4839	30.1851	30.2563	30.0465	30.1776	27.6947	27.656	28.098	28.3333	27.4937	21.0904	22.5784	21.7791	22.8267	21.1449	22.7838	22.5176	25.6112	23.2237	23.2754	NaN	NaN	22.7528	23.403	21.3239	+	+			-1.22485	2.37474	-0.737023	0.86141	G_I2_G_WT;G_PP1_G_WT	dynein heavy chain, putative	PBANKA_0416100.1-p1	130	129	27.4	27.4	27.2	684.84	0	323.31	8462000000
NaN	NaN	NaN	NaN	NaN	25.1976	24.8194	25.2519	25.3231	25.0158	24.4399	23.4666	NaN	NaN	NaN	NaN	NaN	NaN	NaN	NaN	24.4598	24.9502	24.9688	25.2368	25.3051	NaN	NaN	NaN	NaN	NaN		+		+	0.251647	2.35478	0	3.19455	G_PP1_G_WT;S_PP1_S_WT	ubiquitin carboxyl-terminal hydrolase, putative	PBANKA_0210600.1-p1	11	11	4.7	4.7	4.7	326.23	0	24.144	416780000
NaN	NaN	22.6319	22.5706	24.486	27.2806	26.7808	27.0947	27.3455	27.2525	24.6757	24.8276	24.9228	25.1458	24.5463	22.8843	NaN	22.6273	23.5572	23.4874	25.298	24.9293	26.0211	25.6816	26.1279	23.2701	24.0653	24.8572	24.3457	23.7067	+	+		+	-1.56727	2.32715	-0.872928	1.56258	G_I2_G_WT;G_PP1_G_WT;S_PP1_S_WT	myosin-specific chaperone UNC, putative	PBANKA_1023000.1-p1	24	24	26.4	26.4	26.4	136.2	0	162.58	1304800000
22.0107	NaN	NaN	22.4652	NaN	28.1254	27.7089	28.1746	28.0866	27.6113	25.7195	25.698	25.6635	25.6638	25.382	NaN	NaN	NaN	NaN	NaN	23.5303	24.491	25.4612	24.0587	23.9224	NaN	NaN	NaN	NaN	23.0559	+	+		+	-3.13824	2.316	0.00738602	1.80091	G_I2_G_WT;G_PP1_G_WT;S_PP1_S_WT	DNA polymerase epsilon catalytic subunit A, putative	PBANKA_1129100.1-p1	42	42	19.2	19.2	19.2	334.3	0	140.44	1794900000
NaN	24.5091	NaN	NaN	25.443	27.7652	27.3795	27.816	27.7759	27.7281	25.3776	25.8871	25.1428	25.3932	25.148	24.6678	24.4807	25.0533	25.8752	24.8809	27.1058	27.7474	27.973	28.1614	28.1665	26.0507	25.6876	25.7654	25.9677	26.3027	+	+		+	-2.05018	2.30321	-0.963221	1.87602	G_I2_G_WT;G_PP1_G_WT;S_PP1_S_WT	coatomer alpha subunit, putative	PBANKA_0105400.1-p1	27	27	27.3	27.3	27.3	160.58	0	323.31	2903800000
25.7423	25.9247	24.6586	24.7564	26.239	28.6859	27.8741	28.5715	28.5447	28.4938	26.1537	26.1958	26.1632	26.3121	25.8753	NaN	NaN	NaN	NaN	NaN	22.0226	23.9623	23.9411	23.7007	23.8609	19.531	NaN	NaN	NaN	23.1553		+			-0.675769	2.29402	0.172504	1.28954	G_PP1_G_WT	DNA mismatch repair protein MSH2	PBANKA_0804300.1-p1	26	26	37.2	37.2	37.2	98.111	0	259.84	2632800000
NaN	NaN	NaN	NaN	NaN	23.9717	24.0569	23.8361	23.7579	23.7192	NaN	NaN	NaN	NaN	NaN	NaN	NaN	NaN	NaN	NaN	NaN	NaN	NaN	NaN	NaN	NaN	NaN	NaN	NaN	NaN		+			0	2.25716	0	0	G_PP1_G_WT	conserved Plasmodium protein, unknown function	PBANKA_1358300.1-p1	6	6	6.2	6.2	6.2	167.03	0	16.036	119090000
NaN	NaN	NaN	NaN	NaN	25.1528	25.1619	25.0288	25.2413	25.2864	NaN	NaN	NaN	24.5471	24.4402	NaN	NaN	NaN	NaN	NaN	25.2248	25.1403	25.7199	25.3317	25.501	NaN	NaN	25.0956	NaN	24.6772		+		+	-0.0961716	2.25394	-0.699633	2.38372	G_PP1_G_WT;S_PP1_S_WT	AP-1 complex subunit gamma, putative	PBANKA_1319200.1-p1	12	12	16.5	16.5	16.5	121.51	0	163.02	527970000
NaN	24.9764	NaN	23.4219	24.4862	27.3062	26.8185	27.1753	27.4122	26.9037	24.845	24.6721	25.2311	24.9222	24.6831	22.9388	NaN	23.8322	24.4184	23.2206	25.743	26.3937	26.6411	26.7167	26.6388	25.7054	24.7809	25.4963	25.387	25.1773	+	+	+	+	-1.10541	2.25247	-1.9431	1.11731	G_I2_G_WT;G_PP1_G_WT;S_I2_S_WT;S_PP1_S_WT	DnaJ protein, putative	PBANKA_0706800.1-p1	16	16	31	31	31	75.395	0	323.31	1625000000
NaN	NaN	NaN	NaN	NaN	22.8933	22.5164	22.5814	22.6517	22.4065	22.4161	22.0997	22.4143	NaN	22.3604	NaN	NaN	NaN	NaN	NaN	23.3401	24.4482	23.6409	24.554	24.8033	21.4989	NaN	NaN	22.1279	22.1518				+	0.534888	0.214936	0.66721	2.17916	S_PP1_S_WT	transformer-2 protein homolog beta, putative	PBANKA_1200800.1-p1	3	3	15.7	15.7	15.7	30.195	0	102.71	146030000
NaN	NaN	25.6446	26.4319	25.8166	26.317	26.7801	26.9196	26.9285	26.5223	26.1992	26.2208	26.3346	26.4788	26.1435	25.2772	24.5793	24.8148	26.0037	24.3327	27.8913	28.9533	29.1372	28.9201	29.0586	26.7057	25.8714	26.873	26.7282	26.9953	+		+	+	-1.56387	0.418104	-1.6332	2.15735	G_I2_G_WT;S_I2_S_WT;S_PP1_S_WT	60S ribosomal protein L7, putative	PBANKA_0405500.1-p1	10	10	35	35	35	30.49	0	198.38	3641500000
26.6688	27.7064	26.5398	27.0912	27.3376	29.4577	29.1193	29.3579	29.4922	29.2381	27.0642	26.9096	27.3552	27.3405	26.8029	25.3581	24.8376	25.0148	25.3039	25.6776	26.2519	26.2712	26.8906	26.6967	26.0142	21.7448	23.9964	22.9561	23.1961	26.0838		+		+	-0.0257393	2.23853	1.64295	2.82946	G_PP1_G_WT;S_PP1_S_WT	conserved Plasmodium protein, unknown function	PBANKA_1115200.1-p1	34	34	42.4	42.4	42.4	132.84	0	323.31	5564200000
23.257	NaN	22.2198	22.405	23.5589	NaN	NaN	23.4034	23.8173	NaN	NaN	NaN	NaN	22.8758	NaN	23.4096	22.5348	22.4152	23.1329	22.3077	23.5181	24.4326	25.7507	25.6806	26.8701	23.2123	22.5622	23.1454	23.2425	23.4609	+			+	1.16343	0.449575	-0.364616	2.12576	G_I2_G_WT;S_PP1_S_WT	60S ribosomal protein L21, putative	PBANKA_1018600.1-p1	3	3	21.7	21.7	21.7	18.713	0	9.9014	364840000
NaN	NaN	NaN	NaN	NaN	25.6719	26.2484	26.4109	26.3472	26.0709	25.4019	25.203	26.357	25.735	25.433	NaN	NaN	NaN	NaN	NaN	27.2337	28.666	28.4335	28.2098	28.215	26.2371	25.251	26.2674	26.0992	26.3611	+		+	+	-2.97849	0.523867	-3.97035	2.10848	G_I2_G_WT;S_I2_S_WT;S_PP1_S_WT	ribosomal protein L27a, putative	PBANKA_1117500.1-p1	6	5	39.9	39.9	34.5	16.837	0	10.201	2205900000
NaN	NaN	22.0869	22.4904	22.5982	24.4847	24.434	24.4893	24.6728	24.2943	NaN	22.6665	NaN	23.1594	NaN	NaN	22.2163	NaN	22.5593	22.2638	23.3023	24.0006	24.4069	23.7519	24.2888	NaN	NaN	NaN	NaN	NaN		+		+	0.111838	2.22096	0.317047	1.89694	G_PP1_G_WT;S_PP1_S_WT	choline-phosphate cytidylyltransferase	PBANKA_1415100.1-p1	5	5	11.9	11.9	11.9	100.26	0	11.989	264920000
NaN	NaN	NaN	NaN	24.1498	25.5518	24.9656	25.5791	25.8257	25.9495	24.8099	25.6654	24.6194	25.1872	24.5745	24.8423	NaN	24.3905	24.2681	24.5979	26.2699	25.9368	26.7462	26.5681	26.2332	NaN	NaN	25.5407	26.0921	26.0016	+			+	-1.98796	0.603034	-0.117134	2.09684	G_I2_G_WT;S_PP1_S_WT	40S ribosomal protein S27, putative	PBANKA_1406800.1-p1	4	4	35.4	35.4	35.4	9.2008	0	82.534	953210000
NaN	NaN	NaN	NaN	NaN	24.4968	25.6929	25.0224	24.1012	25.2467	23.0816	22.9375	22.6715	22.9173	NaN	23.3958	NaN	23.5055	23.3691	23.6922	26.0093	25.9908	26.5925	25.972	25.9932	23.6764	23.3672	23.5457	23.5894	23.8352		+		+	-0.358755	2.20718	-0.467207	2.50877	G_PP1_G_WT;S_PP1_S_WT	DNA-directed RNA polymerase II subunit RPB3, putative	PBANKA_0823900.1-p1	7	7	34	34	34	38.594	0	54.243	617670000
NaN	NaN	NaN	NaN	NaN	23.7842	23.4819	23.8611	23.4185	23.6061	NaN	NaN	NaN	NaN	NaN	NaN	NaN	NaN	NaN	NaN	NaN	NaN	22.8825	NaN	NaN	NaN	NaN	NaN	NaN	NaN		+			0	2.20387	0	-0.102274	G_PP1_G_WT	tyrosine kinase-like protein, putative	PBANKA_1362100.1-p1	4	4	3.1	3.1	3.1	164.33	0	4.4668	94143000
23.7323	NaN	NaN	NaN	23.8427	26.3124	26.3859	26.324	26.3949	25.9292	24.1045	24.155	24.1926	24.4196	23.5043	NaN	NaN	NaN	NaN	NaN	NaN	23.4094	23.725	NaN	23.2337	NaN	NaN	NaN	NaN	NaN	+	+			-1.28666	2.19407	0	0.46993	G_I2_G_WT;G_PP1_G_WT	conserved Plasmodium protein, unknown function	PBANKA_1102900.1-p1	12	12	16.9	16.9	16.9	101.56	0	74.126	617640000
27.3144	28.5999	25.4822	25.6187	27.1503	26.1115	25.9412	25.6686	25.8952	25.9831	25.6488	25.5503	26.7749	25.8379	26.4483	28.8276	27.5967	25.9309	25.7967	26.1081	28.1451	27.8424	27.7817	27.2958	27.2122	25.9776	24.5463	25.6631	26.7532	25.1686				+	0.781034	-0.132138	1.23023	2.03367	S_PP1_S_WT	conserved Plasmodium protein, unknown function	PBANKA_1424300.1-p1	7	7	20.4	20.4	20.4	32.586	0	28.642	2759300000
NaN	NaN	NaN	NaN	23.7771	27.2974	27.2734	27.3412	27.5938	27.3917	25.2795	25.1271	25.5811	25.5695	24.418	NaN	NaN	NaN	NaN	NaN	NaN	NaN	23.4144	NaN	NaN	NaN	NaN	NaN	NaN	NaN	+	+			-2.21891	2.18447	0	0.51236	G_I2_G_WT;G_PP1_G_WT	dynein beta chain, putative	PBANKA_1329200.1-p1	47	47	9.6	9.6	9.6	766.29	0	225.12	1316700000
26.5566	27.674	27.3904	26.1225	28.0826	30.0176	29.5344	29.9038	29.9407	29.6278	27.8218	26.7912	28.4964	27.8954	27.1091	21.125	21.7731	21.5255	20.935	22.8859	23.5807	23.6347	25.2748	24.2768	24.1874	25.0278	24.8654	20.9687	NaN	21.7897		+			-0.457552	2.18209	-1.31756	1.22443	G_PP1_G_WT	dynein heavy chain, putative	PBANKA_0507300.1-p1	108	107	24.7	24.7	24.5	623.48	0	323.31	6584300000
NaN	NaN	NaN	NaN	23.9965	24.5473	25.197	25.0981	25.3976	25.0199	25.3133	24.5473	25.3072	25.1581	24.8214	25.5191	24.359	23.9514	25.8541	24.2372	26.6682	27.6006	27.9775	27.7073	27.8102	25.7815	24.5122	25.7604	25.7874	25.9775	+			+	-2.29712	0.0225327	-0.779652	1.98895	G_I2_G_WT;S_PP1_S_WT	40S ribosomal protein S8e, putative	PBANKA_1033900.1-p1	5	4	30.7	30.7	23.9	24.993	0	65.107	1453900000
NaN	NaN	NaN	NaN	NaN	23.9202	24.1147	24.134	24.0589	24.1172	NaN	NaN	NaN	NaN	NaN	NaN	NaN	NaN	NaN	NaN	NaN	NaN	24.6157	24.5012	24.7015	NaN	NaN	NaN	NaN	NaN		+		+	0	2.16857	0	1.68015	G_PP1_G_WT;S_PP1_S_WT	PHAX domain-containing protein, putative	PBANKA_0506100.1-p1	8	8	5.4	5.4	5.4	194.52	0	7.7925	203120000
NaN	NaN	NaN	NaN	NaN	26.4565	25.8269	26.2911	25.7389	26.0698	23.667	23.9559	23.976	24.1395	23.8394	NaN	NaN	NaN	NaN	NaN	NaN	NaN	NaN	NaN	23.2887	NaN	NaN	NaN	NaN	NaN	+	+			-1.48243	2.16108	0	-0.192255	G_I2_G_WT;G_PP1_G_WT	conserved Plasmodium protein, unknown function	PBANKA_1348800.1-p1	14	14	21.7	21.7	21.7	105.78	0	172.98	579710000
NaN	NaN	NaN	NaN	NaN	23.8301	23.6761	23.8567	23.838	23.8701	NaN	NaN	NaN	NaN	NaN	NaN	NaN	NaN	NaN	NaN	NaN	NaN	NaN	NaN	NaN	NaN	NaN	NaN	NaN	NaN		+			0	2.15016	0	0	G_PP1_G_WT	conserved Plasmodium protein, unknown function	PBANKA_0906200.1-p1	3	3	14.5	14.5	14.5	32.68	0.00050125	3.2094	101630000
NaN	NaN	NaN	NaN	NaN	24.0664	24.1066	24.1135	23.96	23.7556	NaN	NaN	NaN	NaN	NaN	NaN	NaN	NaN	NaN	NaN	NaN	23.9947	24.1252	23.8813	24.2714	NaN	NaN	23.8235	NaN	NaN		+			0	2.14082	-0.576981	1.29779	G_PP1_G_WT	tryptophan-rich protein	PBANKA_1146000.1-p1	5	5	12	12	12	77.579	0	12.19	187490000
NaN	NaN	NaN	NaN	NaN	24.6579	24.1456	24.3498	24.321	24.0313	NaN	NaN	NaN	NaN	NaN	NaN	NaN	NaN	NaN	NaN	24.1527	24.139	24.1471	24.7949	NaN	NaN	NaN	NaN	NaN	NaN		+		+	0	2.13708	0	1.75887	G_PP1_G_WT;S_PP1_S_WT	3-oxo-5-alpha-steroid 4-dehydrogenase, putative	PBANKA_0912700.1-p1	4	4	16.6	16.6	16.6	35.158	0	23.61	218830000
NaN	NaN	NaN	NaN	NaN	23.4925	24.7187	24.7718	23.6966	NaN	23.6552	24.2742	23.7701	23.7021	24.2701	25.0583	24.0844	24.5822	24.3758	25.0563	25.7532	26.1521	26.8223	26.8795	27.1504	25.5493	24.0073	23.3978	25.3119	24.6845	+			+	-1.5799	-0.149926	0.0412575	1.96132	G_I2_G_WT;S_PP1_S_WT	acyl-CoA synthetase, putative	PBANKA_0311800.1-p1	20	20	32.8	32.8	32.8	86.205	0	221.17	779800000
23.1476	23.3286	22.7582	22.9352	23.1547	27.4696	26.7554	28.3138	28.3506	28.3364	25.6509	25.3836	25.6884	25.9297	25.9034	22.7561	NaN	23.0601	22.9865	NaN	25.8981	27.7007	26.942	27.2968	28.0395	25.4157	25.0139	25.42	25.5221	25.6797	+	+	+	+	-2.64636	2.13395	-2.90806	1.7651	G_I2_G_WT;G_PP1_G_WT;S_I2_S_WT;S_PP1_S_WT	eukaryotic translation initiation factor 3 subunit B, putative	PBANKA_1232500.1-p1	25	25	36.5	36.5	36.5	84.182	0	323.31	2566500000
NaN	NaN	NaN	NaN	NaN	NaN	22.9057	NaN	23.5935	NaN	NaN	NaN	NaN	23.0454	NaN	NaN	NaN	NaN	NaN	NaN	24.6466	24.5292	24.9245	25.5183	25.4922	23.2763	NaN	23.4721	23.3458	23.736				+	0.075779	0.201738	-0.183279	1.94071	S_PP1_S_WT	conserved Plasmodium protein, unknown function	PBANKA_0836200.1-p1	7	7	13.8	13.8	13.8	79.491	0	64.38	254920000
NaN	NaN	NaN	NaN	NaN	24.2213	23.8239	24.1894	24.2499	23.9326	NaN	NaN	NaN	24.0923	NaN	NaN	NaN	NaN	NaN	NaN	NaN	24.2616	24.377	24.3076	NaN	NaN	NaN	NaN	NaN	NaN		+			0.500083	2.13388	0	1.16423	G_PP1_G_WT	coatomer subunit epsilon, putative	PBANKA_1222300.1-p1	4	4	17.7	17.7	17.7	33.674	0	22.037	260960000
NaN	NaN	NaN	NaN	NaN	NaN	NaN	NaN	NaN	NaN	NaN	NaN	NaN	NaN	NaN	NaN	NaN	NaN	NaN	NaN	25.0098	25.4344	25.3166	24.5846	25.2533	23.2807	23.815	NaN	23.1788	23.3844				+	0	0	-0.567923	1.93067	S_PP1_S_WT	fam-a protein	PBANKA_0008101.1-p1;PBANKA_1300011.1-p1;PBANKA_0600021.1-p1;PBANKA_0007501.1-p1;PBANKA_0001601.1-p1;PBANKA_1200011.1-p1	6	5	28.6	28.6	24.8	37.019	0	30.074	210840000
27.1309	26.7913	25.0032	26.5464	26.5395	27.6477	27.9789	27.9548	28.0298	27.9348	27.5013	27.2957	27.6026	27.695	27.2576	27.0269	26.2911	26.6385	28.0043	26.2018	29.4266	30.4621	30.4811	30.3887	30.5119	28.6075	27.6404	28.5325	28.2023	28.6368	+		+	+	-1.06818	0.438777	-1.49138	1.93019	G_I2_G_WT;S_I2_S_WT;S_PP1_S_WT	60S ribosomal protein L4, putative	PBANKA_1106700.1-p1	16	16	40.6	40.6	40.6	46.131	0	244.07	9415700000
NaN	NaN	NaN	NaN	NaN	24.746	24.7501	25.0759	24.8091	24.7503	NaN	NaN	23.4981	23.4375	NaN	NaN	NaN	NaN	NaN	NaN	24.3336	24.7842	24.7621	25.1671	25.2204	24.8403	NaN	NaN	24.6682	24.3705		+			-0.169177	2.10787	-1.24141	1.43154	G_PP1_G_WT	conserved Plasmodium protein, unknown function	PBANKA_0404000.1-p1	11	11	4.5	4.5	4.5	393.73	0	23	361450000
NaN	NaN	NaN	NaN	NaN	23.5283	23.7821	23.2515	23.3988	23.7506	NaN	NaN	NaN	NaN	22.9997	NaN	NaN	NaN	NaN	NaN	NaN	NaN	NaN	NaN	NaN	NaN	NaN	NaN	NaN	NaN	+	+			1.46665	2.10682	0	0	G_I2_G_WT;G_PP1_G_WT	serine/threonine protein kinase, putative	PBANKA_0933000.1-p1	3	3	5.4	5.4	5.4	82.154	0	3.7581	130430000
NaN	NaN	24.2829	NaN	NaN	26.3027	25.6954	26.1844	26.1433	25.8807	23.5054	24.059	24.5179	24.1373	23.4595	NaN	NaN	NaN	NaN	NaN	NaN	23.1576	NaN	22.6307	NaN	NaN	NaN	NaN	NaN	NaN	+	+			-1.35509	2.10551	0	0.240234	G_I2_G_WT;G_PP1_G_WT	WD repeat-containing protein 65, putative	PBANKA_1035700.1-p1	13	13	10.1	10.1	10.1	169.87	0	36.324	539560000
24.1514	24.5571	24.0854	24.0444	24.379	27.9535	27.0563	27.1662	27.6536	27.6493	25.4967	25.158	25.3265	25.7462	25.2285	NaN	NaN	NaN	NaN	NaN	NaN	23.6044	24.4663	23.3728	22.8627	NaN	NaN	23.7744	NaN	22.5915	+	+			-1.14776	2.10459	-0.0974754	0.635135	G_I2_G_WT;G_PP1_G_WT	conserved Plasmodium protein, unknown function	PBANKA_0801500.1-p1	17	17	30.1	30.1	30.1	88.717	0	323.31	1411200000
24.6827	NaN	24.1175	24.7133	24.1999	24.641	24.0922	23.953	24.234	24.2576	24.423	24.2039	24.1261	24.4114	23.7311	24.9635	NaN	26.0514	26.1995	24.7863	25.4799	26.5354	26.2879	26.1862	26.2324	24.8083	23.9129	25.0178	24.3221	23.2755				+	-0.0383316	0.0564304	0.798843	1.87703	S_PP1_S_WT	60S ribosomal protein L24, putative	PBANKA_1407600.1-p1	4	4	16	16	16	18.95	0	9.405	826130000
25.6118	25.7135	25.0947	24.9214	25.4342	27.4765	27.6283	27.7982	27.7095	27.7025	25.6681	25.5358	25.5548	25.7665	25.3388	NaN	23.9891	24.8917	24.881	24.1601	25.7182	26.5348	26.9148	26.867	26.7424	25.0919	24.8631	24.2428	25.2899	25.4653		+		+	-0.217662	2.0902	-0.990688	1.56484	G_PP1_G_WT;S_PP1_S_WT	DnaJ protein, putative	PBANKA_1127800.1-p1	16	16	49.3	49.3	49.3	44.229	0	105.54	2283200000
26.9116	27.1809	25.9561	26.768	26.9285	26.9771	26.8452	26.9886	27.3946	27.1725	26.7197	26.8039	26.9676	27.0273	26.985	27.759	28.066	27.5006	28.1814	27.4519	28.8916	29.3168	29.4299	29.2378	29.3463	27.4701	26.5815	27.6651	27.514	27.6818				+	-0.151692	0.174863	0.409303	1.86198	S_PP1_S_WT	40S ribosomal protein S16, putative	PBANKA_1423600.1-p1	7	7	44.4	44.4	44.4	16.36	0	88.198	5302600000
NaN	NaN	NaN	NaN	NaN	NaN	NaN	NaN	NaN	NaN	NaN	NaN	NaN	NaN	NaN	NaN	NaN	NaN	NaN	NaN	23.7546	24.2881	24.6467	24.6264	24.0738	NaN	NaN	NaN	NaN	NaN				+	0	0	0	1.85275	S_PP1_S_WT	nucleolar GTP-binding protein 1, putative	PBANKA_0111200.1-p1	6	6	10.6	10.6	10.6	78.442	0	9.2233	92347000
NaN	NaN	NaN	NaN	NaN	23.9866	23.8932	24.2356	24.0527	24.0033	NaN	NaN	NaN	NaN	NaN	NaN	NaN	NaN	NaN	NaN	NaN	NaN	23.8695	NaN	NaN	NaN	NaN	NaN	NaN	NaN		+			0	2.05574	0	0.3515	G_PP1_G_WT	ubiquitin-like protein nedd8 homologue, putative	PBANKA_1411400.1-p1	2	2	37.2	37.2	37.2	8.8773	0	7.3342	143590000
NaN	NaN	NaN	NaN	NaN	26.8215	26.754	26.9384	26.9492	26.8358	26.3457	26.0515	26.4393	26.6	26.2247	NaN	NaN	NaN	NaN	NaN	28.106	28.9909	29.2004	28.9925	29.0845	27.1588	26.0546	27.4147	27.1055	27.4936	+		+	+	-3.33684	0.527552	-4.54506	1.82944	G_I2_G_WT;S_I2_S_WT;S_PP1_S_WT	60S ribosomal protein L13, putative	PBANKA_1202400.1-p1	7	7	31.7	31.7	31.7	23.767	0	35.959	3592800000
NaN	NaN	NaN	NaN	NaN	25.9621	25.8722	25.9577	25.8972	25.9123	23.6437	23.6769	24.0356	24.4131	23.7561	NaN	NaN	NaN	NaN	NaN	23.6305	23.5491	23.5993	24.2551	NaN	NaN	NaN	NaN	NaN	NaN	+	+		+	-1.71215	2.0152	0	1.41633	G_I2_G_WT;G_PP1_G_WT;S_PP1_S_WT	subtilisin-like protease 2	PBANKA_0911700.1-p1	13	13	15.1	15.1	15.1	141.32	0	74.014	502570000
23.1515	24.5565	22.6964	23.6308	24.3422	25.5369	25.5963	26.2032	26.0579	25.9324	22.9785	24.1481	23.7776	24.5867	23.7942	NaN	22.9465	23.7826	23.2647	23.4371	25.0376	25.2259	25.5574	25.7487	25.9029	24.9027	23.6722	24.1943	24.6977	NaN		+		+	-0.181544	2.0083	-0.681409	1.76101	G_PP1_G_WT;S_PP1_S_WT	conserved Plasmodium protein, unknown function	PBANKA_1023500.1-p1	6	6	18.9	18.9	18.9	55.077	0	284.15	797730000
NaN	NaN	NaN	NaN	NaN	24.477	24.022	24.4777	23.996	24.2443	NaN	NaN	NaN	NaN	NaN	NaN	NaN	NaN	NaN	NaN	NaN	NaN	NaN	NaN	NaN	NaN	NaN	NaN	NaN	NaN		+			0	2.007	0	0	G_PP1_G_WT	Dpy-19-like C-mannosyltransferase, putative	PBANKA_1224500.1-p1	6	6	7.1	7.1	7.1	123.25	0	15.519	160050000
NaN	NaN	NaN	NaN	23.492	23.8527	23.8664	23.9946	23.5126	23.6326	NaN	NaN	NaN	NaN	NaN	NaN	NaN	NaN	NaN	NaN	23.845	NaN	23.7607	NaN	NaN	NaN	NaN	NaN	NaN	NaN		+			0.762445	1.99078	0	0.927326	G_PP1_G_WT	conserved protein, unknown function	PBANKA_1363900.1-p1	2	2	20	20	20	18.143	0	20.675	167160000
NaN	NaN	NaN	NaN	NaN	24.2179	23.8161	23.6729	23.7267	23.9441	NaN	NaN	NaN	22.7139	NaN	NaN	NaN	NaN	NaN	NaN	NaN	NaN	NaN	NaN	NaN	NaN	NaN	NaN	NaN	NaN		+			0.57357	1.99047	0	0	G_PP1_G_WT	conserved Apicomplexan protein, unknown function	PBANKA_0206000.1-p1	3	3	22.5	22.5	22.5	20.494	0	10.458	122270000
NaN	NaN	NaN	NaN	NaN	25.3469	24.9088	25.4477	24.8231	25.151	23.4748	NaN	24.9079	24.4092	NaN	NaN	NaN	NaN	NaN	NaN	25.081	NaN	25.5139	25.3631	25.272	NaN	24.2929	NaN	NaN	NaN		+		+	-0.493208	1.98638	-0.424621	1.90122	G_PP1_G_WT;S_PP1_S_WT	casein kinase II beta chain, putative	PBANKA_0943200.1-p1	2	2	14.8	14.8	14.8	27.978	0	22.103	574580000
NaN	NaN	NaN	NaN	NaN	25.3704	24.9914	25.2952	24.8929	25.5876	23.5657	23.9178	24.1223	23.6431	NaN	NaN	NaN	NaN	NaN	NaN	NaN	24.0023	24.4405	24.3492	23.9485	NaN	NaN	NaN	NaN	NaN		+		+	-0.25945	1.97106	0	1.75974	G_PP1_G_WT;S_PP1_S_WT	conserved Apicomplexan protein, unknown function	PBANKA_0923200.1-p1	9	9	20.7	20.7	20.7	59.015	0	30.8	365600000
NaN	NaN	NaN	NaN	NaN	24.3426	23.5	23.5002	23.6338	23.5374	23.1174	NaN	NaN	NaN	NaN	NaN	NaN	NaN	NaN	NaN	22.9648	NaN	22.8882	NaN	NaN	NaN	NaN	NaN	NaN	NaN		+			0.562572	1.94986	0	0.439749	G_PP1_G_WT	protein disulfide-isomerase, putative	PBANKA_1335800.1-p1	3	3	6.6	6.6	6.6	65.082	0	4.9561	117270000
NaN	NaN	NaN	NaN	NaN	24.6507	24.2173	24.4098	23.9856	24.1853	NaN	NaN	NaN	NaN	NaN	NaN	NaN	NaN	NaN	NaN	NaN	NaN	NaN	NaN	NaN	NaN	NaN	NaN	NaN	NaN		+			0	1.94677	0	0	G_PP1_G_WT	condensin-2 complex subunit D3, putative	PBANKA_0913000.1-p1	10	10	7.7	7.7	7.7	202.27	0	9.0133	130840000
NaN	NaN	NaN	NaN	NaN	NaN	NaN	NaN	NaN	NaN	NaN	NaN	NaN	NaN	NaN	NaN	NaN	NaN	NaN	NaN	24.2347	24.5839	24.2826	23.9848	24.2796	NaN	NaN	NaN	23.8686	NaN				+	0	0	-0.477975	1.77992	S_PP1_S_WT	eukaryotic translation initiation factor 6, putative	PBANKA_1347600.1-p1	3	3	17.8	17.8	17.8	27.214	0	48.262	124530000
26.1088	24.17	24.1948	25.5332	26.3436	28.2332	26.8737	28.0131	28.2628	27.9098	25.8371	26.0965	25.8977	26.1898	25.5478	24.7625	24.8405	26.2173	25.5267	26.2892	27.9879	27.1507	28.1669	28.3075	28.1589	25.5075	24.8821	24.4558	26.0829	26.5639		+		+	-0.643681	1.94478	0.0287926	2.45594	G_PP1_G_WT;S_PP1_S_WT	clathrin heavy chain, putative	PBANKA_1434700.1-p1	31	31	22.8	22.2	22.2	230.16	0	323.31	3401600000
NaN	NaN	NaN	NaN	NaN	24.5411	26.2945	24.9152	25.2531	24.7904	23.2621	23.0742	23.7298	23.0555	22.9814	NaN	NaN	NaN	NaN	NaN	25.5513	25.7338	26.3052	24.9609	25.7637	23.2289	22.5454	23.2321	23.1101	22.8293	+	+		+	-1.20063	1.93828	-0.742406	2.67385	G_I2_G_WT;G_PP1_G_WT;S_PP1_S_WT	small nuclear ribonucleoprotein Sm D3, putative	PBANKA_0811000.1-p1	4	4	39.7	39.7	39.7	12.852	0	17.293	570320000
NaN	NaN	NaN	NaN	NaN	25.2356	25.3353	25.4433	25.6393	25.4895	22.5233	23.7921	23.7677	23.8446	23.5527	NaN	NaN	NaN	NaN	NaN	24.1145	23.8492	24.8028	24.5116	24.122	NaN	NaN	NaN	NaN	22.991	+	+		+	-1.33515	1.93249	0.294154	2.22106	G_I2_G_WT;G_PP1_G_WT;S_PP1_S_WT	conserved Plasmodium protein, unknown function	PBANKA_0906900.1-p1	15	15	9.2	9.2	9.2	273.17	0	151.19	434460000
NaN	NaN	NaN	NaN	NaN	23.3815	23.3728	23.932	23.1963	23.3512	NaN	NaN	NaN	NaN	NaN	NaN	NaN	NaN	NaN	NaN	NaN	NaN	NaN	NaN	NaN	NaN	NaN	NaN	NaN	NaN		+			0	1.9307	0	0	G_PP1_G_WT	leucine-rich repeat protein	PBANKA_1012500.1-p1	6	6	5.3	5.3	5.3	177.24	0	10.567	125930000
NaN	NaN	NaN	NaN	NaN	24.0436	24.6808	24.3671	24.466	24.4934	NaN	NaN	23.0129	22.7456	22.5621	NaN	NaN	NaN	NaN	NaN	NaN	NaN	NaN	NaN	NaN	NaN	NaN	NaN	NaN	NaN		+			-0.0880898	1.9299	0	0	G_PP1_G_WT	gamma-tubulin complex component, putative	PBANKA_0834300.1-p1	8	8	7	7	7	146.24	0	15.461	160700000
NaN	NaN	NaN	NaN	NaN	26.0872	26.0102	26.7188	25.9914	26.0619	23.9356	24.3354	24.1874	24.0483	24.738	NaN	NaN	NaN	NaN	NaN	NaN	23.0932	23.4746	23.6379	22.9579	NaN	NaN	NaN	NaN	23.133	+	+			-1.68091	1.92497	0.214478	0.975823	G_I2_G_WT;G_PP1_G_WT	lysine decarboxylase, putative	PBANKA_1003400.1-p1	15	15	9.5	9.5	9.5	261.21	0	69.266	598870000
26.18	24.9865	22.9996	26.1617	25.4917	27.651	27.0482	27.5537	27.4678	27.5283	25.5383	25.4791	25.5818	25.6619	25.3648	25.9235	25.6598	24.4406	25.8253	26.0773	27.0679	27.4773	27.895	27.8005	27.8648	26.1158	25.5771	25.9863	26.0725	26.2891		+		+	-0.361294	1.92461	-0.422872	1.61297	G_PP1_G_WT;S_PP1_S_WT	coatomer subunit beta, putative	PBANKA_1014900.1-p1	26	26	27.1	27.1	27.1	145.62	0	323.31	2787300000
25.7949	25.916	23.8995	25.3971	25.8171	26.579	26.6174	26.6843	26.2232	26.4885	26.3119	25.639	26.2062	26.287	25.872	25.4968	24.9639	25.039	26.2733	23.2703	26.9437	27.9951	28.6265	27.6355	27.9659	26.4768	25.3452	26.1276	26.4724	26.0177				+	-0.698327	0.45527	-1.07931	1.7454	S_PP1_S_WT	60S ribosomal protein L1, putative	PBANKA_1305100.1-p1	12	12	43.8	43.8	43.8	24.819	0	27.326	2337900000
25.8002	25.7916	NaN	NaN	25.638	26.4082	26.2791	26.401	26.4215	26.3264	25.2174	25.8298	26.264	25.7784	26.0482	25.8121	26.0312	25.8571	26.6162	25.3999	27.6055	28.6473	28.5794	28.4237	28.4863	26.5216	26.0788	26.8979	26.519	27.0153	+			+	-1.75398	0.539657	-0.663222	1.74193	G_I2_G_WT;S_PP1_S_WT	60S ribosomal protein L14, putative	PBANKA_1013100.1-p1	7	7	39.7	39.7	39.7	17.924	0	83.298	2858400000
NaN	NaN	NaN	NaN	NaN	NaN	NaN	NaN	NaN	NaN	NaN	NaN	NaN	NaN	NaN	26.5367	26.1914	25.8915	26.2691	26.654	25.3397	25.2039	25.4781	24.63	24.61	23.8731	22.5277	NaN	24.0739	24.6055			+	+	0	0	2.99219	1.736	S_I2_S_WT;S_PP1_S_WT	inner membrane complex protein 1g, putative	PBANKA_1240600.1-p1	4	4	13.1	13.1	13.1	34.316	0	7.4885	509640000
NaN	NaN	NaN	NaN	NaN	24.4151	23.7894	24.4936	24.5348	24.4415	23.1249	NaN	23.0702	23.2341	NaN	NaN	NaN	NaN	NaN	NaN	NaN	23.8361	24.0635	24.6779	24.3732	NaN	NaN	NaN	NaN	23.5284		+		+	0.234849	1.90039	-0.166879	1.78754	G_PP1_G_WT;S_PP1_S_WT	berghepain-1	PBANKA_1321700.1-p1	4	4	11	11	11	60.311	0	21.915	233150000
NaN	NaN	NaN	NaN	NaN	22.7479	NaN	22.6662	23.0028	NaN	NaN	NaN	NaN	NaN	NaN	NaN	NaN	NaN	NaN	NaN	23.5417	23.6798	24.3048	25.1643	25.1955	23.069	NaN	NaN	23.5199	22.5035				+	0	0.657803	-0.62024	1.7315	S_PP1_S_WT	rhoptry neck protein 3, putative	PBANKA_1464900.1-p1	9	9	4.9	4.9	4.9	264.82	0	15.389	153510000
26.2865	26.4267	25.6566	26.2965	26.0935	27.5089	27.1956	27.2849	27.5803	27.2823	27.0252	27.1603	27.2754	26.6608	26.6349	26.6938	26.7345	26.6442	27.5276	26.5217	28.5342	29.5943	29.4893	29.4532	29.5343	27.8271	26.6428	27.9242	27.6063	27.9519				+	-0.799388	0.41909	-0.766074	1.73063	S_PP1_S_WT	60S ribosomal protein L5, putative	PBANKA_1019500.1-p1	15	15	49.1	49.1	49.1	33.882	0	96.719	5779900000
NaN	NaN	NaN	NaN	NaN	24.514	24.0729	24.041	24.1256	23.9569	NaN	NaN	23.1979	23.2757	NaN	NaN	NaN	NaN	NaN	NaN	NaN	NaN	22.6559	NaN	NaN	NaN	NaN	NaN	NaN	NaN		+			0.271156	1.89737	0	0.480921	G_PP1_G_WT	nuclear formin-like protein MISFIT	PBANKA_1038200.1-p1	6	6	4.6	4.6	4.6	185.88	0	8.2927	154450000
25.4437	25.3748	25.1558	24.7488	25.2758	27.9001	27.6165	27.7306	28.074	27.3843	25.7885	25.765	25.8577	25.8662	25.9463	25.3595	24.6463	25.0934	24.919	25.258	26.4604	26.4159	26.9052	26.8635	26.775	24.5119	24.2816	25.1812	25.8068	25.0925		+		+	-0.644963	1.89637	0.0804501	1.70922	G_PP1_G_WT;S_PP1_S_WT	mitochondrial phosphate carrier protein, putative	PBANKA_0601100.1-p1	7	7	24.1	24.1	24.1	36.478	0	38.474	2070200000
27.3256	27.8387	27.3843	26.4953	28.3525	30.4387	29.6813	30.1775	30.233	29.8558	28.2379	28.2188	28.4864	28.5234	27.4594	23.1436	21.8676	24.3909	25.0337	23.4173	23.0686	24.5608	26.0052	22.8701	22.5836	21.4647	NaN	20.9452	20.9359	22.9041		+	+	+	-0.70591	1.89207	1.80814	2.05519	G_PP1_G_WT;S_I2_S_WT;S_PP1_S_WT	dynein heavy chain, putative	PBANKA_0925400.1-p1	123	123	29.7	29.7	29.7	604.54	0	323.31	8280800000
NaN	NaN	NaN	NaN	NaN	24.0422	24.0769	24.0704	24.1497	24.2644	NaN	NaN	NaN	NaN	NaN	NaN	NaN	NaN	NaN	NaN	NaN	24.28	24.3997	23.9587	23.8802	NaN	NaN	NaN	NaN	NaN		+		+	0	1.88289	0	1.7632	G_PP1_G_WT;S_PP1_S_WT	pre-mRNA-processing factor 6, putative	PBANKA_0937400.1-p1	10	10	12.6	12.6	12.6	133.1	0	17.631	201710000
22.7126	23.6593	22.8171	NaN	23.1628	25.5914	26.9079	26.2223	25.9888	25.9917	23.9143	24.4361	24.4486	24.1662	24.3273	24.1862	23.4131	23.6537	24.0762	24.0632	26.1896	26.529	26.8029	26.2581	26.3817	24.9626	23.8086	23.8109	24.5044	23.9508	+	+		+	-1.28647	1.88194	-0.328986	2.22481	G_I2_G_WT;G_PP1_G_WT;S_PP1_S_WT	small nuclear ribonucleoprotein Sm D1, putative	PBANKA_0922800.1-p1	5	5	52	52	52	13.919	0	62.795	1059100000
29.2373	29.4254	28.5548	28.8175	29.0096	30.7977	30.7231	31.0107	30.8727	30.8352	28.8989	29.0066	29.052	29.0422	28.8514	28.3646	28.2405	28.1925	28.6471	28.0676	28.8868	29.0745	29.3665	29.3036	29.0928	28.1263	27.9867	27.8226	27.6225	28.504		+		+	0.0386826	1.87766	0.290058	1.13242	G_PP1_G_WT;S_PP1_S_WT	ATP-dependent RNA helicase DDX6	PBANKA_1217700.1-p1	25	25	58.2	58.2	58.2	49.375	0	323.31	20334000000
NaN	NaN	NaN	NaN	NaN	27.0551	26.9482	27.0783	26.8987	26.9565	25.0448	24.8399	25.1841	25.2354	25.3386	NaN	NaN	NaN	NaN	NaN	25.8156	26.3343	26.5178	26.851	26.681	NaN	NaN	NaN	25.0774	NaN	+	+		+	-1.96593	1.85879	-0.0561352	3.6111	G_I2_G_WT;G_PP1_G_WT;S_PP1_S_WT	heat shock protein DNAJ homologue Pfj4, putative	PBANKA_0609900.1-p1	7	7	36.7	36.7	36.7	27.879	0	52.266	1447900000
26.4904	26.5926	25.9968	26.2216	26.2441	28.3545	27.952	28.3025	28.3125	28.1781	26.2462	26.5816	26.409	26.3096	26.2631	26.4392	26.339	26.1233	26.5518	26.3468	27.5496	27.7029	28.0998	28.1049	28.076	26.7069	26.2029	26.6071	26.6724	26.9819		+		+	-0.0528168	1.85799	-0.274206	1.2724	G_PP1_G_WT;S_PP1_S_WT	26S protease regulatory subunit 10B, putative	PBANKA_1404900.1-p1	12	12	40.5	37.4	37.4	44.721	0	113.24	4222800000
NaN	NaN	NaN	NaN	NaN	NaN	NaN	21.9745	22.1388	NaN	NaN	NaN	NaN	NaN	NaN	NaN	NaN	NaN	NaN	NaN	23.209	24.16	24.0891	24.3002	24.2687	22.4386	NaN	23.0263	22.8347	22.6916				+	0	0.045348	0.225066	1.64588	S_PP1_S_WT	thioredoxin-like protein, putative	PBANKA_1024000.1-p1	4	4	9.9	9.9	9.9	74.167	0	21.158	110350000
23.775	24.8238	24.3705	23.967	24.3236	24.1098	25.1356	24.4415	24.375	24.771	22.7918	22.8723	23.2013	22.9294	NaN	23.5147	22.5248	23.4215	22.9136	22.7353	23.3361	23.2975	23.7851	23.4942	23.5759	NaN	NaN	NaN	NaN	NaN	+	+		+	1.54314	1.85776	0.956795	1.43257	G_I2_G_WT;G_PP1_G_WT;S_PP1_S_WT	conserved Plasmodium protein, unknown function	PBANKA_1243900.1-p1	11	11	6.9	6.9	6.9	176.43	0	64.188	341930000
NaN	NaN	NaN	NaN	NaN	24.2531	24.2335	24.0359	23.8578	23.8863	23.5316	23.8354	24.0132	24.2199	24.1531	NaN	NaN	NaN	NaN	NaN	23.8785	24.5901	23.7147	23.9786	NaN	NaN	NaN	NaN	NaN	NaN	+			+	-1.25089	0.102686	0	1.63028	G_I2_G_WT;S_PP1_S_WT	dihydrolipoyl dehydrogenase, mitochondrial, putative	PBANKA_1446900.1-p1	8	8	21.1	21.1	21.1	57.783	0	22.149	227700000
26.4058	26.913	26.1089	26.514	26.9007	27.4545	27.2686	27.7042	27.7459	27.7174	26.6444	26.772	27.2542	27.3589	27.1765	26.724	26.3557	26.4196	27.3318	25.8621	28.5012	29.3455	29.5309	29.3311	29.3841	27.5547	26.9135	28.0952	27.563	27.8953				+	-0.472743	0.536898	-1.06572	1.61421	S_PP1_S_WT	40S ribosomal protein S15, putative	PBANKA_1135100.1-p1	10	10	57.6	57.6	57.6	17.257	0	133.12	5504100000
NaN	NaN	NaN	NaN	NaN	25.0556	24.812	24.9636	24.9505	24.8416	24.0378	NaN	23.8754	23.5871	NaN	NaN	NaN	NaN	NaN	NaN	NaN	NaN	NaN	NaN	NaN	NaN	NaN	NaN	NaN	NaN		+			-0.91017	1.85651	0	0	G_PP1_G_WT	dynactin subunit 2, putative	PBANKA_1358900.1-p1	7	7	14.3	14.3	14.3	85.235	0	15.082	237090000
NaN	NaN	NaN	NaN	NaN	23.7782	24.7469	24.704	23.5641	23.9697	NaN	NaN	NaN	NaN	NaN	NaN	NaN	NaN	NaN	NaN	NaN	24.9723	25.2201	25.0101	24.9872	23.9735	NaN	NaN	NaN	NaN		+		+	0	1.85303	0.379369	2.22455	G_PP1_G_WT;S_PP1_S_WT	DNA-directed RNA polymerases I, II, and III subunit RPABC3, puta	PBANKA_1429500.1-p1	4	4	27.3	27.3	27.3	16.482	0	15.657	301740000
NaN	NaN	NaN	NaN	NaN	25.9551	24.7987	25.2008	25.5735	25.5996	23.3357	23.5495	23.9162	23.5464	23.5334	NaN	NaN	NaN	NaN	NaN	NaN	21.2746	NaN	NaN	NaN	NaN	NaN	NaN	NaN	NaN	+	+			-1.33629	1.84932	0	-0.560986	G_I2_G_WT;G_PP1_G_WT	6-cysteine protein	PBANKA_0306100.1-p1	16	16	7	7	7	320.02	0	33.662	330580000
NaN	23.4086	23.976	NaN	23.759	25.9425	25.4843	26.2953	26.146	25.412	24.0463	23.7229	24.5962	24.177	23.5318	NaN	NaN	NaN	NaN	NaN	NaN	23.245	NaN	22.1488	24.7538	NaN	NaN	NaN	NaN	21.7409		+			-0.994431	1.84117	-0.426626	0.550751	G_PP1_G_WT	origin recognition complex subunit 5, putative	PBANKA_0312500.1-p1	13	13	18.4	18.4	18.4	94.44	0	58.706	518200000
NaN	NaN	NaN	NaN	NaN	24.696	24.6322	24.7996	24.6086	23.3765	22.6799	22.9011	22.5671	22.6122	22.1783	NaN	NaN	NaN	NaN	NaN	NaN	NaN	22.2647	21.4849	21.3383	NaN	NaN	NaN	NaN	NaN		+			0.0406075	1.83486	0	-0.463197	G_PP1_G_WT	conserved Plasmodium protein, unknown function	PBANKA_1331300.1-p1	8	8	5.5	5.5	5.5	223	0	13.534	181170000
24.0439	25.4385	23.8083	24.8427	24.8484	26.7429	26.7554	26.7729	26.8709	26.948	26.1945	26.366	26.3438	26.3457	26.5024	NaN	25.4008	25.0376	26.828	25.0229	28.2145	28.8608	29.0552	28.9537	29.0101	27.6991	26.4478	27.2358	27.2815	27.5637	+		+	+	-1.75408	0.467586	-2.00139	1.57326	G_I2_G_WT;S_I2_S_WT;S_PP1_S_WT	60S ribosomal protein L11a, putative	PBANKA_0617100.1-p1	7	7	39.9	39.9	39.9	20.252	0	115.45	3670200000
NaN	NaN	NaN	NaN	NaN	23.9617	23.9098	23.9085	23.5982	23.944	22.0899	23.0396	NaN	NaN	NaN	NaN	NaN	NaN	NaN	NaN	NaN	NaN	NaN	NaN	NaN	NaN	NaN	NaN	NaN	NaN		+			0.854821	1.83166	0	0	G_PP1_G_WT	origin recognition complex subunit 1, putative	PBANKA_0602000.1-p1	5	5	5.2	5.2	5.2	120.49	0	6.7983	115680000
NaN	NaN	NaN	NaN	NaN	24.5277	23.7576	24.0759	24.1914	23.9054	NaN	NaN	NaN	23.4761	NaN	NaN	NaN	NaN	NaN	NaN	NaN	NaN	NaN	NaN	NaN	NaN	NaN	NaN	NaN	NaN		+			-0.037355	1.82992	0	0	G_PP1_G_WT	condensin-2 complex subunit H2, putative	PBANKA_0301800.1-p1	6	6	8.9	8.9	8.9	92.28	0	7.8684	126810000
24.829	26.7923	25.8661	25.4096	26.8258	28.8443	28.6208	28.7198	28.8355	28.6564	26.519	26.8733	27.1678	27.0835	26.9168	NaN	24.1822	24.4768	23.1348	24.4806	26.4893	26.5301	26.8094	26.6095	26.5289	25.5254	25.3066	25.2587	25.6607	26.4501		+	+		-0.967563	1.82325	-1.65787	0.953157	G_PP1_G_WT;S_I2_S_WT	replication factor C subunit 2, putative	PBANKA_0314700.1-p1	16	16	58.2	58.2	58.2	37.67	0	323.31	3996000000
23.9678	22.9072	NaN	NaN	23.3516	27.8335	26.2389	27.0694	27.298	27.2062	24.8932	24.6166	26.2315	25.8541	24.9384	NaN	NaN	NaN	NaN	NaN	23.766	21.5055	22.6932	23.5425	22.6927	23.6013	21.4912	23.8515	22.5821	23.4055	+	+			-2.23465	1.82244	-0.69631	-0.146319	G_I2_G_WT;G_PP1_G_WT	conserved Plasmodium protein, unknown function	PBANKA_1417900.1-p1	23	23	24	24	24	124.13	0	230.3	1149200000
NaN	NaN	NaN	NaN	NaN	24.3227	NaN	23.8971	24.3926	NaN	NaN	NaN	NaN	NaN	NaN	25.3663	25.3992	25.9026	25.6889	26.6228	25.8965	25.7086	26.2703	26.2583	26.4446	26.0008	24.8496	25.4945	25.9434	25.931		+			0	1.81796	0.152081	0.471815	G_PP1_G_WT	reticulocyte binding protein, putative	PBANKA_0100400.1-p1	13	4	27.7	27.7	10.4	72.085	0	90.74	745520000
NaN	23.5216	NaN	NaN	23.3809	23.7478	23.7933	23.4477	23.5727	23.4218	23.3691	23.7903	23.7995	23.7682	23.9003	23.8425	23.2577	24.2648	23.7306	24.2826	24.1496	23.457	24.4833	24.4817	24.5213	NaN	NaN	23.7865	24.1637	NaN	+			+	-1.10191	-0.128836	1.20038	1.54334	G_I2_G_WT;S_PP1_S_WT	EH domain-containing protein, putative	PBANKA_0402800.1-p1	9	9	24.4	24.4	24.4	61.595	0	31.886	290830000
NaN	NaN	NaN	NaN	NaN	25.3659	25.1997	25.262	25.1962	25.2034	NaN	24.0493	24.724	24.6334	NaN	NaN	NaN	NaN	NaN	NaN	NaN	NaN	NaN	NaN	NaN	NaN	NaN	NaN	NaN	NaN		+			-1.15047	1.8087	0	0	G_PP1_G_WT	conserved Plasmodium protein, unknown function	PBANKA_1213200.1-p1	5	5	7.9	7.9	7.9	97.766	0	8.4638	324810000
NaN	NaN	NaN	NaN	NaN	25.0879	24.5986	25.4975	25.531	25.4238	23.5469	23.6044	23.5873	23.277	23.1077	NaN	NaN	NaN	NaN	NaN	23.8006	25.2732	25.334	25.2926	25.1189	NaN	23.0503	23.4815	23.4314	23.4512	+	+		+	-0.978308	1.80314	-0.449206	1.97532	G_I2_G_WT;G_PP1_G_WT;S_PP1_S_WT	AP-1 complex subunit mu-1, putative	PBANKA_1409900.1-p1	6	5	18.3	18.3	16.1	52.909	0	13.998	449740000
26.4686	26.9392	26.6523	26.3553	26.6403	26.926	26.7512	26.8061	27.0932	27.1164	26.8067	26.7469	27.0191	27.2456	26.9109	27.4368	27.6026	27.3568	28.1339	27.1616	28.255	28.0481	28.5302	28.5342	28.4315	26.9345	25.8738	27.2148	27.6538	26.5309				+	-0.334705	-0.00726166	0.696814	1.51826	S_PP1_S_WT	40S ribosomal protein S18, putative	PBANKA_0922100.1-p1	6	5	50	50	44.9	17.882	0	77.423	4055200000
24.6423	26.7725	NaN	NaN	25.4174	26.1225	26.1332	25.9988	26.062	25.7229	25.3304	25.0668	26.2189	25.6116	25.6187	25.7119	25.3681	24.6771	24.3304	25.0176	27.526	27.3089	27.5951	27.4989	27.4683	26.2833	25.2241	26.2269	26.5868	25.5189				+	-1.36139	0.438584	-0.946959	1.51145	S_PP1_S_WT	60 kDa chaperonin, putative	PBANKA_1446800.1-p1	20	20	39.5	39.5	39.5	79.832	0	266.4	1747800000
23.0293	26.0233	24.3143	24.8502	26.1473	27.9071	27.274	28.0143	27.9217	27.7526	25.7902	25.6918	26.218	26.1659	25.9916	24.9724	23.5055	23.6959	25.2399	25.0599	26.3275	27.14	27.456	27.5964	27.3834	25.4653	25.0585	25.3897	25.5306	25.6486		+		+	-1.0986	1.80246	-0.923836	1.7621	G_PP1_G_WT;S_PP1_S_WT	eukaryotic translation initiation factor 3 subunit C, putative	PBANKA_0604800.1-p1	25	25	33.3	33.3	33.3	108.91	0	246.4	2627600000
24.814	25.2282	24.8008	23.3788	24.7307	25.2294	24.5727	24.8376	25.0401	25.3601	24.888	24.4995	25.5133	25.5847	24.9305	27.8062	27.7701	27.7279	27.7754	27.1744	26.8881	27.118	27.1673	26.6964	26.8381	25.4653	24.6132	25.6527	25.7786	25.6981			+	+	-0.492708	-0.07523	2.20921	1.49999	S_I2_S_WT;S_PP1_S_WT	40S ribosomal protein S25, putative	PBANKA_1022000.1-p1	7	7	42.9	42.9	42.9	11.796	0	17.187	1882800000
NaN	NaN	NaN	NaN	24.2879	26.1619	26.2903	26.4694	26.5438	26.1905	24.4641	24.4562	24.6582	24.688	24.4023	23.7487	NaN	NaN	24.1995	NaN	24.5225	24.9355	25.614	25.6152	25.7812	NaN	NaN	26.3111	24.4548	NaN	+	+		+	-1.36328	1.79742	-0.524538	1.90258	G_I2_G_WT;G_PP1_G_WT;S_PP1_S_WT	phosphoglucomutase-2	PBANKA_0715500.1-p1	6	6	25.5	25.5	25.5	34.968	0	16.156	891680000
28.5388	28.3144	27.2347	27.856	27.6606	29.0858	29.7641	29.0741	28.8442	28.9537	27.4203	27.2914	27.3619	27.5746	27.0957	27.2322	27.2269	27.2631	27.7909	27.6735	28.1028	27.9243	28.1779	28.433	28.2937	27.614	26.9489	27.8598	28.0309	27.3394		+			0.57214	1.79561	-0.121258	0.627759	G_PP1_G_WT	thioredoxin-related protein, putative	PBANKA_1365200.1-p1	5	5	28.6	28.6	28.6	23.633	0	126.46	7675900000
25.0809	24.8863	NaN	25.53	25.1837	26.4207	26.0111	26.3483	26.461	25.8898	25.3065	25.7008	25.7099	25.6735	25.9109	25.8264	25.8771	25.6192	25.4351	26.0937	27.4125	28.2913	28.1616	28.0323	28.5795	26.4248	26.2125	27.054	26.5709	26.7856				+	-1.13696	0.56584	-0.839267	1.48588	S_PP1_S_WT	serine/arginine-rich splicing factor 1, putative	PBANKA_1232100.1-p1	9	9	32.4	32.4	32.4	36.273	0	24.86	2418700000
25.9685	26.8051	25.0543	26.8572	26.906	27.9796	27.7214	27.7657	27.7407	27.8038	25.9908	25.9401	26.1161	26.2103	25.7815	23.1494	24.5782	24.7016	25.9276	25.5267	24.9931	25.6332	26.1435	26.1974	26.2649	23.5804	24.6887	24.7941	24.7507	25.9381		+			0.310469	1.79446	0.0263165	1.09604	G_PP1_G_WT	calcium-dependent protein kinase 1	PBANKA_0314200.1-p1	17	17	35	35	35	60.809	0	69.062	2342300000
NaN	NaN	NaN	NaN	NaN	24.6122	24.5774	24.6208	24.4807	24.3841	NaN	23.3855	23.8651	23.7873	NaN	NaN	NaN	NaN	NaN	NaN	24.4586	24.6334	25.1243	25.0153	24.9633	24.3328	23.9166	24.2713	24.0366	24.4994		+			0.0410591	1.77697	-1.35178	0.627657	G_PP1_G_WT	E3 ubiquitin-protein ligase, putative	PBANKA_0804900.1-p1	9	9	12.4	12.4	12.4	106.73	0	49.1	380780000
NaN	NaN	NaN	NaN	NaN	24.12	23.8808	24.5707	24.2792	24.1516	NaN	NaN	23.2379	NaN	NaN	NaN	NaN	NaN	NaN	NaN	NaN	NaN	NaN	NaN	NaN	NaN	NaN	NaN	NaN	NaN		+			0.470108	1.7756	0	0	G_PP1_G_WT	steroid dehydrogenase, putative	PBANKA_0522400.1-p1	3	3	7.8	7.8	7.8	37.14	0	3.743	144340000
26.3034	26.626	25.7616	26.2598	26.4031	27.3519	27.3143	27.568	27.793	27.5589	27.1012	26.971	27.2303	27.1437	27.239	27.5748	27.7845	27.3058	27.9106	27.435	28.4122	29.0751	29.3417	28.9913	29.1436	27.4979	26.6281	27.6976	27.9795	27.8613	+			+	-0.866289	0.380158	0.069249	1.4599	G_I2_G_WT;S_PP1_S_WT	40S ribosomal protein S4, putative	PBANKA_0941500.1-p1	10	10	44.1	44.1	44.1	29.844	0	34.645	5582000000
NaN	NaN	NaN	NaN	NaN	23.9529	NaN	24.0301	23.7679	24.2082	23.6793	24.2826	23.7574	23.7519	23.7842	NaN	NaN	NaN	NaN	NaN	24.4961	24.7047	24.5988	24.4645	25.0767	24.0498	NaN	NaN	24.741	24.1775	+				-1.30171	-0.518825	-0.540208	1.4528	G_I2_G_WT	DnaJ protein, putative	PBANKA_1224200.1-p1	10	10	14.2	14.2	14.2	92.771	0	20.76	299710000
NaN	NaN	NaN	NaN	NaN	25.1561	26.3133	25.5619	26.1618	25.184	23.7118	24.2259	23.9046	23.7809	23.939	NaN	NaN	NaN	NaN	NaN	NaN	NaN	NaN	NaN	23.6749	NaN	NaN	NaN	NaN	NaN	+	+			-1.30006	1.76299	0	0.147221	G_I2_G_WT;G_PP1_G_WT	conserved Plasmodium protein, unknown function	PBANKA_1026300.1-p1	10	10	18.3	18.3	18.3	76.748	0	13.405	448630000
NaN	NaN	NaN	NaN	NaN	23.5099	23.4942	24.2757	23.771	22.9183	NaN	NaN	NaN	NaN	NaN	NaN	NaN	NaN	NaN	NaN	24.005	26.0458	26.5935	26.3397	26.3955	23.3153	NaN	NaN	NaN	NaN		+		+	0	1.76288	0.576133	3.77888	G_PP1_G_WT;S_PP1_S_WT	60S ribosomal protein L32, putative	PBANKA_0417500.1-p1	3	3	26.7	26.7	26.7	15.523	0	12.962	435660000
NaN	NaN	NaN	NaN	NaN	23.8724	23.8845	23.7465	24.094	23.8601	NaN	NaN	NaN	NaN	NaN	NaN	NaN	NaN	NaN	NaN	NaN	NaN	23.6069	24.1238	NaN	NaN	NaN	NaN	NaN	NaN		+			0	1.76246	0	0.332498	G_PP1_G_WT	conserved Plasmodium protein, unknown function	PBANKA_1119300.1-p1	3	3	24.2	24.2	24.2	15.3	0	3.7403	158720000
NaN	NaN	NaN	NaN	NaN	25.0398	25.1907	25.054	26.0704	25.8395	23.5738	23.685	23.7291	23.6696	23.8048	NaN	NaN	NaN	NaN	NaN	23.699	NaN	23.7884	NaN	23.4966	NaN	NaN	NaN	NaN	23.3773		+			-0.771062	1.74641	-0.357203	0.387495	G_PP1_G_WT	zinc finger protein, putative	PBANKA_1435200.1-p1	7	7	22.1	22.1	22.1	55.783	0	323.31	419040000
NaN	NaN	NaN	NaN	NaN	24.5569	24.2684	23.9459	23.7782	23.7948	NaN	23.5373	23.6068	NaN	NaN	NaN	NaN	NaN	NaN	NaN	NaN	NaN	NaN	NaN	NaN	NaN	NaN	NaN	NaN	NaN		+			0.238021	1.73779	0	0	G_PP1_G_WT	conserved Plasmodium protein, unknown function	PBANKA_1337500.1-p1	11	11	4.8	4.8	4.8	373.28	0	22.841	156930000
24.703	NaN	24.361	24.9489	24.834	24.967	24.721	24.966	25.0869	24.5191	23.8366	24.4742	24.0823	24.681	24.6958	NaN	NaN	24.0275	24.3715	23.9915	25.5624	NaN	25.662	25.5949	NaN	23.8038	NaN	NaN	24.6792	NaN					-0.0653107	0.498028	0.410812	1.4207		60S acidic ribosomal protein P1, putative	PBANKA_0943600.1-p1	5	5	66.4	66.4	66.4	12.898	0	58.99	549730000
25.4433	26.2846	25.5111	26.0043	26.2575	27.556	27.3624	27.4305	27.3438	27.4321	25.7377	25.257	26.2063	25.7845	25.4668	24.3381	23.5496	24.3882	24.2845	23.7568	25.2719	25.3203	26.0744	25.8598	25.9292	23.628	23.4628	24.657	24.2945	24.8682		+		+	0.209684	1.73455	-0.118634	1.50905	G_PP1_G_WT;S_PP1_S_WT	replication factor C subunit 5, putative	PBANKA_0936500.1-p1	8	8	25.8	25.8	25.8	40.517	0	37.244	1812100000
24.4655	24.8431	24.9949	NaN	24.4774	24.2696	24.6688	24.4408	24.6539	24.283	23.9765	24.0767	NaN	NaN	NaN	26.1372	26.4861	25.6795	26.2913	25.9339	26.0165	25.6447	25.8793	25.9915	25.8237	26.0922	26.3373	26.2372	25.4667	26.5869	+	+			1.52477	1.72303	-0.0384865	-0.272908	G_I2_G_WT;G_PP1_G_WT	MORN repeat-containing protein 1, putative	PBANKA_0515200.1-p1	13	13	47.3	47.3	47.3	41.213	0	153.7	878190000
26.8783	27.715	26.5894	26.3123	27.0461	26.5217	26.9754	26.3163	26.3344	25.8152	27.0279	26.4391	27.425	27.0122	25.8052	26.4699	25.2231	25.4983	27.5754	25.5576	25.7362	27.0668	26.3041	26.4193	26.391	26.0587	24.1513	25.0819	24.9762	24.6469				+	0.166347	-0.349273	1.08187	1.40047	S_PP1_S_WT	histone H2B, putative	PBANKA_0941800.1-p1	4	4	34.7	34.7	34.7	13.257	0	34.841	2119400000
25.5848	26.2691	24.769	24.9911	24.7878	26.7829	26.4671	26.5262	26.9045	26.8485	26.2361	26.1039	26.7192	26.7685	26.5875	26.5812	26.4414	25.4968	27.4852	25.6536	27.7123	28.6002	28.6244	28.5996	28.8934	27.2196	26.089	27.5266	27.6426	26.9703	+			+	-1.20268	0.222821	-0.757964	1.39639	G_I2_G_WT;S_PP1_S_WT	40S ribosomal protein S17, putative	PBANKA_1456100.1-p1	12	12	56.9	56.9	56.9	16.078	0	79.665	3477700000
NaN	NaN	NaN	NaN	NaN	24.3774	24.0106	24.2191	24.5732	24.1082	22.4939	22.467	22.5664	22.4973	22.686	NaN	NaN	NaN	NaN	NaN	NaN	NaN	22.6946	22.6808	22.5493	NaN	22.3938	22.6759	22.4017	NaN		+			-0.0581264	1.7156	-0.658363	-0.236563	G_PP1_G_WT	TLD domain-containing protein	PBANKA_0820700.1-p1	6	6	7.4	7.4	7.4	117.28	0	14.926	164690000
NaN	NaN	NaN	NaN	NaN	23.6366	23.3944	23.6866	23.7046	23.492	NaN	NaN	NaN	NaN	NaN	NaN	NaN	NaN	NaN	NaN	NaN	NaN	23.55	NaN	23.6405	NaN	NaN	NaN	NaN	NaN		+			0	1.71485	0	0.711115	G_PP1_G_WT	HAD superfamily protein, putative	PBANKA_0401800.1-p1	6	6	7.2	7.2	7.2	126.5	0	8.114	134800000
NaN	NaN	NaN	NaN	NaN	25.7002	25.5631	25.6176	25.5632	25.5972	23.7523	23.8552	24.1054	23.7979	23.9665	NaN	NaN	NaN	NaN	NaN	25.3687	25.8625	26.181	25.9918	26.0576	24.3374	24.145	24.3659	24.353	25.2215	+	+	+	+	-1.41971	1.71283	-1.89814	1.40774	G_I2_G_WT;G_PP1_G_WT;S_I2_S_WT;S_PP1_S_WT	eukaryotic initiation factor 4A-III, putative	PBANKA_0523100.1-p1	9	9	34.6	34.6	34.6	44.683	0	32.028	751040000
23.9653	23.7838	23.5476	23.6014	26.7667	29.2996	28.6931	29.5146	29.0731	29.4154	27.0223	27.2891	27.9779	27.9963	27.1767	NaN	NaN	21.3858	NaN	20.354	21.3444	20.4016	22.8818	22.1952	22.857	20.8796	NaN	23.03	23.865	21.7596	+	+			-3.15951	1.70668	-0.391656	-0.331689	G_I2_G_WT;G_PP1_G_WT	LCCL domain-containing protein, putative	PBANKA_0204500.1-p1	34	34	35.9	35.9	35.9	121.56	0	323.31	4247700000
NaN	NaN	NaN	NaN	NaN	26.1462	25.8197	25.9451	25.9794	25.9179	23.9884	24.1216	24.5653	24.4078	24.2201	NaN	NaN	NaN	NaN	24.9212	25.3537	25.8517	26.0499	26.2399	26.0313	23.956	24.1604	24.6544	24.9407	24.381	+	+		+	-2.06234	1.701	-1.49331	1.4868	G_I2_G_WT;G_PP1_G_WT;S_PP1_S_WT	coatomer subunit delta, putative	PBANKA_0913700.1-p1	11	11	30.4	30.4	30.4	57.497	0	95.306	835770000
NaN	NaN	NaN	NaN	NaN	25.4375	25.1497	25.5075	25.2056	25.1715	24.0984	24.0286	23.8986	24.0144	NaN	NaN	NaN	NaN	NaN	NaN	24.0098	24.4748	24.5826	24.4532	24.5025	NaN	25.0545	NaN	25.2894	NaN		+			-0.998828	1.69794	-0.979179	0.965339	G_PP1_G_WT	serine/threonine protein kinase, putative	PBANKA_0401100.1-p1	13	13	12.7	12.7	12.7	153.65	0	69.919	454930000
NaN	NaN	NaN	NaN	NaN	23.2574	23.2285	23.1819	23.2669	23.321	22.7261	22.7706	23.1889	22.7642	22.7014	NaN	NaN	NaN	NaN	NaN	23.9256	24.0408	24.378	24.5315	24.6095	23.2263	NaN	24.0194	23.2098	22.5494				+	-0.0421116	0.420913	-0.516019	1.38068	S_PP1_S_WT	golgi protein 1, putative	PBANKA_1418300.1-p1	7	7	9.3	9.3	9.3	148.54	0	28.005	185730000
NaN	NaN	NaN	NaN	NaN	NaN	NaN	NaN	NaN	NaN	NaN	NaN	NaN	NaN	NaN	NaN	NaN	NaN	NaN	NaN	23.3637	23.179	23.8218	23.4621	23.6693	NaN	NaN	NaN	NaN	NaN				+	0	0	0	1.37307	S_PP1_S_WT	AP2 domain transcription factor, putative	PBANKA_0521700.1-p1	4	4	1.9	1.9	1.9	319.14	0	8.4914	52067000
NaN	NaN	NaN	NaN	NaN	24.5986	24.8535	24.474	24.3118	24.6375	23.9959	NaN	NaN	23.6254	NaN	NaN	NaN	NaN	NaN	NaN	NaN	NaN	NaN	NaN	NaN	NaN	NaN	NaN	NaN	NaN		+			-0.107005	1.69558	0	0	G_PP1_G_WT	leucine-rich repeat protein	PBANKA_0830900.1-p1	6	6	10.5	10.5	10.5	75.661	0	7.4888	198370000
31.2257	31.0029	30.4742	30.4342	31.3522	33.6593	32.904	33.5015	33.4347	33.3246	31.67	31.8255	31.821	31.4488	31.5835	31.2218	31.3405	31.3707	31.2919	30.8478	31.8719	31.9112	32.3727	32.3357	32.2256	31.0297	31.389	31.6105	31.2774	31.8124		+			-0.77193	1.69504	-0.209243	0.719645	G_PP1_G_WT	erythrocyte membrane-associated antigen, putative	PBANKA_0801200.1-p1	31	31	17.6	17.6	17.6	233.91	0	181.73	57357000000
NaN	NaN	NaN	NaN	NaN	NaN	21.9314	22.4054	21.8053	NaN	NaN	NaN	NaN	NaN	NaN	NaN	NaN	NaN	NaN	NaN	22.8058	22.8074	23.768	23.8179	23.919	NaN	NaN	22.2308	NaN	NaN				+	0	-0.00227699	0.00209045	1.36084	S_PP1_S_WT	60S ribosomal protein L7ae/L30e, putative	PBANKA_0721900.1-p1	3	3	21.8	21.8	21.8	27.456	0	4.172	80314000
27.2286	27.1818	25.9786	27.1002	27.0804	28.7122	28.4889	28.7641	28.7766	28.6755	27.1661	27.0088	27.1213	26.9598	26.8025	24.3983	NaN	25.0179	25.6434	25.6641	25.6423	25.4882	26.6225	25.9947	25.5531	24.9027	24.9159	24.5827	24.4033	25.6456		+			-0.0978039	1.67174	-0.481332	0.970102	G_PP1_G_WT	conserved Plasmodium protein, unknown function	PBANKA_0704700.1-p1	14	14	42.9	42.9	42.9	57.267	0	323.31	3997700000
NaN	NaN	NaN	NaN	NaN	24.912	24.5739	24.5781	24.5044	24.6312	NaN	23.6469	23.6131	23.6513	NaN	NaN	NaN	NaN	NaN	NaN	24.5416	24.8032	25.1658	25.2818	25.236	23.938	NaN	NaN	23.8352	24.2699		+		+	0.00174484	1.66583	-1.14093	1.7921	G_PP1_G_WT;S_PP1_S_WT	conserved Plasmodium protein, unknown function	PBANKA_1358700.1-p1	8	8	12.9	12.9	12.9	110.15	0	34.32	375620000
25.2953	25.9083	25.6275	24.757	25.2803	27.5014	26.9779	27.2132	27.2647	27.0179	25.6845	25.7259	25.5922	25.6772	24.97	23.3327	NaN	23.0783	23.6178	21.7059	23.3012	NaN	24.1632	22.8879	22.3416	24.7744	NaN	NaN	NaN	22.7654		+			-0.156256	1.66507	0.347983	0.231019	G_PP1_G_WT	structural maintenance of chromosomes protein 2, putative	PBANKA_1416900.1-p1	25	25	25.5	25.5	25.5	143.5	0	98.156	1256500000
NaN	NaN	NaN	NaN	NaN	23.5967	23.3981	23.1171	23.3013	23.4757	NaN	NaN	NaN	NaN	NaN	NaN	NaN	NaN	NaN	NaN	NaN	NaN	NaN	NaN	NaN	NaN	NaN	NaN	NaN	NaN		+			0	1.66359	0	0	G_PP1_G_WT	conserved Plasmodium protein, unknown function	PBANKA_0708200.1-p1	4	4	9.5	9.5	9.5	60.787	0	5.0069	69290000
26.4713	26.6428	26.3006	26.6225	26.3799	26.8651	26.3473	26.467	26.9185	26.7655	26.6302	26.4278	26.7848	27.0259	26.8611	27.2848	27.2171	27.0142	27.8862	27.3049	27.9399	27.5573	28.1449	28.0416	28.0304	26.6225	25.5586	26.6776	27.4184	26.7099				+	-0.262553	-0.0732746	0.744023	1.34538	S_PP1_S_WT	40S ribosomal protein S19, putative	PBANKA_0522800.1-p1	8	8	51.7	51.7	51.7	20.025	0	216.86	3298000000
25.947	26.3188	26.2365	25.9538	26.3858	26.9578	26.4423	26.8274	26.8286	26.6569	26.0874	26.2372	26.0653	26.017	26.414	24.7	24.1818	24.6878	24.0295	24.5191	24.0672	23.929	24.3325	24.158	23.7409	NaN	NaN	NaN	NaN	24.8176			+	+	0.00418167	0.578409	1.72106	1.34294	S_I2_S_WT;S_PP1_S_WT	WD repeat-containing protein, putative	PBANKA_0942400.1-p1	8	8	16.5	16.5	16.5	67.627	0	27.768	1328400000
NaN	NaN	NaN	NaN	NaN	24.2313	NaN	23.7208	23.5959	23.3584	22.814	22.7834	23.1243	22.9986	22.7874	24.0166	23.3754	24.2757	23.3158	24.4507	24.4475	25.0918	25.0431	25.4852	25.6605	23.5826	23.107	24.0309	24.5341	23.8178				+	-0.517131	0.582551	0.0723553	1.33116	S_PP1_S_WT	nucleoside transporter 1	PBANKA_1360100.1-p1	3	3	6.1	6.1	6.1	46.011	0	37.842	336760000
NaN	NaN	NaN	NaN	NaN	23.9299	23.8998	24.2173	24.146	NaN	23.7775	23.9931	23.8316	23.8922	24.1463	NaN	NaN	NaN	NaN	NaN	24.364	NaN	24.1214	NaN	NaN	NaN	NaN	NaN	NaN	NaN	+				-1.6075	-0.445003	0	1.32365	G_I2_G_WT	cGMP-dependent protein kinase	PBANKA_1008200.1-p1	12	12	20.2	20.2	20.2	97.9	0	15.535	192200000
NaN	24.5215	NaN	NaN	25.6357	27.4652	26.2765	27.1015	27.5914	27.254	26.3988	26.2763	26.9375	26.7982	26.5678	25.5251	22.6796	25.1886	25.2637	26.2237	26.737	27.954	28.0143	28.6041	28.5841	26.4366	26.0335	26.8719	27.3278	26.6146	+		+	+	-3.2153	0.541977	-1.68071	1.32184	G_I2_G_WT;S_I2_S_WT;S_PP1_S_WT	multidrug resistance protein 1, putative	PBANKA_1237800.1-p1	25	25	23.1	23.1	23.1	160.94	0	286.41	2905800000
NaN	NaN	NaN	NaN	NaN	NaN	NaN	NaN	22.756	NaN	22.7436	NaN	24.2062	NaN	NaN	27.0053	27.5139	27.713	27.7406	27.1994	28.3277	27.811	29.0159	28.6169	28.2078	27.3984	27.1477	26.9082	26.8232	27.0951				+	0.165439	-0.117243	0.359905	1.32135	S_PP1_S_WT	myosin E, putative	PBANKA_0112200.1-p1	31	31	27.3	27.3	27.3	228.36	0	233.67	2471800000
NaN	NaN	NaN	NaN	NaN	24.2025	24.3649	24.0218	24.1365	23.2812	22.499	22.5229	22.1314	22.168	22.3944	NaN	NaN	NaN	NaN	NaN	NaN	NaN	NaN	NaN	NaN	NaN	NaN	NaN	NaN	NaN		+			-0.347714	1.65826	0	0	G_PP1_G_WT	conserved Plasmodium protein, unknown function	PBANKA_1326100.1-p1	5	5	8.9	8.9	8.9	92.981	0	20.105	124580000
NaN	24.5459	24.4008	23.9904	25.049	27.8368	27.4373	27.8407	27.7767	27.7373	26.1805	26.1388	26.0317	26.3671	25.6434	23.1322	NaN	22.7398	NaN	NaN	26.3364	26.5402	27.2856	27.1011	27.4333	25.2797	25.0161	25.9566	25.9126	25.8039	+	+	+	+	-1.92353	1.65348	-3.125	1.34553	G_I2_G_WT;G_PP1_G_WT;S_I2_S_WT;S_PP1_S_WT	importin alpha re-exporter, putative	PBANKA_0833600.1-p1	27	27	27.4	27.4	27.4	153.3	0	323.31	2363500000
NaN	NaN	NaN	NaN	NaN	25.5963	25.3625	25.8598	25.8179	25.5246	23.264	24.6238	23.7934	23.6438	24.574	NaN	NaN	NaN	NaN	NaN	NaN	24.4777	24.6222	24.658	NaN	NaN	NaN	NaN	NaN	NaN	+	+			-1.72411	1.6524	0	1.154	G_I2_G_WT;G_PP1_G_WT	actin-related protein	PBANKA_0209300.1-p1	7	7	33.2	33.2	33.2	42.438	0	56.568	480470000
NaN	NaN	NaN	NaN	24.1185	24.7986	24.6092	24.6934	24.7671	24.6045	NaN	23.6478	23.4743	NaN	24.0907	24.5547	NaN	24.8403	24.8374	24.5447	25.0817	24.8055	25.6759	25.6759	25.3132	24.5806	24.2942	24.4477	24.1868	25.3225		+			-0.298805	1.64534	-0.208092	0.744065	G_PP1_G_WT	serine/threonine protein phosphatase 7	PBANKA_1020100.1-p1	13	13	17.3	17.3	17.3	111.57	0	49.944	600260000
22.9132	25.0175	23.0712	24.597	24.7636	26.6022	26.2443	26.3358	26.3062	26.6427	24.738	24.8161	25.159	24.7239	24.5171	24.5284	22.9523	24.4276	24.6037	23.7849	25.1434	25.5771	25.8078	25.7915	25.6772	24.0374	24.0413	24.3761	24.1211	24.6808		+		+	-0.71833	1.6354	-0.191978	1.34805	G_PP1_G_WT;S_PP1_S_WT	N-acetyltransferase, GNAT family, putative	PBANKA_0611800.1-p1	9	9	20.5	20.5	20.5	59.276	0	116.88	1041900000
NaN	NaN	NaN	NaN	NaN	25.4878	25.5018	25.3623	25.2249	25.565	NaN	23.9939	24.3844	24.299	24.3208	NaN	NaN	NaN	NaN	NaN	NaN	NaN	24.3343	NaN	24.3088	NaN	NaN	NaN	NaN	NaN	+	+			-1.18907	1.6282	0	0.954969	G_I2_G_WT;G_PP1_G_WT	cullin-1, putative	PBANKA_1426500.1-p1	10	10	14.3	14.3	14.3	100.88	0	20.982	387090000
27.0728	27.2391	26.9957	26.8972	26.8412	28.9388	28.572	28.8023	28.7135	28.7295	27.2677	27.2867	27.165	27.0345	26.9815	27.2487	27.329	27.307	27.5035	27.5165	28.1629	28.4731	28.7352	28.7625	28.7845	27.6453	27.2912	27.375	27.4266	27.6343		+		+	-0.137875	1.60412	-0.0935596	1.10916	G_PP1_G_WT;S_PP1_S_WT	26S protease regulatory subunit 8, putative	PBANKA_1461800.1-p1	25	19	60.7	60.7	48.6	48.007	0	323.31	6971100000
26.5933	26.3194	26.2598	26.5087	26.5593	28.0886	28.1117	28.1581	28.1912	28.0195	26.4675	26.5595	26.4758	26.7066	26.395	26.6139	26.4008	26.8398	26.8809	26.5261	27.7354	27.8856	28.2235	28.3507	28.2598	27.1593	26.909	26.8457	26.8763	27.3103		+		+	-0.0727806	1.59294	-0.367812	1.07092	G_PP1_G_WT;S_PP1_S_WT	26S protease regulatory subunit 6A, putative	PBANKA_0917900.1-p1	21	20	57	57	53.4	50.976	0	204.01	4428400000
24.6339	26.0195	25.1981	26.1656	26.4483	28.4384	28.0445	27.9351	28.1913	27.8767	26.4685	26.2661	26.9466	26.6075	26.2351	22.8625	22.9555	24.0842	24.5924	24.9395	23.6592	25.285	25.8725	25.4133	25.4745	NaN	NaN	20.4081	22.8684	24.7293		+		+	-0.811673	1.59244	1.34649	2.60053	G_PP1_G_WT;S_PP1_S_WT	DNA polymerase delta catalytic subunit, putative	PBANKA_0501300.1-p1	25	25	28.3	28.3	28.3	126.55	0	173.69	2502800000
24.4949	24.5351	NaN	24.8295	24.4413	27.0685	25.7959	26.3237	26.8976	26.6168	25.6869	25.8661	26.0338	26.2522	25.6575	24.1086	NaN	24.4278	24.1424	24.7748	24.8974	25.9539	25.9448	26.6759	26.6566	25.2633	NaN	25.6781	25.8979	25.15	+				-1.96618	0.641197	-0.850449	1.24968	G_I2_G_WT	voltage-dependent anion-selective channel protein, putative	PBANKA_1012800.1-p1	11	11	42.2	42.2	42.2	33.299	0	211.65	1361200000
NaN	24.5646	24.3722	24.3976	24.5273	27.5838	27.167	27.6229	27.798	27.2687	25.6803	25.4291	26.3357	26.582	25.4536	NaN	NaN	NaN	NaN	NaN	23.4953	22.6587	24.1893	23.9826	22.8316	NaN	NaN	NaN	NaN	NaN	+	+			-1.67641	1.59191	0	1.0139	G_I2_G_WT;G_PP1_G_WT	nucleoside diphosphate kinase, putative	PBANKA_0104400.1-p1	26	26	19.7	19.7	19.7	196.41	0	207.59	1478800000
NaN	NaN	NaN	24.0178	24.0995	25.7883	24.9254	25.3083	25.9037	25.4149	23.9514	24.0413	23.8713	23.8652	23.6521	23.9825	24.1283	24.936	24.1141	24.5094	25.3997	25.3983	25.8243	25.8241	26.1446	24.1116	24.0992	24.167	24.3757	24.4967		+		+	-0.82377	1.59187	0.084005	1.46815	G_PP1_G_WT;S_PP1_S_WT	coatomer subunit beta, putative	PBANKA_0415500.1-p1	11	11	16.3	16.3	16.3	116.6	0	55.706	736820000
NaN	NaN	NaN	NaN	NaN	24.4509	24.6494	24.7923	24.4348	24.6743	NaN	NaN	23.5747	23.42	23.4361	NaN	NaN	NaN	NaN	NaN	NaN	23.8167	23.812	24.1013	24.0429	NaN	NaN	NaN	NaN	NaN		+		+	-0.0847984	1.58938	0	1.39069	G_PP1_G_WT;S_PP1_S_WT	conserved Apicomplexan protein, unknown function	PBANKA_0109600.1-p1	7	7	31.1	31.1	31.1	33.483	0	28.311	256770000
24.8778	24.9907	24.1884	23.8102	25.06	26.7669	26.864	26.9813	26.9504	26.5922	25.359	24.8518	25.4576	25.3735	25.1666	NaN	NaN	NaN	23.2227	22.1443	23.5918	NaN	23.2942	NaN	NaN	NaN	NaN	NaN	NaN	24.055		+			-0.656261	1.58928	-0.126389	-0.46594	G_PP1_G_WT	perforin-like protein 2	PBANKA_1432400.1-p1	14	14	20.9	20.9	20.9	114.35	0	96.914	881120000
NaN	NaN	NaN	NaN	NaN	23.6916	23.4747	23.6021	23.4169	23.8543	22.7425	23.4444	23.1884	23.212	22.9025	NaN	NaN	23.5567	NaN	NaN	NaN	23.7193	23.5577	23.8899	23.7915	NaN	NaN	NaN	NaN	23.1157				+	-0.216699	0.509951	-0.059639	1.23176	S_PP1_S_WT	asparagine/aspartate rich protein, putative	PBANKA_1448200.1-p1	9	9	2.7	2.7	2.7	564.04	0	10.633	273500000
NaN	25.4814	25.1564	25.024	25.1684	27.041	26.7079	26.9357	26.9331	26.8624	25.491	25.4872	25.3277	25.2913	24.9613	25.8963	25.645	25.9134	25.6166	25.4621	26.3314	26.5792	26.8994	27.0297	27.1976	25.4794	25.3413	25.6578	25.4079	25.7787		+		+	-0.519489	1.58434	0.173685	1.27445	G_PP1_G_WT;S_PP1_S_WT	protein transport protein SEC31, putative	PBANKA_0311000.1-p1	17	17	15.6	15.6	15.6	156.63	0	177.18	1899300000
NaN	24.8078	NaN	24.318	24.8358	26.1721	25.9659	25.7782	25.6863	25.7855	25.5776	25.3665	25.7061	25.57	25.6604	25.9319	24.7176	25.6405	26.3663	25.9395	26.5471	26.9473	27.6383	27.3214	27.338	25.4441	25.6483	25.9637	26.2929	26.3073	+			+	-1.93138	0.301464	-0.212117	1.22714	G_I2_G_WT;S_PP1_S_WT	PRE-binding protein, putative	PBANKA_1210200.1-p1	25	25	28.8	28.8	28.8	111.2	0	123.34	1677900000
NaN	NaN	NaN	NaN	25.3322	25.267	25.2666	25.3569	25.2702	25.1639	23.7146	23.5543	23.9651	23.5385	23.6805	24.7307	24.2149	24.7627	25.1332	24.4133	24.7494	25.2526	25.4566	25.2643	25.4661	23.8132	23.7726	24.1544	23.9906	24.6189		+		+	-0.304057	1.57434	0.581014	1.16787	G_PP1_G_WT;S_PP1_S_WT	cysteine desulfurase, putative	PBANKA_0211300.1-p1	10	10	23.5	23.5	23.5	61.675	0	17.184	656880000
NaN	NaN	NaN	NaN	NaN	21.652	22.0573	21.8318	NaN	21.3962	NaN	NaN	NaN	NaN	NaN	NaN	NaN	NaN	NaN	NaN	22.0358	23.3864	23.0742	23.4737	23.4462	NaN	NaN	NaN	22.2148	22.1114				+	0	-0.61386	0.598366	1.2237	S_PP1_S_WT	ATP-dependent protease ATPase subunit ClpY, putative	PBANKA_0808900.1-p1	3	3	6.3	6.3	6.3	89.552	0	10.045	64611000
NaN	NaN	NaN	NaN	NaN	24.4114	23.886	24.7085	24.0915	23.9576	23.0527	NaN	23.0564	23.3166	NaN	NaN	NaN	NaN	NaN	NaN	23.7976	24.2423	24.5183	24.8211	24.5308	NaN	23.712	23.9621	NaN	24.4616		+			-0.228542	1.57414	-0.963632	1.34903	G_PP1_G_WT	conserved Plasmodium protein, unknown function	PBANKA_0205200.1-p1	6	6	3.6	3.6	3.6	214.96	0	12.641	291050000
NaN	NaN	NaN	NaN	NaN	NaN	NaN	NaN	NaN	NaN	NaN	NaN	24.0444	NaN	NaN	24.882	24.969	25.2611	25.0627	25.9236	25.8883	25.9704	26.53	26.4701	26.5921	25.0611	24.9693	25.1692	25.4904	24.7821				+	0.348762	-0.267323	0.125269	1.19574	S_PP1_S_WT	apical membrane antigen 1	PBANKA_0915000.1-p1	8	8	18	18	18	63.749	0	143.98	616990000
27.6664	27.7967	27.7449	28.1805	28.0403	28.7088	27.7383	27.9554	28.1359	28.1761	28.5649	28.6027	28.7044	28.9669	28.6357	25.5811	24.8287	26.4483	25.2478	26.6968	26.2754	25.7119	25.8887	26.4094	26.673	25.5837	NaN	25.0214	26.4871	25.9038	+				-0.809169	-0.551983	0.749628	1.18076	G_I2_G_WT	replication protein A1, small fragment	PBANKA_0416600.1-p1	21	21	40.9	40.9	40.9	56.538	0	134.88	4358400000
NaN	NaN	NaN	NaN	NaN	25.3511	24.1016	24.4953	25.0234	25.1065	23.7397	23.8991	23.7919	NaN	23.6965	NaN	NaN	NaN	NaN	NaN	NaN	NaN	NaN	NaN	24.4658	NaN	NaN	NaN	NaN	NaN		+			-0.578438	1.55724	0	0.11131	G_PP1_G_WT	conserved protein, unknown function	PBANKA_1302500.1-p1	4	4	13.8	13.8	13.8	35.656	0	5.7498	311370000
NaN	NaN	NaN	NaN	NaN	NaN	20.4697	NaN	NaN	NaN	20.6059	20.2897	21.0551	20.7591	NaN	NaN	NaN	NaN	NaN	NaN	21.4249	24.3426	22.2305	23.0312	21.717	21.0703	NaN	21.3229	NaN	20.9746					0.780808	0.555319	0.644162	1.16553		60S ribosomal protein L23, putative	PBANKA_1338600.1-p1	2	2	7.2	7.2	7.2	20.691	0	21.781	79362000
NaN	NaN	NaN	NaN	22.9608	23.5165	23.9138	NaN	23.7325	23.5588	23.6116	23.6975	23.9709	24.4744	23.7721	24.1978	NaN	NaN	25.4883	23.8548	24.5106	24.8813	24.9639	24.9634	25.0209	24.3088	23.2637	23.7201	24.8521	NaN	+				-1.64496	-0.683325	-0.0143044	1.16533	G_I2_G_WT	histone H2B variant, putative	PBANKA_1420600.1-p1	3	3	27.6	27.6	27.6	13.749	0	4.2705	395680000
NaN	NaN	NaN	NaN	NaN	25.5684	24.9143	25.6454	25.5876	25.2674	23.8412	24.1123	23.8404	23.5954	23.8298	NaN	NaN	NaN	NaN	NaN	24.1434	24.9775	25.3084	25.1106	25.4773	NaN	22.8436	23.09	NaN	24.1666	+	+		+	-1.13401	1.55283	-0.363233	2.29909	G_I2_G_WT;G_PP1_G_WT;S_PP1_S_WT	AP-1 complex subunit beta, putative	PBANKA_1242700.1-p1	12	12	16.9	16.9	16.9	107.2	0	39.035	513050000
NaN	NaN	NaN	NaN	NaN	23.7376	24.5336	24.2081	24.638	24.2591	24.6734	24.2454	24.4203	25.0103	24.9364	NaN	NaN	NaN	NaN	NaN	24.7909	26.0066	26.1631	25.7294	25.9914	24.2574	NaN	24.8617	25.3879	24.5927	+		+		-2.08169	-0.381868	-2.12899	1.16284	G_I2_G_WT;S_I2_S_WT	40S ribosomal protein S6, putative	PBANKA_1355100.1-p1	6	6	23.5	23.5	23.5	35.469	0	29.233	519370000
23.7626	23.701	23.1225	NaN	23.7061	24.5283	24.1481	24.2302	24.4677	24.4311	23.9721	24.3988	24.3781	24.0191	23.9707	23.8014	23.55	23.5548	23.464	23.9597	23.5753	23.2588	24.2078	24.1469	24.0637	23.7646	NaN	23.6783	NaN	23.8823					-0.618505	0.213298	0.976685	1.16118		PPPDE peptidase domain-containing protein, putative	PBANKA_1433500.1-p1	7	7	18.3	18.3	18.3	47.458	0	70.497	375870000
NaN	NaN	NaN	NaN	NaN	25.4207	22.8907	23.9572	24.6678	23.8886	23.5939	22.9666	22.9221	22.424	NaN	27.8653	27.0918	27.4811	28.9436	28.408	28.5841	28.7322	29.0128	29.1188	29.2117	28.2194	27.4192	27.9511	28.3852	27.7496		+			-0.287894	1.54682	0.0130432	0.987024	G_PP1_G_WT	rhoptry-associated protein 1	PBANKA_1032100.1-p1	24	24	48.8	48.8	48.8	70.686	0	323.31	4102800000
NaN	NaN	NaN	NaN	NaN	24.0924	NaN	23.927	23.647	24.0144	NaN	NaN	23.457	NaN	NaN	NaN	NaN	NaN	NaN	NaN	24.4116	24.2417	24.3604	24.6113	24.8882	NaN	NaN	NaN	NaN	24.3898		+		+	0.611837	1.53927	0.115574	2.0164	G_PP1_G_WT;S_PP1_S_WT	tRNA-splicing ligase RtcB, putative	PBANKA_0941200.1-p1	4	4	14.6	14.6	14.6	56.31	0	15.798	711650000
26.0942	26.9536	25.0317	25.9452	26.8603	28.7217	28.2995	28.4173	28.614	28.5119	26.9124	26.5386	27.2496	27.2312	26.9362	24.0111	NaN	23.0718	23.4209	23.6593	24.9514	25.2396	26.3257	25.7953	25.825	23.4233	22.1781	23.4902	23.1503	24.0746		+		+	-0.796585	1.53926	-0.172379	2.36409	G_PP1_G_WT;S_PP1_S_WT	phosphoglycerate mutase, putative	PBANKA_0408400.1-p1	33	33	34.9	34.9	34.9	126.18	0	323.31	3220900000
25.8879	28.1414	25.5519	25.3543	28.0397	29.0624	27.9037	28.8296	28.6237	28.5306	26.6313	26.8167	27.4699	27.4528	26.8962	24.9446	22.9786	21.778	24.6074	22.3385	25.9183	26.3268	26.8781	26.8195	26.6674	25.1683	23.0201	25.22	26.1716	25.6806		+		+	-0.458333	1.53665	-1.72273	1.46986	G_PP1_G_WT;S_PP1_S_WT	FACT complex subunit SPT16	PBANKA_1232200.1-p1	39	39	43.6	43.6	43.6	127.56	0	323.31	3950900000
26.774	27.3457	26.7227	26.9967	27.4287	28.733	28.902	28.8802	28.8234	28.8723	27.2621	27.3537	27.3518	27.282	27.28	27.3304	27.3719	27.2463	27.6794	27.1923	28.3438	28.3246	28.7318	28.6408	28.5772	27.4741	27.2559	27.3158	27.7056	27.8159		+		+	-0.252353	1.53626	-0.149411	1.01017	G_PP1_G_WT;S_PP1_S_WT	26S proteasome regulatory subunit RPN1, putative	PBANKA_0303600.1-p1	26	26	38.6	38.6	38.6	110.7	0	323.31	6712400000
NaN	NaN	NaN	NaN	NaN	23.2548	23.1168	23.063	23.008	23.2887	NaN	NaN	23.0568	23.0649	23.1885	NaN	NaN	NaN	NaN	NaN	23.4654	NaN	23.5414	23.5641	23.7339	NaN	NaN	NaN	NaN	NaN					-0.302199	0.577592	0	1.13859		conserved Plasmodium protein, unknown function	PBANKA_1124800.1-p1	5	5	3.4	3.4	3.4	181.63	0	5.4912	142060000
NaN	NaN	NaN	NaN	NaN	NaN	NaN	NaN	NaN	NaN	NaN	NaN	NaN	NaN	NaN	NaN	NaN	NaN	NaN	NaN	24.6502	24.5724	25.028	24.6017	24.8522	24.6686	NaN	24.4353	24.807	NaN					0	0	-1.37275	1.13446		rhoptry neck protein 4	PBANKA_0932000.1-p1	6	6	14.8	14.8	14.8	88.828	0	33.529	198750000
NaN	NaN	NaN	NaN	NaN	24.7533	24.8922	24.332	24.6979	24.3475	23.8641	NaN	23.5482	23.93	NaN	NaN	NaN	NaN	NaN	NaN	NaN	NaN	NaN	NaN	NaN	NaN	NaN	NaN	NaN	NaN		+			-0.0489147	1.53162	0	0	G_PP1_G_WT	conserved Plasmodium protein, unknown function	PBANKA_0913600.1-p1	9	9	16.8	16.8	16.8	73.33	0	16.303	201360000
26.9094	27.5153	27.1123	26.7954	27.3885	28.5236	28.2271	28.5059	28.341	28.6259	26.981	26.9629	27.1408	26.7972	26.685	24.7922	24.9703	24.5157	25.3564	25.0946	24.7054	25.5298	26.6728	26.4842	26.0458	24.7155	22.9294	24.674	25.1828	26.1374		+			0.230787	1.5313	0.218036	1.15977	G_PP1_G_WT	DNA mismatch repair protein MSH6, putative	PBANKA_1105100.1-p1	34	34	32	32	32	142.65	0	323.31	3586500000
NaN	NaN	NaN	NaN	NaN	24.3422	24.1972	24.3877	24.3054	23.9481	NaN	NaN	23.5333	23.4042	NaN	NaN	NaN	NaN	NaN	NaN	NaN	NaN	NaN	NaN	NaN	NaN	NaN	NaN	NaN	NaN		+			-0.056181	1.52951	0	0	G_PP1_G_WT	conserved Plasmodium protein, unknown function	PBANKA_1308000.1-p1	9	9	1.5	1.5	1.5	792.26	0	12.993	148000000
NaN	25.0515	24.0125	25.5098	25.2257	26.2681	26.4748	26.5843	26.459	26.4908	24.9839	24.8308	24.9568	25.1374	24.7281	NaN	NaN	24.5139	23.9116	24.5729	23.7602	24.7016	25.3937	25.0404	24.7852	NaN	NaN	NaN	23.4967	23.32		+		+	-0.387852	1.52802	0.959987	2.26193	G_PP1_G_WT;S_PP1_S_WT	tubulin gamma chain, putative	PBANKA_1226600.1-p1	12	12	35	35	35	51.609	0	87.866	937000000
NaN	NaN	NaN	NaN	NaN	23.556	24.3607	23.6936	23.7119	24.0523	NaN	NaN	23.3003	23.1409	NaN	NaN	NaN	NaN	NaN	NaN	NaN	NaN	23.4353	23.1342	NaN	NaN	NaN	NaN	NaN	NaN		+			0.407718	1.5263	0	0.971111	G_PP1_G_WT	3-hydroxyisobutyryl-coenzyme A hydrolase, putative	PBANKA_1454400.1-p1	8	8	21.1	21.1	21.1	60.636	0	13.078	147890000
24.3056	25.2447	23.65	24.611	25.0824	25.5173	25.3038	25.2987	25.585	25.389	23.854	23.6146	23.9022	24.43	23.6765	NaN	NaN	NaN	NaN	22.9844	23.3752	22.864	23.5445	23.5759	NaN	NaN	NaN	NaN	NaN	23.2572		+			0.683276	1.52329	0.478763	1.01274	G_PP1_G_WT	glycogen synthase kinase 3, putative	PBANKA_0410400.1-p1	6	6	20	20	20	49.737	0	27.475	461400000
NaN	NaN	NaN	NaN	NaN	23.4326	23.889	23.7263	23.4671	23.6318	23.0742	22.9423	22.8189	NaN	NaN	NaN	NaN	NaN	NaN	NaN	24.0283	24.0131	24.2218	24.4037	24.4984	NaN	23.3088	23.7876	23.8483	23.7991		+			0.462155	1.51764	-0.774839	0.943271	G_PP1_G_WT	RAP protein, putative	PBANKA_0208100.1-p1	5	5	10.8	10.8	10.8	65.718	0	8.4451	224120000
NaN	NaN	NaN	NaN	NaN	26.85	26.4593	26.6323	26.6667	26.5754	25.4207	24.7783	25.2749	25.4725	24.7226	NaN	NaN	NaN	NaN	NaN	NaN	NaN	23.9802	NaN	23.6024	NaN	NaN	NaN	NaN	NaN	+	+			-2.00467	1.50293	0	0.480067	G_I2_G_WT;G_PP1_G_WT	protein SOC3	PBANKA_1304500.1-p1	7	7	21.5	21.5	21.5	55.307	0	100.12	781350000
26.1598	NaN	25.741	NaN	26.2451	27.8359	27.5435	28.25	28.3775	28.257	26.6975	26.5104	26.4411	26.6342	26.4703	26.2901	25.7828	25.5213	26.6764	25.4575	27.7171	28.772	28.9388	28.7443	29.0513	26.8888	26.3227	27.121	27.1607	27.1551	+	+		+	-2.04404	1.50206	-0.984033	1.71502	G_I2_G_WT;G_PP1_G_WT;S_PP1_S_WT	40S ribosomal protein S15A, putative	PBANKA_0414600.1-p1	7	7	52.3	52.3	52.3	14.928	0	43.08	4865400000
31.8041	31.5012	31.4633	31.3882	31.3416	32.8561	33.0298	32.7929	32.6969	32.649	32.2581	32.253	32.3333	32.5774	32.3916	31.4664	31.2739	31.4351	31.5158	31.7988	32.5718	32.9361	32.9361	32.9696	33.1532	31.9618	31.2199	32.1129	32.2758	31.5997	+			+	-0.862953	0.442263	-0.335991	1.07938	G_I2_G_WT;S_PP1_S_WT	elongation factor 1-alpha	PBANKA_1133400.1-p1;PBANKA_1133300.1-p1	27	25	62.5	62.5	58.5	48.958	0	323.31	126020000000
25.9792	26.2912	25.7322	25.665	26.0084	27.7567	28.0552	27.1385	27.9767	27.0837	25.5594	26.1256	26.5976	26.1863	26.041	NaN	NaN	NaN	NaN	NaN	22.6284	22.3749	24.1541	22.9417	23.6626	NaN	NaN	NaN	NaN	22.0952		+			-0.166775	1.50017	0.0906261	0.792012	G_PP1_G_WT	kinesin, putative	PBANKA_1458800.1-p1	33	33	28.6	28.6	28.6	165	0	323.31	1839200000
NaN	NaN	NaN	NaN	NaN	24.6588	24.7636	24.8316	25.151	24.7414	23.3476	23.219	23.7382	23.383	22.9587	NaN	NaN	NaN	NaN	NaN	23.0454	23.3547	23.2657	23.1072	NaN	NaN	22.9675	23.1323	NaN	23.4902		+			-0.750332	1.5	0.0123886	0.575176	G_PP1_G_WT	NIMA related kinase 1, putative	PBANKA_1443000.1-p1	6	6	7.7	7.7	7.7	107.91	0	15.591	308230000
NaN	NaN	NaN	NaN	NaN	23.8092	23.2555	23.4593	23.5349	23.1604	NaN	NaN	NaN	22.6983	NaN	NaN	NaN	NaN	NaN	NaN	NaN	NaN	22.7865	NaN	NaN	NaN	NaN	NaN	NaN	NaN		+			0.526733	1.49791	0	0.109021	G_PP1_G_WT	cdc2-related protein kinase 5	PBANKA_1230200.1-p1	4	4	6.9	6.9	6.9	81.513	0	4.0682	114190000
27.3221	27.3695	26.7833	27.2255	27.1784	28.7133	28.5403	28.7763	28.6966	28.7607	27.2155	27.2391	27.307	27.2445	27.051	27.2353	27.401	27.3706	27.3898	27.2972	28.2883	28.4268	28.8134	28.9554	28.8949	27.7688	27.3488	27.6666	27.4249	27.7211		+		+	-0.0356373	1.48604	-0.24729	1.08973	G_PP1_G_WT;S_PP1_S_WT	26S protease regulatory subunit 6B, putative	PBANKA_0715600.1-p1	24	20	65.3	65.3	57.5	45.192	0	258.89	6838700000
NaN	NaN	NaN	NaN	NaN	23.5406	23.4387	23.3131	23.3687	23.1692	NaN	NaN	NaN	NaN	NaN	NaN	NaN	NaN	NaN	NaN	NaN	NaN	23.5939	23.6402	NaN	NaN	NaN	NaN	NaN	NaN		+			0	1.48585	0	-0.0312027	G_PP1_G_WT	conserved Plasmodium protein, unknown function	PBANKA_1429700.1-p1	5	5	7.2	7.2	7.2	98.11	0	13.369	117070000
26.2179	26.3404	25.5945	25.9319	26.3344	26.5467	26.4812	26.5007	26.3695	26.4668	25.8384	25.7841	25.8791	26.3934	25.6334	24.2809	24.3369	23.8661	24.455	24.2792	23.7527	24.2169	24.0527	NaN	NaN	NaN	NaN	23.4392	NaN	23.7472			+		0.178133	0.567296	1.89154	1.04164	S_I2_S_WT	conserved Plasmodium protein, unknown function	PBANKA_1431500.1-p1	13	13	38.2	38.2	38.2	42.169	0	47.942	1122400000
NaN	25.1531	24.88	24.1637	25.2948	23.9582	23.9581	23.5962	23.8746	23.7004	24.1573	24.1281	24.3744	24.4234	24.2726	NaN	NaN	24.5814	NaN	23.9282	NaN	NaN	23.6229	NaN	NaN	NaN	NaN	NaN	NaN	NaN					0.217607	-0.453667	1.37062	1.03161		conserved Plasmodium protein, unknown function	PBANKA_1002000.1-p1	5	5	10.6	10.6	10.6	71.288	0	60.968	322350000
24.7018	26.1062	25.4783	26.0355	26.2931	27.3846	26.5351	27.0794	26.5522	26.9215	25.3087	25.1886	25.7009	25.7183	25.1384	23.7864	23.9273	23.1563	23.4886	22.3842	22.5447	23.3669	24.4354	23.7607	23.9032	23.2804	22.377	23.3898	25.1009	24.6176		+			0.311983	1.48356	-0.404569	-0.150953	G_PP1_G_WT	structural maintenance of chromosomes protein 4, putative	PBANKA_1108700.1-p1	22	22	17.8	17.8	17.8	169.62	0	118.68	1131000000
NaN	NaN	NaN	NaN	NaN	25.191	26.0171	25.7125	25.2978	25.1791	24.0636	24.0768	24.0144	24.1059	23.7225	24.7712	24.2324	24.2681	24.4757	24.9431	25.3194	26.0627	26.5694	25.9276	26.0962	24.292	24.0478	24.2384	24.6387	24.8174	+	+		+	-1.60856	1.48284	0.131231	1.58821	G_I2_G_WT;G_PP1_G_WT;S_PP1_S_WT	small nuclear ribonucleoprotein F, putative	PBANKA_0921500.1-p1	4	4	43	43	43	10.031	0	9.755	851300000
NaN	NaN	NaN	NaN	NaN	25.5166	25.5118	25.3638	25.1917	25.4882	NaN	24.29	24.3035	24.6434	24.1695	NaN	NaN	NaN	NaN	NaN	24.3176	24.8767	24.78	24.8036	24.6216	23.8755	NaN	23.8538	NaN	NaN	+	+		+	-1.43878	1.47743	0.25178	1.97677	G_I2_G_WT;G_PP1_G_WT;S_PP1_S_WT	dolichyl-phosphate-mannose--protein mannosyltransferase, putative |	PBANKA_1209100.1-p1	5	5	36.4	36.4	36.4	26.1	0	141.19	504630000
NaN	24.2941	24.7155	25.3311	NaN	25.3131	24.8062	25.0447	25.1895	25.0475	25.0834	24.6806	25.0647	25.3348	24.7995	NaN	NaN	24.6444	NaN	25.6353	23.9985	24.2982	24.2177	24.8089	24.7456	24.4224	NaN	24.5322	24.5919	NaN					-0.839438	0.0876019	-0.189753	1.01336		parasite-infected erythrocyte surface protein	PBANKA_0209200.1-p1	13	13	29.9	29.9	29.9	58.833	0	57.439	558250000
NaN	NaN	NaN	NaN	NaN	23.2914	22.7766	22.7335	22.7246	22.5269	NaN	NaN	NaN	NaN	NaN	NaN	NaN	NaN	NaN	NaN	23.916	24.2255	24.4564	24.647	24.8448	23.3397	NaN	NaN	23.1991	23.3359		+		+	0	1.47536	-1.02771	1.39559	G_PP1_G_WT;S_PP1_S_WT	conserved Plasmodium protein, unknown function	PBANKA_1404700.1-p1	7	7	22.5	22.5	22.5	59.442	0	77.761	165270000
26.7204	26.8616	26.581	26.5345	26.6428	28.5384	28.0881	28.2526	28.1085	28.3108	26.7653	27.0188	27.0695	26.3951	26.6899	23.5156	23.1877	22.9293	24.2296	22.928	24.1123	23.3091	24.4037	23.2106	22.9099	22.8839	NaN	23.9664	22.9918	24.6493		+			-0.119666	1.47196	0.0847027	0.315772	G_PP1_G_WT	armadillo repeat protein PF16	PBANKA_0917400.1-p1	13	13	32.8	32.8	32.8	57.749	0	93.402	2553500000
26.0621	25.656	26.2209	25.6842	27.0955	28.3806	28.1341	28.0212	28.513	27.9282	26.6516	26.484	26.7829	27.267	26.447	25.1521	NaN	25.2607	24.647	NaN	25.7423	26.276	26.6857	26.6472	26.277	26.7946	26.8954	26.6998	26.8333	25.4748		+	+		-0.582755	1.46894	-2.55307	-0.213923	G_PP1_G_WT;S_I2_S_WT	replication factor C subunit 4, putative	PBANKA_1455100.1-p1	13	13	49.4	49.4	49.4	37.671	0	223.63	2826800000
25.8433	27.221	26.0886	26.5166	27.0875	28.4062	27.7477	28.0535	28.1002	27.9568	26.4005	26.6944	26.8421	26.4839	26.5037	23.4855	24.8216	25.1861	24.8305	24.883	25.1098	26.2386	26.0558	26.3859	26.4985	24.8262	24.5774	25.0213	25.2358	25.5129		+			-0.0335064	1.46795	-0.393393	1.02299	G_PP1_G_WT	replication factor C subunit 3, putative	PBANKA_1326800.1-p1	12	12	43.6	43.6	43.6	39.319	0	70.338	2782400000
NaN	NaN	NaN	NaN	NaN	25.1834	24.4334	25.036	25.1187	24.5217	23.6465	23.4046	23.4105	23.3676	23.157	NaN	NaN	NaN	NaN	NaN	24.6947	25.727	25.7182	25.8619	25.7986	NaN	24.1185	24.5369	24.2938	24.3553	+	+	+	+	-0.97498	1.4614	-1.80731	1.53256	G_I2_G_WT;G_PP1_G_WT;S_I2_S_WT;S_PP1_S_WT	autophagy-related protein 18, putative	PBANKA_1211300.1-p1	11	11	30	30	30	43.534	0	45.031	490040000
NaN	NaN	NaN	NaN	NaN	23.6629	23.9331	23.8467	23.693	24.2544	23.1525	NaN	NaN	NaN	NaN	NaN	NaN	NaN	NaN	NaN	NaN	NaN	NaN	NaN	NaN	NaN	NaN	NaN	NaN	NaN		+			0.314077	1.45902	0	0	G_PP1_G_WT	conserved Plasmodium protein, unknown function	PBANKA_1324800.1-p1	5	5	12.2	12.2	12.2	71.734	0	10.299	114000000
NaN	NaN	NaN	NaN	NaN	22.0787	NaN	NaN	NaN	NaN	NaN	NaN	NaN	NaN	NaN	NaN	23.7873	23.6278	23.7732	23.2884	23.4488	24.2845	24.1666	23.972	24.2145	22.8914	NaN	23.1812	23.3079	23.3822					0	0.0870598	0.430098	0.979943		DNA mismatch repair protein MSH2, putative	PBANKA_1017100.1-p1	5	5	7.9	7.9	7.9	94.648	0	20.388	132420000
26.2188	27.061	26.7879	27.0183	27.2391	28.8132	28.4287	28.729	28.6476	28.6231	27.0935	27.1569	27.305	27.311	27.081	26.4861	26.0128	26.887	26.8284	26.2517	27.8809	28.0344	28.1441	28.2636	28.215	26.8959	26.4477	27.0228	26.5986	26.7452		+		+	-0.324472	1.45883	-0.248831	1.36555	G_PP1_G_WT;S_PP1_S_WT	calcium-transporting ATPase, putative	PBANKA_0207000.1-p1	27	27	33	33	33	127.35	0	323.31	5532600000
26.2514	26.3091	25.7903	25.5481	27.3297	28.5818	27.6174	27.835	27.6718	27.7075	26.1787	26.3787	27.0592	26.3799	26.1295	24.4442	24.8694	24.8044	24.773	24.6414	22.8863	22.8232	23.7264	22.8556	22.8679	NaN	22.0271	NaN	22.2031	22.9108		+	+		-0.179455	1.4575	2.55262	0.878025	G_PP1_G_WT;S_I2_S_WT	kinesin-8, putative	PBANKA_0202700.1-p1	34	34	30.3	30.3	30.3	168.81	0	210.29	2185200000
NaN	NaN	NaN	NaN	23.8242	24.4987	24.2169	24.1824	24.3742	24.3691	23.1153	NaN	23.7786	23.0023	NaN	NaN	NaN	NaN	NaN	NaN	23.2333	23.0163	23.5081	23.3202	23.1915	NaN	NaN	NaN	NaN	NaN		+		+	-0.366409	1.45678	0	1.48655	G_PP1_G_WT;S_PP1_S_WT	cytoskeleton associated protein, putative	PBANKA_0805200.1-p1	7	7	13.1	13.1	13.1	96.401	0	103.58	227480000
NaN	NaN	NaN	NaN	NaN	24.1847	23.9393	24.0275	24.0799	23.8535	NaN	NaN	NaN	NaN	NaN	NaN	NaN	NaN	NaN	NaN	NaN	NaN	NaN	23.7614	NaN	NaN	NaN	NaN	NaN	NaN		+			0	1.45677	0	0.236811	G_PP1_G_WT	transcription elongation factor SPT5, putative	PBANKA_0109200.1-p1	6	6	8.2	8.2	8.2	136.05	0	12.803	136650000
NaN	NaN	NaN	NaN	NaN	23.4583	23.5054	23.6727	23.2539	23.6924	NaN	NaN	22.9674	22.7694	NaN	NaN	NaN	NaN	NaN	NaN	NaN	NaN	NaN	22.6186	NaN	NaN	NaN	NaN	NaN	NaN		+			0.548117	1.45089	0	0.673191	G_PP1_G_WT	inner membrane complex protein, putative	PBANKA_1237300.1-p1	4	4	11.5	11.5	11.5	55.384	0	15.712	272950000
27.7694	27.9009	27.3817	27.9938	27.8883	29.0513	28.5887	29.344	29.1734	29.2208	27.5398	27.5812	27.6272	27.7123	27.7057	27.2364	27.351	27.6947	27.2478	27.6002	27.8862	28.0902	28.2447	28.338	28.184	26.6295	26.0865	26.7576	26.5799	26.8458		+		+	0.153605	1.44241	0.846188	1.56878	G_PP1_G_WT;S_PP1_S_WT	ADP/ATP transporter on adenylate translocase, putative	PBANKA_0520200.1-p1	13	12	43.2	43.2	40.5	33.805	0	163.86	7192900000
NaN	NaN	NaN	NaN	NaN	24.7123	24.8148	24.9504	24.7212	24.8203	23.6321	23.5087	23.7661	24.2947	NaN	NaN	NaN	NaN	NaN	NaN	NaN	NaN	NaN	NaN	NaN	NaN	NaN	NaN	NaN	NaN	+	+			-1.25324	1.4391	0	0	G_I2_G_WT;G_PP1_G_WT	conserved Plasmodium protein, unknown function	PBANKA_0719700.1-p1	8	8	11.8	11.8	11.8	88.621	0	11.909	221560000
NaN	NaN	NaN	NaN	NaN	24.5179	23.7976	23.829	23.8037	23.7627	23.1532	NaN	23.0576	23.0935	NaN	NaN	NaN	NaN	NaN	NaN	NaN	NaN	NaN	NaN	NaN	NaN	NaN	NaN	NaN	NaN		+			-0.196721	1.43709	0	0	G_PP1_G_WT	conserved Plasmodium protein, unknown function	PBANKA_0310500.1-p1	8	8	5.1	5.1	5.1	241.66	0	43.803	126300000
NaN	NaN	NaN	NaN	NaN	24.8654	24.3274	24.4435	24.7224	24.8259	23.3259	23.4685	23.4823	23.8384	NaN	NaN	NaN	NaN	NaN	NaN	NaN	NaN	23.1656	NaN	NaN	NaN	NaN	NaN	NaN	NaN		+			-0.714477	1.43381	0	-0.425856	G_PP1_G_WT	conserved Plasmodium protein, unknown function	PBANKA_0513900.1-p1	10	10	8.8	8.8	8.8	159.82	0	93.164	207600000
NaN	NaN	NaN	NaN	NaN	24.9707	24.1739	25.027	25.0885	24.0749	23.5476	24.2677	24.1602	23.9374	24.3386	NaN	NaN	NaN	NaN	NaN	24.2299	NaN	24.6447	24.6793	24.5157	NaN	NaN	23.8736	24.3922	23.7626	+				-1.12752	0.616691	-1.02649	0.954142	G_I2_G_WT	RNA-binding protein, putative	PBANKA_0830000.1-p1	6	6	30.5	30.5	30.5	32.388	0	26.33	335260000
NaN	NaN	NaN	NaN	NaN	24.2746	23.8834	23.6559	23.7397	24.2049	NaN	NaN	23.2343	NaN	NaN	NaN	NaN	NaN	NaN	NaN	24.2729	23.9813	24.7666	25.0582	24.6638	NaN	NaN	24.1761	24.1098	23.4325		+	+	+	-0.1424	1.43204	-1.58227	1.30954	G_PP1_G_WT;S_I2_S_WT;S_PP1_S_WT	nucleolar protein 56, putative	PBANKA_0929600.1-p1	8	8	23.8	23.8	23.8	57.645	0	52.154	247700000
26.9364	28.1845	27.0561	28.5223	27.7887	30.8159	29.1666	29.5342	29.7021	30.5147	29.5771	29.3291	29.7811	30.194	29.1628	NaN	NaN	23.3189	NaN	27.4235	NaN	NaN	26.6499	NaN	23.2262	NaN	NaN	NaN	21.7886	NaN	+				-1.91123	0.337867	1.28394	0.949951	G_I2_G_WT	secreted ookinete protein	PBANKA_1113400.1-p1	21	21	37.2	37.2	37.2	85.114	0	298.39	10928000000
NaN	NaN	NaN	NaN	NaN	24.2917	23.2075	24.1139	24.2058	24.0616	NaN	22.9293	23.3242	22.8781	NaN	NaN	NaN	NaN	NaN	NaN	NaN	23.8392	23.7201	24.287	24.038	NaN	NaN	NaN	NaN	23.1539		+			0.446809	1.43064	-0.234153	1.08589	G_PP1_G_WT	prohibitin, putative	PBANKA_0701500.1-p1	4	4	19.9	19.9	19.9	30.531	0	10.293	193090000
NaN	NaN	NaN	NaN	NaN	23.8489	22.9056	23.3399	23.437	21.8317	20.6805	NaN	20.8512	NaN	21.8086	23.2018	22.8685	22.8249	24.6272	22.5592	26.185	27.8589	27.2687	27.3361	28.2687	25.2419	24.2985	22.4258	24.887	24.4139		+		+	1.00703	1.42966	-1.03705	3.13011	G_PP1_G_WT;S_PP1_S_WT	conserved Plasmodium protein, unknown function	PBANKA_1425900.1-p1	24	24	26.8	26.8	26.8	154.42	0	269.95	981550000
NaN	NaN	NaN	NaN	23.9648	26.0678	25.2792	25.4199	25.5836	25.4395	24.6204	24.3456	23.9501	23.824	23.9437	24.8109	25.2248	24.7269	25.0522	24.451	25.2572	25.5868	26.0414	25.9661	25.7925	24.9225	24.9134	24.9373	24.9238	25.4051	+	+			-1.19919	1.42123	-0.16728	0.708398	G_I2_G_WT;G_PP1_G_WT	selenide water dikinase, putative	PBANKA_0811600.1-p1	22	22	27.5	27.5	27.5	116.88	0	67.697	834100000
NaN	NaN	NaN	NaN	NaN	24.0931	23.824	23.9192	23.8945	23.9195	24.1038	24.16	24.1546	23.6575	24.1104	NaN	NaN	NaN	NaN	NaN	24.6891	24.6406	25.002	24.8624	25.0746	24.2842	23.736	23.6699	23.8501	24.0638	+		+		-1.58551	-0.107241	-1.55116	0.932944	G_I2_G_WT;S_I2_S_WT	conserved Plasmodium protein, unknown function	PBANKA_0804100.1-p1	8	8	6.3	6.3	6.3	177.94	0	15.215	336260000
NaN	NaN	NaN	NaN	NaN	23.3441	22.7366	23.1223	23.0002	22.7479	NaN	NaN	NaN	NaN	NaN	NaN	NaN	NaN	NaN	NaN	NaN	NaN	NaN	NaN	NaN	NaN	NaN	NaN	NaN	NaN		+			0	1.41901	0	0	G_PP1_G_WT	GAS8-like protein, putative	PBANKA_1123800.1-p1	2	2	4.1	4.1	4.1	53.762	0.00049925	3.154	56787000
NaN	NaN	NaN	NaN	NaN	23.2631	23.1789	23.1307	23.0441	23.2386	NaN	NaN	NaN	22.7714	NaN	NaN	NaN	NaN	NaN	NaN	NaN	NaN	NaN	NaN	NaN	NaN	NaN	NaN	NaN	NaN		+			0.919256	1.41847	0	0	G_PP1_G_WT	conserved Plasmodium protein, unknown function	PBANKA_0108100.1-p1	6	6	6	6	6	130.74	0	6.4376	70074000
25.2476	26.5772	25.4588	25.3914	25.8311	25.8699	25.8821	25.4919	25.8653	25.8722	25.4506	25.5769	25.71	25.7269	25.4905	24.4585	23.9822	24.2996	24.8537	24.0509	23.8245	23.6778	24.3313	24.0001	24.2548	NaN	NaN	24.9957	NaN	24.2043					0.110214	0.205302	1.23711	0.925822		flap endonuclease 1, putative	PBANKA_1006100.1-p1	7	7	21.3	21.3	21.3	54.542	0	50.846	895080000
26.4907	26.8411	26.3355	26.4263	26.4832	26.8287	26.8755	26.6823	26.6532	26.6557	26.159	26.2494	26.2122	26.2265	26.3342	27.4647	27.3582	27.3871	27.182	27.61	27.4147	26.6755	27.2896	27.1559	27.2802	25.9949	25.8437	25.9778	26.5925	26.797					0.279061	0.50279	1.15923	0.921997		phosphoribosylpyrophosphate synthetase, putative	PBANKA_1340300.1-p1	14	14	39.8	39.8	39.8	48.215	0	232.29	2709500000
25.4044	26.0327	24.6367	25.1884	25.9043	27.7454	27.2641	27.7285	27.6471	27.6842	26.1923	26.2166	26.3495	26.109	26.1178	25.4195	25.3956	25.7469	25.5665	25.881	26.8007	27.2257	27.5408	27.5811	27.5591	26.0905	25.7996	25.931	26.285	26.3544		+		+	-0.763741	1.41679	-0.490195	1.24939	G_PP1_G_WT;S_PP1_S_WT	eukaryotic translation initiation factor 3 subunit L, putative	PBANKA_0110400.1-p1	14	14	29.6	29.6	29.6	67.669	0	304.82	2842200000
26.1861	24.8862	25.7808	25.4118	26.2158	25.2101	25.9086	25.8312	25.0326	25.1012	25.3484	25.7089	25.3537	25.6827	26.4918	25.314	24.7799	25.3486	24.8037	25.6999	25.2904	25.0388	24.3951	25.0542	25.2701	25.3847	NaN	25.8209	25.8595	NaN					-0.0209629	-0.30034	1.09824	0.918739		nuclear transport factor 2, putative	PBANKA_1030300.1-p1	5	5	50.4	50.4	50.4	14.447	0	19.675	931550000
26.7709	26.4823	25.7825	25.6347	26.6531	27.3313	26.4886	26.8496	27.1663	26.8341	25.6019	25.4555	25.6739	25.6423	25.2305	24.5133	22.4291	24.5691	24.6033	24.2182	20.7205	22.7965	24.7556	23.4746	22.4928	NaN	NaN	NaN	NaN	22.6554		+	+		0.743871	1.41316	2.22277	1.00418	G_PP1_G_WT;S_I2_S_WT	FANCJ-like helicase, putative	PBANKA_1034100.1-p1	25	25	26.3	26.3	26.3	124.96	0	140.6	1335600000
23.5391	NaN	NaN	23.9378	24.0174	25.7263	25.1214	25.5466	25.4722	25.5276	24.2823	24.012	24.2956	24.235	23.5062	NaN	NaN	NaN	NaN	NaN	NaN	NaN	NaN	NaN	NaN	NaN	NaN	NaN	NaN	NaN		+			-0.928484	1.41262	0	0	G_PP1_G_WT	conserved Plasmodium protein, unknown function	PBANKA_1320100.1-p1	11	11	19	19	19	93.343	0	119.19	380360000
NaN	NaN	NaN	NaN	NaN	23.3109	NaN	23.107	23.3283	23.3049	NaN	NaN	23.8621	23.7965	22.6579	NaN	NaN	NaN	NaN	NaN	24.1406	24.2325	24.9272	25.1831	25.0837	24.1684	NaN	24.6782	24.8704	24.2384					-0.27574	0.396935	-1.69578	0.9032		glideosome-associated protein 40, putative	PBANKA_1115300.1-p1	5	5	20.3	20.3	20.3	52.116	0	12.771	232820000
24.1049	24.0351	23.8861	24.1612	24.001	24.2046	23.6087	23.8742	24.0173	23.9642	24.1901	24.3462	24.5769	24.4971	23.7868	24.1552	24.0836	23.886	23.9741	24.3265	24.3816	NaN	23.9441	NaN	24.3111	NaN	NaN	23.9776	NaN	24.16					-0.241751	-0.345611	1.41401	0.89995		arsenical pump-driving ATPase, putative	PBANKA_0717000.1-p1	5	5	15.8	15.8	15.8	42.984	0	17.277	348520000
25.6134	25.869	23.236	24.1283	25.8698	27.0864	26.4324	26.9562	27.0316	26.5017	25.467	25.2996	25.5271	25.3944	25.2692	NaN	NaN	NaN	NaN	NaN	24.6992	25.3077	25.5905	25.5441	25.3861	NaN	NaN	NaN	23.2555	24.7649		+		+	-0.448169	1.41016	-0.444603	2.32991	G_PP1_G_WT;S_PP1_S_WT	DNA primase large subunit, putative	PBANKA_0812000.1-p1	15	15	35	35	35	63.719	0	178.32	1246900000
NaN	NaN	NaN	NaN	NaN	23.7793	NaN	23.6638	23.4278	23.6799	23.1333	23.5051	23.0568	NaN	NaN	NaN	NaN	NaN	24.8961	24.5285	24.1088	24.4306	25.3224	25.2763	25.2807	23.7974	23.9562	23.7475	24.0453	24.4339					-0.0904491	0.636548	-0.454519	0.887728		ATP-dependent RNA helicase DDX5, putative	PBANKA_1309700.1-p1	6	6	13.2	13.2	13.2	59.104	0	6.6224	386130000
24.8748	24.286	23.5662	24.1308	25.0953	25.5503	24.758	25.5067	25.0884	25.219	23.6023	23.7435	23.8122	23.8744	24.0611	NaN	NaN	22.4909	22.5358	22.8203	22.6949	22.3119	22.7172	22.7805	22.3407	NaN	NaN	NaN	NaN	NaN		+			0.57197	1.40582	0.360671	0.221331	G_PP1_G_WT	conserved Plasmodium protein, unknown function	PBANKA_0303300.1-p1	7	7	13.9	13.9	13.9	74.425	0	17.223	394770000
NaN	NaN	NaN	NaN	NaN	25.1641	24.7847	24.7592	24.9614	24.683	24.1253	NaN	24.3363	23.3184	23.7907	NaN	NaN	NaN	NaN	NaN	24.4939	24.6228	24.6776	24.8075	25.2216	24.2603	NaN	NaN	24.2022	24.0103		+		+	-0.504664	1.40095	-0.752473	1.73322	G_PP1_G_WT;S_PP1_S_WT	pre-mRNA-processing factor 19, putative	PBANKA_0406800.1-p1	7	7	22	22	22	56.677	0	35.778	398980000
NaN	NaN	NaN	NaN	NaN	23.545	23.269	23.5589	23.7177	23.0246	NaN	NaN	NaN	NaN	NaN	NaN	NaN	NaN	NaN	NaN	22.9407	23.0779	23.2774	23.3815	23.3773	NaN	NaN	NaN	NaN	NaN		+			0	1.39239	0	0.838324	G_PP1_G_WT	protein transport protein SEC7, putative	PBANKA_1306800.1-p1	8	8	3.8	3.8	3.8	352.94	0	29.029	113590000
27.2814	27.6562	26.106	26.8946	27.323	29.2199	29.3006	29.3425	29.2879	29.1985	27.8763	27.8142	27.9362	28.0631	27.7241	26.6105	26.4484	26.7148	26.7814	26.8483	28.1026	28.6902	28.7761	28.8918	28.7519	27.1852	27.051	27.2251	27.4062	27.41		+		+	-0.830565	1.38709	-0.574825	1.38704	G_PP1_G_WT;S_PP1_S_WT	HSP40, subfamily A, putative	PBANKA_0610900.1-p1	21	21	49.8	49.8	49.8	48.417	0	238.6	8181900000
26.7995	26.9013	26.5298	26.4498	26.5946	28.0779	27.7037	27.8516	27.9757	27.8566	26.5675	26.7233	26.558	26.3008	26.3894	26.9051	26.9157	26.7196	26.8148	26.7657	27.306	27.3148	27.7569	27.828	27.6332	26.7498	26.7956	26.8997	26.5836	27.0069		+			0.14718	1.38529	0.017057	0.760665	G_PP1_G_WT	26S protease regulatory subunit 7, putative	PBANKA_1410000.1-p1	18	16	46.2	43.3	40.5	46.817	0	323.31	3929200000
NaN	NaN	NaN	NaN	NaN	22.9994	23.2341	23.1521	23.5473	23.3782	NaN	NaN	NaN	22.7407	NaN	NaN	NaN	NaN	NaN	NaN	NaN	23.4512	23.3195	23.525	NaN	NaN	NaN	NaN	NaN	NaN	+	+			0.964413	1.37766	0	-0.0693092	G_I2_G_WT;G_PP1_G_WT	conserved protein, unknown function	PBANKA_0409800.1-p1	4	4	9.3	9.3	9.3	68.784	0	30.926	118090000
NaN	NaN	NaN	NaN	NaN	25.2529	25.1398	25.2314	25.4691	25.204	25.5943	25.9332	25.1133	25.8267	25.2103	NaN	NaN	NaN	NaN	NaN	24.7008	24.9215	25.1036	25.2559	25.0283	NaN	NaN	25.385	25.7384	25.5425	+				-2.64918	-0.276112	-1.32854	0.861164	G_I2_G_WT	mitochondrial-processing peptidase subunit alpha, putative	PBANKA_1237900.1-p1	11	11	26	26	26	61.263	0	98.778	557050000
27.3125	27.782	26.7761	26.3975	27.309	27.1573	28.0818	27.7862	27.6822	27.3611	27.9344	27.6391	28.2385	28.2391	27.5824	27.0184	26.0784	25.5065	26.0761	25.6857	27.3649	27.6504	28.0492	28.0417	27.8075	27.4335	26.4772	26.6169	27.2939	26.805					-0.811258	-0.312954	-0.852247	0.857449		histone H4, putative	PBANKA_0941900.1-p1	7	4	57.3	57.3	38.8	11.455	0	31.032	3964700000
NaN	NaN	NaN	NaN	NaN	NaN	NaN	NaN	NaN	NaN	NaN	NaN	NaN	NaN	NaN	NaN	NaN	NaN	NaN	NaN	23.5534	23.3994	23.5386	23.7093	23.8183	23.6419	NaN	NaN	NaN	23.6583					0	0	-0.65517	0.854065		conserved Plasmodium protein, unknown function	PBANKA_1025000.1-p1	3	3	19.6	19.6	19.6	24.78	0	9.7136	94429000
25.902	25.3002	25.0603	25.5598	25.2687	25.4716	25.4616	25.8008	25.2965	24.6183	25.3674	25.8623	25.9982	26.1311	26.6462	25.2654	25.3826	25.6241	25.8012	25.852	26.3027	26.3899	27.1791	26.1169	26.3568	25.6921	25.0648	25.9297	25.9802	25.4173					-0.582872	-0.671289	-0.0317631	0.852259		60S acidic ribosomal protein P2, putative	PBANKA_0407700.1-p1	7	7	54.1	54.1	54.1	11.804	0	149.48	1228900000
NaN	NaN	NaN	NaN	NaN	28.1078	27.5339	28.123	27.9403	27.8968	26.3724	26.4846	26.5405	26.848	26.5287	NaN	NaN	NaN	NaN	NaN	27.495	27.6062	28.1478	28.0588	28.3856	25.7711	25.4299	26.212	26.919	26.8809	+	+	+	+	-4.35481	1.3655	-3.92167	1.6961	G_I2_G_WT;G_PP1_G_WT;S_I2_S_WT;S_PP1_S_WT	erythrocyte membrane associated protein 1	PBANKA_0836800.1-p1	12	12	54.5	54.5	54.5	38.263	0	97.518	3252600000
NaN	NaN	NaN	NaN	NaN	25.6823	24.1764	24.4684	24.723	23.482	24.6024	24.6517	24.5563	24.4786	23.307	27.3509	27.0113	27.5573	28.1683	27.8005	28.4432	28.4073	28.8746	28.6257	28.8496	28.0843	27.5644	27.7301	27.9779	27.6065	+				-1.76915	0.187215	-0.214985	0.847412	G_I2_G_WT	rhoptry-associated protein 2/3	PBANKA_1101400.1-p1	17	17	46.6	46.6	46.6	45.696	0	136.85	3315300000
24.8226	24.9429	25.2975	24.3905	25.3504	24.7549	24.7873	24.6733	24.6764	25.2827	24.0588	24.169	24.468	24.36	24.1025	NaN	23.0812	23.1851	23.3551	23.1887	22.7047	NaN	22.8275	22.5533	NaN	NaN	NaN	NaN	NaN	22.9814					0.729113	0.603224	1.16108	0.846795		conserved Plasmodium protein, unknown function	PBANKA_1109600.1-p1	7	7	10.4	10.4	10.4	79.69	0	18.672	422970000
NaN	NaN	NaN	NaN	NaN	24.5139	24.0916	23.9767	24.2292	24.1596	25.0184	24.4992	24.9914	25.1902	24.3129	NaN	NaN	NaN	23.2888	23.3056	24.2395	24.4809	24.8282	24.6514	24.9536	24.4791	NaN	24.41	24.6984	23.5139	+				-1.77931	-0.608222	-1.28502	0.846072	G_I2_G_WT	40S ribosomal protein S28e, putative	PBANKA_1325000.1-p1	2	2	35.8	35.8	35.8	7.5097	0	5.8461	399900000
NaN	NaN	NaN	NaN	NaN	23.6192	23.2897	23.5409	23.3441	23.413	NaN	NaN	NaN	NaN	NaN	NaN	NaN	NaN	NaN	NaN	NaN	NaN	23.0973	23.5157	23.5153	NaN	NaN	NaN	NaN	NaN		+			0	1.36233	0	1.23416	G_PP1_G_WT	NOT family protein, putative	PBANKA_1025500.1-p1	7	7	2.2	2.2	2.2	481.85	0	9.3651	110650000
NaN	NaN	NaN	NaN	NaN	NaN	NaN	NaN	NaN	NaN	NaN	NaN	NaN	NaN	NaN	24.5652	24.4305	24.3086	23.8952	24.6861	24.0524	24.1788	24.4266	24.2718	24.4952	NaN	24.1987	NaN	24.1635	24.7095					0	0	0.932109	0.839955		polypyrimidine tract-binding protein, putative	PBANKA_0105200.1-p1	8	8	16.2	16.2	16.2	75.841	0	18.26	246320000
NaN	NaN	NaN	NaN	NaN	25.2756	25.1815	25.0253	25.2609	24.7374	23.7646	24.1893	24.1647	24.4131	NaN	NaN	NaN	NaN	NaN	NaN	NaN	24.5865	24.747	24.5439	24.8597	NaN	NaN	NaN	NaN	NaN	+	+		+	-1.66113	1.35567	0	2.09546	G_I2_G_WT;G_PP1_G_WT;S_PP1_S_WT	conserved Plasmodium protein, unknown function	PBANKA_1403800.1-p1	12	12	4.3	4.3	4.3	394.9	0	28.497	400890000
NaN	NaN	NaN	NaN	24.0862	26.1669	25.0177	25.8252	26.137	25.6442	23.8121	24.4653	24.6558	24.7963	24.292	23.6805	NaN	NaN	23.8301	24.0537	24.1647	25.0681	24.7995	25.7249	25.6096	23.8473	NaN	24.1613	24.5705	NaN	+	+		+	-1.68867	1.3539	-0.16019	1.78238	G_I2_G_WT;G_PP1_G_WT;S_PP1_S_WT	translocation protein SEC63, putative	PBANKA_1417300.1-p1	11	11	21.4	21.4	21.4	77.763	0	82.594	699690000
NaN	NaN	NaN	NaN	NaN	23.9595	23.3915	NaN	23.3123	23.4505	NaN	NaN	NaN	NaN	NaN	23.7366	23.9918	NaN	23.9888	23.7955	24.0944	23.8932	24.3204	24.1332	23.9543	24.4508	NaN	23.9191	NaN	24.4209		+			0	1.35152	0.0502934	0.629544	G_PP1_G_WT	RNA-binding protein, putative	PBANKA_0101900.1-p1	5	5	10	10	10	55.254	0	10.656	237260000
28.1649	28.1771	28.3216	28.089	28.4104	28.6163	28.5073	28.2729	29.8407	27.9172	28.5102	28.3382	28.6215	28.7213	28.6411	28.1586	28.1615	28.543	28.2439	28.3983	28.6686	29.3209	30.3171	28.6529	28.367	28.1116	28.1469	27.7089	28.3569	28.9246					-0.333848	0.0644238	0.0512722	0.815522		deubiquinating/deneddylating enzyme, putative	PBANKA_0930900.1-p1	15	15	41.5	41.5	41.5	49.539	0	57.681	13219000000
25.6095	25.4542	25.4946	26.2044	26.116	29.0428	28.7927	29.129	29.1582	29.1307	27.078	27.6316	27.8399	28.1391	27.8173	21.84	21.4455	22.4024	NaN	22.4296	21.6943	20.9959	22.0747	20.4807	22.1089	22.0935	NaN	21.7504	24.245	21.9897	+	+			-1.92545	1.34949	-0.528465	-1.08407	G_I2_G_WT;G_PP1_G_WT	LCCL domain-containing protein	PBANKA_1035200.1-p1	31	31	30.1	30.1	30.1	148.2	0	323.31	4015400000
NaN	NaN	20.3843	NaN	NaN	NaN	NaN	23.4235	24.324	NaN	NaN	NaN	NaN	NaN	NaN	28.9988	29.4029	28.8096	29.6185	28.2787	NaN	22.221	NaN	22.5949	22.662	23.5601	21.6954	NaN	21.3715	22.3702	+	+	+		1.30574	1.33479	6.8891	0.193624	G_I2_G_WT;G_PP1_G_WT;S_I2_S_WT	reticulocyte binding protein, putative	PBANKA_0501000.1-p1;PBANKA_1000100.1-p1;PBANKA_0524841.1-p1	53	37	23.9	23.9	16.5	321.14	0	323.31	2498500000
NaN	NaN	NaN	24.4364	NaN	25.6569	24.2587	25.3775	25.5246	25.3452	NaN	25.0349	25.256	25.1847	NaN	25.4849	24.6592	25.0151	25.4154	24.7286	25.8997	26.6357	26.6444	26.6026	26.7011	NaN	NaN	25.2081	25.2253	25.3288		+		+	-1.18401	1.33421	1.07595	2.51202	G_PP1_G_WT;S_PP1_S_WT	40S ribosomal protein S5, putative	PBANKA_0619100.1-p1	4	4	27.8	27.8	27.8	21.743	0	9.9191	1056100000
NaN	NaN	NaN	NaN	NaN	24.6742	23.4383	24.6202	24.679	NaN	23.1773	23.9096	23.7831	24.2513	NaN	NaN	NaN	NaN	NaN	NaN	23.1749	22.9684	23.808	23.9077	24.1401	NaN	NaN	23.2781	23.3145	NaN					-0.491271	0.396519	-0.569342	0.80645		major facilitator superfamily-related transporter, putative	PBANKA_0918300.1-p1	4	4	7.4	7.4	7.4	57.09	0	22.471	222580000
NaN	NaN	NaN	NaN	NaN	24.856	24.9838	24.2537	24.4375	23.9919	23.2871	23.0724	23.3537	22.8321	23.3352	NaN	NaN	NaN	NaN	NaN	NaN	NaN	NaN	22.2318	NaN	NaN	NaN	NaN	NaN	NaN	+	+			-1.06435	1.32847	0	0.0595268	G_I2_G_WT;G_PP1_G_WT	serine/threonine protein kinase, putative	PBANKA_0104100.1-p1	4	4	16.1	16.1	16.1	40.909	0	4.0747	235950000
NaN	NaN	NaN	NaN	NaN	23.2297	23.1402	22.742	23.1411	23.1065	NaN	NaN	NaN	NaN	NaN	NaN	NaN	NaN	NaN	NaN	23.785	23.5098	24.6744	24.4261	24.0353	NaN	NaN	22.9868	NaN	NaN		+		+	0	1.31969	0.229742	1.76948	G_PP1_G_WT;S_PP1_S_WT	conserved Plasmodium protein, unknown function	PBANKA_1142100.1-p1	5	5	1.7	1.7	1.7	399.66	0	6.4615	146900000
26.3988	25.0538	24.7507	NaN	25.9341	26.8283	27.2435	27.0199	26.8867	27.0108	25.6387	25.5845	25.8115	25.6858	25.6715	26.0511	25.8895	26.0032	26.1669	26.3017	27.1621	26.8395	27.2679	27.3102	27.225	25.9768	26.2682	26.2099	26.3851	26.549		+			-0.612286	1.31943	-0.195314	0.88315	G_PP1_G_WT	26S proteasome regulatory subunit RPN9, putative	PBANKA_0514500.1-p1	16	16	41.5	41.5	41.5	46.323	0	212.61	2263700000
NaN	NaN	NaN	NaN	NaN	NaN	NaN	NaN	NaN	NaN	NaN	NaN	NaN	NaN	NaN	NaN	NaN	NaN	NaN	NaN	23.9243	24.0617	24.3334	24.187	24.3992	NaN	NaN	NaN	23.8621	23.9389					0	0	-0.706588	0.787947		serine/threonine protein kinase, FIKK family	PBANKA_1225000.1-p1	4	4	5.7	5.7	5.7	139.79	0	16.547	101420000
NaN	23.9033	NaN	NaN	23.6443	24.1552	25.1603	25.0059	25.0398	24.3469	24.3633	24.7136	NaN	23.5362	23.2098	NaN	NaN	23.6638	24.7796	23.5714	26.4803	27.4325	27.5673	27.5865	27.541	NaN	24.1388	23.7872	24.3448	25.3473		+		+	-0.438784	1.31775	-0.636755	3.6223	G_PP1_G_WT;S_PP1_S_WT	60S ribosomal protein L15, putative	PBANKA_0717800.1-p1	5	5	26.8	26.8	26.8	24.082	0	38.708	1127500000
NaN	NaN	NaN	NaN	23.8149	25.6699	24.6373	25.2317	25.209	24.8863	23.9989	23.6194	23.8868	23.6855	23.8573	NaN	NaN	24.0508	NaN	23.595	24.422	24.5694	24.2155	24.9428	24.8831	NaN	NaN	NaN	23.5679	NaN	+	+		+	-1.04337	1.31725	1.08223	2.49641	G_I2_G_WT;G_PP1_G_WT;S_PP1_S_WT	zinc finger protein, putative	PBANKA_0604200.1-p1	9	9	10.7	10.7	10.7	133.11	0	141.08	480700000
NaN	NaN	NaN	NaN	NaN	27.2844	26.0676	26.8027	26.8022	26.6398	25.6358	25.3282	25.3689	25.422	25.274	NaN	NaN	NaN	NaN	NaN	24.7167	25.1885	25.5339	26.0961	25.929	23.7417	NaN	NaN	24.5296	24.235	+	+	+	+	-3.1332	1.31354	-1.672	1.8223	G_I2_G_WT;G_PP1_G_WT;S_I2_S_WT;S_PP1_S_WT	sortilin, putative	PBANKA_1315500.1-p1	10	10	20.3	20.3	20.3	100.95	0	194.39	1115900000
25.4251	25.3005	26.1719	25.5592	25.5813	25.5849	25.1562	25.0836	25.6178	25.6264	25.9597	25.4025	26.16	26.2439	26.5507	27.2528	27.5615	26.73	27.9495	26.8995	27.0115	26.4373	27.2966	27.0751	27.2794	26.2752	25.6063	26.4072	27.354	25.5896					-0.455767	-0.649565	1.0322	0.773496		40S ribosomal protein S10, putative	PBANKA_0617200.1-p1	6	6	40.1	40.1	40.1	16.627	0	42.385	2054400000
25.4046	25.4361	25.4858	25.0375	25.454	25.2561	25.2139	25.2211	25.3755	25.3147	25.207	25.0467	25.2381	25.1894	25.2177	24.2169	24.2718	24.5925	24.2466	24.417	23.8672	23.9163	24.0353	24.074	23.8779	24.248	NaN	NaN	NaN	24.4835					0.183809	0.0964813	1.16259	0.767781		DNA polymerase epsilon subunit B, putative	PBANKA_1448900.1-p1	9	9	18.3	18.3	18.3	73.233	0	16.969	668160000
28.6246	28.883	28.2833	28.4598	28.7441	30.2349	29.9598	30.0982	30.0356	30.0173	28.6588	28.7303	28.9196	28.8354	28.6364	28.945	29.0025	29.0273	29.0205	29.0868	29.7746	29.8136	30.1826	30.2085	30.2564	29.3822	29.1315	29.3908	29.4985	29.4811		+			-0.157121	1.31308	-0.36043	0.67029	G_PP1_G_WT	glideosome-associated connector	PBANKA_1137800.1-p1	78	78	38.7	38.7	38.7	291.41	0	323.31	18198000000
NaN	NaN	NaN	NaN	23.5622	24.687	24.5803	24.6181	24.5213	24.0661	23.2162	22.8825	23.5047	23.3773	22.9476	NaN	NaN	NaN	NaN	NaN	NaN	NaN	NaN	NaN	NaN	NaN	NaN	NaN	NaN	NaN		+			-0.314729	1.30892	0	0	G_PP1_G_WT	conserved Plasmodium protein, unknown function	PBANKA_0508600.1-p1	6	6	17.3	17.3	17.3	54.093	0	61.976	213880000
NaN	24.7529	NaN	NaN	25.5953	26.6748	26.8436	26.9397	26.6918	26.5122	25.3023	25.3252	25.7105	25.3757	25.4257	26.0333	23.3627	25.708	26.2756	26.2626	26.3016	27.2984	27.4767	27.4134	27.1135	26.1402	26.0579	25.9751	25.8352	26.1501	+	+		+	-1.81756	1.30452	-0.503258	1.08902	G_I2_G_WT;G_PP1_G_WT;S_PP1_S_WT	ubiquitin-like protein, putative	PBANKA_0823000.1-p1	23	23	23.8	23.8	23.8	161.46	0	219.33	1996900000
NaN	NaN	NaN	NaN	NaN	NaN	NaN	NaN	NaN	NaN	NaN	NaN	NaN	NaN	NaN	26.5667	26.1592	26.64	26.3512	27.0776	26.8406	26.7712	26.9199	27.3437	27.5377	26.6899	26.1077	26.1586	26.424	26.2256					0	0	0.237765	0.761444		myosin A	PBANKA_1355700.1-p1	21	21	28.9	28.9	28.9	92.342	0	181.77	1196600000
NaN	NaN	NaN	NaN	NaN	25.288	25.0211	25.265	25.2799	24.6992	24.4491	24.4007	23.7719	23.5602	NaN	NaN	NaN	NaN	NaN	NaN	24.4791	25.113	25.4702	25.1117	25.199	24.3555	24.2407	24.7626	24.1896	24.4434	+	+	+		-1.0691	1.30329	-2.07887	0.67624	G_I2_G_WT;G_PP1_G_WT;S_I2_S_WT	lysophospholipase, putative	PBANKA_1220200.1-p1	9	9	32.3	32.3	32.3	78.113	0	125.57	457040000
NaN	NaN	NaN	NaN	NaN	26.6501	26.2804	26.4444	26.5069	26.3896	25.2095	25.2012	25.1174	25.2627	24.9698	NaN	NaN	NaN	25.7495	25.0543	26.1049	26.4808	26.6991	26.7221	26.7961	25.9552	25.4208	25.6726	25.544	25.5033	+	+	+		-2.69149	1.30216	-1.91523	0.94143	G_I2_G_WT;G_PP1_G_WT;S_I2_S_WT	coatomer subunit gamma, putative	PBANKA_0903900.1-p1	17	17	20.9	20.9	20.9	113.49	0	119.64	1349300000
25.4287	25.5424	25.0477	25.4079	25.4177	27.2733	27.1415	27.5043	27.3412	27.1123	25.8559	25.8979	26.1444	26.3383	25.6902	25.0832	24.5575	25.3965	25.2564	25.4262	26.3438	26.3611	26.7961	26.8743	27.0937	25.6564	24.5488	26.1203	26.0616	26.0851		+			-0.616448	1.28918	-0.550494	0.999344	G_PP1_G_WT	exportin-1, putative	PBANKA_0401500.1-p1	28	28	28.2	28.2	28.2	146.65	0	204.46	2098600000
NaN	NaN	NaN	NaN	NaN	23.8729	23.1513	23.5387	23.7946	23.7465	NaN	NaN	NaN	NaN	NaN	NaN	NaN	NaN	NaN	NaN	NaN	NaN	23.5062	23.5487	23.4873	NaN	NaN	NaN	NaN	22.9982		+			0	1.28839	0.0745605	0.220905	G_PP1_G_WT	GTP-binding protein, putative	PBANKA_1326000.1-p1	7	7	7.1	7.1	7.1	153.36	0	8.7123	131420000
NaN	23.8017	NaN	NaN	23.6993	24.6039	24.2966	24.1685	24.2824	24.3698	22.891	23.217	23.1185	23.0409	23.0129	NaN	NaN	NaN	NaN	NaN	NaN	NaN	NaN	NaN	NaN	NaN	NaN	NaN	NaN	NaN		+			0.0866837	1.28818	0	0	G_PP1_G_WT	conserved Plasmodium protein, unknown function	PBANKA_1030400.1-p1	7	7	11.4	11.4	11.4	90.472	0	15.659	199220000
28.1024	28.2423	28.1381	27.932	27.9993	29.514	29.2368	28.8238	29.2092	29.1824	28.7971	28.4968	29.1964	29.1487	28.4368	27.0678	26.8542	27.0165	26.5312	27.2842	27.8196	27.8079	28.3589	28.2836	28.3253	28.0001	25.4929	27.5355	28.0982	27.7694					-0.732351	0.378051	-0.428444	0.739825		exportin-7, putative	PBANKA_0811300.1-p1	23	23	22.7	22.7	22.7	134.69	0	184.9	10818000000
24.2156	23.6634	NaN	NaN	23.6132	24.5063	23.9848	24.3103	24.4347	24.5273	23.3117	23.6341	23.6292	23.6586	NaN	23.5617	NaN	22.9548	23.6902	23.7696	23.6875	24.142	24.7804	24.5001	24.1456	NaN	NaN	NaN	NaN	23.5752		+		+	0.284505	1.28411	0.670586	1.64379	G_PP1_G_WT;S_PP1_S_WT	signal recognition particle subunit SRP54, putative	PBANKA_1313800.1-p1	5	5	12.2	12.2	12.2	55.801	0	7.2615	313630000
27.7401	27.7448	27.9868	27.5631	27.7782	26.9913	26.3844	26.707	27.1837	27.3201	26.7804	26.8286	26.7857	27.1161	27.1168	28.8455	28.8137	29.1635	28.9932	28.4716	29.0241	28.4074	29.0907	29.0307	28.8519	27.8978	27.879	28.1249	28.117	28.806	+				0.837079	-0.00823326	0.692575	0.716002	G_I2_G_WT	40S ribosomal protein S21, putative	PBANKA_0905000.1-p1	3	3	50	50	50	9.1904	0	308.1	6652500000
NaN	NaN	NaN	NaN	NaN	26.1244	25.1701	NaN	25.5008	25.2812	25.3676	25.3032	25.5407	25.7503	25.6815	NaN	NaN	NaN	NaN	NaN	NaN	NaN	25.8616	NaN	NaN	NaN	NaN	NaN	NaN	NaN	+				-2.8592	-0.656322	0	0.714935	G_I2_G_WT	YOP1-like protein, putative	PBANKA_1135000.1-p1	2	2	11.8	11.8	11.8	18.365	0	4.0756	824970000
NaN	NaN	NaN	NaN	NaN	23.4695	23.2538	23.099	22.9563	23.1927	NaN	NaN	NaN	NaN	NaN	NaN	NaN	NaN	NaN	NaN	NaN	NaN	NaN	NaN	NaN	NaN	NaN	NaN	NaN	NaN		+			0	1.28208	0	0	G_PP1_G_WT	conserved Plasmodium protein, unknown function	PBANKA_1033700.1-p1	4	4	15.3	15.3	15.3	35.902	0	26.149	81187000
26.9883	27.227	26.5951	26.7433	26.8287	27.9827	28.0158	27.7026	27.7129	27.6075	26.7533	26.4574	26.751	26.6005	26.0646	24.6599	24.4364	24.9396	24.7587	24.5584	24.5939	24.8064	25.3989	25.0758	24.5422	23.4251	22.6626	23.0079	22.1561	24.8145		+		+	0.351122	1.27896	1.45736	1.67021	G_PP1_G_WT;S_PP1_S_WT	RuvB-like helicase 1, putative	PBANKA_1427700.1-p1	14	14	35.9	35.9	35.9	57.85	0	145.18	2289700000
26.2441	26.8597	26.1504	25.5614	26.6596	27.8206	27.8071	28.0501	28.003	27.8491	26.6436	26.7799	26.7356	26.5676	26.4235	26.6418	26.7719	26.7691	26.8445	26.8057	27.5667	27.7725	28.1346	28.0718	28.0346	27.1659	26.7843	26.7234	26.9982	27.2645		+			-0.335013	1.27593	-0.220646	0.928786	G_PP1_G_WT	26S protease regulatory subunit 4, putative	PBANKA_1206600.1-p1	14	12	43	43	37.6	49.709	0	323.31	3992700000
NaN	NaN	NaN	NaN	NaN	23.9671	23.8291	23.6802	23.7303	23.5447	23.9703	23.704	23.7621	24.3902	23.6326	NaN	NaN	NaN	NaN	NaN	NaN	23.1734	23.2265	23.1553	23.2533	NaN	NaN	NaN	23.4462	NaN	+				-1.78008	-0.141523	0.208077	0.704267	G_I2_G_WT	conserved Plasmodium protein, unknown function	PBANKA_1452500.1-p1	6	6	11.5	11.5	11.5	81.031	0	12.854	181170000
NaN	NaN	NaN	NaN	NaN	25.021	24.7734	24.8855	24.9368	24.5707	23.4873	23.3867	23.4828	23.7578	23.7233	NaN	NaN	NaN	NaN	NaN	23.5772	23.6067	23.8349	24.0769	24.5202	23.1537	22.8275	23.201	23.2049	23.3378		+			-0.71692	1.26994	-0.699194	0.778205	G_PP1_G_WT	malate:quinone oxidoreductase, putative	PBANKA_1116300.1-p1	5	5	11.3	11.3	11.3	59.225	0	47.614	314690000
NaN	NaN	NaN	NaN	NaN	NaN	NaN	NaN	NaN	NaN	NaN	NaN	NaN	NaN	NaN	25.5858	25.3744	25.2843	25.8242	25.3559	25.2139	24.7482	25.4247	25.1589	24.9643	24.6776	24.6216	23.9542	23.8596	24.895					0	0	1.08335	0.700432		inner membrane complex protein 1c	PBANKA_1202000.1-p1	5	5	18.7	18.7	18.7	32.557	0	17.276	481560000
NaN	NaN	NaN	NaN	NaN	24.3002	23.3822	23.528	23.4423	23.5083	22.4058	22.2406	22.7239	22.2782	NaN	NaN	NaN	NaN	NaN	NaN	NaN	NaN	22.8717	NaN	22.8041	NaN	NaN	NaN	NaN	NaN		+			-0.451262	1.26838	0	0.820616	G_PP1_G_WT	type II NADH:ubiquinone oxidoreductase	PBANKA_0816000.1-p1	3	3	7	7	7	63.13	0	6.6426	133100000
26.2881	26.2873	26.1179	26.0729	26.4883	27.1173	27.3315	27.5836	27.6747	27.4536	26.244	25.9297	26.0256	26.3384	26.2911	26.4592	26.6308	26.3837	25.9944	26.0147	26.3407	25.1635	26.2388	26.1828	24.9905	NaN	NaN	NaN	25.1828	26.2622		+	+	+	0.0851395	1.26637	2.93092	2.41766	G_PP1_G_WT;S_I2_S_WT;S_PP1_S_WT	trailer hitch homolog	PBANKA_1301300.1-p1	12	12	51	51	51	39.068	0	323.31	2235800000
23.7433	24.8777	23.4259	23.8209	24.1743	26.3816	26.0039	26.2997	26.3496	26.2662	24.8674	25.1839	25.4128	24.9748	24.5381	24.0545	24.1355	23.9258	24.7896	24.8111	25.6082	25.7479	26.5424	26.4933	25.9989	24.5268	24.0277	24.837	25.2123	24.5612	+	+		+	-0.986959	1.26482	-0.289698	1.44515	G_I2_G_WT;G_PP1_G_WT;S_PP1_S_WT	peptide chain release factor subunit 1, putative	PBANKA_0309100.1-p1	13	13	40	40	40	48.366	0	49.663	1121600000
26.9904	27.9594	26.042	26.1132	26.7633	27.221	27.0264	27.0181	27.1677	26.9558	26.4258	26.5335	26.9605	26.9119	26.6234	26.5225	26.5157	25.8049	26.4204	26.2368	27.1712	26.941	27.0976	27.0146	26.9595	26.5179	25.639	26.5462	26.6218	26.382					0.0826412	0.386778	-0.0413151	0.69538		casein kinase 2, alpha subunit	PBANKA_0938600.1-p1	13	12	49.9	49.9	44.2	39.972	0	140.4	2652000000
NaN	NaN	NaN	NaN	NaN	NaN	NaN	NaN	NaN	NaN	NaN	NaN	NaN	NaN	NaN	27.6849	27.0894	27.7591	27.1804	27.5192	26.6846	25.9582	26.5911	26.5823	26.5654	25.7054	26.2619	24.884	25.6383	26.4278			+		0	0	1.66316	0.69285	S_I2_S_WT	RNA-binding protein, putative	PBANKA_1409200.1-p1	5	5	40.3	40.3	40.3	17.405	0	35	1242900000
24.7107	24.8384	24.2049	24.5441	24.8531	25.722	25.5047	25.7182	25.8274	25.7392	25.3223	25.3383	25.4333	25.343	25.5473	24.1887	24.3517	24.6814	24.5194	24.9673	25.2244	25.6339	25.5388	25.8062	25.6413	24.92	24.5158	24.9449	25.1271	24.8942					-0.766579	0.305463	-0.338719	0.688526		spermidine synthase, putative	PBANKA_0919300.1-p1	5	5	19.6	19.6	19.6	36.588	0	11.889	869090000
NaN	25.5446	23.7953	NaN	25.0946	24.0859	24.3707	24.1509	24.3269	24.3421	23.0266	22.9133	23.0638	22.9418	23.0274	22.2831	22.5544	NaN	NaN	22.2194	21.6871	NaN	21.3532	21.24	NaN	NaN	NaN	NaN	NaN	21.3004		+			0.853902	1.2607	0.0232399	-0.6027	G_PP1_G_WT	DNA replication complex GINS protein, putative	PBANKA_1349400.1-p1	6	6	12.7	12.7	12.7	59.361	0	8.2371	213280000
24.3332	25.3866	24.2089	25.4569	25.0044	25.3033	24.6525	25.0491	25.2082	24.9346	24.3413	24.4085	24.535	24.6508	24.5713	23.4836	NaN	23.5893	NaN	24.1029	23.5686	23.4944	23.8955	23.9495	24.0976	22.8852	22.4309	23.239	23.5346	23.4815					0.376617	0.528157	0.317702	0.686864		dihydrolipoyllysine-resid	PBANKA_1419100.1-p1	6	6	22	22	22	47.831	0	91.974	503470000
NaN	NaN	NaN	NaN	NaN	29.1984	28.791	28.9269	28.8827	28.9203	27.805	27.5683	27.835	27.7998	27.4079	NaN	NaN	NaN	NaN	NaN	28.7765	28.695	29.1542	28.7986	29.1144	28.777	NaN	28.243	28.4408	28.176	+	+	+		-5.00813	1.26069	-4.40781	1.90296	G_I2_G_WT;G_PP1_G_WT;S_I2_S_WT	signal recognition particle subunit SRP68, putative	PBANKA_1120800.1-p1	12	12	19.6	19.6	19.6	83.827	0	62.741	5406400000
NaN	NaN	NaN	NaN	NaN	26.0957	25.9522	26.2794	25.9983	26.0084	24.9216	24.9603	24.9069	24.6559	24.5983	NaN	NaN	NaN	23.89	25.5194	25.1723	25.1984	25.7314	25.6973	25.3202	24.8777	24.6264	24.938	24.1486	25.044	+	+			-2.37621	1.25818	-1.47686	0.69697	G_I2_G_WT;G_PP1_G_WT	conserved Plasmodium protein, unknown function	PBANKA_1320400.1-p1	10	10	15.7	15.7	15.7	78.946	0	23.738	911230000
NaN	NaN	NaN	NaN	NaN	25.5891	25.246	25.7917	25.6664	25.6574	24.2478	24.2671	24.2136	24.9617	23.9699	NaN	NaN	NaN	NaN	NaN	24.3047	25.319	25.6316	25.4066	25.6744	23.9303	23.3086	23.9005	24.2155	23.5679	+	+	+	+	-2.26049	1.25807	-1.72478	1.48271	G_I2_G_WT;G_PP1_G_WT;S_I2_S_WT;S_PP1_S_WT	eukaryotic translation initiation factor 3 subunit G, putative	PBANKA_0715200.1-p1	8	8	37.2	37.2	37.2	31.554	0	220.8	594010000
24.5662	24.4204	23.9273	24.4653	24.5126	25.1048	24.6977	24.6577	24.8854	24.7163	23.7064	23.8784	24.2977	24.1346	NaN	NaN	NaN	NaN	NaN	NaN	NaN	NaN	NaN	NaN	NaN	NaN	NaN	NaN	NaN	NaN		+			0.823839	1.25788	0	0	G_PP1_G_WT	conserved Plasmodium protein, unknown function	PBANKA_0102700.1-p1	6	6	18.3	18.3	18.3	44.5	0	25.364	320670000
NaN	NaN	NaN	NaN	NaN	23.1511	22.9764	23.2747	23.2971	22.9228	NaN	NaN	NaN	NaN	NaN	NaN	NaN	NaN	NaN	NaN	NaN	NaN	22.795	NaN	NaN	NaN	NaN	NaN	NaN	NaN		+			0	1.25595	0	0.794032	G_PP1_G_WT	myosin F, putative	PBANKA_1344100.1-p1	6	6	4	4	4	228.25	0	7.8395	76751000
30.7627	30.7505	30.4912	30.5758	30.6318	31.7159	31.7951	31.6793	31.6371	31.4401	31.1957	31.1458	31.2148	31.3122	31.1202	30.9834	30.8259	30.8761	31.1137	31.1189	31.9061	32.2322	32.3143	32.4018	32.4787	31.7345	31.3316	31.6149	31.6752	31.6132					-0.555348	0.455759	-0.610275	0.672728		actin I	PBANKA_1459300.1-p1	27	23	74.2	74.2	62	41.884	0	323.31	71586000000
NaN	NaN	NaN	NaN	NaN	23.9199	23.4219	23.6486	23.5652	23.152	NaN	22.3796	22.656	22.373	NaN	NaN	NaN	NaN	NaN	NaN	NaN	NaN	NaN	NaN	22.5187	NaN	NaN	NaN	NaN	NaN		+			0.688198	1.24794	0	0.0369473	G_PP1_G_WT	kinetochore protein NUF2, putative	PBANKA_0414300.1-p1	6	6	16.2	16.2	16.2	53.635	0	5.1433	100670000
NaN	25.0626	NaN	24.8503	25.2397	27.4126	26.5131	27.2577	27.3107	26.8206	25.5406	25.7555	25.8456	26.0197	25.9924	24.6388	NaN	24.4567	24.4566	24.6537	26.0594	26.4873	26.7391	26.9385	26.8235	24.9513	25.0996	25.5912	25.7205	25.4502	+	+		+	-1.8502	1.23217	-1.22014	1.247	G_I2_G_WT;G_PP1_G_WT;S_PP1_S_WT	eukaryotic translation initiation factor 3 subunit A, putative	PBANKA_1428700.1-p1	22	22	21.1	21.1	21.1	152.45	0	323.31	1792200000
NaN	NaN	NaN	NaN	NaN	25.0047	25.1035	24.9269	24.7972	24.7669	24.1404	23.8541	23.6528	24.3529	NaN	NaN	NaN	NaN	NaN	NaN	NaN	NaN	NaN	NaN	NaN	NaN	NaN	NaN	NaN	NaN	+	+			-1.79249	1.23077	0	0	G_I2_G_WT;G_PP1_G_WT	origin recognition complex subunit 2, putative	PBANKA_0803000.1-p1	5	5	9	9	9	91.7	0	9.2582	242710000
NaN	NaN	NaN	NaN	NaN	NaN	NaN	NaN	22.4292	NaN	NaN	NaN	NaN	NaN	NaN	NaN	NaN	NaN	NaN	NaN	23.7133	22.9933	24.4679	23.8703	23.8446	NaN	NaN	23.504	23.3639	24.4537					0	-0.0458164	-0.980651	0.66498		pre-mRNA-splicing factor PRP46, putative	PBANKA_0401000.1-p1	3	3	12.1	12.1	12.1	71.343	0	39.624	172700000
NaN	25.3605	25.0598	25.0741	25.2358	25.5473	25.224	25.5635	25.5262	25.3608	24.6871	24.8295	25.155	25.1119	25.0274	24.8706	24.8675	24.8052	24.8549	25.1028	25.0416	25.0375	25.6303	26.0587	25.9038	25.0254	24.2377	25.0024	25.3122	24.8423					-0.1847	0.482197	0.0162258	0.65038		importin-7, putative	PBANKA_0803600.1-p1	19	19	16.9	16.9	16.9	143.63	0	57.456	919950000
NaN	NaN	NaN	24.4224	24.5388	26.5603	26.144	26.524	26.4966	25.8278	25.1398	24.9209	25.2946	25.0327	25.0133	25.3768	25.3931	25.9829	26.4026	25.9264	26.693	27.3021	27.9079	27.5687	27.756	26.5201	26.1617	26.4618	26.3066	26.4155	+	+		+	-1.90537	1.23027	-0.556773	1.07239	G_I2_G_WT;G_PP1_G_WT;S_PP1_S_WT	heat shock protein 101	PBANKA_0931200.1-p1	30	30	42.4	42.4	42.4	103.2	0	239.16	1896800000
25.2861	25.2617	25.1768	25.2936	24.7364	25.8968	25.7419	25.6136	25.8416	25.6848	25.3398	25.5248	25.6399	25.8346	25.5122	24.6189	25.0179	25.2555	24.8567	25.3411	24.7205	24.963	25.2704	25.4426	25.7497	24.8565	NaN	25.1031	24.976	25.1183					-0.41933	0.185465	0.436798	0.648035		importin beta, putative	PBANKA_1422400.1-p1	9	9	15.5	15.5	15.5	100.41	0	19.242	1027900000
NaN	NaN	NaN	NaN	NaN	NaN	NaN	NaN	NaN	NaN	NaN	NaN	NaN	NaN	NaN	26.533	26.2175	26.6742	25.8399	27.2718	24.885	24.7607	24.6823	24.5793	24.6922	24.7103	24.0694	23.3672	24.2074	24.008			+		0	0	2.43482	0.647474	S_I2_S_WT	duffy-binding protein	PBANKA_1332700.1-p1	11	11	15.4	15.4	15.4	95.716	0	323.31	553430000
28.0285	27.9044	27.5236	27.5222	27.4018	28.4141	28.4227	28.3021	28.2694	28.2844	27.7416	27.8094	28.1091	28.1364	27.7979	27.1984	27.0321	27.2626	27.1949	27.3264	27.6023	27.6213	27.8664	27.9403	27.898	27.1706	26.6469	27.3048	27.3835	27.1963					-0.242759	0.419683	0.0624512	0.645226		FAD-dependent glycerol-3-phosphate dehydrogenase, putative	PBANKA_0404800.1-p1	20	20	43.1	43.1	43.1	71.138	0	323.01	5459200000
24.4987	24.7444	23.6901	23.2096	24.6219	27.3002	27.632	27.5645	27.4383	27.5324	25.1855	26.0257	26.3862	26.697	27.0292	23.0528	22.4847	23.9491	23.6127	22.9223	22.8947	23.4166	25.101	25.1771	24.7278	21.8984	NaN	NaN	22.8269	23.1514	+	+		+	-2.11177	1.22879	0.489766	1.54889	G_I2_G_WT;G_PP1_G_WT;S_PP1_S_WT	conserved Plasmodium protein, unknown function	PBANKA_1214700.1-p1	26	26	36.7	36.7	36.7	112.04	0	240.08	1558200000
NaN	NaN	NaN	NaN	NaN	NaN	NaN	NaN	NaN	NaN	NaN	NaN	NaN	NaN	NaN	25.5893	24.7515	25.8183	25.6349	26.3716	24.895	24.1713	24.6503	24.7568	24.8654	24.7946	NaN	NaN	25.0569	25.0535					0	0	1.60751	0.64217		StAR-related lipid transfer protein, putative	PBANKA_0208900.1-p1	7	7	17.2	17.2	17.2	51.15	0	13.588	385590000
NaN	NaN	NaN	NaN	24.5401	24.1943	24.3184	24.082	23.9661	24.4066	NaN	23.4089	23.4696	23.4347	23.2281	NaN	NaN	NaN	NaN	NaN	NaN	NaN	22.9749	22.6912	NaN	NaN	22.9882	NaN	22.6713	NaN		+			-0.0984837	1.22866	0.499895	0.252973	G_PP1_G_WT	glutamine--fructose-6-phosphate aminotransferase [isomerizin	PBANKA_0509300.1-p1	6	6	9.2	9.2	9.2	85.012	0	7.3805	209290000
23.9394	23.6741	23.6968	23.7568	24.1325	25.0089	24.2425	24.2716	24.2966	23.9424	24.7229	24.6487	24.7006	25.0417	24.7298	23.3657	22.6809	NaN	25.6137	23.3791	23.4183	23.1396	23.6587	23.5123	24.0294	NaN	NaN	23.9119	24.2558	NaN	+				-0.928799	-0.41633	0.629221	0.638072	G_I2_G_WT	aspartate--tRNA ligase, putative	PBANKA_0210200.1-p1	8	8	12.4	12.4	12.4	81.205	0	10.123	389960000
30.6364	30.6075	30.7116	30.795	30.771	32.0546	31.4349	31.6386	31.7811	31.571	31.9293	31.8795	31.9943	32.1074	31.9579	30.2186	29.8978	30.5011	30.0684	31.1124	31.236	31.2228	31.5615	31.6119	31.5781	30.9774	29.5129	31.2416	31.5988	30.698	+				-1.26937	-0.277643	-0.446049	0.636323	G_I2_G_WT	heat shock protein 90, putative	PBANKA_0805700.1-p1	48	42	58.6	58.6	52.1	83.213	0	323.31	60430000000
NaN	NaN	NaN	NaN	NaN	23.3367	23.9872	23.4674	22.5765	23.2771	NaN	NaN	NaN	NaN	NaN	NaN	NaN	NaN	NaN	NaN	NaN	22.442	22.3873	21.9441	22.5769	NaN	NaN	NaN	NaN	NaN		+			0	1.22278	0	0.321722	G_PP1_G_WT	conserved Plasmodium protein, unknown function	PBANKA_1106100.1-p1	4	4	2.5	2.5	2.5	345.45	0	20.763	124050000
NaN	NaN	NaN	NaN	NaN	26.7613	26.814	27.513	26.8567	27.346	25.9189	25.8093	25.8372	25.8311	25.791	NaN	NaN	NaN	NaN	NaN	24.5423	NaN	24.869	24.7509	24.8498	NaN	NaN	24.1039	24.4886	24.5476	+	+			-3.33843	1.22071	-0.966658	0.585307	G_I2_G_WT;G_PP1_G_WT	citrate synthase, mitochondrial, putative	PBANKA_0506700.1-p1	11	11	20.8	20.8	20.8	65.199	0	43.43	1197700000
NaN	NaN	NaN	NaN	NaN	NaN	NaN	NaN	NaN	NaN	NaN	NaN	NaN	NaN	NaN	NaN	NaN	NaN	NaN	NaN	23.1024	22.8236	23.3206	23.3677	23.0821	22.8189	22.9314	22.8969	NaN	22.8956					0	0	-0.113175	0.633043		protein transport protein Sec24B, putative	PBANKA_1002800.1-p1	4	4	3.5	3.5	3.5	158.42	0	5.9923	61334000
25.9874	26.3448	25.5305	26.0164	26.6051	26.865	26.8203	26.8528	27.4825	26.4197	25.4999	25.3994	25.9922	25.8175	25.6317	NaN	24.0859	NaN	22.6845	23.5563	23.2309	NaN	23.0188	22.5835	NaN	23.0227	NaN	22.879	24.7086	24.1724		+			0.428716	1.21993	-0.663857	-1.24214	G_PP1_G_WT	WD repeat-containing protein 66, putative	PBANKA_0415800.1-p1	22	22	25.7	25.7	25.7	130.74	0	149.25	1164000000
NaN	NaN	NaN	NaN	NaN	24.6502	24.8609	24.8672	24.6292	24.8005	23.5951	23.7522	23.5689	23.3869	23.4165	NaN	NaN	NaN	NaN	NaN	NaN	NaN	23.7068	23.4656	23.3403	NaN	NaN	23.4373	NaN	23.7975		+			-0.741402	1.21765	-0.252896	0.183838	G_PP1_G_WT	cytoplasmic dynein intermediate chain, putative	PBANKA_0504500.1-p1	7	7	12.7	12.7	12.7	76.9	0	56.757	282520000
29.5575	29.5021	29.3476	29.446	29.5226	30.7632	30.3384	30.5374	30.5935	30.5947	30.1425	30.1037	30.2552	30.3422	30.0972	29.284	29.1007	29.3559	29.3415	29.8581	29.8547	29.6731	30.1504	30.2141	30.2027	29.4607	28.5129	29.5926	29.9698	29.4074					-0.713007	0.377271	-0.000659561	0.630316		endoplasmin, putative	PBANKA_1437300.1-p1	40	40	50.1	50.1	50.1	93.244	0	323.31	24875000000
NaN	NaN	NaN	NaN	NaN	26.4406	25.9927	26.5652	26.153	26.8377	25.4078	25.2068	25.4306	25.0772	24.9319	25.7058	25.7572	25.4659	25.7401	25.6676	25.9678	26.1092	26.3052	26.3218	26.3926	25.4863	25.4452	25.6134	25.6847	25.7834	+	+			-3.03193	1.18699	0.0647228	0.616738	G_I2_G_WT;G_PP1_G_WT	protein transport protein SEC13, putative	PBANKA_1445400.1-p1	6	6	10.3	10.3	10.3	76.699	0	45.809	1163200000
26.5272	26.6738	26.1328	26.505	26.6183	27.7347	27.4216	27.6339	27.5011	27.5638	26.3703	26.4769	26.4877	26.3403	26.2453	25.9999	26.0218	25.9399	25.5751	26.1162	25.8134	25.2823	26.0506	26.0044	26.0262	25.5816	25.5238	25.5008	25.4112	25.8231		+			0.107351	1.1869	0.36251	0.267312	G_PP1_G_WT	succinyl-CoA ligase [ADP-forming] subunit beta, putative	PBANKA_1013200.1-p1	9	9	24.5	24.5	24.5	51.535	0	164.85	2390400000
27.3223	27.7494	26.9488	27.3847	27.673	29.3558	28.8972	29.4857	29.495	29.4518	27.987	28.1393	28.2624	28.2601	28.1064	27.9887	27.7506	27.8543	28.2016	28.0338	29.4933	30.0804	30.3091	30.236	30.3156	28.6601	27.9159	28.6612	28.6831	28.588		+		+	-0.735401	1.18605	-0.535857	1.58523	G_PP1_G_WT;S_PP1_S_WT	60S acidic ribosomal protein P0, putative	PBANKA_0918000.1-p1	16	16	71.1	71.1	71.1	34.86	0	323.31	12784000000
24.8035	24.4216	23.6734	NaN	24.3934	26.3502	25.8091	25.9504	26.2013	25.7239	25.0588	24.7634	24.8223	24.6302	24.8315	27	27.0676	27.1974	27.1276	27.2978	27.0571	26.5879	27.4023	27.3953	27.2335	26.8269	26.6126	26.9423	27.0198	27.4188		+			-1.00589	1.18574	0.174026	0.171166	G_PP1_G_WT	RNA-binding protein musashi, putative	PBANKA_0817700.1-p1	11	11	30.2	30.2	30.2	40.234	0	71.433	2003200000
NaN	NaN	NaN	NaN	NaN	25.8405	24.7345	25.8598	25.7333	25.5974	24.5039	24.2801	24.4061	24.327	24.3207	NaN	NaN	NaN	NaN	NaN	23.5308	24.4715	24.3472	24.7197	24.5849	24.1789	NaN	23.2398	23.1978	NaN	+	+			-1.67164	1.18554	-0.626992	1.20856	G_I2_G_WT;G_PP1_G_WT	nuclear movement protein, putative	PBANKA_1350600.1-p1	7	7	19.2	19.2	19.2	41.775	0	13.651	500200000
26.5407	25.9335	26.2097	26.2722	26.0709	27.225	27.3105	26.9842	26.9335	26.9988	27.207	27.1238	27.3194	27.7196	27.3055	25.8444	25.4276	26.2886	25.9157	26.4535	27.2848	27.2609	27.3119	27.663	27.4706	27.0964	25.6994	27.0146	27.6508	26.4508	+				-1.12967	-0.244643	-0.79642	0.615868	G_I2_G_WT	ADP-ribosylation factor, putative	PBANKA_0505100.1-p1	10	8	69.1	69.1	55.2	20.862	0	93.023	2967700000
31.1184	31.2761	30.9735	30.9892	31.3073	31.9482	31.7184	31.6468	31.5606	31.5539	31.2831	31.2388	31.3744	31.2816	31.1577	30.656	30.673	30.72	30.7941	30.7458	31.3351	31.2796	31.5981	31.448	31.577	30.7048	30.3611	30.8769	30.9271	31.3055					-0.134234	0.41845	-0.117301	0.612458		pyruvate kinase, putative	PBANKA_1125600.1-p1	27	27	65.4	65.4	65.4	55.547	0	323.31	59337000000
25.0958	25.426	24.0962	NaN	25.0811	25.6514	25.5064	25.6157	25.4984	25.5416	24.9199	25.2551	25.3813	25.0737	25.1752	25.426	25.6411	25.4453	25.5813	25.1218	25.9312	25.7719	26.0931	25.8266	25.8294	24.9076	25.2283	25.1584	25.363	25.7399					-0.734866	0.401641	0.163672	0.610992		conserved Plasmodium protein, unknown function	PBANKA_1019700.1-p1	14	14	16.7	16.7	16.7	136.89	0	121.1	1064400000
NaN	NaN	NaN	NaN	NaN	23.7225	24.4094	24.5502	24.0527	24.2707	23.313	23.864	23.8207	24.4606	NaN	NaN	NaN	NaN	NaN	NaN	NaN	NaN	23.7318	23.0585	22.7794	23.3758	NaN	NaN	23.5255	NaN					-0.878382	0.715414	-0.0617001	0.610631		translation initiation factor eIF-1A, putative	PBANKA_0905600.1-p1	2	2	19.4	19.4	19.4	17.846	0	34.746	245040000
NaN	NaN	NaN	NaN	NaN	27.0908	27.4572	26.9409	26.9461	26.9945	27.4636	27.5688	27.6068	26.959	26.869	26.4136	NaN	26.9273	27.0271	NaN	27.2261	27.0677	27.4506	27.1751	27.4532	27.7403	27.5089	NaN	27.5829	27.8248	+				-4.49562	-0.207531	-1.8013	0.607843	G_I2_G_WT	elongation factor G, putative	PBANKA_0101200.1-p1	2	2	3.3	3.3	3.3	106.34	0.0013749	2.3343	2886000000
NaN	NaN	NaN	NaN	NaN	22.9125	23.2225	23.3418	23.1549	23.1524	NaN	NaN	NaN	22.3679	NaN	NaN	NaN	NaN	NaN	NaN	NaN	NaN	NaN	NaN	NaN	NaN	NaN	NaN	NaN	NaN		+			0.686645	1.18167	0	0	G_PP1_G_WT	condensin-2 complex subunit G2, putative	PBANKA_1312000.1-p1	3	3	2.6	2.6	2.6	141.52	0	3.6375	69040000
NaN	NaN	NaN	NaN	NaN	25.2201	25.1999	25.3437	25.2619	25.3256	24.2454	24.2429	24.2615	23.9398	23.7693	NaN	NaN	NaN	NaN	NaN	NaN	NaN	NaN	NaN	NaN	NaN	NaN	NaN	NaN	NaN	+	+			-1.16514	1.17845	0	0	G_I2_G_WT;G_PP1_G_WT	conserved Plasmodium protein, unknown function	PBANKA_0940000.1-p1	5	5	32.7	32.7	32.7	20.287	0	18.902	323300000
24.7499	24.9289	24.2399	24.3086	25.2211	26.0407	25.8502	25.7851	25.9236	25.4574	24.5528	24.5837	24.8586	24.9157	24.2826	NaN	NaN	NaN	NaN	NaN	NaN	NaN	23.3214	22.6293	NaN	NaN	NaN	NaN	NaN	NaN		+			0.0510101	1.17273	0	0.15848	G_PP1_G_WT	P-loop containing nucleoside triphosphate hydrolase, putative	PBANKA_0404300.1-p1	11	11	15.5	15.5	15.5	106.31	0	45.178	552250000
24.5617	24.3888	24.5685	24.2438	24.4655	25.1178	25.1441	25.0351	24.9817	24.6361	23.8746	23.6758	24.0264	23.5538	23.9239	NaN	24.2414	24.479	23.9381	24.6306	24.1275	24.7542	24.6756	24.8064	24.5916	23.6279	23.5478	23.613	23.5694	23.4989		+		+	0.634736	1.17205	0.356668	1.01966	G_PP1_G_WT;S_PP1_S_WT	elongation factor Tu, putative	PBANKA_1345600.1-p1	7	6	14	14	12.2	53.73	0	16.561	552570000
NaN	NaN	NaN	NaN	NaN	23.8763	23.0946	23.4865	23.3785	23.0576	NaN	NaN	22.5839	NaN	NaN	NaN	NaN	NaN	NaN	NaN	NaN	NaN	NaN	NaN	NaN	NaN	NaN	NaN	NaN	NaN	+	+			1.12367	1.16683	0	0	G_I2_G_WT;G_PP1_G_WT	microtubule-associated protein RP/EB family, putative	PBANKA_0405600.1-p1	2	2	5.3	5.3	5.3	50.616	0	12.658	76349000
24.54	24.5993	24.0464	NaN	24.2212	25.2757	24.9933	24.6431	24.7701	24.8622	23.6134	23.3135	23.9231	23.8648	24.0036	NaN	NaN	NaN	NaN	NaN	NaN	NaN	NaN	NaN	NaN	NaN	NaN	NaN	NaN	NaN		+			0.247349	1.1652	0	0	G_PP1_G_WT	NIMA related kinase 4	PBANKA_0616700.1-p1	6	6	23.2	23.2	23.2	36.488	0	94.472	282620000
NaN	NaN	NaN	NaN	NaN	23.1781	23.0402	23.1778	23.5099	23.2012	NaN	NaN	NaN	NaN	NaN	NaN	NaN	NaN	NaN	NaN	NaN	NaN	NaN	NaN	NaN	NaN	NaN	NaN	NaN	NaN		+			0	1.16478	0	0	G_PP1_G_WT	conserved Plasmodium protein, unknown function	PBANKA_0933800.1-p1	2	2	4.7	4.7	4.7	84.57	0	12.827	71035000
24.6169	24.4428	25.1375	24.1842	26.1247	27.2052	25.9228	26.5312	26.7652	26.6353	26.4706	26.6037	26.3277	25.7933	25.8261	27.9699	27.8789	27.938	27.8583	28.0517	27.8809	27.6591	28.1622	28.3087	28.4104	26.9977	27.1543	27.4637	27.8801	28.0291	+				-1.30305	0.40764	0.434396	0.579306	G_I2_G_WT	kelch domain-containing protein, putative	PBANKA_0922500.1-p1	19	19	40.5	40.5	40.5	63.44	0	242.87	3527900000
26.6147	26.3372	23.7379	NaN	25.2364	25.4178	25.5563	25.3897	25.4663	25.1347	25.2571	24.9127	25.0119	25.3802	25.3201	25.3136	NaN	25.9332	25.403	25.3178	24.5878	24.0245	24.4308	24.6389	24.6464	24.2691	NaN	24.3882	24.299	24.2831					-0.174676	0.216526	1.07992	0.578941		pyrroline-5-carboxylate reductase, putative	PBANKA_1134200.1-p1	6	6	30.8	30.8	30.8	28.329	0	53.494	824490000
NaN	NaN	NaN	NaN	NaN	24.4267	24.9821	24.0646	24.593	24.2505	24.553	24.399	24.6562	25.3297	24.7255	NaN	NaN	NaN	NaN	NaN	NaN	NaN	24.041	24.6406	24.5146	NaN	NaN	24.8268	24.7747	NaN	+				-2.65192	-0.269317	-0.538185	0.578821	G_I2_G_WT	ATP synthase subunit beta, mitochondrial	PBANKA_1450300.1-p1	10	10	42.4	32.8	32.8	57.884	0	214.6	334370000
NaN	NaN	NaN	NaN	NaN	NaN	NaN	NaN	NaN	NaN	NaN	NaN	NaN	NaN	NaN	24.61	24.966	24.1877	25.2478	23.5964	NaN	23.8722	24.6594	24.5611	24.4647	NaN	24.9065	24.2572	NaN	24.8595					0	0	1.01098	0.577737		BRO1 domain-containing protein, putative	PBANKA_1439100.1-p1	9	9	12.9	12.9	12.9	99.187	0	13.627	244750000
NaN	NaN	NaN	NaN	NaN	23.0393	22.945	23.5731	23.759	23.1325	22.7114	NaN	NaN	22.7213	22.8012	NaN	NaN	NaN	NaN	NaN	NaN	NaN	NaN	NaN	NaN	NaN	NaN	NaN	NaN	NaN		+			0.112424	1.15687	0	0	G_PP1_G_WT	conserved Plasmodium protein, unknown function	PBANKA_1208800.1-p1	3	3	12.5	12.5	12.5	40.712	0	5.9664	84427000
NaN	NaN	NaN	NaN	NaN	25.1658	25.4081	25.7438	25.5124	24.9093	24.3151	24.1648	24.1181	24.2731	24.1008	NaN	NaN	NaN	NaN	NaN	26.5538	26.9594	27.2867	27.1655	27.0419	25.1982	24.7364	25.3279	25.2283	25.3433	+	+	+	+	-1.63247	1.1535	-2.35076	1.83462	G_I2_G_WT;G_PP1_G_WT;S_I2_S_WT;S_PP1_S_WT	60S ribosomal protein L31, putative	PBANKA_1103400.1-p1	2	2	18.5	18.5	18.5	13.982	0	62.017	1122000000
27.0224	27.3894	26.8344	26.9726	27.1548	28.6542	28.2446	28.6462	28.7363	28.7656	27.5045	27.3568	27.4944	27.5807	27.3443	27.9096	27.7818	27.8638	28.4083	27.4398	29.8374	30.0634	30.3793	30.259	30.2562	28.2389	27.6899	28.2907	28.12	28.5862		+		+	-0.381442	1.15323	-0.304459	1.97393	G_PP1_G_WT;S_PP1_S_WT	40S ribosomal protein S3, putative	PBANKA_1329300.1-p1	11	11	49.1	49.1	49.1	24.736	0	254.25	10590000000
26.1069	26.0972	26.2139	26.3338	26.7784	27.8441	27.1984	27.472	27.4489	27.2061	27.0444	27.0653	27.2807	27.3813	27.0337	26.3954	26.271	26.1514	26.3627	26.4765	27.0818	26.7848	27.2822	27.5025	27.3404	26.8322	25.9516	26.6628	27.0985	26.6338	+				-0.855028	0.272815	-0.304366	0.562569	G_I2_G_WT	dynamin-like protein, putative	PBANKA_0903600.1-p1	23	23	36.1	36.1	36.1	93.519	0	214.33	3038500000
NaN	24.7991	25.1195	25.2519	NaN	25.8811	25.8187	25.6145	25.9128	25.6604	25.562	25.2146	25.6224	25.951	25.6732	25.4341	24.7407	24.9949	24.8674	25.1539	25.8306	25.6705	25.9427	26.245	26.1489	25.2853	24.6704	25.5361	26.2149	25.3539	+				-1.51395	0.17287	-0.373935	0.555412	G_I2_G_WT	acyl-CoA synthetase, putative	PBANKA_1453300.1-p1	13	13	22.3	22.3	22.3	87.002	0	56.596	1118100000
25.1435	25.0568	24.9367	25.0559	25.3598	25.2453	24.9732	25.2183	25.4178	25.2561	25.4737	25.386	25.5792	25.3889	25.1483	25.1559	24.5641	24.941	24.5858	25.0765	24.8433	24.0743	25.0383	25.2193	24.7261	23.9899	NaN	23.5647	24.8374	25.4333					-0.284662	-0.1731	0.636125	0.551743		glycerol-3-phosphate dehydrogenase [NAD(+)], putative	PBANKA_1431900.1-p1	7	7	17.9	17.9	17.9	41.27	0	25.614	751960000
NaN	NaN	NaN	NaN	22.2298	NaN	NaN	NaN	NaN	21.2979	21.6855	22.8198	21.5894	21.2278	NaN	24.5504	24.1488	23.9646	23.9046	24.8059	22.8486	22.9949	22.9986	23.2327	22.7094	22.1684	22.2556	22.452	22.2792	22.875			+		0.70708	0.143945	1.86883	0.550809	S_I2_S_WT	zinc finger protein, putative	PBANKA_1415900.1-p1	4	4	35.2	35.2	35.2	18.754	0	72.422	136780000
26.4517	26.5896	26.1648	26.2058	26.1152	25.6636	25.2678	25.6643	25.7759	25.5751	25.5469	25.9649	26.2952	26.0149	25.8381	26.7154	26.6132	26.7822	26.4145	26.4655	25.97	25.6131	26.3293	26.3835	25.9727	25.2762	25.6096	25.178	25.4641	25.9869					0.37345	-0.342649	1.09517	0.550763		eukaryotic translation initation factor 4 gamma, putative	PBANKA_1411300.1-p1	15	15	18.2	18.2	18.2	118.03	0	174.9	1584000000
24.4358	26.1134	25.0285	25.5773	25.7039	26.2543	26.1683	26.4603	26.2335	26.3799	25.1119	25.27	25.4594	24.7929	25.138	26.7218	26.629	26.2786	26.8789	26.135	26.8075	26.9976	27.316	27.0655	27.0809	26.6414	26.6695	26.7727	26.5153	27.1048		+			0.217345	1.14484	-0.212094	0.312734	G_PP1_G_WT	conserved protein, unknown function	PBANKA_1426100.1-p1	22	22	39.6	39.6	39.6	72.001	0	266.49	1983400000
NaN	NaN	NaN	NaN	NaN	24.2316	23.472	23.2708	23.6797	23.7626	NaN	22.9416	22.2209	22.6032	NaN	NaN	NaN	NaN	NaN	NaN	NaN	NaN	22.724	22.9585	22.5551	NaN	NaN	NaN	NaN	NaN		+			0.127913	1.14058	0	0.365915	G_PP1_G_WT	V-type proton ATPase subunit D, putative	PBANKA_1355000.1-p1	4	4	28.9	28.9	28.9	27.976	0	21.603	118420000
NaN	NaN	NaN	NaN	24.2422	25.3017	25.0423	25.2119	25.4649	25.3604	24.044	23.8354	24.5069	24.2018	24.0934	NaN	NaN	NaN	NaN	NaN	23.3616	23.7143	23.9238	23.831	23.9958	22.3969	NaN	NaN	23.4684	23.3798	+	+		+	-1.09723	1.13995	0.31945	1.38744	G_I2_G_WT;G_PP1_G_WT;S_PP1_S_WT	conserved Plasmodium protein, unknown function	PBANKA_1201100.1-p1	13	13	16.8	16.8	16.8	106.81	0	79.451	437150000
NaN	NaN	NaN	NaN	NaN	24.3142	23.8213	24.0486	23.535	23.7011	NaN	23.26	23.6862	23.0566	NaN	NaN	NaN	NaN	NaN	NaN	NaN	NaN	NaN	NaN	NaN	NaN	NaN	NaN	NaN	NaN		+			-0.0164536	1.13898	0	0	G_PP1_G_WT	spindle pole body protein, putative	PBANKA_0402100.1-p1	7	7	5.1	5.1	5.1	217.57	0	8.2902	134030000
NaN	NaN	NaN	NaN	NaN	24.2241	24.0666	NaN	NaN	24.2614	NaN	23.8121	24.5232	23.7924	NaN	25.4606	25.2906	25.3131	25.3245	25.4771	25.1828	25.7875	25.81	25.9825	25.6582	25.5244	24.558	25.1235	25.8129	24.7219					-0.443156	0.453065	0.225067	0.53606		V-type H(+)-translocating pyrophosphatase, putative	PBANKA_1320500.1-p1	12	12	17.6	17.6	17.6	76.116	0	39.162	573930000
30.9563	30.3878	30.4904	30.7051	30.655	31.631	31.5622	31.4237	31.3062	31.4485	30.9873	30.8722	31.2134	31.0716	31.0364	30.5468	30.3173	30.6202	30.314	31.2838	30.8889	30.4345	30.942	30.917	30.9613	30.3233	29.4959	30.6967	31.0028	29.9639					-0.397259	0.438135	0.319882	0.532199		heat shock protein 70, putative	PBANKA_0914400.1-p1	24	24	42.4	42.4	42.4	73.165	0	323.31	39388000000
28.901	28.9865	28.6517	28.6819	28.8957	29.2912	29.0732	29.1199	29.0503	29.057	28.7935	28.6688	28.8199	28.6647	28.4827	27.3336	27.2593	27.3692	27.3864	27.3211	27.2885	27.4524	27.9572	27.58	27.5312	26.9681	26.4259	27.0896	26.9564	27.7108					0.137471	0.43241	0.303767	0.531702		DNA replication licensing factor MCM7, putative	PBANKA_0803100.1-p1	39	39	50.5	50.5	50.5	94.671	0	323.31	7902900000
NaN	NaN	23.2423	23.3724	NaN	26.0283	25.0026	25.7905	25.9526	25.811	24.5873	24.665	24.4147	25.0248	24.2091	NaN	NaN	23.4589	NaN	24.1613	25.121	25.2083	25.2222	25.6055	25.6636	NaN	NaN	NaN	24.5127	NaN	+	+		+	-1.73054	1.13682	0.995381	3.10422	G_I2_G_WT;G_PP1_G_WT;S_PP1_S_WT	conserved Plasmodium protein, unknown function	PBANKA_1033100.1-p1	3	3	12.2	12.2	12.2	30.48	0	56.96	725790000
NaN	NaN	NaN	NaN	25.2271	26.4494	26.0863	25.8016	26.0068	25.7479	24.7832	24.7831	25.3257	24.9261	24.594	NaN	NaN	NaN	NaN	NaN	NaN	NaN	23.3262	NaN	23.5005	NaN	NaN	NaN	NaN	23.4481	+	+			-1.36849	1.13598	0.234964	0.139931	G_I2_G_WT;G_PP1_G_WT	zinc finger protein, putative	PBANKA_0100800.1-p1	18	18	19.2	19.2	19.2	157.45	0	288.82	621180000
26.1058	27.321	26.0661	25.7317	27.3806	28.2544	28.2459	28.2775	28.1303	27.809	26.9771	27.0308	27.396	27.0047	26.6306	27.5725	27.1573	26.9581	27.2232	27.0007	28.7609	29.1887	29.3708	29.3401	29.5285	27.8929	28.1487	27.8643	27.6968	28.108		+		+	-0.486776	1.13557	-0.759812	1.29565	G_PP1_G_WT;S_PP1_S_WT	carbamoyl phosphate synthetase, putative	PBANKA_1406700.1-p1	58	58	35	35	35	247.64	0	323.31	6622900000
33.1728	32.8102	32.2989	32.5749	31.9606	32.2143	32.7372	32.3554	32.2107	32.3786	31.2613	31.1931	31.314	31.3312	31.1218	31.5203	31.7321	31.6519	31.8649	31.8697	31.7565	31.5786	31.8866	31.8254	31.8064	31.1227	30.6814	31.1306	31.3633	31.0473	+	+			1.31922	1.13499	0.658744	0.701659	G_I2_G_WT;G_PP1_G_WT	heat shock protein 70, putative	PBANKA_0818900.1-p1	39	39	55.9	55.9	55.9	72.146	0	323.31	95616000000
NaN	NaN	NaN	NaN	NaN	23.3452	23.0783	23.3062	23.2932	23.2349	NaN	NaN	22.149	NaN	NaN	NaN	NaN	NaN	NaN	NaN	NaN	NaN	NaN	NaN	NaN	NaN	NaN	NaN	NaN	NaN		+			0.399537	1.1303	0	0	G_PP1_G_WT	pantothenate transporter	PBANKA_0303900.1-p1	3	3	6.5	6.5	6.5	59.918	0	4.9606	80580000
NaN	NaN	NaN	NaN	NaN	23.8546	23.8029	21.735	23.675	24.1536	NaN	22.7856	NaN	23.008	NaN	NaN	NaN	NaN	NaN	NaN	NaN	23.3097	23.2098	22.5459	22.5073	NaN	NaN	NaN	NaN	NaN		+			0.33587	1.12541	0	0.0688747	G_PP1_G_WT	kinetochore protein NDC80, putative	PBANKA_1115700.1-p1	3	3	5.6	5.6	5.6	69.252	0	4.3387	137910000
NaN	NaN	NaN	NaN	NaN	25.2653	24.4985	24.3973	24.5261	24.5804	24.1155	24.0032	24.4135	24.0561	24.0235	NaN	NaN	NaN	NaN	NaN	NaN	NaN	24.1348	24.3693	24.461	23.8203	NaN	23.9242	23.9064	NaN	+				-1.53831	0.531137	-0.758834	0.517435	G_I2_G_WT	heat shock protein J2, putative	PBANKA_0938300.1-p1	10	10	24.1	24.1	24.1	63.467	0	28.18	340920000
29.0864	29.2755	28.9108	28.8752	29.1457	29.2065	29.0275	28.9925	28.9733	29.0359	28.637	28.6158	28.8982	28.5348	28.3807	27.3327	27.4749	27.531	27.2816	27.4473	27.2331	27.4168	27.862	27.537	27.338	26.812	26.6527	27.0133	26.7487	27.5767					0.445411	0.433819	0.452848	0.516717		DNA replication licensing factor MCM6, putative	PBANKA_1131600.1-p1	30	29	38.4	38.4	37.7	107.06	0	323.31	7982300000
NaN	NaN	NaN	NaN	NaN	24.504	23.6858	24.3619	24.386	23.6876	NaN	23.3865	23.194	23.149	22.8641	NaN	NaN	NaN	NaN	NaN	23.6357	23.7812	23.6387	24.2542	23.9577	23.0498	NaN	NaN	23.2244	23.4153		+			-0.475003	1.12067	-0.0585102	1.14053	G_PP1_G_WT	erythrocyte membrane associated protein 2	PBANKA_0316800.1-p1	4	4	14	14	14	45.193	0	6.1925	227900000
24.7273	24.5304	23.5001	NaN	24.0731	24.6122	24.6608	24.8121	25.2747	24.8364	23.5075	23.7584	23.9536	23.5963	23.7821	NaN	24.1624	24.3567	24.084	24.097	24.152	24.4023	24.6358	24.5853	24.4536	23.9961	23.7341	23.8912	24.4016	24.2833		+			0.237733	1.11968	-0.0290234	0.384554	G_PP1_G_WT	protein GCN20, putative	PBANKA_0926600.1-p1	14	14	22	22	22	90.13	0	39.071	533560000
NaN	26.0398	25.0865	25.5296	25.0695	26.5321	26.1171	26.3581	26.5121	26.4717	26.132	26.2655	26.2415	26.3039	26.0288	24.6	NaN	24.8893	25.212	25.2768	25.6312	25.5305	25.4822	25.773	25.7995	25.3461	24.8413	25.1487	25.2281	25.0924	+				-1.29948	0.203902	-0.623664	0.511956	G_I2_G_WT	eukaryotic translation initiation factor 4E, putative	PBANKA_0412800.1-p1	8	8	38.3	38.3	38.3	26.905	0	26.249	1339700000
25.1536	26.1471	25.048	24.937	24.9799	27.2458	26.9941	26.746	27.3643	26.4524	27.2874	26.8952	27.5917	27.708	27.1032	NaN	NaN	25.6917	24.1488	24.8108	26.2541	25.9506	26.3705	26.3659	26.2112	26.035	23.7209	26.5968	27.1086	25.1457	+				-2.06399	-0.356596	-1.90272	0.50905	G_I2_G_WT	polyadenylate-binding protein 1, putative	PBANKA_1439200.1-p1	23	23	35.7	35.7	35.7	93.314	0	196.17	1973700000
NaN	NaN	NaN	NaN	NaN	22.6328	23.0604	23.0441	22.6575	23.08	NaN	NaN	NaN	NaN	NaN	NaN	NaN	NaN	NaN	NaN	NaN	22.8624	22.6916	22.6107	22.4409	NaN	NaN	NaN	NaN	NaN		+			0	1.10989	0	0.544535	G_PP1_G_WT	cullin-like protein, putative	PBANKA_1128600.1-p1	5	5	5.5	5.5	5.5	120.09	0	4.6046	76787000
NaN	NaN	NaN	NaN	NaN	24.5209	24.6012	24.4485	24.727	24.9812	NaN	23.8693	24.1353	24.5257	22.9174	NaN	NaN	NaN	NaN	NaN	26.3376	27.077	27.4076	27.2866	27.4015	24.0951	23.7391	25.3797	25.041	25.3662	+	+	+	+	-1.36002	1.1041	-2.3678	2.37785	G_I2_G_WT;G_PP1_G_WT;S_I2_S_WT;S_PP1_S_WT	60S ribosomal protein L35ae, putative	PBANKA_0906400.1-p1	6	6	41.3	41.3	41.3	16.483	0	123.38	1036000000
NaN	NaN	NaN	NaN	NaN	22.8271	22.5378	22.742	22.7155	23.0421	NaN	NaN	NaN	NaN	NaN	NaN	NaN	NaN	NaN	NaN	NaN	22.7366	23.6139	23.4114	NaN	NaN	NaN	NaN	NaN	NaN					0	0.400646	0	0.50024		conserved Plasmodium protein, unknown function	PBANKA_0524000.1-p1	4	4	6.1	6.1	6.1	140.87	0	22.675	79866000
NaN	NaN	NaN	NaN	NaN	24.0345	23.3934	23.7725	23.5008	23.8141	23.0258	NaN	22.9564	23.2478	NaN	NaN	NaN	NaN	NaN	NaN	NaN	NaN	NaN	NaN	NaN	NaN	NaN	NaN	NaN	NaN		+			-0.32478	1.10275	0	0	G_PP1_G_WT	E1-E2 ATPase, putative	PBANKA_1361600.1-p1	6	6	4.3	4.3	4.3	201.05	0	9.0063	103630000
NaN	NaN	NaN	NaN	NaN	23.6662	23.0782	23.8588	23.9391	23.7435	NaN	NaN	NaN	23.1052	NaN	NaN	NaN	NaN	NaN	NaN	23.5812	23.5551	23.7325	24.1175	NaN	NaN	NaN	NaN	NaN	NaN		+			-0.245674	1.10133	0	1.0569	G_PP1_G_WT	signal peptidase complex subunit 3, putative	PBANKA_0417000.1-p1	3	3	17.3	17.3	17.3	21.833	0	13.011	157490000
NaN	24.6193	23.5491	24.5515	24.7425	27.9609	26.4557	27.9317	27.6589	27.7333	26.0692	26.2758	26.7268	26.9413	26.3852	24.4529	24.5978	24.6939	26.9569	NaN	24.6836	26.0817	26.5672	26.4884	26.8305	25.5449	24.2034	25.4901	25.7041	25.3674	+	+			-2.52362	1.06846	-0.56508	0.868288	G_I2_G_WT;G_PP1_G_WT	tudor staphylococcal nuclease, putative	PBANKA_0912300.1-p1	27	27	30.4	30.4	30.4	117.85	0	199.18	2276700000
NaN	NaN	NaN	NaN	NaN	23.3435	23.54	23.5725	23.3596	23.4335	22.9724	23.1615	23.2595	22.7913	22.7406	23.7223	NaN	NaN	23.5524	24.0465	23.3511	23.9032	23.8274	24.0044	23.8526	23.3373	23.5252	23.044	23.1612	23.402					-0.0648327	0.464754	-0.439889	0.493821		mini-chromosome maintenance complex-binding protein, putative	PBANKA_1030500.1-p1	6	6	10.6	10.6	10.6	107.17	0	15.044	222970000
NaN	NaN	NaN	NaN	NaN	24.1138	24.027	24.6818	24.3299	24.1039	23.6742	23.6034	23.81	23.985	23.5291	25.7396	25.1785	25.1921	25.124	25.2263	24.4647	24.785	24.8838	25.0123	24.8435	24.1972	24.0914	24.36	24.4743	24.4257	+				-1.41818	0.530922	0.982384	0.488152	G_I2_G_WT	conserved Plasmodium membrane protein, unknown function	PBANKA_0403800.1-p1	6	6	11.2	11.2	11.2	86.379	0	126.8	499640000
NaN	NaN	NaN	NaN	NaN	24.6957	24.5584	24.9032	25.1169	25.3567	23.7541	23.8696	23.8327	24.0414	23.8109	NaN	NaN	NaN	NaN	NaN	NaN	NaN	NaN	NaN	NaN	NaN	NaN	NaN	NaN	NaN	+	+			-1.4629	1.06443	0	0	G_I2_G_WT;G_PP1_G_WT	WD repeat-containing protein, putative	PBANKA_1428300.1-p1	11	11	13.2	13.2	13.2	144.53	0	19.57	258770000
NaN	NaN	NaN	25.1258	25.3973	24.7771	24.7836	25.1176	24.7712	24.7413	25.0304	25.3061	24.6996	24.1954	25.2345	26.1196	25.4364	26.1662	26.3388	26.6204	NaN	NaN	25.1054	24.4151	24.7087	NaN	NaN	25.0069	NaN	26.3622	+		+		-1.38735	-0.0550621	2.93533	0.482921	G_I2_G_WT;S_I2_S_WT	pyridoxine biosynthesis protein PDX2, putative	PBANKA_0931800.1-p1	3	3	29.6	29.6	29.6	25.675	0	17.785	798190000
22.1744	24.2315	23.166	22.6163	25.7637	28.2236	26.5809	27.4845	27.7771	26.922	27.5459	27.3103	27.6501	27.2918	27.2575	29.5312	30.0325	30.0655	29.1841	30.626	30.5374	29.7536	30.1506	30.7003	30.942	30.2065	29.2109	30.2489	30.5647	29.4443	+				-3.82074	-0.0135014	-0.0471893	0.481753	G_I2_G_WT	merozoite surface protein 1	PBANKA_0831000.1-p1	70	70	40.5	40.5	40.5	198.67	0	323.31	13914000000
NaN	NaN	NaN	NaN	NaN	25.0653	24.8151	24.9732	24.9804	24.9463	24.0759	23.842	24.0899	23.7123	23.7455	NaN	NaN	NaN	NaN	NaN	23.9141	23.7394	24.1437	23.6031	23.9421	23.6601	23.3442	23.4218	23.228	23.5769	+	+			-1.42175	1.06294	-1.00648	0.422274	G_I2_G_WT;G_PP1_G_WT	cytosolic iron-sulfur protein assembly protein 1, putative	PBANKA_0607800.1-p1	6	6	14.2	14.2	14.2	75.474	0	55.601	363080000
NaN	NaN	NaN	NaN	NaN	23.8169	23.0335	23.2919	23.0321	23.3888	22.6481	22.9505	22.6036	NaN	NaN	NaN	NaN	NaN	NaN	NaN	NaN	NaN	NaN	NaN	NaN	NaN	NaN	NaN	NaN	NaN		+			0.779969	1.05891	0	0	G_PP1_G_WT	conserved Plasmodium protein, unknown function	PBANKA_1005800.1-p1	3	3	6.5	6.5	6.5	55.187	0.00049751	3.1061	84637000
NaN	NaN	NaN	NaN	NaN	23.5548	23.2243	23.7343	23.4574	23.3254	22.4761	NaN	23.121	22.3253	22.8354	22.9902	22.9653	NaN	23.0566	23.2258	22.9	22.688	22.8236	22.9893	22.6309	NaN	22.5968	NaN	22.5889	23.0247		+			0.782764	1.05162	0.188346	0.280204	G_PP1_G_WT	mRNA-decapping enzyme subunit 1, putative	PBANKA_0515900.1-p1	4	4	4.8	4.8	4.8	115.66	0	10.364	162960000
25.5438	26.0891	25.3312	25.4942	26.1136	26.398	26.0142	26.4761	26.613	26.7005	25.5958	25.4034	25.517	25.3558	25.0772	24.9059	24.4568	24.5028	24.6735	23.9406	23.5037	23.6551	24.9565	23.7145	23.5767	23.736	23.8472	23.9926	23.6884	24.6192		+			0.324522	1.05054	0.519222	-0.0953789	G_PP1_G_WT	kinesin-13, putative	PBANKA_1458300.1-p1	20	20	26.5	26.5	26.5	117.18	0	99.519	1111700000
26.4249	26.541	26.3201	26.3398	26.7107	27.1792	27.6392	27.6108	27.3619	27.4969	26.1286	26.6252	26.5125	26.4065	26.3633	26.7316	26.7958	26.7424	26.7482	26.8538	27.2739	27.4069	27.7022	27.819	27.5841	26.6787	26.505	26.7637	26.8113	27.1459		+			0.0600784	1.05039	-0.00658035	0.776309	G_PP1_G_WT	26S proteasome regulatory subunit RPN3, putative	PBANKA_1351800.1-p1	19	19	44.2	44.2	44.2	58.536	0	156.13	3307700000
NaN	NaN	NaN	NaN	NaN	25.0671	25.0238	24.9322	24.8542	24.8956	23.7617	23.7428	24.1737	23.8586	24.0089	NaN	NaN	NaN	NaN	NaN	NaN	NaN	NaN	NaN	NaN	NaN	NaN	NaN	NaN	NaN	+	+			-1.51068	1.04542	0	0	G_I2_G_WT;G_PP1_G_WT	conserved Plasmodium protein, unknown function	PBANKA_0411300.1-p1	7	7	16.2	16.2	16.2	65.713	0	48.933	270900000
26.259	26.2702	25.8263	26.3762	26.3403	26.4543	26.3057	25.8222	25.9363	26.0717	25.7085	25.5974	26.3773	26.0097	25.7587	24.0223	24.4539	NaN	NaN	24.1458	NaN	NaN	24.2166	NaN	23.4807	NaN	NaN	NaN	NaN	NaN					0.324077	0.227726	1.08593	0.466174		conserved protein, unknown function	PBANKA_1108000.1-p1	10	10	35.9	35.9	35.9	45.617	0	255.77	948080000
NaN	NaN	NaN	NaN	NaN	23.6103	23.7785	23.6713	23.5224	23.286	NaN	NaN	23.009	NaN	NaN	NaN	NaN	NaN	NaN	NaN	NaN	NaN	NaN	NaN	NaN	NaN	NaN	NaN	NaN	NaN		+			-0.185287	1.03595	0	0	G_PP1_G_WT	conserved Plasmodium protein, unknown function	PBANKA_1444600.1-p1	4	4	6.3	6.3	6.3	82.916	0	6.1948	97375000
25.0131	24.9219	24.1414	24.5265	25.0093	24.2104	24.3715	24.021	24.3553	24.1927	24.1834	23.8212	24.2272	24.1207	24.2113	23.6159	23.9342	23.8288	22.6624	23.2714	NaN	NaN	23.2453	NaN	NaN	NaN	NaN	NaN	NaN	23.2193					0.609654	0.117409	1.2227	0.463218		zinc finger protein, putative	PBANKA_0828000.1-p1	12	12	12.9	12.9	12.9	142.19	0	49.62	320590000
NaN	25.2983	25.211	NaN	23.8598	24.3553	24.4723	24.431	24.4886	24.3295	23.6073	24.1854	23.9311	23.8363	23.849	24.0364	24.2738	24.5151	24.3564	24.2515	24.0264	23.7519	24.9932	24.6714	24.3695	23.6504	23.881	NaN	24.6347	24.4905					0.107355	0.533528	0.38508	0.460909		conserved Plasmodium protein, unknown function	PBANKA_0605400.1-p1	7	7	13.3	13.3	13.3	80.762	0	126.03	456270000
28.3176	28.2106	27.9214	27.6233	28.0907	28.0867	27.9744	27.934	27.9598	27.9096	27.6722	27.6366	27.7887	27.8345	27.4958	26.202	26.2806	26.2084	26.4076	26.0262	26.0642	25.5272	26.3492	25.9529	25.7248	24.179	25.1905	25.716	25.6963	26.5441					0.347189	0.287351	0.759756	0.458485		DNA ligase I, putative	PBANKA_1402600.1-p1	26	26	34.1	34.1	34.1	102.7	0	323.31	3564500000
NaN	NaN	NaN	NaN	NaN	23.4127	23.0652	23.4521	23.2527	23.1337	NaN	NaN	NaN	NaN	NaN	NaN	NaN	NaN	NaN	NaN	NaN	NaN	NaN	23.2839	NaN	NaN	NaN	NaN	NaN	NaN		+			0	1.02166	0	-0.0910294	G_PP1_G_WT	conserved Plasmodium protein, unknown function	PBANKA_1359300.1-p1	7	7	1.6	1.6	1.6	630.32	0	23.604	84648000
24.8079	24.965	24.4669	24.621	24.2429	24.243	24.5814	24.5943	24.0923	24.3437	NaN	23.7436	23.7861	23.3806	23.4448	23.0812	22.8147	23.4695	23.1169	NaN	NaN	23.1714	22.9834	NaN	23.1002	NaN	NaN	22.5531	NaN	22.974	+	+			1.2698	1.02001	0.613318	0.0243515	G_I2_G_WT;G_PP1_G_WT	single-stranded DNA-binding protein, putative	PBANKA_1235200.1-p1	4	4	19.4	19.4	19.4	36.029	0	55.612	300060000
27.3706	27.6011	26.947	27.4554	27.353	28.3178	28.243	28.3794	28.2947	28.3618	27.9972	27.9589	28.1562	28.3332	28.0491	26.7183	26.4899	26.7314	26.6284	27.2676	27.6814	27.5955	27.9309	27.9402	28.0896	27.772	26.5567	27.7391	28.0279	26.9196					-0.753498	0.220433	-0.635934	0.444474		nucleosome assembly protein, putative	PBANKA_0602700.1-p1	18	18	46.4	46.4	46.4	40.318	0	149.2	5155600000
NaN	24.8702	23.9354	NaN	25.3269	25.7614	25.3609	25.2243	25.3501	25.3109	24.5557	24.4807	24.9908	24.7113	23.1732	26.9923	26.6594	26.7566	27.1395	26.9172	26.9598	27.2469	27.5401	27.4279	27.6836	26.6918	26.4761	26.454	26.4805	26.7087		+			-0.644085	1.01919	0.330754	0.809451	G_PP1_G_WT	acetyl-CoA synthetase, putative	PBANKA_1126500.1-p1	18	18	26.6	26.6	26.6	107.7	0	287.31	1849000000
NaN	NaN	NaN	NaN	NaN	NaN	NaN	24.4524	NaN	NaN	NaN	NaN	NaN	NaN	NaN	NaN	NaN	NaN	NaN	NaN	24.2096	24.8723	24.832	24.7084	25.2062	NaN	NaN	NaN	NaN	NaN		+		+	0	1.01702	0	2.73046	G_PP1_G_WT;S_PP1_S_WT	nucleolar protein 5, putative	PBANKA_1207000.1-p1	6	6	17.1	17.1	17.1	53.172	0	10.505	188530000
NaN	NaN	NaN	NaN	NaN	23.7099	22.8002	23.295	23.169	22.8962	23.5471	NaN	NaN	23.1208	NaN	NaN	NaN	NaN	NaN	NaN	23.3651	24.4511	24.2394	24.541	24.5177	23.2777	NaN	23.3742	23.5479	23.1575		+		+	0.303348	1.01227	0.0783478	1.31265	G_PP1_G_WT;S_PP1_S_WT	conserved Plasmodium protein, unknown function	PBANKA_0924800.1-p1	6	6	15.4	15.4	15.4	135.57	0	13.363	188610000
30.2266	30.5211	30.003	30.1438	30.6072	30.8164	30.7078	30.6741	30.5866	30.5638	30.2816	30.3869	30.4817	30.1713	30.3094	30.3223	30.1849	30.3855	30.2463	30.2009	30.7656	30.9422	31.0391	31.075	31.0146	30.3851	30.496	30.4395	30.527	30.7965					-0.025835	0.343547	-0.260857	0.438459		eukaryotic initiation factor 4a, putative	PBANKA_1331900.1-p1	31	30	66.6	66.6	64.6	45.369	0	323.31	35071000000
28.8306	28.626	28.7149	28.5913	28.6952	29.4363	29.2163	29.3135	29.248	29.2843	29.0888	29.0565	29.1389	29.1992	28.9102	28.5344	28.7397	28.6984	28.4715	28.6468	28.9956	28.8636	29.1326	29.1806	29.025	28.4679	28.071	28.8554	28.9697	28.6643					-0.387133	0.220954	0.0124973	0.433834		heat shock protein 60, putative	PBANKA_1214000.1-p1	29	29	58	58	58	62.246	0	323.31	11517000000
24.1895	23.7984	23.9747	NaN	24.2759	24.1056	23.8958	24.0122	23.9223	24.1954	23.8453	24.0044	23.8649	23.5544	23.5824	24.5743	24.3088	24.3848	24.4595	24.1463	24.1593	23.7127	24.3836	24.0416	24.1018	NaN	23.6597	23.9857	23.5368	24.5611					-0.0852924	0.255957	0.726542	0.431596		endonuclease/exonuclease/phosphatase family protein, putative	PBANKA_0806100.1-p1	8	8	10.9	10.9	10.9	98.427	0	12.857	388200000
NaN	25.474	25.5721	25.4219	24.7947	25.8436	25.717	25.4423	25.5221	25.647	25.0529	24.9597	25.2823	25.1379	25.1059	NaN	NaN	NaN	NaN	NaN	NaN	NaN	NaN	24.2249	24.179	NaN	NaN	NaN	NaN	NaN					-0.291402	0.526669	0	0.42518		serine/threonine protein phosphatase 2B catalytic subunit A	PBANKA_1227400.1-p1	9	9	28.4	28.4	28.4	61.095	0	71.683	613670000
NaN	NaN	NaN	NaN	NaN	24.7472	24.8154	24.7259	24.6832	24.959	24.2827	23.6352	23.7854	23.7026	23.4795	NaN	NaN	NaN	NaN	NaN	NaN	NaN	NaN	NaN	NaN	NaN	NaN	NaN	NaN	NaN		+			-0.878601	1.00907	0	0	G_PP1_G_WT	serine/threonine protein kinase PK9, putative	PBANKA_1413600.1-p1	5	5	19.2	19.2	19.2	42.493	0	12.152	226080000
24.5378	24.5516	24.5086	NaN	24.4571	24.9541	25.7587	25.2136	24.865	24.9401	24.0692	24.1489	24.2465	24.0956	24.1493	25.2757	24.7369	25.313	26.0703	24.737	25.8424	25.8073	25.9835	26.0188	25.9458	25.2403	25.3158	25.4437	25.4721	25.7032		+			0.0720459	1.00438	-0.208451	0.484554	G_PP1_G_WT	mannose-6-phosphate isomerase, putative	PBANKA_1228400.1-p1	17	17	29.2	29.2	29.2	95.518	0	108.67	877320000
24.3893	24.574	24.3752	23.9272	24.3532	24.4763	23.9402	24.0914	23.8813	24.1086	24.0592	24.0941	23.9406	23.8726	23.7975	NaN	24.5017	24.3586	24.6252	24.5079	24.1247	NaN	24.0457	24.4919	NaN	NaN	NaN	NaN	NaN	25.0421					0.370986	0.146748	1.50866	0.419011		elongation factor Tu, putative	PBANKA_0831800.1-p1	8	8	12.1	12.1	12.1	93.476	0	12.619	374870000
NaN	NaN	NaN	NaN	23.624	26.044	25.098	25.8603	25.4448	26.2634	24.7285	24.591	24.9333	25.071	24.3756	26.266	26.1689	24.8673	26.5832	25.5869	27.9951	28.0243	28.2511	28.2584	28.0609	26.1219	24.7988	26.4191	26.6808	26.5902	+	+		+	-2.07128	1.00225	-0.227689	1.99582	G_I2_G_WT;G_PP1_G_WT;S_PP1_S_WT	40S ribosomal protein S19, putative	PBANKA_1416300.1-p1	5	5	41.4	41.4	41.4	16.876	0	44.496	2175700000
25.2847	24.7961	24.6084	24.6688	25.5066	NaN	25.6267	25.3993	24.2891	25.232	25.1005	25.2546	25.0178	24.892	25.0401	24.5967	NaN	25.4966	NaN	NaN	24.5458	NaN	24.6793	24.6441	24.4516	NaN	NaN	24.303	24.9108	25.1603					-0.0880867	-0.848301	-0.188577	0.415005		ubiquitin-conjugating enzyme E2, putative	PBANKA_0821900.1-p1	4	4	34.4	34.4	34.4	18.725	0	25.528	597820000
NaN	NaN	NaN	24.3023	24.8335	26.1802	25.9754	26.1612	26.266	26.1349	25.8243	25.7967	25.6875	25.9484	25.5792	NaN	24.1555	24.6183	24.5164	25.2662	25.4617	25.6398	26.0475	26.0695	25.9204	25.5066	24.743	25.5651	25.8382	25.4701	+				-2.43338	0.376336	-1.1697	0.403167	G_I2_G_WT	eukaryotic translation initiation factor 3 subunit M, putative	PBANKA_0720300.1-p1	15	15	33.9	33.9	33.9	51.417	0	100.41	1106700000
25.7854	25.8476	24.7039	25.5218	25.5928	27.2719	26.6554	27.1838	27.3348	27.2744	25.4731	25.9627	26.6684	26.2384	26.4121	25.6893	25.6524	24.0807	26.6298	24.7894	27.8024	29.0938	28.9747	28.7721	28.8446	26.7085	25.8454	27.0444	26.9005	27.1311		+		+	-0.660668	0.9931	-1.35766	1.97156	G_PP1_G_WT;S_PP1_S_WT	40S ribosomal protein S11, putative	PBANKA_0807600.1-p1	7	6	39.1	39.1	32.9	18.72	0	22.846	3695700000
25.7793	25.9816	25.5153	25.3893	26.3713	26.4835	26.3077	26.2643	26.2577	26.0878	25.992	25.8327	26.0417	25.8075	25.6558	25.8361	25.9753	25.6628	25.4844	25.48	26.1204	25.7902	25.8429	26.0171	25.831	25.3097	25.4674	25.5694	25.4115	25.8311					-0.0585457	0.414268	0.169907	0.402492		membrane associated histidine-rich protein 1b	PBANKA_1145900.1-p1	11	11	36.7	36.7	36.7	31.76	0	34.309	1386500000
NaN	24.6051	24.5136	24.8234	25.3644	25.1366	25.0905	25.1404	25.0817	25.0322	24.9133	25.2058	25.3427	24.9418	25.3185	NaN	NaN	NaN	24.0609	23.9194	NaN	NaN	NaN	NaN	23.8588	NaN	NaN	NaN	NaN	24.1691					-0.807024	-0.0481308	0.761256	0.401775		MAATS1 domain-containing protein, putative	PBANKA_1420700.1-p1	12	12	23.1	23.1	23.1	73.757	0	52.035	490720000
NaN	NaN	NaN	NaN	24.4116	23.3986	23.7675	23.153	23.0361	22.4647	22.9882	22.8176	22.6338	22.8173	22.3135	26.9866	27.0524	27.2462	27.1138	27.3466	26.8007	26.5395	26.9787	26.793	26.8283	26.3163	26.1074	26.5007	26.3928	26.6186					0.324274	0.449876	0.761953	0.400881		fam-a protein	PBANKA_1246161.1-p1;PBANKA_0112721.1-p1	8	7	34.7	34.7	30.2	30.955	0	83.412	1363100000
NaN	NaN	NaN	NaN	NaN	24.2304	24.2677	24.0822	23.6105	24.2174	23.6137	23.4184	23.612	23.2782	NaN	NaN	NaN	NaN	NaN	NaN	NaN	NaN	22.9717	22.7367	NaN	NaN	NaN	NaN	NaN	NaN		+			-0.177419	0.986737	0	-0.205968	G_PP1_G_WT	conserved Plasmodium protein, unknown function	PBANKA_0924100.1-p1	5	5	15.5	15.5	15.5	43.107	0	23.931	189850000
NaN	NaN	NaN	NaN	NaN	24.8313	25.0537	24.4009	24.8261	24.351	24.667	24.4126	24.4689	24.165	NaN	NaN	NaN	NaN	NaN	NaN	25.9122	25.0396	25.5323	25.3632	25.5135	25.0164	25.2292	24.9315	24.9269	25.2754	+		+		-1.37893	0.795123	-2.56738	0.396282	G_I2_G_WT;S_I2_S_WT	transcription elongation factor s-II, putative	PBANKA_1421100.1-p1	5	5	16.1	16.1	16.1	42.989	0	17.745	506300000
24.6272	24.81	24.4697	24.2159	24.3941	23.9747	23.9281	23.7741	23.5215	23.8118	23.9568	23.8808	24.0996	24.0921	23.7342	24.2952	24.309	24.0027	23.3827	23.7688	NaN	NaN	22.773	NaN	22.487	NaN	NaN	NaN	NaN	23.3001			+		0.550684	-0.150638	2.17611	0.393557	S_I2_S_WT	ribonuclease H2 subunit C, putative	PBANKA_0816200.1-p1	7	7	26.8	26.8	26.8	36.779	0	57.53	292670000
NaN	25.5049	22.7231	25.2669	24.9711	25.3294	25.306	25.5073	25.456	25.4152	24.7872	24.8374	25.8262	25.5876	25.5724	24.7073	23.9963	24.4054	24.0496	24.1309	24.7717	25.3295	25.5163	25.3858	25.6301	24.9068	24.5593	25.0222	25.7924	24.3867					-1.09022	0.0806335	-0.675576	0.393188		Plasmodium exported protein (PHIST), unknown function	PBANKA_1229000.1-p1	17	17	27.4	27.4	27.4	131.47	0	49.902	849530000
NaN	NaN	NaN	NaN	NaN	23.1534	23.2631	23.4432	23.2162	23.4237	NaN	NaN	NaN	22.955	NaN	NaN	NaN	NaN	NaN	NaN	NaN	NaN	NaN	23.1522	NaN	NaN	NaN	NaN	NaN	NaN		+			-0.0531704	0.983105	0	0.603259	G_PP1_G_WT	conserved protein, unknown function	PBANKA_1425400.1-p1	6	6	2.8	2.8	2.8	288.3	0	3.704	140080000
NaN	NaN	NaN	NaN	NaN	25.4299	25.0691	24.4585	24.5136	24.5651	25.1714	24.7898	24.957	25.1449	24.5347	24.9817	24.9699	25.0358	25.3838	25.6872	25.611	25.9464	25.8691	26.6129	26.398	26.1519	25.1036	25.7726	26.2152	25.2338	+				-2.51204	-0.112385	-0.48374	0.392063	G_I2_G_WT	glideosome-associated protein 50, putative	PBANKA_0819000.1-p1	7	7	23.8	23.8	23.8	44.306	0	26.235	839290000
NaN	NaN	NaN	NaN	NaN	25.4752	24.887	24.8263	25.3069	24.8597	25.433	25.4625	25.6453	25.8993	25.4245	23.1462	NaN	25.0827	NaN	24.7436	24.4816	24.4347	24.2243	24.4265	24.9565	25.0041	NaN	24.7213	25.481	NaN	+				-2.90588	-0.501901	-0.546427	0.390596	G_I2_G_WT	ras-related protein RAB7, putative	PBANKA_0418200.1-p1	7	4	43.7	43.7	28.6	23.718	0	15.444	592560000
NaN	NaN	NaN	NaN	NaN	22.5771	21.0519	22.825	22.6203	NaN	22.3913	22.424	NaN	NaN	NaN	27.86	27.8521	27.5396	26.8081	28.1966	26.4516	26.4933	26.9192	26.7618	27.79	26.8643	26.4561	26.1092	25.8898	27.1504					0.308087	-0.479729	1.15732	0.389232		rhoptry-associated leucine zipper-like protein 1, putative	PBANKA_0619700.1-p1	15	15	33.5	33.5	33.5	63.083	0	323.31	1603700000
25.1692	24.9083	24.6176	24.4656	25.1083	25.4194	25.1659	25.1573	25.0022	25.0898	24.8628	24.8968	24.8175	24.7033	24.7643	24.5487	23.947	24.2489	24.0806	24.0058	24.4567	23.8641	24.8433	24.4032	24.3173	NaN	24.069	24.8581	24.3696	24.8043					0.0448452	0.357959	0.177233	0.38795		CDT1-like protein, putative	PBANKA_1356300.1-p1	16	16	21.8	21.8	21.8	110.96	0	125.32	650490000
26.5341	26.8102	26.2758	26.6157	26.7473	27.696	26.9438	27.3627	27.305	27.3677	26.3628	26.3268	26.4509	26.5812	26.0626	26.5841	26.6087	26.6019	26.7908	26.1686	27.6603	28.5743	28.6737	28.5723	28.4683	26.9178	26.9294	27.0102	27.1004	27.0283		+		+	0.239756	0.978184	-0.44642	1.39257	G_PP1_G_WT;S_PP1_S_WT	60S ribosomal protein L23, putative	PBANKA_1346700.1-p1	4	4	38.1	38.1	38.1	14.974	0	80.382	4050600000
NaN	NaN	NaN	NaN	24.3652	25.6848	25.6488	25.6542	25.4234	25.6153	24.9141	24.3409	24.8052	24.5375	24.5599	NaN	NaN	NaN	NaN	NaN	NaN	NaN	24.4358	NaN	NaN	NaN	NaN	NaN	NaN	24.5987	+	+			-1.74265	0.973785	0.314065	-0.0545147	G_I2_G_WT;G_PP1_G_WT	conserved Plasmodium protein, unknown function	PBANKA_1407000.1-p1	8	8	21.5	21.5	21.5	53.612	0	32.364	465700000
25.2897	NaN	25.4296	24.1369	25.2262	26.3672	26.2435	26.3799	26.0969	26.2778	25.281	25.1423	25.4833	25.4546	25.1388	25.6823	25.3487	24.7996	25.4619	25.3056	25.8713	25.9315	26.3353	26.3589	26.1975	25.2455	25.3613	25.1176	25.9989	25.4069		+			-0.83048	0.973049	-0.106426	0.712851	G_PP1_G_WT	26S proteasome regulatory subunit RPN10, putative	PBANKA_1222900.1-p1	9	9	29.4	29.4	29.4	47.957	0	68.609	1307500000
NaN	NaN	NaN	NaN	NaN	NaN	NaN	24.6436	24.797	24.0106	23.3923	23.4892	23.5811	23.5546	23.4875	NaN	NaN	NaN	NaN	NaN	NaN	23.5174	NaN	NaN	NaN	NaN	NaN	NaN	23.4315	NaN					-0.397344	-0.381034	0.44418	0.380824		alkaline phosphatase, putative	PBANKA_0813400.1-p1	2	2	6.6	6.6	6.6	53.181	0	14.237	219100000
26.6782	27.3136	26.2114	26.3183	26.6986	27.2957	26.9488	26.8657	26.985	26.9594	26.6921	26.7626	26.7366	26.6403	26.8097	27.6297	27.6665	27.0132	27.9316	27.0763	28.2394	28.0345	28.4286	28.3849	28.3002	27.8457	27.6283	27.9132	27.8641	28.2416					-0.08424	0.282684	-0.435131	0.378924		casein kinase 1, putative	PBANKA_0912100.1-p1	14	14	36.8	36.8	36.8	37.672	0	78.465	4110700000
28.9616	28.6984	28.664	28.8305	28.2522	29.0298	29.1226	28.7671	28.7927	28.7828	28.8589	28.7253	28.9647	29.1169	28.7279	27.905	27.928	28.0933	27.9554	28.4281	28.4867	28.2133	28.612	28.5105	28.426	28.2901	27.1075	28.432	28.719	27.8187					-0.197398	0.0202732	-0.0115154	0.376231		heat shock protein 110, putative	PBANKA_1219300.1-p1	26	26	36.7	36.7	36.7	94.897	0	323.31	8863000000
NaN	NaN	NaN	NaN	NaN	26.5088	25.7845	25.9551	25.8865	25.7899	25.0807	24.7888	25.155	24.9871	25.0513	NaN	NaN	NaN	NaN	NaN	24.0766	NaN	25.0046	23.7025	24.0768	23.4865	NaN	NaN	NaN	24.5921	+	+			-2.38507	0.972377	-0.469339	1.14386	G_I2_G_WT;G_PP1_G_WT	DNA polymerase alpha subunit B, putative	PBANKA_1326900.1-p1	13	13	30.5	30.5	30.5	63.655	0	51.934	651950000
27.2624	27.2224	27.1969	26.9945	26.8829	27.8751	27.7245	27.4325	27.471	27.358	27.8157	27.6657	27.9803	27.9846	27.8559	27.2259	27.1416	27.3241	27.3065	27.734	27.9815	27.7238	27.8909	28.0237	28.08	27.774	26.9493	27.6411	28.119	27.3992					-0.748621	-0.288208	-0.230107	0.363467		M17 leucyl aminopeptidase, putative	PBANKA_1309900.1-p1	12	12	19.4	19.4	19.4	72.093	0	105.19	4313300000
26.0227	25.589	25.3116	25.7264	25.8244	26.9702	26.975	26.9122	26.6317	26.572	25.805	25.7474	25.9614	25.9381	25.7681	25.8417	26.1994	25.9828	26.5123	26.206	26.8024	26.637	27.1705	27.171	27.0053	26.5943	26.1792	26.3395	26.239	26.8635		+			-0.149187	0.968195	-0.294651	0.514124	G_PP1_G_WT	26S proteasome regulatory subunit p55, putative	PBANKA_0502200.1-p1	15	15	44.3	44.3	44.3	55.277	0	144.63	2216500000
NaN	NaN	NaN	NaN	NaN	NaN	22.2745	22.0837	22.3508	22.1293	NaN	NaN	NaN	NaN	NaN	NaN	NaN	NaN	NaN	NaN	22.3262	22.6662	23.1109	22.9817	22.8343	NaN	NaN	NaN	NaN	NaN		+			0	0.965973	0	0.744552	G_PP1_G_WT	translation initiation factor eIF-2B subunit beta, putative	PBANKA_1463500.1-p1	3	3	6.4	6.4	6.4	61.605	0	4.3277	59027000
24.3832	25.5124	25.0627	25.6056	26.2142	27.1939	26.5629	26.695	26.7553	26.6211	26.5711	26.4547	26.6453	26.4498	26.1995	24.2105	22.7538	24.3855	24.0107	24.7673	25.7841	25.85	26.1273	26.2813	26.1201	25.6653	25.2981	25.881	25.7082	25.8224	+		+		-1.10845	0.301577	-1.64943	0.357584	G_I2_G_WT;S_I2_S_WT	serine/threonine protein phosphatase 5	PBANKA_1131900.1-p1	22	22	38	38	38	82.454	0	100.43	1586000000
NaN	NaN	NaN	NaN	NaN	22.7968	23.0895	22.7479	22.5126	NaN	NaN	NaN	NaN	NaN	NaN	NaN	NaN	NaN	NaN	NaN	22.5189	22.5724	22.7814	22.7554	22.8564	NaN	NaN	NaN	NaN	22.4306					0	0.357326	-0.0573029	0.356423		ATP-dependent RNA helicase DDX23, putative	PBANKA_1233300.1-p1	4	4	4.5	4.5	4.5	108.6	0	7.3538	77357000
25.2147	26.4149	25.6316	26.462	25.8908	26.0921	26.0995	26.673	25.9232	26.1016	24.8579	25.0432	25.6246	25.8432	24.7881	24.1902	NaN	NaN	24.2388	NaN	23.2242	NaN	24.031	23.3104	22.6584	NaN	NaN	23.1541	NaN	23.5242		+			0.691383	0.946495	0.143723	0.67301	G_PP1_G_WT	radial spoke head protein, putative	PBANKA_0942300.1-p1	11	11	26.7	26.7	26.7	66.929	0	62.008	893370000
26.3813	25.9788	25.77	NaN	25.9857	26.0135	26.5787	26.3949	26.3718	26.3788	25.4355	25.5869	25.478	25.3613	25.2442	25.899	25.8554	25.4282	26.3883	25.8671	26.2153	26.2892	26.9093	26.3737	26.5512	26.0898	26.2013	25.5613	26.0216	26.4782		+			-0.196713	0.926375	-0.182841	0.397298	G_PP1_G_WT	26S proteasome regulatory subunit RPN12, putative	PBANKA_0410300.1-p1	10	10	46.5	46.5	46.5	35.62	0	75.998	1700600000
NaN	NaN	NaN	NaN	NaN	21.9602	22.1079	22.0213	22.1006	22.1971	21.3825	NaN	21.4109	NaN	21.2781	NaN	NaN	NaN	NaN	NaN	21.5822	22.9722	22.4295	22.3153	22.1882	21.566	NaN	NaN	NaN	21.4107	+				1.39806	0.479567	0.489675	0.341641	G_I2_G_WT	THO complex subunit 2, putative	PBANKA_1462700.1-p1	6	6	3.7	3.7	3.7	261.05	0	7.4184	69437000
25.3113	25.4486	25.0558	24.9226	24.9039	25.9076	25.508	25.6762	25.7824	25.6325	25.0271	25.1242	25.1122	25.3787	25.1388	25.1532	24.928	24.5728	25.9611	24.5739	25.503	25.1977	25.512	25.5705	25.4758	25.0971	24.978	25.1073	25.2726	25.0997					-0.0277267	0.545163	-0.0731232	0.340877		eukaryotic translation initiation factor 2 subunit beta, putative |	PBANKA_1209000.1-p1	7	7	28.6	28.6	28.6	25.493	0	88.58	996480000
NaN	NaN	24.1855	NaN	24.5038	24.8993	24.3683	24.4958	24.6585	24.6151	23.6582	23.7899	23.8953	23.454	23.6175	24.0845	24.4451	24.1334	24.3866	23.7784	23.9855	24.5194	24.5108	24.2771	24.3144	NaN	24.5797	NaN	24.0214	24.2845		+			-0.838446	0.924405	0.659732	0.81561	G_PP1_G_WT	AP endonuclease (DNA-[apurinic or apyrimidinic site] lyase), pu	PBANKA_0404100.1-p1	5	5	12.6	12.6	12.6	63.068	0	14.102	434630000
28.285	28.7254	28.0074	28.4739	28.6397	29.0413	29.0881	28.6428	28.9023	28.6084	28.8232	28.8874	29.4792	29.4336	29.2119	27.6372	27.6523	28.117	27.6845	28.1492	28.3308	28.4625	28.6244	28.4521	28.6189	28.292	27.2743	28.5322	28.6108	28.1023					-0.740786	-0.310471	-0.314274	0.335438		DNA/RNA-binding protein Alba 1, putative	PBANKA_1423300.1-p1	7	7	26.4	26.4	26.4	26.88	0	46.418	8727400000
NaN	26.0822	24.8384	25.0158	25.0705	26.5221	26.0919	26.5164	26.6411	26.4374	25.4353	25.7384	25.5027	25.5128	25.4162	25.796	25.7152	25.4451	24.9214	25.4245	26.2077	26.1747	26.7674	27.0142	26.8717	26.4036	26.2887	26.5268	26.324	26.2235		+			-0.794291	0.920699	-0.892899	0.253835	G_PP1_G_WT	erythrocyte membrane antigen 1	PBANKA_1000600.1-p1	7	7	33.5	33.5	33.5	35.834	0	261.76	1585800000
NaN	24.655	24.2729	NaN	24.4118	24.3391	24.4088	24.4694	24.7026	24.496	24.0102	23.8867	24.3962	23.5758	23.5615	24.6592	24.3423	24.4139	23.68	24.3108	23.821	24.1622	24.2262	23.5201	23.89	23.7291	23.2915	23.5746	23.3516	24.0412					0.0232925	0.5971	0.683639	0.326316		replication protein A1, large subunit, putative	PBANKA_1007200.1-p1	14	14	14.4	14.4	14.4	135.59	0	67.74	439430000
26.3172	27.6196	26.1896	26.906	26.9586	28.3338	27.2464	27.7665	27.8184	27.7405	26.7669	26.6808	27.0108	27.1273	26.7493	25.9521	25.3617	25.4934	25.3833	25.6419	26.5886	26.6406	26.9914	26.9432	26.9631	25.7315	25.8756	25.952	26.1028	26.1182		+			-0.0688244	0.914095	-0.389558	0.869366	G_PP1_G_WT	FACT complex subunit SSRP1, putative	PBANKA_1305300.1-p1	17	17	39.8	39.8	39.8	57.128	0	323.31	3095500000
NaN	NaN	NaN	NaN	NaN	26.1211	25.6725	25.8007	25.923	25.9196	24.8356	24.4828	25.1702	25.2568	25.1316	NaN	NaN	NaN	NaN	NaN	24.8728	25.1529	25.475	25.3786	25.556	24.2907	23.8288	24.6973	24.5617	24.4588	+	+	+		-2.32076	0.911984	-2.38442	0.919601	G_I2_G_WT;G_PP1_G_WT;S_I2_S_WT	non-SERCA-type Ca2+ -transporting P-ATPase, putative	PBANKA_0610400.1-p1	18	18	20.4	20.4	20.4	167.95	0	151.31	765100000
25.0178	25.0649	24.8577	24.7521	25.2071	26.2512	25.7075	26.028	25.9578	25.7763	25.837	25.8234	26.209	26.3148	25.7728	25.1613	24.1434	25.1538	24.8756	25.6498	25.0959	24.9578	25.1855	25.7715	25.4872	25.0906	23.9919	25.3565	25.5492	24.9096	+				-1.01147	-0.0472416	0.0172272	0.320022	G_I2_G_WT	threonine--tRNA ligase, putative	PBANKA_0922300.1-p1	21	21	28.7	28.7	28.7	103.66	0	32.373	1090900000
NaN	NaN	25.1065	NaN	25.5137	25.5143	25.1548	25.0614	25.5305	25.7632	25.3219	25.7655	25.8152	25.9106	25.387	25.0745	NaN	25.5013	NaN	25.1724	25.5603	25.9372	25.7585	24.8187	25.2367	25.1674	24.9398	25.1452	25.5917	24.879	+				-1.5545	-0.235184	-0.959563	0.317645	G_I2_G_WT	polyadenylate-binding protein-interacting protein 1, putative	PBANKA_0939600.1-p1	15	15	7.3	7.3	7.3	368.52	0	41.609	887280000
27.1424	27.1417	27.0042	27.1425	27.5234	28.4806	28.0431	28.4831	28.3682	28.3417	27.3699	27.3282	27.4609	27.5107	27.5082	25.407	25.1918	25.3892	25.4055	25.3373	25.7968	25.0736	25.8672	25.3424	25.0234	23.5558	23.9547	24.7141	25.4251	25.6508		+			-0.244745	0.907775	0.68606	0.760577	G_PP1_G_WT	inner membrane complex sub-compartment protein 1	PBANKA_1209400.1-p1	8	8	51.7	51.7	51.7	16.418	0	256.6	3578800000
NaN	NaN	NaN	24.2682	23.8676	25.1001	24.6956	25.0194	25.107	24.8272	24.0086	23.9317	23.6404	24.3141	24.345	24.0398	23.8246	24.3953	24.2868	24.1745	24.9204	24.8331	25.2037	25.38	25.0437	24.4395	NaN	24.3158	24.8443	24.5892		+			-0.845518	0.901888	-0.0612587	0.87074	G_PP1_G_WT	ATP-dependent RNA helicase DBP5, putative	PBANKA_1322700.1-p1	7	7	13.7	13.7	13.7	77.265	0	37.764	553290000
NaN	25.8921	NaN	25.3893	25.6713	26.4073	25.8724	26.1771	26.3129	26.088	25.1288	25.1409	25.2823	25.4512	25.3603	25.3508	24.8486	24.7016	24.8987	25.1099	25.2107	25.6418	25.8184	25.6603	25.7573	24.7672	24.6308	24.9486	25.1462	25.4673		+			-0.944419	0.898809	-0.0101078	0.625663	G_PP1_G_WT	eukaryotic translation initiation factor 3 subunit F, putative	PBANKA_0819300.1-p1	9	9	35.5	35.5	35.5	36.056	0	34.57	1159200000
NaN	24.7841	24.8594	25.134	25.5696	24.7376	24.4977	24.2201	24.2144	24.1085	24.5674	24.5539	24.7157	24.8046	24.6546	24.3293	23.747	24.2016	NaN	24.1218	23.1382	NaN	NaN	NaN	NaN	NaN	NaN	NaN	NaN	NaN			+		-0.113043	-0.30359	1.60108	0.308373	S_I2_S_WT	dynein light chain 1	PBANKA_0708100.1-p1	7	7	37.4	37.4	37.4	22.887	0	23.045	364700000
NaN	NaN	NaN	NaN	NaN	24.6119	24.6256	24.6227	24.8921	24.8578	24.5246	24.3625	24.3226	24.7271	NaN	NaN	NaN	24.7133	NaN	25.117	24.4656	24.6177	24.5083	24.3516	24.4037	NaN	24.1297	NaN	24.4903	24.1493		+			-0.940812	0.89867	-0.0554802	1.0588	G_PP1_G_WT	ras-related protein Rab-5C, putative	PBANKA_0206500.1-p1	7	6	38.8	38.8	33.6	24.065	0	12.992	441840000
NaN	NaN	NaN	NaN	NaN	24.2834	24.7601	24.4881	24.2483	24.5406	23.6065	23.5447	23.6175	23.5009	23.5831	NaN	NaN	NaN	NaN	NaN	23.8844	24.276	24.2297	24.117	24.1074	NaN	23.9022	23.8657	23.8877	24.0547	+	+			-0.920583	0.893533	-1.02035	0.501363	G_I2_G_WT;G_PP1_G_WT	nuclear import protein MOG1, putative	PBANKA_1359100.1-p1	4	4	30.5	30.5	30.5	19.806	0	58.768	303320000
27.2962	27.2235	27.0199	26.875	27.1625	28.1889	28.4289	28.3376	28.1145	28.2186	27.372	27.434	27.4091	27.3764	27.2523	27.1641	27.2819	27.3289	27.5833	27.4532	27.8979	28.0266	28.2809	28.2155	28.2826	27.4256	27.2123	27.3547	27.3502	27.5523		+			-0.253331	0.888922	-0.0167309	0.761699	G_PP1_G_WT	26S proteasome regulatory subunit RPN2, putative	PBANKA_1329700.1-p1	40	40	38.8	38.8	38.8	138.09	0	323.31	5503500000
29.3829	29.2956	29.1829	29.3897	29.3265	30.3083	30.0024	29.9864	29.9933	29.9203	29.941	29.8658	30.2264	30.3308	29.8808	26.4946	26.5189	26.7456	26.5945	27.1372	27.2955	26.7461	27.6454	26.8848	26.7222	26.5875	25.854	27.1108	27.3708	26.9354					-0.733455	-0.00681915	-0.0735409	0.287124		microgamete surface protein MiGS, putative	PBANKA_1449000.1-p1	18	18	39.2	39.2	39.2	65.381	0	323.31	12377000000
26.4467	26.6691	26.4959	26.6172	26.5823	27.0515	27.1242	27.0959	26.8865	26.9891	26.0413	26.057	26.3169	26.1993	26.0891	26.7718	27.1022	27.0071	26.6244	26.7992	26.8722	26.9152	27.3246	27.0262	27.0357	26.2503	26.1507	26.4521	26.3083	26.6671		+			0.421499	0.888685	0.495231	0.66909	G_PP1_G_WT	26S proteasome regulatory subunit RPN6, putative	PBANKA_1039600.1-p1	21	21	37.8	37.8	37.8	73.145	0	243.46	2632900000
26.576	26.7446	26.4351	26.2992	27.1208	25.7716	25.3978	25.8448	25.957	26.2461	25.7866	25.9579	25.9416	26.0559	26.6154	27.5004	26.9055	27.2511	26.7484	27.1921	25.652	24.281	25.5207	25.2669	24.9055	NaN	25.4126	24.7725	25.3562	26.9151			+		0.563657	-0.228028	2.27785	0.283581	S_I2_S_WT	1-cys-glutaredoxin-like protein-1, putative	PBANKA_0403100.1-p1	5	5	29.2	29.2	29.2	19.421	0	51.867	1906600000
24.2276	24.0383	24.2947	24.2597	24.0577	24.5028	24.7822	24.5551	24.4944	24.6095	23.685	23.7714	23.7867	23.6354	23.6288	NaN	22.3843	NaN	22.686	NaN	NaN	NaN	22.3942	NaN	NaN	NaN	NaN	NaN	NaN	NaN		+			0.474126	0.887358	-0.0720818	-0.412603	G_PP1_G_WT	dynein light chain, putative	PBANKA_0302200.1-p1	3	3	44.9	44.9	44.9	12.278	0	223.37	264430000
28.988	29.1221	28.6934	28.7223	28.9468	29.3938	29.2182	29.3896	29.24	29.2494	28.8724	28.8355	28.9041	28.7723	28.6361	27.3875	27.3589	27.3242	27.37	27.3249	27.6125	27.5891	28.1239	27.8384	27.7473	27.3626	27.2114	27.4567	27.4088	28.0762					0.0904621	0.494144	-0.150033	0.279074		DNA replication licensing factor MCM4, putative	PBANKA_1415600.1-p1	33	33	43	43	43	107.5	0	323.31	8688300000
25.963	25.5858	25.2825	NaN	24.8953	25.8629	25.6586	25.5128	25.6445	25.6755	25.4503	25.529	25.943	25.3902	25.2967	24.5862	NaN	24.209	NaN	24.3721	25.1222	25.0334	25.3992	25.5804	25.4667	24.9346	24.3412	25.2405	25.6866	25.013					-0.888418	0.149017	-1.57817	0.277203		transportin, putative	PBANKA_1126400.1-p1	18	18	18.6	18.6	18.6	133.96	0	202.79	965070000
NaN	NaN	NaN	NaN	NaN	22.9437	23.0016	23.308	22.6063	23.5203	NaN	22.7321	22.7915	22.0787	NaN	NaN	NaN	NaN	NaN	NaN	22.6002	23.3483	23.5914	23.4634	23.7553	22.4038	22.9656	22.5302	22.8235	22.8288		+			0.941938	0.882482	-0.479241	0.641317	G_PP1_G_WT	signal recognition particle subunit SRP72, putative	PBANKA_0912200.1-p1	5	5	7.1	7.1	7.1	95.86	0	43.315	133560000
25.6199	25.5408	24.868	24.7369	25.3334	26.5859	25.9342	26.0363	26.0454	25.9139	25.4635	25.675	25.572	25.6975	25.3985	25.1947	24.0426	24.504	24.7384	24.5465	24.9701	25.0561	25.0063	25.4719	25.1686	24.5865	24.9104	24.6736	25.0152	25.1055					-0.341513	0.541848	-0.253028	0.276365		DNA primase small subunit, putative	PBANKA_1302600.1-p1	12	12	32	32	32	52.898	0	49.41	1061400000
NaN	NaN	NaN	NaN	NaN	NaN	NaN	NaN	NaN	NaN	NaN	21.5357	NaN	21.3265	NaN	24.0548	24.458	23.5175	23.3825	24.5717	22.0893	22.4815	23.0965	22.9371	23.3171	23.0815	NaN	NaN	23.2966	22.6665			+		0.263396	-0.0914528	1.48346	0.270855	S_I2_S_WT	fam-a protein	PBANKA_0317141.1-p1;PBANKA_0200600.1-p1	4	1	26.2	22	11	32.684	0	41.004	116010000
27.0341	27.0886	26.9614	26.6745	27.153	27.539	27.3129	27.3506	27.3219	27.1561	26.9925	26.9274	26.8876	26.7797	26.6497	27.7229	27.8285	27.6422	27.807	27.739	27.9317	27.736	28.1814	28.1387	28.104	27.6335	27.6193	27.661	27.7259	28.0997					0.134945	0.488741	6.29425e-05	0.270498		proline--tRNA ligase	PBANKA_1429600.1-p1	27	27	38.8	38.8	38.8	88.154	0	323.31	4222800000
26.1369	26.1476	25.6011	26.14	25.9131	26.9679	26.8868	27.0318	26.5691	26.51	25.982	25.9678	25.9321	26.0043	25.6895	25.9904	25.7313	26.2063	25.7877	25.5969	26.5764	27.049	27.3096	26.7318	27.3374	26.429	26.5902	26.6603	26.5862	26.8		+			0.0726021	0.87798	-0.750618	0.387716	G_PP1_G_WT	tryptophan-rich protein	PBANKA_0623300.1-p1	13	13	32.7	32.7	32.7	41.911	0	61.383	2155200000
NaN	NaN	NaN	NaN	NaN	23.1022	23.418	22.9878	23.0367	23.2117	NaN	NaN	NaN	NaN	23.3091	NaN	NaN	NaN	NaN	NaN	23.0716	NaN	23.5342	23.1923	23.0269	NaN	NaN	NaN	NaN	NaN		+			0.375746	0.874694	0	1.07142	G_PP1_G_WT	NLI interacting factor-like phosphatase	PBANKA_1211100.1-p1	2	2	2.5	2.5	2.5	148.74	0	5.0515	1201100000
26.4549	26.3202	26.542	26.4007	26.3047	26.8624	26.7991	26.6399	26.846	26.2291	27.2237	27.0371	27.4079	27.4261	27.257	26.0112	26.025	26.2284	26.0948	26.1998	26.4178	25.9102	26.3097	26.2925	26.2381	26.1153	24.3147	26.487	26.7908	26.1789	+				-0.865845	-0.595061	0.134488	0.256309	G_I2_G_WT	Hsc70-interacting protein	PBANKA_1242300.1-p1	9	9	22.2	22.2	22.2	47.687	0	71.962	2130200000
NaN	NaN	NaN	24.5242	25.0321	26.1372	24.901	25.1316	24.9917	25.0211	24.506	24.4155	24.4278	24.6956	23.7648	26.01	25.1447	25.4876	25.3659	25.8976	23.6228	25.0389	24.9472	24.6212	24.5925	23.5641	NaN	NaN	NaN	24.2495		+	+	+	-1.02016	0.874583	2.82805	1.81141	G_PP1_G_WT;S_I2_S_WT;S_PP1_S_WT	SNF2 helicase, putative	PBANKA_1123500.1-p1	18	18	8.6	8.6	8.6	292.62	0	36.011	729840000
24.5174	NaN	NaN	NaN	25.5335	25.7745	25.7988	25.3701	25.5483	25.7719	24.6543	24.5385	24.7135	25.063	24.9364	24.7423	NaN	NaN	NaN	NaN	24.6989	23.6984	24.6114	24.5996	24.552	NaN	23.7208	NaN	24.6661	24.5676	+	+			-1.18152	0.871611	-0.63816	0.961642	G_I2_G_WT;G_PP1_G_WT	conserved Plasmodium protein, unknown function	PBANKA_0706400.1-p1	18	18	20.7	20.7	20.7	131.92	0	65.16	656420000
25.1897	25.1195	24.842	NaN	24.8345	24.959	24.8443	24.8955	24.8369	24.5799	24.415	24.4749	24.5047	24.3161	24.1914	25.0408	25.0695	24.883	24.857	24.6277	24.6422	24.9707	25.0206	24.8787	24.8495	24.2469	24.7125	24.6024	24.7098	24.8444					0.105039	0.442711	0.272424	0.249148		ubiquitin carboxyl-terminal hydrolase 2, putative	PBANKA_1231500.1-p1	16	16	16.2	16.2	16.2	142.4	0	28.609	677160000
25.1215	25.112	24.8601	24.4447	24.7989	25.5963	25.6115	25.3141	25.365	25.369	24.5991	24.6923	24.6767	24.4066	24.5318	24.3418	24.6603	24.3181	24.2031	24.1864	24.939	24.7286	25.5355	25.1031	25.1984	24.7578	24.4417	24.6182	24.7164	25.0069		+			0.286133	0.869894	-0.366267	0.392732	G_PP1_G_WT	nuclear protein localization protein 4, putative	PBANKA_1107300.1-p1	9	9	20.9	20.9	20.9	60.477	0	30.701	754610000
NaN	NaN	NaN	NaN	NaN	22.8913	22.5345	23.06	NaN	22.7765	NaN	NaN	NaN	NaN	NaN	NaN	NaN	NaN	NaN	NaN	23.2186	23.5844	24.5221	24.0757	23.7282	NaN	NaN	22.3266	22.2753	NaN		+		+	0	0.869265	0.0394051	1.36996	G_PP1_G_WT;S_PP1_S_WT	intron-binding protein aquarius, putative	PBANKA_1365300.1-p1	13	13	7.2	7.2	7.2	269.13	0	44.936	117340000
26.7411	26.8145	26.2489	26.6451	26.9069	27.6987	27.7076	27.667	27.6282	27.6716	26.6952	26.5116	27.1733	26.8546	26.8093	26.5627	26.2033	26.7102	26.3729	26.6043	27.0305	27.3123	27.5729	27.5349	27.6682	26.2927	26.0439	26.3631	26.4342	26.508		+		+	-0.137532	0.865805	0.162321	1.09541	G_PP1_G_WT;S_PP1_S_WT	small GTP-binding protein sar1, putative	PBANKA_0718800.1-p1	8	7	56	56	51.8	21.915	0	323.31	3369600000
24.4093	24.4287	23.8608	23.9765	23.8378	24.8654	24.7526	24.5104	24.4413	24.4787	24.1948	24.4352	24.4829	24.853	24.3248	25.6042	24.9144	25.2589	25.3028	25.3001	25.1102	24.4449	25.3608	25.0714	24.8295	24.2718	24.3082	24.7332	24.8879	25.4181					-0.355531	0.151542	0.552234	0.239499		lipoamide acyltransferase compo	PBANKA_0402300.1-p1	14	14	42.4	42.4	42.4	50.111	0	51.629	607180000
NaN	NaN	NaN	NaN	NaN	25.1688	24.961	24.8954	24.9691	25.2122	24.5081	24.8789	24.9958	24.9854	24.8897	NaN	NaN	NaN	NaN	NaN	NaN	NaN	NaN	24.4481	NaN	NaN	NaN	NaN	NaN	24.981	+				-1.7716	0.189724	-0.107311	0.23868	G_I2_G_WT	2-oxoglutarate dehydrogenase E1 component, putative	PBANKA_0710100.1-p1	11	11	13.6	13.6	13.6	120.55	0	23.388	374130000
25.1415	25.707	24.3122	25.5551	25.2608	25.8517	25.6364	25.7538	25.7988	25.7418	24.7126	24.7647	25.3853	24.678	24.9401	25.0943	24.932	24.8971	24.6656	25.1786	24.3893	25.0002	25.3471	25.5441	25.3325	NaN	24.987	24.7509	24.6701	25.5884		+			0.299186	0.860359	0.500957	0.670087	G_PP1_G_WT	conserved Plasmodium protein, unknown function	PBANKA_0416400.1-p1	9	9	37	37	37	32.471	0	86.405	896390000
NaN	NaN	NaN	NaN	NaN	25.4207	25.1281	24.8925	25.1752	25.239	24.0728	24.2326	24.4959	24.4335	24.3233	NaN	NaN	NaN	NaN	NaN	23.8075	NaN	NaN	NaN	NaN	NaN	NaN	NaN	NaN	NaN	+	+			-2.10929	0.859485	0	0.582238	G_I2_G_WT;G_PP1_G_WT	tryptophan--tRNA ligase, putative	PBANKA_1350700.1-p1	7	7	15.7	15.7	15.7	76.58	0	13.684	427220000
25.0416	24.8655	24.3403	24.8953	24.9376	26.3465	26.4366	26.4967	26.3854	26.3517	25.7314	24.9532	25.8602	26.1052	25.0751	NaN	NaN	22.4307	NaN	24.1341	24.8036	24.2273	24.8694	24.0644	24.1624	23.351	NaN	NaN	NaN	23.532		+		+	-0.728941	0.858363	-0.224717	1.64784	G_PP1_G_WT;S_PP1_S_WT	subtilisin-like protease 1	PBANKA_1107100.1-p1	11	11	26	26	26	67.313	0	146.72	858210000
26.4144	27.1745	26.8623	26.4116	26.7732	24.8364	26.0292	25.8264	25.4985	25.9888	26.3523	26.7248	26.2077	25.7692	26.2988	27.3586	27.1091	27.231	26.991	26.9958	26.4261	25.0195	26.0417	25.8725	26.0522	26.0111	26.3492	NaN	26.0771	27.2635					0.456633	-0.634694	1.48182	0.22714		histidine triad protein, putative	PBANKA_0611900.1-p1	8	8	28.1	28.1	28.1	23.424	0	29.049	1842900000
26.6024	26.4757	25.9825	26.3387	26.3653	26.7384	26.5973	26.8173	26.8389	26.8053	26.404	26.4748	26.7165	26.6333	26.4429	25.6444	25.2873	25.1608	25.7112	25.7122	25.2197	25.5994	26.122	25.7723	25.4615	25.5343	24.5989	25.543	25.6371	25.7274					-0.18136	0.225142	0.0950401	0.226839		phosphoenolpyruvate carboxylase	PBANKA_1017900.1-p1	25	25	26.6	26.6	26.6	130.16	0	74.74	1657600000
26.7857	26.9601	26.6328	26.8164	27.0296	27.8034	27.6657	27.9237	27.8476	27.8088	26.9134	26.8461	27.0293	26.9164	27.0708	27.4017	27.1806	27.4891	27.149	27.8488	27.507	27.9125	28.0187	27.9	28.1214	27.2955	26.8606	27.1592	27.3355	26.9861		+			-0.110272	0.854605	0.286455	0.764516	G_PP1_G_WT	parasitophorous vacuolar protein 1	PBANKA_0919100.1-p1	15	15	60.3	60.3	60.3	44.696	0	205.36	4294300000
25.7617	25.2847	25.3597	25.6794	25.4036	26.243	26.6188	26.5501	26.4775	26.4493	25.7718	25.6396	25.6132	25.6162	25.4612	25.8378	26.0307	25.9698	25.9066	25.9641	26.5335	26.451	26.8355	26.5693	26.4295	25.9314	25.8109	25.9194	25.5934	26.1275		+			-0.122574	0.847344	0.0652504	0.687214	G_PP1_G_WT	26S proteasome regulatory subunit RPN8, putative	PBANKA_0813900.1-p1	11	11	40.8	40.8	40.8	36.839	0	80.49	1666200000
NaN	25.0453	NaN	NaN	24.4976	25.3223	25.3315	24.9716	25.1837	25.2572	24.7793	23.8435	24.6775	24.262	24.2991	NaN	NaN	23.1632	NaN	23.1989	23.6595	23.8307	24.6723	24.1131	23.7777	NaN	NaN	NaN	24.0914	24.3551		+			-1.15864	0.84102	-0.825378	0.418274	G_PP1_G_WT	conserved Plasmodium protein, unknown function	PBANKA_1204900.1-p1	9	9	34.1	34.1	34.1	33.886	0	38.03	488150000
NaN	NaN	NaN	NaN	NaN	NaN	NaN	NaN	NaN	NaN	NaN	NaN	NaN	NaN	NaN	NaN	NaN	NaN	NaN	NaN	23.1752	23.4333	23.1458	23.0582	22.9141	22.9025	NaN	23.1767	23.3072	22.9881					0	0	-0.311475	0.218862		fam-b protein	PBANKA_0500600.1-p1;PBANKA_1000041.1-p1;PBANKA_0316921.1-p1	3	3	13.7	13.7	13.7	28.891	0	14.066	59680000
26.7584	26.6971	26.0636	26.5733	26.7462	27.8552	27.6142	27.695	27.7352	27.7403	26.7959	26.8649	27.0765	27.0485	26.6745	25.8928	25.5781	25.789	26.1223	25.7955	26.5035	26.5961	26.9348	26.8599	26.8563	26.4767	25.9835	26.5036	26.2564	26.5157		+			-0.324339	0.835934	-0.511657	0.402939	G_PP1_G_WT	conserved Plasmodium protein, unknown function	PBANKA_1321000.1-p1	19	19	39.6	39.6	39.6	70.786	0	323.31	2957100000
25.9384	25.6744	25.9178	25.644	26.6882	26.6115	26.2066	26.4859	26.3745	26.2101	26.5828	26.7928	26.7182	26.6902	26.9737	26.561	26.1803	26.4782	26.5068	26.7405	25.9125	24.9667	25.9082	25.8204	25.2928	25.2219	23.5078	25.6832	26.0112	26.3961					-0.778932	-0.373804	1.1293	0.216066		methionine--tRNA ligase, putative	PBANKA_0518700.1-p1	16	16	22.6	22.6	22.6	104.7	0	82.252	1684000000
28.2626	28.3412	27.6669	28.3098	28.3342	29.1445	29.0323	29.0272	28.9632	28.9089	28.1675	28.27	28.2406	28.3561	27.8646	28.3138	28.2176	28.1785	29.0336	28.2892	28.5998	27.8509	28.9697	28.3393	27.9329	28.7283	28.7246	28.7238	28.7486	28.9137		+			0.00316391	0.835447	-0.361246	-0.429267	G_PP1_G_WT	protein disulfide isomerase related protein, putative	PBANKA_0914300.1-p1	28	28	64.5	64.5	64.5	49.213	0	271.84	8837900000
25.5963	25.3569	25.6961	25.0687	25.4345	25.8739	25.6442	25.7201	25.8638	25.8224	25.6438	25.9425	25.8543	25.8013	25.751	25.4509	25.2722	25.5335	25.4245	25.7083	25.3696	24.8248	25.5392	25.648	25.5705	25.237	24.4534	25.0864	25.4287	25.6715					-0.368085	-0.0137028	0.3025	0.215037		26S proteasome regulatory subunit RPN13, putative	PBANKA_1028700.1-p1	5	5	23.4	23.4	23.4	29.569	0	33.38	1107400000
24.9878	25.5775	25.2049	23.3897	25.7867	27.6029	26.6553	27.1569	26.9644	26.5992	26.6625	26.2794	26.4455	25.5153	25.9082	27.8579	27.6801	28.0653	27.741	28.575	28.6014	28.3696	28.6501	28.78	28.9609	28.2908	27.6891	28.3839	28.7673	27.9432	+	+			-1.17285	0.833578	-0.231001	0.457543	G_I2_G_WT;G_PP1_G_WT	serine repeat antigen 1	PBANKA_0305100.1-p1	38	36	44	44	42.7	154.92	0	323.31	4623000000
26.0434	26.6252	26.1773	26.5584	26.2949	27.5957	27.164	27.5816	27.6961	27.6925	26.8235	26.7301	26.8508	26.7252	26.4482	26.694	26.5966	26.6034	27.0979	26.4825	27.4267	28.3472	28.3402	28.1669	28.3406	26.7471	26.2016	26.9585	26.9292	26.852		+		+	-0.375732	0.830419	-0.0427849	1.38662	G_PP1_G_WT;S_PP1_S_WT	40S ribosomal protein S11, putative	PBANKA_1231000.1-p1	8	7	67.5	67.5	67.5	16.074	0	147.69	3733400000
24.9591	25.3661	25.2971	25.3496	25.1667	24.5905	24.4986	24.5299	24.8286	24.6223	25.1883	25.164	25.1689	25.009	25.0498	25.5165	26.0544	25.7838	25.3458	25.8838	25.1646	25.0624	24.7925	24.9792	24.9477	24.0073	23.9927	25.145	25.2936	25.4635					0.111699	-0.50202	0.936434	0.208825		ras-related protein Rab-18, putative	PBANKA_1223300.1-p1	6	6	31.8	31.8	31.8	23.126	0	9.7898	802010000
25.4793	25.0956	25.1451	24.7241	25.8901	27.2193	27.2864	27.6223	27.7668	27.6394	26.723	26.4207	26.8157	26.8103	26.6241	25.0507	25.2624	24.7963	26.3632	25.2543	27.304	28.716	28.7311	28.5881	28.7448	26.9738	26.0981	26.9982	27.2447	26.8032	+	+	+	+	-1.4119	0.828102	-1.47821	1.59319	G_I2_G_WT;G_PP1_G_WT;S_I2_S_WT;S_PP1_S_WT	40S ribosomal protein S9, putative	PBANKA_1234800.1-p1	10	10	41.8	41.8	41.8	22.146	0	37.806	3753900000
25.4293	26.002	25.3614	25.877	25.7802	26.1964	25.9138	26.1008	25.8419	25.8545	25.4951	25.8904	25.7633	25.5949	25.6571	25.7243	25.5759	25.3843	25.4625	25.726	25.6665	25.1892	25.8606	25.432	24.8761	25.1508	24.7379	25.1182	25.1878	25.7883					0.00982971	0.301349	0.378009	0.208288		V-type proton ATPase subunit C, putative	PBANKA_0207200.1-p1	11	11	30	30	30	45.272	0	52.471	1156500000
NaN	NaN	NaN	NaN	22.7569	23.2515	22.8644	23.0829	23.1661	22.9925	NaN	22.7998	22.8294	22.8664	22.7649	NaN	22.9082	23.1256	23.3909	23.4335	23.0557	NaN	23.1155	23.606	23.2884	NaN	22.9353	NaN	23.3422	23.6227					0.12916	0.546236	0.167247	0.20606		guanine nucleotide-exchange factor SEC12, putative	PBANKA_0931600.1-p1	3	3	8.7	8.7	8.7	48.884	0	7.4209	164710000
24.9651	24.8523	24.5039	25.1361	25.0592	25.9027	25.0974	25.5004	25.61	25.4992	25.1868	25.4606	25.2921	25.8552	25.7099	22.8612	22.7902	22.8836	23.4224	22.9752	NaN	23.0845	24.1773	24.1189	23.7757	22.8074	23.1428	23.5331	23.6457	23.6991					-0.597622	0.0209808	-0.379104	0.205822		long chain polyunsaturated fatty acid elongation enzyme, putative |	PBANKA_0104700.1-p1	3	3	13.5	13.5	13.5	34.508	0	31.213	664740000
23.6377	23.9992	23.151	NaN	24.5663	23.754	NaN	23.4844	23.7574	23.4334	23.4699	23.8342	24.0552	23.5452	24.4225	NaN	NaN	24.641	24.4678	24.8143	23.756	NaN	24.0528	24.0367	23.8204	23.6056	NaN	23.6399	24.0474	24.3873					-0.200888	-0.597215	0.0631908	0.205599		peptidyl-prolyl cis-trans isomerase, putative	PBANKA_1225800.1-p1	3	3	14.3	14.3	14.3	23.899	0	5.2371	320100000
NaN	NaN	NaN	NaN	NaN	23.7017	22.8411	23.623	24.0309	23.9232	23.3978	NaN	23.5536	23.0755	NaN	NaN	NaN	NaN	NaN	NaN	NaN	23.9044	23.8095	24.627	24.2276	NaN	NaN	NaN	23.5971	NaN		+			0.231553	0.823423	0.170519	1.24079	G_PP1_G_WT	signal peptidase complex subunit SPC2, putative	PBANKA_1217800.1-p1	4	4	24.6	24.6	24.6	21.883	0	15.262	184150000
NaN	NaN	NaN	NaN	NaN	23.8699	24.3158	24.1685	24.2482	24.0951	23.5281	23.4336	23.3458	23.5904	NaN	NaN	NaN	NaN	NaN	NaN	NaN	NaN	NaN	NaN	NaN	NaN	NaN	NaN	NaN	NaN		+			-0.18842	0.816	0	0	G_PP1_G_WT	dynein light chain Tctex-type, putative	PBANKA_0933600.1-p1	2	2	12.6	12.6	12.6	24.033	0	8.9487	151470000
27.8979	27.8391	27.5482	27.1792	27.9383	27.7207	27.6048	27.7119	27.7116	27.8203	27.9641	27.971	28.0074	27.7192	27.7683	27.2283	27.1048	27.2353	27.5335	27.4514	27.1365	26.7831	27.4275	27.3721	27.3148	26.8368	26.2486	27.0976	27.3245	27.5361					-0.205465	-0.172148	0.301943	0.198096		glutamate--tRNA ligase, putative	PBANKA_1362000.1-p1	24	24	35	35	35	94.132	0	199.78	4322000000
24.6956	24.6137	23.9354	24.9504	24.473	25.6012	25.4204	25.1707	25.3511	25.3418	25.8036	25.6623	25.9096	26.1861	26.1312	25.4228	25.2877	24.9218	26.8065	25.4946	25.5893	25.287	26.3449	25.8291	25.5702	25.6604	24.7834	25.8714	26.555	24.7803	+				-1.40493	-0.561526	0.0565685	0.194024	G_I2_G_WT	conserved Plasmodium protein, unknown function	PBANKA_1116800.1-p1	13	13	23.9	23.9	23.9	53.339	0	41.052	1072300000
29.0093	29.1803	28.7901	28.8364	28.8296	29.7022	29.5704	29.5745	29.4936	29.4782	28.7305	28.7666	28.9264	28.7525	28.5904	27.2243	27.1492	27.3185	27.4253	27.3841	27.7374	27.9039	28.2542	27.9951	27.8481	26.9589	26.3922	27.0375	27.132	27.676		+			0.175851	0.810495	0.26095	0.908408	G_PP1_G_WT	DNA replication licensing factor MCM2, putative	PBANKA_1024900.1-p1	34	34	46	46	46	111.36	0	323.31	9668200000
28.0319	28.8302	27.4171	28.2652	28.3238	29.4492	29.1692	29.1194	29.1509	28.9936	28.7096	28.7233	29.1526	29.2339	28.7602	26.723	26.3176	26.9116	26.9911	27.4861	27.87	27.5427	28.1664	27.7212	27.832	27.8589	26.4185	28.2292	28.5513	27.1285					-0.742303	0.260523	-0.7514	0.189164		DNA/RNA-binding protein Alba 4, putative	PBANKA_1360300.1-p1	13	13	35	35	35	42.165	0	323.31	8042000000
26.8423	27.0925	26.2785	26.5466	26.6165	26.1576	25.8794	25.3612	25.7181	25.5146	25.8663	25.2669	25.7534	26.008	25.4085	26.5672	26.3423	25.9982	26.2803	26.6579	25.8261	25.7774	25.5256	25.1905	24.549	25.5787	24.9072	24.7771	25.3409	25.3223	+				1.0147	0.0655975	1.18396	0.188494	G_I2_G_WT	40S ribosomal protein S12, putative	PBANKA_0405400.1-p1	6	6	45.8	45.8	45.8	15.462	0	67.422	1419400000
NaN	NaN	NaN	NaN	NaN	22.8561	23.0338	22.3151	22.4318	22.6651	22.8855	22.8725	23.0426	24.7879	22.7756	NaN	NaN	NaN	NaN	NaN	NaN	NaN	NaN	22.6094	NaN	22.0208	NaN	NaN	NaN	22.0378					-0.624195	-0.612441	-0.039257	0.186106		histone chaperone ASF1, putative	PBANKA_1439400.1-p1	4	4	20.5	20.5	20.5	31.315	0	4.787	88148000
25.166	24.9453	24.0927	24.832	25.2148	25.0335	25.2158	24.961	25.0083	25.181	24.1497	24.3139	24.2708	24.3452	24.2797	23.9322	23.2199	24.0732	24.1058	23.6197	23.9452	23.8486	23.9806	24.1464	23.9516	23.6536	NaN	23.579	23.792	23.7694		+			0.578304	0.808067	0.464397	0.648696	G_PP1_G_WT	MKT1 domain-containing protein, putative	PBANKA_1202100.1-p1	15	15	16.5	16.5	16.5	133.32	0	56.537	574220000
26.4811	26.7681	26.3457	26.1018	27.0501	27.2569	27.0266	26.9673	27.1885	26.8595	26.3671	26.2211	26.3861	26.2513	26.0364	21.4994	23.2162	24.4174	24.8975	23.1391	24.9753	25.3817	25.4284	25.4973	25.4161	24.7076	24.748	24.7032	24.4078	25.5411		+			0.296946	0.807339	-1.38761	0.518191	G_PP1_G_WT	protein phosphatase PPM11, putative	PBANKA_0607400.1-p1	24	24	22.2	22.2	22.2	162.05	0	310.17	1693200000
NaN	NaN	NaN	NaN	23.1141	22.0928	22.3095	22.5471	21.8886	22.7642	22.7949	22.5543	23.016	22.6072	22.7108	23.9737	23.0028	23.4631	23.6054	23.955	23.2135	23.1173	23.3986	22.9862	22.9495	22.5786	23.0085	23.0952	22.6801	23.4252					-0.244025	-0.416212	0.642453	0.175452		conserved Plasmodium protein, unknown function	PBANKA_0103300.1-p1	9	9	7	7	7	235.1	0	45.7	169550000
32.2078	32.2507	31.9702	31.8944	32.2005	32.8736	32.7523	32.7736	32.6881	32.6263	32.3452	32.4555	32.4174	32.6396	32.4847	30.5122	30.4897	30.8345	30.4446	30.7913	30.6825	30.3708	31.2781	30.7953	30.6525	30.6051	30.1393	30.4937	30.6051	31.0604					-0.363762	0.274277	0.0337357	0.175091		alpha tubulin 2	PBANKA_0522700.1-p1	25	6	58	58	18.9	49.719	0	323.31	96996000000
27.1954	26.7421	26.1281	26.6757	26.9002	25.2673	25.0424	25.5005	25.4858	25.4202	24.9875	24.8606	25.2503	25.0725	25.1024	27.5469	27.3644	27.0832	26.9369	26.6862	26.6808	26.7965	26.8321	26.751	26.6966	26.5035	26.4183	26.4512	26.6806	26.8301	+				1.67368	0.288568	0.546764	0.174652	G_I2_G_WT	exported protein 2	PBANKA_1334300.1-p1	12	12	33.5	33.5	33.5	31.522	0	33.028	2171600000
25.176	24.9647	24.8832	NaN	24.5998	24.6258	25.325	25.1684	24.9325	24.7596	23.8698	24.1155	23.8311	24.3543	24.6073	NaN	NaN	NaN	NaN	NaN	NaN	NaN	NaN	NaN	NaN	NaN	NaN	NaN	NaN	NaN		+			0.232862	0.806661	0	0	G_PP1_G_WT	flagellar outer arm dynein-associated protein, putative	PBANKA_0504300.1-p1	4	4	57.4	57.4	57.4	11.584	0	32.368	362500000
NaN	NaN	NaN	NaN	NaN	26.2268	25.2887	26.0972	25.9926	25.6649	25.0495	24.9869	25.2364	24.9764	24.9941	24.2633	24.9647	25.0488	24.2842	25.2982	25.4583	25.5334	25.816	26.0456	26.155	24.696	24.2623	25.0346	25.0653	24.896	+	+			-2.21233	0.805361	-0.0190113	1.01081	G_I2_G_WT;G_PP1_G_WT	protein transport protein SEC61 subunit alpha, putative	PBANKA_1359000.1-p1	6	5	12.1	12.1	9.7	52.298	0	12.814	951540000
28.5034	28.4567	28.6589	28.3266	28.8275	27.9805	27.7818	27.9114	27.9991	27.943	28.167	28.3789	28.1208	27.6493	28.1709	28.8066	28.7596	28.9707	28.4548	28.6266	28.3444	27.7186	28.2978	27.9854	28.1714	27.7293	28.1816	27.3514	27.8075	28.6347					0.45727	-0.1742	0.782777	0.16261		glutathione peroxidase-like thioredoxin peroxidase	PBANKA_0610500.1-p1	7	7	48.5	48.5	48.5	23.557	0	259.36	6931000000
26.6707	26.2257	25.4533	25.7523	26.2954	26.8283	26.8281	27.2486	27.4095	27.1735	26.4619	26.1793	26.3702	26.3807	26.0791	25.893	25.5392	25.3855	25.8727	25.031	27.104	28.6048	28.5762	28.1498	28.4868	26.8755	26.1446	26.9682	26.8035	26.87		+		+	-0.214716	0.803378	-1.18806	1.45197	G_PP1_G_WT;S_PP1_S_WT	40S ribosomal protein S5, putative	PBANKA_1310800.1-p1	8	8	35.1	35.1	35.1	29.938	0	33.833	3281000000
24.9746	25.392	24.7852	24.715	24.8313	25.176	25.2455	25.0087	25.0176	24.9567	24.7897	24.4611	24.9358	24.9279	24.1805	NaN	NaN	NaN	24.1933	NaN	NaN	NaN	24.4507	NaN	NaN	NaN	NaN	NaN	NaN	NaN					0.280611	0.421902	0.480067	0.149628		conserved Plasmodium protein, unknown function	PBANKA_0818500.1-p1	11	11	21.4	21.4	21.4	77.587	0	22.768	473500000
27.808	28.0766	26.9593	27.809	28.2826	28.9104	28.1724	28.6293	28.7055	28.5553	27.6881	27.7904	27.8641	27.8073	27.8119	27.1379	27.0667	27.0969	27.1283	27.0932	27.3388	27.6421	28.0456	27.8257	27.8067	26.6959	26.4149	26.7166	26.7913	27.2332		+			-0.00527954	0.802213	0.334202	0.961382	G_PP1_G_WT	ATP-dependent RNA helicase DBP1, putative	PBANKA_1426900.1-p1	33	33	42.9	42.9	42.9	104.22	0	323.31	5905300000
25.3023	24.9849	23.9588	24.7169	24.7907	25.3307	25.2422	25.2725	25.3988	25.5331	24.6831	24.7965	24.8321	24.4634	23.9928	25.7275	25.4228	25.5167	25.7217	25.7143	26.2638	26.0962	26.8147	26.9369	26.7774	26.0115	25.8913	25.6411	25.8347	26.347		+			0.19716	0.801899	-0.324493	0.632683	G_PP1_G_WT	ethanolamine-phosphate cytidylyltransferase	PBANKA_1360500.1-p1	17	17	42.6	42.6	42.6	64.061	0	256.5	1219800000
25.4901	25.7654	25.4793	25.5142	25.4725	26.3252	26.3297	25.9037	25.7251	26.2204	25.8119	25.7392	25.8163	26.0083	25.4068	25.2738	25.5876	25.2589	25.5014	25.383	25.7128	25.631	25.951	25.8535	25.7973	25.764	25.1142	25.6129	25.8363	25.8925					-0.212196	0.344331	-0.243053	0.145158		protein phosphatase PPM2	PBANKA_0910200.1-p1	14	14	26	26	26	89.122	0	180.68	1256200000
25.3933	25.4935	25.5194	25.3046	25.2899	25.7369	25.8557	25.668	25.6057	25.6995	25.5768	25.6996	25.5731	25.5948	25.4071	25.8085	25.6772	25.7936	25.8041	25.9831	25.5392	25.3972	25.8821	25.5952	25.3262	25.3112	25.0099	25.4386	25.6854	25.5827					-0.17015	0.142891	0.407737	0.14239		eukaryotic translation initiation factor 2 subunit alpha	PBANKA_0212100.1-p1	7	7	23	23	23	37.376	0	21.522	1103800000
28.7881	28.8803	28.555	28.6754	29.1233	29.6488	29.5539	29.4242	29.4606	29.3335	29.6083	29.6645	29.6631	29.4526	29.3124	28.477	28.3621	28.5202	28.4994	28.6912	28.8842	28.8789	29.2533	29.1646	29.065	28.8571	28.5021	28.8874	28.8719	29.4253					-0.73576	-0.0559708	-0.398787	0.140435		T-complex protein 1 subunit zeta, putative	PBANKA_0107300.1-p1	25	25	53	53	53	61.433	0	323.31	13382000000
NaN	NaN	NaN	NaN	NaN	23.5198	NaN	23.1913	NaN	23.2516	NaN	NaN	NaN	NaN	NaN	NaN	NaN	NaN	NaN	NaN	24.1743	23.8003	24.3331	24.7413	24.6579	NaN	NaN	NaN	NaN	NaN		+		+	0	0.801692	0	1.82114	G_PP1_G_WT;S_PP1_S_WT	conserved Plasmodium protein, unknown function	PBANKA_0709800.1-p1	6	6	14.7	14.7	14.7	59.91	0	50.999	147370000
27.3664	27.7352	27.0072	27.2587	27.1113	27.6253	27.6061	27.6855	27.5733	27.7648	26.817	26.8073	26.948	26.9838	26.6998	26.8236	26.6462	26.685	27.2461	26.6765	26.965	27.0967	27.4867	27.2775	27.3223	26.4309	26.2948	26.7971	26.724	26.7425		+			0.444555	0.799791	0.217618	0.631748	G_PP1_G_WT	calcyclin binding protein, putative	PBANKA_1452600.1-p1	11	11	46	46	46	26.602	0	195.19	3448800000
NaN	NaN	NaN	NaN	NaN	NaN	NaN	NaN	NaN	NaN	NaN	NaN	NaN	NaN	NaN	NaN	NaN	NaN	NaN	NaN	22.1555	22.9625	22.7236	22.7861	23.6276	NaN	NaN	NaN	NaN	NaN					0	0	0	0.134785		60S ribosomal protein L7-2, putative	PBANKA_1131200.1-p1	2	2	9	9	9	30.59	0.00095831	2.729	35363000
26.8201	27.3608	26.6144	26.0415	27.1134	28.229	27.6096	27.7924	27.831	27.4621	27.9107	27.7962	27.6578	27.1822	27.0844	28.6003	28.5225	28.6178	29.0823	28.7763	28.9917	29.5346	29.4673	29.5832	29.7426	29.4484	29.5656	29.5747	29.3242	28.8044					-0.736204	0.258569	-0.623623	0.120408		high molecular weight rhoptry protein 3, putative	PBANKA_0416000.1-p1	35	35	36.2	36.2	36.2	105.07	0	169.57	8476800000
23.7083	NaN	NaN	NaN	23.7435	23.4596	23.3427	23.4166	23.0672	23.4079	NaN	22.9499	23.3848	NaN	23.2888	NaN	NaN	NaN	NaN	NaN	NaN	NaN	NaN	NaN	NaN	NaN	NaN	NaN	NaN	NaN		+			0.551749	0.791584	0	0	G_PP1_G_WT	AAA family ATPase, putative	PBANKA_0909500.1-p1	4	4	9	9	9	67.081	0	16.24	120860000
28.3455	28.4912	28.3086	28.0851	28.3254	28.4284	28.2954	28.2198	28.185	28.1785	28.2559	28.268	28.2398	28.1868	28.1135	28.0615	28.1513	28.1887	28.102	28.1865	27.9834	27.7464	28.1744	28.0791	28.1228	27.7779	27.6776	27.8572	27.8344	28.3883					0.0983387	0.0486118	0.230927	0.114152		V-type proton ATPase subunit B, putative	PBANKA_1003800.1-p1	19	18	59.1	59.1	56.3	55.828	0	323.31	6611100000
30.9234	31.0352	30.3566	30.7549	30.8911	30.8566	30.684	30.7057	30.6719	30.6964	30.4731	30.5197	30.5311	30.5917	30.5857	30.6391	30.4303	30.5523	30.4838	30.6431	30.6434	30.2437	30.6538	30.5691	30.5217	30.3347	30.0148	30.4104	30.6231	30.6803					0.251997	0.182667	0.137053	0.113664		elongation factor 2, putative	PBANKA_1314800.1-p1	34	33	47.8	47.8	46.4	93.374	0	323.31	36306000000
NaN	NaN	NaN	NaN	NaN	27.0764	26.4221	26.9786	27.662	26.4299	25.8026	25.9853	26.465	26.4602	25.9014	NaN	NaN	NaN	NaN	NaN	23.1197	NaN	23.5628	23.9494	NaN	NaN	NaN	NaN	22.9809	NaN	+	+			-4.04421	0.790903	0.15166	0.31498	G_I2_G_WT;G_PP1_G_WT	6-cysteine protein	PBANKA_1359700.1-p1	10	10	27.1	27.1	27.1	48.928	0	95.831	1031800000
NaN	NaN	NaN	NaN	NaN	24.1632	23.9123	23.0008	23.8138	23.5334	24.0323	24.1584	24.2035	24.5209	24.0988	NaN	NaN	NaN	NaN	NaN	NaN	NaN	23.6104	NaN	NaN	NaN	NaN	NaN	NaN	23.6136	+				-2.02215	-0.518074	0.238171	0.109763	G_I2_G_WT	ATP synthase (C/AC39) subunit, putative	PBANKA_1328100.1-p1	7	7	22.8	22.8	22.8	44.574	0	14.572	169260000
NaN	NaN	NaN	NaN	NaN	23.9663	23.6811	NaN	24.1593	NaN	22.7174	23.1628	22.3938	22.6619	22.851	NaN	NaN	NaN	NaN	NaN	NaN	23.798	23.9567	24.1151	23.6958	NaN	NaN	NaN	23.2736	NaN		+			-0.519078	0.789303	-0.579155	0.941496	G_PP1_G_WT	13 kDa ribonucleoprotein-associated protein, putative	PBANKA_0924400.1-p1	2	2	20.6	20.6	20.6	15.399	0	34.841	166360000
NaN	NaN	NaN	NaN	NaN	25.3653	25.2314	25.0055	25.3392	24.9223	24.1193	24.7707	24.103	24.5584	24.3791	NaN	NaN	NaN	NaN	NaN	NaN	NaN	NaN	NaN	NaN	NaN	NaN	NaN	NaN	NaN	+	+			-1.82142	0.78665	0	0	G_I2_G_WT;G_PP1_G_WT	leucine-rich repeat protein	PBANKA_0902600.1-p1	5	5	21.1	21.1	21.1	35.969	0	32.087	314270000
27.1857	27.4521	27.0012	27.0886	27.1614	27.7487	27.4273	27.586	27.4651	27.6384	26.819	26.8823	26.8207	26.8342	26.5832	26.7604	26.7905	26.9983	27.1103	27.0243	27.3461	27.2151	27.7246	27.5978	27.7031	27.1624	27.0648	27.0297	27.0909	27.4278		+			0.389944	0.785232	-0.218354	0.362225	G_PP1_G_WT	karyopherin alpha, putative	PBANKA_1425100.1-p1	13	13	31.9	31.9	31.9	61.11	0	323.31	3603000000
26.6911	26.9381	26.8833	25.4713	26.954	27.5262	26.8429	27.2609	27.2617	26.8242	27.1489	27.1153	27.0884	26.6087	26.6771	28.5998	28.5891	28.9337	28.6804	28.9775	28.4468	28.1785	28.5571	28.6512	28.7592	28.2426	28.2665	28.3766	28.5394	28.674					-0.34009	0.215511	0.336303	0.0987083		serine repeat antigen 3	PBANKA_0304900.1-p1	28	27	33.5	33.5	32.8	123.2	0	323.31	5687200000
26.0641	26.2878	25.9638	25.9083	25.9267	26.8833	26.858	26.3833	26.5166	26.5709	26.2441	26.3351	26.6863	26.5297	26.1421	25.9455	25.6316	26.042	26.2054	26.1965	26.2684	25.9414	26.2801	26.2989	26.122	26.0918	25.6512	26.0252	26.279	26.3735					-0.357319	0.254978	-0.0798916	0.0980412		centrin-2, putative	PBANKA_1310400.1-p1	6	6	39.3	39.3	39.3	19.369	0	117.09	1809700000
30.4469	30.3439	30.0727	30.1042	30.2697	30.6962	30.3024	30.3395	30.2766	30.3581	30.0279	30.1725	30.1287	29.9638	30.0603	28.6324	28.6292	28.8177	28.5754	28.5184	28.406	28.1085	28.5339	28.4044	28.1127	28.0382	27.7983	28.1795	28.0149	29.047					0.176866	0.32394	0.419051	0.0975372		calcium-dependent protein kinase 4	PBANKA_0615200.1-p1	20	20	41.1	41.1	41.1	60.589	0	218.54	17735000000
24.8072	25.0627	24.9743	24.3029	24.9745	24.4149	24.9362	24.5554	24.2153	24.3273	24.8386	24.7197	24.9587	24.8125	24.6689	24.1551	24.0108	24.2634	24.3392	24.1881	24.0989	24.3582	24.1238	24.4092	24.363	24.7278	24.5824	NaN	24.6547	24.94					0.0246513	-0.309866	0.0180672	0.0973869		inorganic pyrophosphatase, putative	PBANKA_0414100.1-p1	7	7	32.7	32.7	32.7	43.47	0	29.211	517700000
NaN	24.4273	NaN	NaN	23.3016	25.2982	25.0481	24.7396	24.9045	24.3825	24.8001	24.9284	25.3512	25.6327	24.8413	NaN	NaN	23.5019	NaN	NaN	24.64	23.9877	24.1412	24.1197	24.3303	24.9555	NaN	25.1343	25.259	NaN	+				-2.04472	-0.236148	-1.46756	0.0951351	G_I2_G_WT	DNA/RNA-binding protein Alba 2, putative	PBANKA_1359200.1-p1	5	5	31.2	31.2	31.2	23.564	0	12.004	458970000
25.7529	26.3371	26.117	26.0898	26.5332	26.9213	26.1347	26.6273	26.6512	26.4459	26.7596	26.8817	26.7539	26.7884	26.7497	26.8259	26.2471	26.7354	26.4923	27.0412	26.2658	25.6972	26.2406	26.2196	26.0817	25.5897	25.3766	25.8638	26.4359	26.766					-0.620691	-0.230618	0.662006	0.0945847		eukaryotic translation initiation factor 3 subunit D, putative	PBANKA_1206100.1-p1	17	17	34.8	34.8	34.8	62.206	0	106.7	1960400000
25.5814	27.0595	27.3758	26.756	27.3264	28.3356	27.459	27.8356	27.9331	27.6827	27.8786	27.7242	27.786	27.0604	27.2902	29.167	29.1327	29.2459	29.1657	29.7053	29.2702	28.973	29.2728	29.3053	29.5587	29.2125	28.8777	29.2758	29.4179	29.1977					-0.728075	0.301308	0.0869892	0.0796688		serine repeat antigen 2	PBANKA_0305000.1-p1	28	28	35.5	33.9	33.9	123.98	0	323.31	9048800000
24.6388	25.7883	25.3125	23.0437	25.9219	25.1402	25.2675	25.1851	25.1567	24.8404	24.8231	24.9813	24.9921	24.8605	24.7761	27.2366	27.0482	27.0465	27.0208	27.2287	26.8621	26.7199	27.2731	27.0569	27.3046	26.9736	26.8904	26.9516	26.9409	27.0951					0.0543812	0.231355	0.145855	0.0730091		S-adenosylmethionine synthetase, putative	PBANKA_0823100.1-p1	15	15	45.3	45.3	45.3	45.098	0	57.874	1814600000
24.6667	NaN	NaN	NaN	NaN	25.5801	25.9723	26.0129	25.8446	25.9855	24.849	24.7351	25.5208	25.2557	25.1185	25.247	24.9319	24.605	25.5897	24.3204	27.1335	28.3251	28.4305	28.1278	28.3817	26.1075	25.2615	26.305	25.8661	26.3574	+	+		+	-1.74592	0.783294	-1.04069	2.1002	G_I2_G_WT;G_PP1_G_WT;S_PP1_S_WT	60S ribosomal protein L2, putative	PBANKA_1231700.1-p1	4	3	22.7	22.7	19.6	27.89	0	44.948	2227500000
NaN	24.1243	23.5432	24.375	24.6686	24.72	24.8289	25.211	24.8779	24.652	24.215	24.1193	24.063	23.9262	24.0691	24.2674	23.917	24.0637	24.1654	23.9937	24.3237	24.339	24.7647	24.3209	24.3286	23.8712	23.9424	24.3352	24.4423	24.444		+			0.0102493	0.77946	-0.125582	0.208338	G_PP1_G_WT	actin-like protein, putative	PBANKA_1104800.1-p1	11	11	26.3	26.3	26.3	64.701	0	26.639	501660000
NaN	NaN	NaN	NaN	24.224	25.0937	24.6876	25.0243	25.0514	24.8066	24.4897	24.0574	24.3189	24.7928	24.389	NaN	NaN	NaN	NaN	NaN	NaN	NaN	NaN	NaN	23.715	NaN	NaN	NaN	NaN	23.8689	+				-1.76198	0.523137	-0.531293	0.0682167	G_I2_G_WT	endoplasmic reticulum oxidoreductin, putative	PBANKA_0924300.1-p1	5	5	16.1	16.1	16.1	54.48	0	39.079	297690000
27.6079	27.6396	27.2077	27.0897	27.146	28.2971	28.1139	28.3845	28.3075	28.3699	27.3519	27.3313	27.5219	27.7499	27.6422	26.4724	26.4181	26.5298	26.7585	26.6613	27.3957	27.4998	27.8452	27.6763	27.7823	26.8701	26.0512	26.8634	27.3385	27.0623		+			-0.181231	0.775148	-0.269078	0.802743	G_PP1_G_WT	membrane associated histidine-rich protein 1a	PBANKA_1145800.1-p1	5	5	34.6	34.6	34.6	20.369	0	130.77	4721000000
24.6866	24.8894	24.0566	24.2023	24.3514	24.2974	24.1201	23.9431	23.7551	24.2256	23.8656	23.9186	24.255	23.4565	23.5821	24.92	24.6992	24.4777	24.9834	24.4543	24.6481	24.3111	24.5732	24.6527	24.7598	24.6102	24.609	24.42	24.0178	24.9628					0.621698	0.252691	0.182951	0.0650112		SAP domain-containing protein, putative	PBANKA_0813500.1-p1	9	9	42.1	42.1	42.1	28.217	0	31.098	497870000
26.3541	26.2484	25.9206	26.0516	26.3746	26.2148	26.1219	26.2087	26.2088	26.0062	26.2258	26.3208	26.1293	26.2705	26.0382	26.1928	26.0895	26.3845	26.109	26.4193	25.9831	25.6193	26.0545	26.0749	26.0534	25.7378	25.352	25.8459	26.1354	26.3925					-0.007061	-0.0448338	0.346313	0.0643311		translation elongation factor EF-1, subunit alpha, putative	PBANKA_0924900.1-p1	7	7	17.5	17.5	17.5	59.974	0	33.504	1560800000
26.1645	26.4272	26.2542	26.1863	26.0779	26.9623	27.1297	27.1329	27.0375	26.9485	26.3195	26.445	26.3399	26.1221	26.1348	26.7195	26.5863	26.4405	26.8182	26.6763	26.837	26.7244	27.2326	27.1523	27.1436	26.5197	26.3552	26.2244	26.4122	26.7424		+			-0.0502224	0.769916	0.197398	0.567203	G_PP1_G_WT	26S proteasome regulatory subunit RPN11, putative	PBANKA_1144000.1-p1	12	12	42.8	42.8	42.8	35.152	0	52.829	2550500000
NaN	NaN	23.3022	NaN	23.7632	23.5687	NaN	23.3639	23.1226	23.6029	NaN	23.3794	23.6061	NaN	NaN	25.3091	24.3543	24.6986	24.7607	24.5065	24.2133	24.3566	24.7507	24.6068	24.185	24.2575	23.4234	24.5249	24.3818	25.217					0.212682	0.455306	0.364938	0.061562		conserved Plasmodium protein, unknown function	PBANKA_1323200.1-p1	9	9	12.7	12.7	12.7	97.463	0	22.939	333130000
NaN	NaN	NaN	NaN	NaN	24.5558	24.5467	24.482	24.609	24.6495	24.2564	24.0985	24.1287	24.2745	NaN	NaN	NaN	NaN	NaN	NaN	24.2857	NaN	24.5591	NaN	24.3044	24.6789	24.5897	24.182	NaN	24.4691		+	+		-0.909758	0.769586	-1.61345	-0.71184	G_PP1_G_WT;S_I2_S_WT	polyubiquitin binding protein, putative	PBANKA_1139400.1-p1	9	9	12.8	12.8	12.8	99.91	0	10.563	361940000
NaN	NaN	23.5151	NaN	NaN	24.3702	24.6093	24.6276	24.6187	24.6845	23.7242	23.8808	23.7519	23.8639	23.8539	NaN	23.5192	23.6672	24.2453	23.9791	24.6217	24.6286	24.8879	25.0737	25.1483	23.6809	23.4862	24.2736	24.3543	23.701		+			-0.861649	0.767145	-0.381444	0.972809	G_PP1_G_WT	ER lumen protein retaining receptor 1, putative	PBANKA_1345400.1-p1	3	3	13.4	13.4	13.4	32.775	0	11.158	429980000
NaN	NaN	NaN	NaN	NaN	23.5218	22.7045	23.6048	23.0434	23.5587	22.9173	NaN	22.8793	22.7906	22.8498	NaN	NaN	NaN	NaN	NaN	NaN	22.7139	NaN	22.9201	23.0339	NaN	NaN	NaN	NaN	NaN		+			0.42905	0.765618	0	0.277011	G_PP1_G_WT	CLPTM1 domain-containing protein, putative	PBANKA_0911400.1-p1	3	3	5.1	5.1	5.1	76.926	0.00050607	3.3305	111790000
26.7715	26.7819	26.4937	26.5926	26.7073	27.247	27.0868	26.9224	26.9677	26.976	26.7008	26.7191	26.8088	26.96	26.7392	26.1994	26.0008	26.1708	26.3173	26.4305	26.7192	25.9722	26.6382	26.614	26.6167	26.5077	26.2827	26.459	26.4032	26.6351					-0.116164	0.254395	-0.233759	0.054549		cAMP-dependent protein kinase regulatory subunit, putative	PBANKA_1438000.1-p1	10	10	29.1	29.1	29.1	49.671	0	166.43	2339500000
25.3107	25.9476	25.2477	25.458	25.5191	26.8728	26.9108	27.3044	27.5244	27.2381	26.3543	26.2983	26.5511	26.6238	26.2069	25.7931	25.042	25.5098	26.3066	25.0757	27.6794	28.8471	28.86	28.5308	28.7964	26.9563	26.2744	27.1538	26.9556	27.0792	+	+	+	+	-0.91027	0.763216	-1.33843	1.65887	G_I2_G_WT;G_PP1_G_WT;S_I2_S_WT;S_PP1_S_WT	40S ribosomal protein S3A, putative	PBANKA_1215600.1-p1	13	13	39.7	39.7	39.7	29.984	0	201.78	3575400000
25.6555	26.2571	25.9232	26.3474	25.8902	25.9946	25.3832	25.7109	25.4686	25.5791	25.2363	25.6203	25.6506	25.6728	25.7449	25.8194	25.1098	24.7038	24.7162	NaN	24.8549	24.5246	24.7889	NaN	24.5197	24.9065	24.551	NaN	NaN	25.2133					0.429664	0.04226	0.4255	0.0536427		WD repeat-containing protein 16, putative	PBANKA_1361500.1-p1	12	12	18.7	18.7	18.7	85.053	0	102.03	923600000
26.5131	26.7857	26.383	26.3595	26.5676	26.9587	26.6745	26.8649	26.826	26.9268	26.0201	26.5063	26.5596	26.2255	26.2431	25.824	25.838	26.1682	25.9972	26.0448	25.6965	25.9577	26.0989	25.9955	25.7326	25.4391	25.8176	25.7889	25.6737	26.4939					0.210863	0.539279	0.131833	0.0536167		ras-related protein Rab-11B, putative	PBANKA_1354100.1-p1	10	9	45.6	45.6	40.8	25.82	0	51.662	1932900000
28.7849	28.7903	28.7283	28.5881	28.8375	28.5238	28.6309	28.6011	28.589	28.504	29.0232	29.0481	28.9465	28.8576	28.7844	28.7363	28.4944	28.7513	28.6483	29.0575	28.5561	27.6501	28.6545	28.2633	28.1859	28.0197	27.4937	28.2251	28.5347	28.7879					-0.186159	-0.362199	0.52531	0.0497528		hexokinase, putative	PBANKA_1122900.1-p1	18	18	40.5	40.5	40.5	55.459	0	323.31	9172300000
26.8188	27.159	26.3793	27.1313	26.9874	26.8419	27.0068	26.9383	26.8497	26.7223	26.7762	26.5795	27.0607	26.949	26.6411	27.046	26.6451	26.7071	27.0206	26.9422	27.018	26.4871	27.0736	26.8696	26.6458	26.7488	26.3806	26.7737	26.8832	27.0764					0.0938766	0.0705059	0.0996948	0.0462784		eukaryotic translation initiation factor 2 subunit gamma, putative	PBANKA_1031900.1-p1	13	12	35.7	35.7	34	51.262	0	168.04	2654300000
26.4987	26.202	25.8966	25.5776	26.3457	26.5866	26.3269	26.1066	26.2203	26.3829	26.1599	26.3535	26.6013	26.4256	26.2363	27.4041	27.5841	27.0653	27.4273	27.1974	27.0525	26.8942	26.9493	27.0903	26.9428	26.9999	26.6934	26.8251	26.8447	27.3356					-0.2512	-0.0306515	0.395913	0.0460907		alanine--tRNA ligase, putative	PBANKA_1143600.1-p1	34	33	29.6	29.6	28.9	141.34	0	272.85	2416900000
28.1363	28.0125	27.623	27.6523	28.166	28.0101	28.0809	28.0553	28.0707	28.0302	27.6806	27.7603	27.795	27.6768	27.8413	27.0994	26.9587	26.9268	26.9846	27.1684	27.2683	27.1173	27.3156	27.4214	27.1783	27.2464	27.129	27.1326	26.9684	27.6201					0.167186	0.29861	-0.191704	0.0408962		mannose-1-phosphate guanyltransferase, putative	PBANKA_1022300.1-p1	20	20	59.9	59.9	59.9	47.078	0	323.31	4518100000
32.8951	33.0383	32.3376	32.4625	32.8946	33.7162	33.6024	33.5557	33.4748	33.4889	32.7711	32.7893	32.8141	32.9616	32.6897	31.1672	30.969	31.0916	31.2037	31.128	31.5824	31.5067	31.9169	31.7	31.595	31.3616	30.9354	31.278	31.2106	31.7417		+			-0.0795387	0.762459	-0.193561	0.35476	G_PP1_G_WT	tubulin beta chain, putative	PBANKA_1206900.1-p1	30	27	70.8	70.8	64.7	49.789	0	323.31	158830000000
NaN	NaN	NaN	NaN	NaN	23.403	23.0159	23.4126	23.3457	23.4	22.777	22.4119	22.9585	NaN	22.9913	NaN	NaN	NaN	NaN	NaN	23.0701	23.1367	23.975	23.6766	23.7088	22.4061	NaN	22.941	22.7303	22.9355		+			0.21895	0.761979	-0.597644	0.767378	G_PP1_G_WT	HECT-like E3 ubiquitin ligase, putative	PBANKA_0704500.1-p1	10	10	1.9	1.9	1.9	872.45	0	15.017	168890000
NaN	NaN	NaN	NaN	NaN	23.3492	23.1661	23.2904	23.4047	23.6903	22.7982	22.5547	22.5296	22.597	22.6162	NaN	NaN	NaN	NaN	NaN	23.0387	23.3884	23.2804	23.1254	23.0193	NaN	NaN	NaN	NaN	22.5598		+			-0.40495	0.761002	0.0644455	0.897126	G_PP1_G_WT	AP-1 complex subunit sigma, putative	PBANKA_0930000.1-p1	2	2	14.2	14.2	14.2	18.233	0	21.697	135230000
25.0851	24.8928	24.2534	25.2411	25.1171	26.0785	25.0976	25.585	25.4277	25.5412	24.5643	24.6363	24.9342	25.0326	24.7688	NaN	24.4695	24.7545	24.3994	NaN	24.8838	25.0743	25.4527	25.382	25.2864	23.8782	23.4643	23.9544	24.3684	24.6109		+		+	0.130652	0.758785	-0.239444	1.1606	G_PP1_G_WT;S_PP1_S_WT	protein SEY1, putative	PBANKA_1026600.1-p1	14	14	23.9	23.9	23.9	106.84	0	165.13	793230000
NaN	NaN	NaN	NaN	24.7405	24.2621	24.1246	24.1705	23.9388	24.4131	24.4225	24.1409	24.39	24.7351	24.0902	24.6185	24.6279	NaN	24.6064	24.612	24.521	24.382	24.3509	24.2924	24.1308	24.4289	23.791	24.4958	24.3506	24.4772					-0.922371	-0.173933	-0.258662	0.02668		conserved Apicomplexan protein, unknown function	PBANKA_0941100.1-p1	9	9	49.8	49.8	49.8	30.003	0	31.092	407750000
26.8614	27.2489	26.6422	26.5599	27.1402	27.0514	26.8264	26.8961	26.8076	26.8767	26.3542	26.4804	26.3599	26.3128	26.5703	27.2641	27.006	26.9151	27.1634	26.8521	27.3056	26.8081	27.179	27.1397	26.9835	26.8305	26.9981	26.8113	26.9798	27.6644					0.475003	0.476107	-0.0166599	0.0263573		vacuolar protein sorting-associated protein 26, putative	PBANKA_1463200.1-p1	11	11	38.7	38.7	38.7	34.617	0	37.663	2721900000
24.122	24.5729	24.5163	24.5148	24.5304	25.5787	25.0939	25.6843	25.5199	25.4023	24.4395	24.554	24.8822	24.8892	24.726	NaN	NaN	NaN	NaN	NaN	23.4573	NaN	23.56	23.4143	NaN	NaN	NaN	NaN	NaN	23.3667		+			-0.246886	0.757635	-0.358447	0.587217	G_PP1_G_WT	chromosome assembly factor 1, putative	PBANKA_1101600.1-p1	13	13	20.2	20.2	20.2	107.22	0	107.01	495040000
25.9612	25.8302	25.5506	25.656	25.9765	25.4567	25.5973	25.6098	25.312	25.4573	25.3668	25.5914	25.373	25.44	25.3848	25.6199	25.51	25.9931	26.1854	25.6574	26.2028	26.0681	26.5432	26.4265	26.1644	26.2983	26.1092	26.1766	26.0983	26.6082					0.363734	0.0554417	-0.464956	0.0228409		hydroxymethyldihydropterin pyrophosphokinase-dihydrop	PBANKA_1426700.1-p1	13	13	25.9	25.9	25.9	79.791	0	67.609	1289300000
26.9927	27.2889	26.3831	26.4086	27.1451	25.9766	25.9589	25.9997	25.8641	25.951	26.0548	25.9673	26.5424	25.9921	25.9471	26.918	26.7603	26.9861	26.7809	26.2629	26.4735	26.528	26.8446	26.6995	26.6633	26.5127	26.615	26.5714	26.5257	26.8779					0.742939	-0.150686	0.121104	0.0212334		chaperone binding protein, putative	PBANKA_1348900.1-p1	11	11	30.6	30.6	30.6	61.001	0	148.88	2016400000
28.4289	28.534	28.5501	28.7412	28.9023	29.1724	28.7349	28.8488	28.9991	28.8136	29.103	29.083	29.1899	29.2671	28.9652	28.4801	28.3035	28.5707	28.591	29.007	28.6686	28.1241	28.4977	28.5279	28.4827	28.5251	27.4862	28.6557	28.8859	28.6444					-0.490355	-0.207896	0.150994	0.0207325		elongation factor 1-gamma, putative	PBANKA_1352000.1-p1	19	19	43.4	43.4	43.4	46.785	0	262.52	9704400000
24.4033	24.2002	24.0949	24.5839	24.4533	23.9086	23.8386	23.8427	23.5342	23.5989	23.801	23.8639	24.1958	24.332	24.3853	25.361	25.0225	25.5067	24.7904	25.1161	24.5678	NaN	24.2549	24.3263	24.1454	24.0571	NaN	24.3915	24.406	24.6889					0.231514	-0.371019	1.10002	0.019635		clustered-asparagine-rich protein, putative	PBANKA_1450700.1-p1	5	5	16.9	16.9	16.9	45.674	0	42.671	439050000
32.9391	32.9258	32.307	32.7365	32.4925	33.2014	33.1604	33.2528	33.1567	33.1284	32.3828	32.3244	32.5077	32.4444	32.4615	31.7198	31.6266	31.8013	31.6448	31.8021	32.2358	32.4621	32.6024	32.6806	32.6806	31.6848	31.3737	31.7785	31.9845	31.79		+			0.256014	0.755789	-0.00340538	0.809959	G_PP1_G_WT	heat shock protein 70	PBANKA_0711900.1-p1	38	34	52.5	52.5	44.4	75.22	0	323.31	143840000000
25.571	24.7499	25.9657	24.3713	25.6545	26.4137	25.911	25.8516	26.1878	25.9533	26.3148	26.3291	26.5098	26.4114	26.222	27.3001	27.0531	27.5109	27.4328	27.2823	28.0355	27.5104	28.1073	27.9073	28.1975	27.7889	28.4014	27.7087	27.8638	27.9162	+				-1.09497	-0.293953	-0.619955	0.0158123	G_I2_G_WT	CUGBP Elav-like family member 1, putative	PBANKA_1135700.1-p1	15	15	39.1	39.1	39.1	57.187	0	323.31	3314000000
27.9168	27.9922	27.607	27.4911	28.2572	28.2344	27.921	28.1116	28.0528	28.1507	28.163	28.313	28.107	27.6641	27.9111	27.9962	27.767	27.9204	28.0979	27.9826	27.4313	26.8332	27.4763	27.4211	27.2483	26.8218	27.3823	26.64	27.2367	28.2528					-0.178798	0.0624897	0.686105	0.0153133		conserved Plasmodium protein, unknown function	PBANKA_1120100.1-p1	35	35	32.3	32.3	32.3	150.46	0	323.31	5299000000
24.7166	24.7704	24.5079	24.487	24.4945	24.8468	24.8195	24.8131	24.9992	24.7833	24.7456	24.6779	24.634	24.9449	25.0587	24.6074	24.4651	24.8638	24.687	24.7714	24.6171	24.0705	24.7561	24.4431	NaN	NaN	23.98	24.5394	24.5161	24.7757					-0.216956	0.0401402	0.747433	0.0113571		conserved protein, unknown function	PBANKA_1348100.1-p1	3	3	17.3	17.3	17.3	27.101	0	28.027	562310000
24.9525	27.1971	26.3485	24.8153	27.2042	28.957	28.2011	28.6234	28.5511	28.3995	28.8706	28.7436	28.6103	27.6611	27.7801	28.9728	29.0741	29.0171	29.7845	29.1278	30.1368	30.3369	30.4821	30.6259	30.6579	30.4693	30.8521	30.5058	30.2741	30.1164	+		+		-2.22961	0.213274	-1.24829	0.00437279	G_I2_G_WT;S_I2_S_WT	cytoadherence linked asexual protein, putative	PBANKA_1400600.1-p1	53	53	45.4	45.4	45.4	152.16	0	323.31	15083000000
26.9125	27.1455	27.4513	26.2788	27.2502	27.9362	27.9088	27.9929	27.9472	28.1593	27.2702	27.4781	27.3415	27.3612	26.7256	23.6599	24.7972	25.0031	25.7908	24.9727	25.1185	24.0288	25.6174	22.607	23.6823	23.4992	NaN	NaN	NaN	25.5163		+	+		-0.227637	0.753574	1.91035	1.27639	G_PP1_G_WT;S_I2_S_WT	dynein intermediate chain, putative	PBANKA_1018300.1-p1	21	21	42.9	42.9	42.9	69.652	0	323.31	2597900000
25.1193	26.5558	23.6033	23.4794	25.4482	22.94	22.8455	NaN	23.0095	NaN	23.7019	NaN	24.4661	24.1101	23.5135	23.1073	NaN	22.8841	NaN	NaN	NaN	NaN	NaN	NaN	NaN	NaN	NaN	NaN	NaN	NaN	+				1.45082	-0.834146	0.194464	0	G_I2_G_WT	conserved Plasmodium protein, unknown function	PBANKA_0828900.1-p1	5	5	14.2	14.2	14.2	44.434	0	11.891	211800000
NaN	NaN	NaN	NaN	NaN	25.3121	25.2153	25.1311	25.219	25.2488	24.2864	24.4913	24.5769	24.6366	24.3731	NaN	NaN	NaN	NaN	NaN	23.4361	NaN	23.5291	NaN	NaN	NaN	NaN	24.0859	NaN	NaN	+	+			-1.73028	0.752416	0.122527	0.102499	G_I2_G_WT;G_PP1_G_WT	HSP20-like chaperone, putative	PBANKA_1463900.1-p1	6	6	40.4	40.4	40.4	21.594	0	12.366	352170000
NaN	NaN	NaN	NaN	NaN	21.97	22.0496	21.8582	21.8731	21.6994	NaN	NaN	21.2861	21.675	NaN	NaN	NaN	NaN	NaN	NaN	NaN	NaN	NaN	NaN	NaN	NaN	NaN	NaN	NaN	NaN	+				1.07541	-0.105311	0	0	G_I2_G_WT	conserved Plasmodium protein, unknown function	PBANKA_0522000.1-p1	3	3	7.5	7.5	7.5	55.137	0.0005048	3.3119	31202000
NaN	22.4501	NaN	NaN	22.6989	NaN	NaN	NaN	NaN	NaN	NaN	NaN	NaN	NaN	NaN	22.9365	22.9402	22.9751	22.7077	22.5592	NaN	NaN	NaN	NaN	NaN	NaN	NaN	NaN	NaN	NaN	+				1.00384	0	0.404382	0	G_I2_G_WT	conserved Plasmodium protein, unknown function	PBANKA_1236800.1-p1	4	4	6.8	6.8	6.8	80.069	0	6.1581	55224000
23.7602	23.4368	23.4629	NaN	NaN	NaN	NaN	NaN	NaN	NaN	NaN	NaN	NaN	NaN	NaN	24.8597	24.4253	24.4136	25.0435	24.4646	NaN	NaN	NaN	NaN	NaN	NaN	NaN	NaN	NaN	NaN			+		0.968594	0	2.15953	0	S_I2_S_WT		V9GXG1	8	8	10.9	10.9	10.9	101.69	0	14.6	221290000
NaN	NaN	NaN	NaN	NaN	24.2862	23.7545	23.9511	23.7203	23.9553	NaN	23.8008	23.2226	23.2846	23.1716	NaN	NaN	NaN	NaN	NaN	NaN	NaN	NaN	NaN	NaN	NaN	NaN	NaN	NaN	NaN		+			-0.786497	0.746159	0	0	G_PP1_G_WT	conserved Plasmodium protein, unknown function	PBANKA_0720000.1-p1	6	6	8.9	8.9	8.9	86.628	0	12.504	137010000
26.6348	26.7984	26.3003	25.9573	26.971	27.4322	27.3829	27.2587	27.3239	27.187	26.7216	26.5941	26.6488	26.499	26.3931	25.3496	25.3121	25.3091	25.5791	24.8762	25.4039	25.8478	26.3286	26.3629	26.1157	25.8929	25.116	25.6955	25.647	26.1937		+			-0.0389309	0.745628	-0.423804	0.302745	G_PP1_G_WT	cytidine triphosphate synthetase, putative	PBANKA_1032300.1-p1	24	24	39.8	39.8	39.8	85.871	0	167	2166600000
NaN	NaN	NaN	NaN	22.7833	NaN	NaN	NaN	NaN	NaN	NaN	NaN	NaN	NaN	NaN	23.0801	22.9691	22.9781	23.2494	22.8683	NaN	NaN	NaN	NaN	NaN	NaN	NaN	NaN	NaN	NaN					0.837657	0	0.741626	0		ubiquitin-like protein, putative	PBANKA_0916400.1-p1	5	5	8.9	8.9	8.9	87.968	0	10.583	137580000
28.0869	28.0498	27.344	27.211	27.9907	28.1784	27.9607	28.0323	27.8465	27.8398	27.6615	27.4496	27.2829	26.9791	26.7599	28.8168	28.537	28.7146	28.7678	28.97	28.234	27.7398	28.2155	28.0562	28.1356	27.9993	27.6702	27.6514	27.7234	28.3304		+			0.509884	0.744931	0.886325	0.201263	G_PP1_G_WT	tryptophan-rich protein	PBANKA_0524300.1-p1	18	18	48.3	48.3	48.3	43.729	0	323.31	6336300000
NaN	NaN	NaN	NaN	NaN	24.5654	24.4602	24.6702	24.4761	24.4285	23.6579	24.0636	23.909	23.3572	23.8944	NaN	NaN	NaN	NaN	NaN	23.8397	23.9579	23.9076	24.083	24.0744	NaN	23.5052	23.4002	23.5132	23.7877		+			-0.501587	0.743697	-0.495025	0.809047	G_PP1_G_WT	GTPase-activating protein, putative	PBANKA_1336300.1-p1	12	12	25.9	25.9	25.9	72.069	0	94.309	336990000
NaN	23.2794	22.6041	NaN	23.2559	23.8656	23.2437	23.8217	23.63	23.6241	22.9742	22.9537	23.134	23.3802	NaN	NaN	NaN	NaN	NaN	NaN	NaN	NaN	NaN	NaN	NaN	NaN	NaN	NaN	NaN	NaN		+			-0.123661	0.73287	0	0	G_PP1_G_WT	conserved Plasmodium protein, unknown function	PBANKA_1026700.1-p1	3	3	14	14	14	26.095	0	4.8446	123890000
NaN	NaN	NaN	NaN	25.4585	25.5828	24.9715	25.5819	25.7251	25.5431	24.4488	24.5509	25.1073	24.7369	24.9307	25.6065	NaN	25.391	25.8338	NaN	25.0097	25.1467	25.5768	25.348	25.2652	24.2844	24.4728	24.734	24.9971	25.263	+	+			-1.53047	0.725952	-0.716598	0.519029	G_I2_G_WT;G_PP1_G_WT	translation initiation factor IF-2, putative	PBANKA_0105600.1-p1	17	17	24.9	24.9	24.9	106.72	0	31.167	846140000
NaN	NaN	NaN	NaN	NaN	25.941	25.8566	25.7402	25.6889	25.9532	25.0113	24.8498	25.0119	25.5594	25.1432	NaN	NaN	NaN	NaN	NaN	23.6786	24.1108	24.104	NaN	NaN	NaN	NaN	24.3354	NaN	NaN	+	+			-2.42079	0.720883	-0.329974	0.476564	G_I2_G_WT;G_PP1_G_WT	conserved Plasmodium protein, unknown function	PBANKA_0810800.1-p1	14	14	31.1	31.1	31.1	66.628	0	53.043	519640000
NaN	NaN	NaN	NaN	NaN	22.2782	21.7157	21.8511	22.2043	22.2767	NaN	NaN	22.0972	NaN	NaN	NaN	NaN	NaN	NaN	NaN	NaN	NaN	NaN	NaN	NaN	NaN	NaN	NaN	NaN	NaN					0.546058	0.11074	0	0		RNA-binding protein, putative	PBANKA_1454800.1-p1	4	4	3	3	3	212.74	0	10.311	33220000
NaN	25.8868	24.7035	26.1916	26.1823	27.1294	26.4628	27.2495	27.2291	26.9286	26.0181	26.3424	26.1042	26.2485	26.6946	26.7335	26.3423	26.9959	25.7886	27.1549	26.8329	26.7197	27.109	27.3324	27.276	26.4607	26.3289	26.2069	26.6688	26.8738		+			-1.1077	0.718351	0.0951969	0.546156	G_PP1_G_WT	eukaryotic translation initiation factor 3 subunit I, putative	PBANKA_0614500.1-p1	13	13	43.1	43.1	43.1	37.213	0	106.81	2427500000
NaN	NaN	NaN	NaN	23.1094	NaN	NaN	NaN	NaN	NaN	NaN	NaN	NaN	NaN	NaN	23.2855	23.1038	23.1446	23.2067	23.3151	NaN	NaN	NaN	NaN	NaN	NaN	NaN	NaN	NaN	NaN					0.406996	0	1.10861	0		conserved Plasmodium protein, unknown function	PBANKA_0613500.1-p1	5	5	18.8	18.8	18.8	42.667	0	4.6295	122620000
NaN	NaN	NaN	NaN	25.3868	26.9493	26.4857	26.7609	26.8369	26.7675	26.1088	25.8408	26.2701	26.3403	25.6764	25.351	24.9491	24.9642	26.2026	24.9294	28.1471	29.2449	29.3006	29.3293	29.2109	27.2273	26.0243	27.3261	26.8312	27.1137	+	+	+	+	-2.92918	0.712762	-1.62526	2.14203	G_I2_G_WT;G_PP1_G_WT;S_I2_S_WT;S_PP1_S_WT	60S ribosomal protein L6, putative	PBANKA_1338300.1-p1	8	8	43.7	43.7	43.7	21.646	0	135.69	3899600000
NaN	NaN	NaN	NaN	22.7792	NaN	NaN	NaN	NaN	NaN	NaN	NaN	NaN	NaN	NaN	23.4298	22.7364	23.1985	23.3572	23.3926	NaN	NaN	NaN	NaN	NaN	NaN	NaN	NaN	NaN	NaN					0.328681	0	0.878085	0		conserved Plasmodium protein, unknown function	PBANKA_0830450.1-p1	2	2	9	9	9	40.226	0	15.223	92401000
26.0778	26.4344	25.4408	26.333	26.3003	27.5416	27.2232	27.5382	27.5738	27.3339	26.7558	26.734	26.8816	26.8037	26.489	26.4749	26.3228	26.4875	26.6428	26.2757	28.2427	28.8337	28.9695	28.6915	28.7585	27.3261	26.4642	27.3627	27.2802	27.1445		+		+	-0.615574	0.709319	-0.6748	1.58367	G_PP1_G_WT;S_PP1_S_WT	60S ribosomal protein L12, putative	PBANKA_1231800.1-p1	6	6	43.6	43.6	43.6	18.214	0	116.92	4337000000
NaN	NaN	NaN	NaN	NaN	22.6595	22.4453	22.3703	22.7209	22.6975	NaN	NaN	21.6614	NaN	NaN	NaN	NaN	NaN	NaN	NaN	NaN	NaN	NaN	NaN	NaN	NaN	NaN	NaN	NaN	NaN					0.312863	0.477497	0	0		conserved Plasmodium protein, unknown function	PBANKA_1406500.1-p1	2	2	4.2	4.2	4.2	81.377	0	49.838	54403000
NaN	NaN	NaN	22.5573	NaN	NaN	NaN	NaN	NaN	NaN	NaN	NaN	NaN	NaN	NaN	22.9187	22.9393	22.9379	23.1039	22.7273	NaN	NaN	NaN	NaN	NaN	NaN	NaN	NaN	NaN	NaN					0.299094	0	1.0016	0		exosome complex component RRP45, putative	PBANKA_1140400.1-p1	4	4	11.4	11.4	11.4	59.281	0	5.5364	67542000
NaN	24.6175	NaN	NaN	25.0332	25.7876	26.0239	26.1908	25.9094	26.1646	25.2769	25.438	25.0856	25.4342	25.3062	24.8895	24.6593	NaN	25.9792	24.2959	27.2187	28.0736	28.0223	28.0857	28.1888	26.4416	26.0315	26.7609	26.3598	26.7534	+	+	+	+	-1.64409	0.707077	-2.15394	1.44839	G_I2_G_WT;G_PP1_G_WT;S_I2_S_WT;S_PP1_S_WT	60S ribosomal protein L10, putative	PBANKA_1028400.1-p1	6	6	26.5	26.5	26.5	25.246	0	81.263	2009900000
25.4595	25.3224	25.4417	24.4251	25.4586	26.1036	26.2985	27.2817	26.7813	26.5191	25.7013	26.1174	26.2464	25.8392	25.6158	NaN	NaN	NaN	NaN	NaN	NaN	23.5755	23.8433	23.3805	23.229	24.0838	22.5778	NaN	23.1429	23.8943		+			-0.682552	0.692827	-1.32123	-0.0682423	G_PP1_G_WT	dynein intermediate chain, putative	PBANKA_0822900.1-p1	16	16	24.3	24.3	24.3	93.53	0	52.756	970150000
28.9023	29.6364	28.6421	29.7122	29.3906	31.6053	30.9304	31.5338	31.3988	31.3987	30.502	30.3185	30.8839	31.1964	30.522	26.3606	26.0701	26.7993	26.9898	27.8456	27.4761	27.4017	28.8525	28.0678	27.5861	26.2744	24.686	26.721	27.9964	27.2315	+	+			-1.42783	0.688866	0.231244	1.29501	G_I2_G_WT;G_PP1_G_WT	osmiophilic body protein G377	PBANKA_1463000.1-p1	122	122	51.2	51.2	51.2	309.21	0	323.31	26005000000
NaN	NaN	NaN	23.2994	23.711	NaN	NaN	NaN	NaN	NaN	NaN	NaN	NaN	NaN	NaN	23.5548	23.187	23.3772	23.1158	23.5112	NaN	NaN	NaN	NaN	NaN	NaN	NaN	NaN	NaN	NaN					0.174339	0	1.0358	0		SUMO-conjugating enzyme UBC9, putative	PBANKA_0816100.1-p1	3	3	40.3	40.3	40.3	18.186	0	36.242	109760000
25.5608	24.8017	25.5501	25.2539	24.8798	25.6861	25.748	25.7624	25.8449	25.6058	25.0077	25.0485	25.0746	25.0398	25.103	24.6301	25.0485	25.1098	24.0219	NaN	24.7224	24.5948	25.056	24.8688	24.6336	NaN	NaN	NaN	24.33	24.6166		+		+	0.154557	0.674727	1.40153	1.79533	G_PP1_G_WT;S_PP1_S_WT	V-type proton ATPase subunit E, putative	PBANKA_0835300.1-p1	4	4	17.9	17.9	17.9	27.263	0	29.689	777620000
22.8391	23.6556	NaN	24.5536	23.8746	25.7855	26.5208	26.876	26.366	26.2903	25.7828	25.5445	25.9317	25.6516	25.5659	26.4461	26.085	25.636	26.8417	24.6406	27.6241	29.1017	29.3565	29.1748	29.2401	26.8489	26.17	26.9083	26.3562	26.7869	+	+		+	-2.03138	0.672387	-0.68417	2.28537	G_I2_G_WT;G_PP1_G_WT;S_PP1_S_WT	60S ribosomal protein L3, putative	PBANKA_0511900.1-p1	11	10	33.7	33.7	31.3	44.366	0	83.328	3774400000
25.2982	25.025	24.1619	25.0728	25.2729	26.6207	26.5642	27.0288	27.0307	26.7427	26.1418	26.1023	26.2519	26.1885	25.9547	25.6438	25.3094	25.4051	26.4656	24.6046	27.5748	28.41	28.6334	28.4018	28.4881	26.7234	25.9945	26.7445	26.6481	27.0393	+	+		+	-1.16166	0.669569	-1.14424	1.67168	G_I2_G_WT;G_PP1_G_WT;S_PP1_S_WT	60S ribosomal protein L27, putative	PBANKA_1324400.1-p1	9	9	46.6	46.6	46.6	16.864	0	27.648	2990100000
NaN	NaN	NaN	NaN	NaN	25.1217	24.5398	24.7481	24.8715	24.7928	23.8926	24.1668	24.049	24.2466	24.3859	NaN	NaN	NaN	NaN	NaN	NaN	23.7454	NaN	NaN	NaN	NaN	NaN	NaN	NaN	NaN	+	+			-1.57521	0.666618	0	-0.370596	G_I2_G_WT;G_PP1_G_WT	conserved Plasmodium protein, unknown function	PBANKA_0307100.1-p1	13	13	8	8	8	253.96	0	24.232	298310000
NaN	NaN	NaN	NaN	NaN	24.2646	24.3337	24.7671	24.3728	24.4136	23.8035	23.5455	24.025	23.7558	23.7407	NaN	NaN	NaN	NaN	NaN	NaN	NaN	NaN	NaN	NaN	NaN	NaN	NaN	NaN	NaN	+	+			-1.37747	0.65626	0	0	G_I2_G_WT;G_PP1_G_WT	dynein intermediate light chain, putative	PBANKA_0414900.1-p1	7	7	13.5	13.5	13.5	83.125	0	13.514	183390000
27.2337	27.4503	27.09	27.4663	27.3568	28.0922	27.9655	27.9492	27.7826	27.8118	27.3746	27.242	27.3712	27.322	27.025	26.4708	26.5736	26.684	26.5919	26.9133	26.8254	27.0909	27.1408	26.9248	26.6547	26.2382	26.075	26.449	26.3956	26.9647		+			0.0524918	0.65332	0.222241	0.502853	G_PP1_G_WT	RuvB-like helicase 3, putative	PBANKA_1138200.1-p1	18	16	47.6	47.6	42.3	53.846	0	132.19	3698000000
NaN	NaN	NaN	NaN	24.0579	23.8934	23.7575	24.0672	23.7449	23.7934	22.9382	23.0404	23.3611	23.1636	23.4984	NaN	NaN	NaN	NaN	NaN	NaN	NaN	21.7779	NaN	NaN	NaN	NaN	NaN	NaN	NaN		+			-0.0217636	0.650946	0	-0.772187	G_PP1_G_WT	leucine-rich repeat protein	PBANKA_1331600.1-p1	4	4	19.4	19.4	19.4	29.118	0	10.805	153120000
26.4556	26.7806	26.1657	26.0812	26.4466	26.1905	26.7103	26.6337	26.4904	26.5734	26.0641	25.9049	25.882	25.8755	25.6529	26.7103	26.6668	26.5001	26.5706	26.7163	26.5198	26.565	26.8704	26.7465	26.6986	26.11	26.0675	25.9502	26.0066	26.331		+			0.510053	0.64378	0.539744	0.586993	G_PP1_G_WT	26S proteasome regulatory subunit RPN7, putative	PBANKA_0919000.1-p1	13	13	33.8	33.8	33.8	46.572	0	136.86	2011900000
25.959	26.3038	NaN	24.7478	25.929	27.1959	27.1729	27.2752	27.2282	27.2537	26.6255	26.693	26.5876	26.992	26.0182	25.4099	NaN	26.4331	26.2359	25.7477	NaN	25.6114	26.4507	25.9947	NaN	NaN	NaN	NaN	NaN	NaN	+	+	+	+	-1.61166	0.641922	3.60683	2.95716	G_I2_G_WT;G_PP1_G_WT;S_I2_S_WT;S_PP1_S_WT	alpha tubulin 1	PBANKA_0417700.1-p1	6	4	59.8	22.1	17.7	50.206	0	293.34	2019900000
NaN	NaN	NaN	NaN	NaN	22.907	23.1724	23.5086	23.1724	23.0751	NaN	NaN	NaN	NaN	NaN	NaN	NaN	NaN	NaN	NaN	NaN	NaN	NaN	NaN	NaN	NaN	NaN	NaN	NaN	NaN					0	0.621266	0	0		high mobility group protein B4, putative	PBANKA_1135500.1-p1	2	2	10.7	10.7	10.7	29.831	0.0013661	2.282	61736000
25.4582	25.4363	24.8886	25.2395	25.3838	26.4562	25.9729	26.2261	26.2087	26.309	25.6914	25.3422	25.8672	25.6763	25.3908	25.3889	25.0481	25.2368	25.2749	25.6543	25.8455	25.8838	26.3413	26.3464	26.1472	25.3777	24.8889	25.6716	26.0086	25.9693		+			-0.312294	0.640971	-0.262618	0.529624	G_PP1_G_WT	heat shock protein 90, putative	PBANKA_0929900.1-p1	14	14	20.6	20.6	20.6	92.216	0	61.592	1352100000
25.322	24.6089	23.3051	24.3476	25.227	25.7338	26.4356	26.4648	26.4297	26.328	25.6689	25.6303	25.9562	25.7399	25.2305	24.153	25.1057	25.068	26.7482	24.4753	28.0184	29.2091	29.398	29.3066	29.308	26.4095	25.4713	26.3388	26.4842	26.8539	+	+		+	-1.08304	0.633242	-1.20152	2.73649	G_I2_G_WT;G_PP1_G_WT;S_PP1_S_WT	60S ribosomal protein L13-2, putative	PBANKA_1423500.1-p1	12	12	47	47	47	25.418	0	30.238	3687700000
NaN	NaN	NaN	NaN	NaN	NaN	NaN	NaN	NaN	NaN	NaN	NaN	NaN	NaN	NaN	23.7107	23.7915	23.9253	23.6187	23.4635	NaN	NaN	NaN	NaN	NaN	NaN	NaN	NaN	NaN	NaN			+		0	0	1.77895	0	S_I2_S_WT	splicing factor 3B subunit 2, putative	PBANKA_1325300.1-p1	3	3	5.2	5.2	5.2	77.612	0	5.552	113150000
NaN	26.006	NaN	26.3952	26.2914	27.2864	26.9009	27.0065	27.1319	26.8535	26.4358	26.263	26.5904	26.3892	26.3392	25.7893	25.097	26.1435	25.7148	26.2916	25.8678	26.267	26.2005	26.3925	26.3008	25.5787	24.9452	25.8627	26.3355	26.0306	+	+			-1.56468	0.632332	0.0567184	0.455178	G_I2_G_WT;G_PP1_G_WT	ATP synthase F1, alpha subunit, putative	PBANKA_0313800.1-p1	14	14	27.6	27.6	27.6	61.361	0	38.912	2019500000
28.339	28.8123	28.2498	28.3033	28.5906	28.9084	28.8878	28.7028	28.7171	28.6195	28.0631	28.227	28.2035	28.1136	28.0757	28.6611	28.5103	28.45	28.669	28.5792	28.6535	28.5597	29.0024	28.8098	28.7201	28.13	28.0873	28.2874	28.3163	28.5448		+			0.322446	0.630539	0.300729	0.475926	G_PP1_G_WT	ATP-dependent RNA helicase UAP56, putative	PBANKA_0306800.1-p1	16	16	41.4	41.4	41.4	53.03	0	323.31	9240500000
27.9012	28.2199	27.6429	27.9192	28.2285	28.8343	28.674	28.6458	28.5741	28.6023	28.0755	28.031	28.0898	28.1295	27.8987	27.9117	27.4513	27.8389	27.6832	27.6416	28.1972	28.2386	28.4018	28.3494	28.5103	27.9218	27.4999	27.755	27.8921	28.1535		+			-0.0625515	0.621225	-0.139144	0.494983	G_PP1_G_WT	glycerol kinase, putative	PBANKA_1364300.1-p1	20	20	45.1	45.1	45.1	56.555	0	323.31	7105000000
24.5445	24.768	NaN	25.1325	25.0642	24.4997	24.3899	24.0706	24.2034	24.1027	24.4171	NaN	24.63	24.8582	24.9721	NaN	NaN	NaN	NaN	NaN	NaN	NaN	NaN	NaN	NaN	NaN	NaN	NaN	NaN	NaN					-0.00180702	-0.0890614	0	0		conserved Plasmodium protein, unknown function	PBANKA_1029400.1-p1	4	4	9.1	9.1	9.1	40.224	0	76.952	269930000
24.7513	25.0755	24.1356	24.6029	25.4907	26.2503	26.0006	26.6641	26.5002	26.6033	25.6567	25.4609	25.9806	25.9695	25.8642	25.9832	26.3045	25.8994	27.1389	25.4927	26.8209	27.8859	28.0433	27.5483	27.8813	25.8121	25.7994	26.3857	26.3705	25.9956	+	+		+	-0.975164	0.61732	0.0910572	1.56329	G_I2_G_WT;G_PP1_G_WT;S_PP1_S_WT	40S ribosomal protein S7, putative	PBANKA_1401300.1-p1	8	8	38.7	38.7	38.7	22.481	0	184.88	2263600000
NaN	NaN	NaN	NaN	NaN	22.1797	22.4633	22.763	22.1838	22.3677	NaN	NaN	22.4293	22.2929	NaN	NaN	NaN	NaN	NaN	NaN	NaN	NaN	NaN	NaN	NaN	NaN	NaN	NaN	NaN	NaN					-0.0222916	-0.189662	0	0		conserved Plasmodium protein, unknown function	PBANKA_0937900.1-p1	3	3	8.5	8.5	8.5	46.602	0.0084104	1.7305	43200000
NaN	NaN	NaN	NaN	NaN	25.4662	25.2368	25.0495	24.938	25.0537	24.5017	24.4953	24.8104	24.6487	24.2196	NaN	NaN	NaN	NaN	NaN	23.9979	24.4631	24.6116	24.4315	24.3003	24.1904	23.5292	23.7387	24.0641	24.1571	+	+	+		-2.00527	0.613716	-1.79099	0.424965	G_I2_G_WT;G_PP1_G_WT;S_I2_S_WT	V-type proton ATPase subunit H, putative	PBANKA_1405100.1-p1	8	8	21.1	21.1	21.1	53.947	0	18.991	457140000
NaN	NaN	NaN	NaN	NaN	23.9011	24.134	24.0003	24.2531	24.1469	23.4179	23.2724	23.576	23.8038	23.3325	NaN	NaN	NaN	NaN	NaN	NaN	NaN	NaN	NaN	NaN	NaN	NaN	NaN	23.3361	NaN		+			-0.778241	0.606562	0.106585	-0.19567	G_PP1_G_WT	conserved Plasmodium protein, unknown function	PBANKA_0614000.1-p1	4	4	9.6	9.6	9.6	55.71	0	8.9767	165830000
26.0725	26.4909	25.1948	24.8242	25.6061	26.6414	26.8019	26.9729	26.9815	26.9172	26.2099	26.235	26.3148	26.441	26.1326	26.429	25.8355	25.4364	27.1062	25.5582	28.0924	29.1161	29.171	29.0823	29.1405	27.2224	26.4253	27.28	27.0017	27.5536		+		+	-0.62894	0.596342	-1.02357	1.82383	G_PP1_G_WT;S_PP1_S_WT	60S ribosomal protein L18, putative	PBANKA_1354400.1-p1	11	11	56.5	56.5	56.5	21.7	0	85.748	4055700000
24.307	23.9966	23.8877	24.4334	24.281	25.8937	25.6789	25.8304	25.8802	25.7232	25.3351	25.1363	25.3702	25.2228	24.9694	25.0922	25.144	24.5791	25.4733	24.6024	26.7786	27.8972	27.855	27.7296	27.8167	26.2835	25.2001	26.451	26.2607	26.2728	+	+		+	-1.02562	0.594511	-1.11542	1.52181	G_I2_G_WT;G_PP1_G_WT;S_PP1_S_WT	60S ribosomal protein L28, putative	PBANKA_0906500.1-p1	4	4	30.2	30.2	30.2	14.582	0	78.319	1768200000
25.9667	25.6371	25.5378	25.8643	25.6574	27.0781	26.5945	26.8848	26.9685	26.8431	26.4021	26.2142	26.331	26.3599	26.0998	24.7787	25.1674	25.5296	24.9017	25.5049	25.9519	26.0887	26.4053	26.4529	26.4282	25.3277	24.9942	25.9038	25.9093	25.2523		+			-0.548759	0.592392	-0.301009	0.787931	G_PP1_G_WT	vesicle-associated membrane protein, putative	PBANKA_1303700.1-p1	6	6	36.3	36.3	36.3	26.902	0	313.09	1753700000
28.9562	29.1479	28.6154	28.5364	28.6328	28.9866	28.6755	28.8384	28.8038	28.7469	28.2757	28.3189	28.2644	28.1926	28.057	27.2272	27.3995	27.1464	27.3955	27.0667	27.1017	27.0669	27.5129	27.3379	27.0597	26.863	26.9192	26.9362	26.8473	27.4587		+			0.555996	0.588513	0.24216	0.210933	G_PP1_G_WT	DNA replication licensing factor MCM5, putative	PBANKA_0610200.1-p1	29	29	44.2	43.3	43.3	85.547	0	323.31	6953200000
28.9483	28.8999	29.0033	28.5523	29.0366	28.3487	28.103	27.9888	27.8548	28.239	28.6057	28.6611	28.6578	28.6964	28.8711	29.197	28.9267	28.8307	28.9073	29.1835	28.528	27.5881	28.1086	28.1577	27.8154	27.8322	27.8779	27.8518	27.9571	28.9704		+			0.189655	-0.591549	0.911144	-0.0583206	G_PP1_G_WT	phosphoglucomutase, putative	PBANKA_1210900.1-p1	20	20	45.7	45.7	45.7	68.16	0	323.31	8407100000
28.328	28.6863	28.4885	28.4791	29.0555	28.0442	28.3702	28.313	28.3109	28.1626	28.8591	29.0307	28.8044	28.7471	28.7499	28.9496	28.7533	28.7797	28.8382	29.2623	28.3392	27.4007	28.0043	28.0015	27.8543	28.4427	28.4706	28.7126	29.084	29.2522		+			-0.230761	-0.598052	0.124202	-0.872424	G_PP1_G_WT	CCR4-associated factor 16, putative	PBANKA_1010800.1-p1	16	16	66.1	66.1	66.1	29.681	0	323.31	8336400000
26.9367	26.8105	26.5764	26.4217	26.8896	25.4789	25.6562	25.7492	25.2186	25.7794	26.1391	26.2199	26.2934	26.0368	26.2697	27.4284	27.3687	27.3756	27.4507	27.3465	26.6143	25.6486	26.4187	26.2004	26.1085	26.2252	26.4979	26.4209	26.4166	27.2214		+			0.535255	-0.615267	0.837598	-0.358298	G_PP1_G_WT	phenylalanine--tRNA ligase alpha subunit, putative	PBANKA_0203800.1-p1	17	16	35.1	35.1	33.9	65.58	0	67.378	2024200000
25.6562	25.9942	25.6657	25.3672	26.053	25.0418	25.0539	24.9546	24.9952	25.0254	25.6645	25.6935	25.8142	25.492	25.5022	26.0984	25.9014	26.1982	26.3201	25.7452	25.2679	25.2406	25.4626	25.6996	25.3399	25.8821	26.0757	25.8539	25.7988	26.7396		+			0.113968	-0.619124	-0.0173512	-0.667885	G_PP1_G_WT	PUB domain-containing protein, putative	PBANKA_1343900.1-p1	11	11	25.5	25.5	25.5	47.199	0	15.595	1114500000
25.8722	26.1307	25.8585	26.0942	26.3752	24.7081	25.2725	25.1154	24.8449	24.955	25.7468	25.8616	25.5197	25.3664	25.5174	27.6258	27.17	27.1444	27.5756	27.3683	26.9824	26.6773	27.0741	26.5842	27.1174	27.2155	27.3801	27.1493	27.176	27.9518		+			0.463811	-0.623172	0.00228233	-0.487441	G_PP1_G_WT	orotate phosphoribosyltransferase, putative	PBANKA_1112400.1-p1	7	7	31.2	31.2	31.2	29.63	0	36.038	2076100000
25.4131	25.4007	24.8128	24.9197	25.19	24.7981	24.8654	24.8235	24.6302	24.6534	25.3611	25.3204	25.6189	25.141	25.4467	24.3834	24.2246	24.7321	23.8998	24.3033	24.1837	NaN	23.9026	NaN	NaN	24.545	24.7644	24.6352	24.7248	24.3686		+		+	-0.230418	-0.623522	-0.298955	-1.72827	G_PP1_G_WT;S_PP1_S_WT	cytosolic glyoxalase II, putative	PBANKA_1004000.1-p1	6	6	20.9	20.9	20.9	30.362	0	42.086	556280000
24.1911	NaN	NaN	NaN	NaN	23.1739	23.6727	22.7243	23.0036	22.3966	22.8876	23.482	23.6103	24.4248	23.9315	NaN	NaN	NaN	NaN	NaN	NaN	NaN	NaN	NaN	NaN	NaN	NaN	NaN	NaN	NaN					-0.680981	-0.672983	0	0		conserved Plasmodium protein, unknown function	PBANKA_0407300.1-p1	3	3	19.3	19.3	19.3	20.859	0	14.394	98335000
26.7816	26.7842	26.7269	26.2744	26.9588	26.2767	26.4569	26.0689	26.1827	26.1709	26.6524	26.879	26.9188	27.0559	26.7895	27.2695	27.1492	27.2297	26.9823	27.3548	27.0083	26.4043	26.7011	26.6468	26.9558	27.0764	27.0195	27.0045	26.9117	27.314		+			-0.153959	-0.627898	0.131881	-0.321973	G_PP1_G_WT	thioredoxin peroxidase 2, putative	PBANKA_1430800.1-p1	9	9	50.2	50.2	50.2	24.727	0	94.474	2481500000
NaN	NaN	NaN	NaN	NaN	23.8182	23.4748	23.7935	23.6823	23.7777	23.2343	22.975	23.5881	23.7595	23.3629	NaN	NaN	NaN	NaN	NaN	NaN	NaN	NaN	NaN	NaN	NaN	NaN	NaN	NaN	NaN					-0.872477	0.325357	0	0		conserved Plasmodium protein, unknown function	PBANKA_0107200.1-p1	3	3	13.1	13.1	13.1	26.545	0	5.6246	112020000
27.1211	27.6631	26.7033	27.3791	27.0954	28.4089	28.1421	27.7919	28.0544	27.5157	28.5494	28.4711	28.6462	28.9078	28.4947	26.153	25.74	26.5503	26.3652	26.366	27.7747	27.6157	27.9721	27.66	28.0955	28.0028	26.4973	28.2362	28.5109	27.1387	+	+	+		-1.42143	-0.631209	-1.44228	0.146431	G_I2_G_WT;G_PP1_G_WT;S_I2_S_WT	DNA/RNA-binding protein Alba 3, putative	PBANKA_1204400.1-p1	8	8	69.2	69.2	69.2	11.991	0	116.03	5248600000
25.4384	25.2112	24.8515	25.0393	25.2087	25.3821	25.3976	24.9961	24.6875	24.8297	25.6582	25.5677	25.5818	25.7994	25.8909	26.0444	26.3823	27.5415	25.915	26.1685	26.5445	25.381	25.5531	25.8485	25.7343	25.9831	NaN	26.0908	26.4663	26.0814		+			-0.549811	-0.641008	1.19396	0.595871	G_PP1_G_WT	actin-depolymerizing factor 1	PBANKA_1103100.1-p1	3	3	35.2	35.2	35.2	13.964	0	82.31	1217600000
24.9946	25.3822	24.5129	24.5668	25.59	25.4544	25.2961	24.8405	25.2132	25.0051	25.8368	25.8338	25.7129	25.5787	26.0781	26.7526	26.4622	26.4876	26.7593	26.6814	26.6393	26.0685	26.4822	26.5264	26.4726	26.4758	26.5031	26.7671	26.8452	27.1206		+			-0.79876	-0.646201	-0.11375	-0.304561	G_PP1_G_WT	glutamine-dependent NAD(+) synthetase, putative	PBANKA_0827500.1-p1	15	15	22.3	22.3	22.3	101.53	0	76.37	1455700000
29.5347	29.7406	30.1664	29.6086	29.764	28.5398	28.0027	28.5399	28.7371	29.0394	29.4763	29.3048	29.1341	28.9858	29.1983	31.1532	31.2591	31.1894	31.3012	30.9166	30.894	30.4958	30.8451	30.7571	30.6679	30.0792	29.9906	30.1344	30.0752	30.901		+			0.543008	-0.648082	0.927783	0.495898	G_PP1_G_WT	40S ribosomal protein S2, putative	PBANKA_0510900.1-p1	16	16	61.2	61.2	61.2	29.744	0	323.31	26037000000
28.7907	28.8009	29.006	28.8346	29.202	28.2957	28.088	28.4382	28.2816	28.3408	28.9392	29.0822	28.9163	28.7725	28.9754	28.6727	28.5535	28.9207	28.5755	29.2527	27.5179	26.2672	27.1885	26.8778	26.2014	27.0622	26.4024	27.3695	27.5168	28.3479		+	+		-0.0102654	-0.648264	1.45528	-0.529193	G_PP1_G_WT;S_I2_S_WT	inosine-5-monophosphate dehydrogenase, putative	PBANKA_0821700.1-p1	15	15	36.3	36.3	36.3	55.898	0	97.547	7503500000
28.8869	28.8864	28.7346	28.6319	29.2662	28.9807	29.0227	28.9219	28.9433	28.827	29.5985	29.7391	29.5945	29.5986	29.4362	28.5666	28.4538	28.8416	28.6762	28.7239	28.6867	28.3	28.8094	28.6926	28.5334	28.7297	28.6019	28.7864	29.0133	29.4979		+			-0.712213	-0.65429	-0.273414	-0.321425	G_PP1_G_WT	T-complex protein 1 subunit delta, putative	PBANKA_1134100.1-p1	22	22	46.3	46.3	46.3	57.938	0	323.31	11340000000
25.096	24.3416	NaN	NaN	24.3994	26.6869	26.0697	25.8549	26.1593	25.9742	26.4751	26.4953	27.0059	27.2577	26.8357	NaN	NaN	24.7555	25.9345	24.771	25.7862	25.4584	25.134	25.8573	25.8989	25.9935	NaN	26.4416	26.8323	24.1806	+	+			-2.70118	-0.664991	-0.903766	0.635782	G_I2_G_WT;G_PP1_G_WT	thioredoxin, putative	PBANKA_0942500.1-p1	10	10	27.4	27.4	27.4	49.066	0	123.94	1258100000
25.7887	25.6201	25.6229	25.3079	26.0535	25.1877	25.1036	24.9898	25.0749	25.319	25.9567	25.8439	25.8289	25.6157	25.78	25.9572	25.7204	25.8145	25.9431	25.6501	25.4555	24.6466	24.9393	24.4596	24.3288	NaN	24.4401	25.1718	24.9936	25.8221		+			-0.126433	-0.670047	1.26781	0.216722	G_PP1_G_WT	phosducin-like protein, putative	PBANKA_1204800.1-p1	6	6	32.6	32.6	32.6	22.938	0	82.003	931750000
NaN	NaN	NaN	NaN	NaN	24.8304	23.9419	24.1312	24.695	24.1577	24.0332	24.0159	23.9852	24.001	23.7645	NaN	NaN	NaN	NaN	NaN	NaN	NaN	NaN	NaN	NaN	NaN	NaN	NaN	NaN	NaN	+				-1.3703	0.391273	0	0	G_I2_G_WT	inner membrane complex suture component, putative	PBANKA_1013000.1-p1	4	4	6.4	6.4	6.4	87.155	0	10.948	180680000
24.9788	24.9647	24.5942	NaN	24.9893	24.2426	24.2878	23.8617	24.2942	23.9839	24.8166	24.8708	24.4367	24.962	24.9486	23.8966	24.003	23.7562	23.7337	23.791	NaN	NaN	23.1504	NaN	NaN	24.0066	NaN	23.6809	23.6178	NaN		+		+	-0.341726	-0.672882	0.531239	-1.27573	G_PP1_G_WT;S_PP1_S_WT	ribonuclease H2 subunit A, putative	PBANKA_1122800.1-p1	6	6	27.4	27.4	27.4	33.284	0	14.052	367020000
27.2128	27.5336	27.6216	26.9499	27.4919	26.5404	26.6471	26.6231	26.4411	26.8159	27.3345	27.4433	27.3352	27.1082	27.2735	28.2205	28.0017	28.1806	28.2266	28.1904	27.6129	26.7966	27.5692	27.4874	27.2655	27.411	27.3327	27.454	27.5347	28.2641		+			0.0630238	-0.685406	0.564664	-0.252953	G_PP1_G_WT	phenylalanine--tRNA ligase beta subunit, putative	PBANKA_0942900.1-p1	23	23	42.6	42.6	42.6	72.639	0	182.78	3906100000
28.5355	28.6317	28.1845	28.307	28.7865	27.4393	27.2332	27.1138	27.2182	27.2628	27.7696	28.1117	28.1586	27.791	27.8992	29.0518	29.0237	29.1177	28.7683	28.9884	27.9707	27.2415	27.8332	27.5584	27.3744	27.3899	27.5482	27.5787	27.9115	28.6113		+			0.543028	-0.692584	1.18207	-0.212278	G_PP1_G_WT	peptidyl-prolyl cis-trans isomerase FKBP35, putative	PBANKA_1460400.1-p1	20	20	55.2	55.2	55.2	35.023	0	201.1	6017400000
23.8263	25.0739	23.5169	23.3419	24.8427	23.2383	22.933	23.139	23.4191	23.2804	23.7403	23.7913	23.9779	23.6779	24.2894	26.5899	25.5907	26.6228	25.8005	27.1233	23.9078	NaN	23.7632	23.3264	23.2194	NaN	NaN	NaN	24.5568	25.4763		+	+		0.224983	-0.693401	2.94359	0.016058	G_PP1_G_WT;S_I2_S_WT	U2 small nuclear ribonucleoprotein A, putative	PBANKA_1145700.1-p1	7	7	48	48	48	20.463	0	31.189	604660000
27.2599	27.3417	27.1214	26.896	27.1134	26.2968	26.1704	25.9911	25.9645	26.041	26.7582	26.9909	26.7501	26.8514	26.6327	26.9203	26.7724	26.859	26.7689	27.0847	26.215	25.6073	25.8801	26.1162	25.9138	26.1167	25.8977	26.3636	26.2062	26.5077		+			0.349812	-0.703897	0.662691	-0.271857	G_PP1_G_WT	bifunctional dihydrofolate reductase-thymidylate synthase, putati	PBANKA_0719300.1-p1	16	16	35.6	35.6	35.6	68.883	0	206.94	2016300000
28.1828	28.2827	28.3278	27.944	28.6994	27.5881	27.418	27.2754	27.189	27.3187	27.8861	28.1165	28.2367	27.9449	28.1322	26.8387	26.7976	27.129	27.0055	26.6339	26.5813	25.1278	25.9649	25.7066	25.4644	26.3167	26.0024	26.3829	26.3707	27.2934		+			0.224067	-0.705396	0.407716	-0.704235	G_PP1_G_WT	tubulin-specific chaperone a, putative	PBANKA_0204200.1-p1	8	8	48.5	48.5	48.5	19.165	0	305.2	3690200000
27.9612	27.9158	27.9284	27.8913	28.1527	27.8875	27.5921	27.4204	27.576	27.5454	28.2874	28.2443	28.4413	28.3747	28.2042	27.8831	27.7916	27.8684	27.697	28.2646	27.8992	27.198	27.5472	27.6894	27.8337	28.1022	27.2054	28.0333	28.1857	27.946		+			-0.340503	-0.706119	0.00644684	-0.261002	G_PP1_G_WT	ATP-dependent 6-phosphofructokinase, putative	PBANKA_0816400.1-p1	40	40	38.6	38.6	38.6	146.76	0	322.13	5240100000
NaN	NaN	NaN	NaN	NaN	24.5324	24.1684	24.1703	24.562	24.3791	24.6477	24.7227	25.2114	25.0579	24.7641	NaN	NaN	NaN	NaN	NaN	NaN	NaN	NaN	NaN	NaN	NaN	NaN	NaN	NaN	NaN	+				-1.84977	-0.518307	0	0	G_I2_G_WT	conserved Plasmodium protein, unknown function	PBANKA_1105300.1-p1	7	7	13.2	13.2	13.2	55.056	0	9.8572	235170000
NaN	NaN	NaN	NaN	NaN	24.1836	24.0973	23.8184	23.8424	23.7355	24.1472	24.0938	24.2712	24.335	24.2002	NaN	NaN	NaN	NaN	NaN	NaN	NaN	NaN	NaN	NaN	NaN	NaN	NaN	NaN	NaN	+				-1.85882	-0.274023	0	0	G_I2_G_WT	conserved Plasmodium protein, unknown function	PBANKA_1217900.1-p1	2	2	19.7	19.7	19.7	16.053	0.0018002	2.1909	160760000
NaN	NaN	NaN	NaN	24.5292	25.7628	25.4227	25.457	25.5309	25.4218	25.0485	24.8174	25.7825	25.6529	25.1594	NaN	NaN	NaN	NaN	NaN	NaN	NaN	NaN	NaN	NaN	NaN	NaN	NaN	NaN	NaN	+				-2.08014	0.226887	0	0	G_I2_G_WT	conserved Plasmodium protein, unknown function	PBANKA_1037900.1-p1	6	6	55.5	55.5	55.5	18.11	0	89.551	429130000
28.8863	28.8999	28.5243	28.5785	29.1569	29.0777	29.0716	28.9182	28.9366	28.943	29.6925	29.8544	29.7765	29.6766	29.4801	28.6152	28.3887	28.5704	28.4979	28.7489	28.48	28.3668	28.7053	28.7447	28.6987	28.9155	28.5687	28.8199	28.9905	29.4876	+	+			-0.886835	-0.706595	-0.392216	-0.357339	G_I2_G_WT;G_PP1_G_WT	T-complex protein 1 subunit alpha, putative	PBANKA_0916200.1-p1	30	30	60	60	60	60.134	0	323.31	11352000000
NaN	25.1388	24.82	25.2459	25.0706	25.0034	25.1439	24.7703	25.0004	24.6226	25.6385	25.5718	25.4906	25.8983	25.5024	24.451	24.6831	24.7211	24.51	25.4307	24.94	24.5303	24.5766	24.6164	24.8668	25.4223	24.0298	25.6973	26.0383	25.1049	+	+			-1.12006	-0.712204	-0.499335	-0.552481	G_I2_G_WT;G_PP1_G_WT	proteasome subunit alpha type-1, putative	PBANKA_1301400.1-p1	6	6	34.8	34.8	34.8	28.894	0	24.153	710210000
NaN	NaN	NaN	NaN	NaN	24.4223	24.1798	24.3193	24.2672	24.0504	24.1362	24.2182	24.822	24.8587	24.5172	NaN	NaN	NaN	NaN	NaN	NaN	NaN	NaN	NaN	NaN	NaN	NaN	NaN	NaN	NaN	+				-2.4292	-0.262647	0	0	G_I2_G_WT	6-cysteine protein	PBANKA_1359600.1-p1	4	4	13	13	13	52.906	0	75.799	192630000
28.8143	29.1007	28.8367	28.5749	28.9131	28.6959	28.5603	28.6587	28.6045	28.5497	28.7595	28.7737	28.7673	28.6462	28.5598	27.3662	27.3062	27.1472	27.5796	27.2171	27.3948	27.1786	27.5869	27.5186	27.3426	27.3067	27.3333	27.3035	27.199	27.9063					0.14663	-0.087495	-0.0865051	-0.00545425		DNA replication licensing factor MCM3, putative	PBANKA_1241800.1-p1	34	34	42	42	42	107.3	0	323.31	6910200000
28.7798	28.7135	28.1551	28.2764	29.1114	29.03	29.0231	28.9743	28.8927	28.8326	29.3744	29.4299	29.4387	29.2182	29.2178	28.204	27.8922	28.3053	28.2645	28.3179	28.1973	28.3419	28.5599	28.5663	28.4672	28.3039	27.9978	28.4435	28.406	29.0561					-0.728557	-0.385254	-0.244696	-0.014946		T-complex protein 1 subunit gamma, putative	PBANKA_1444100.1-p1	24	24	45.2	45.2	45.2	60.835	0	149.46	9641500000
25.8422	25.652	25.8786	25.5866	25.1864	25.2679	25.4117	25.2807	25.3853	25.4485	25.7805	25.6381	25.8818	26.1033	25.9663	25.531	25.8765	26.3599	26.157	26.307	25.7231	25.3691	25.6658	25.4981	25.7418	25.6561	25.2046	25.5845	26.004	25.6251					-0.244856	-0.515195	0.431441	-0.0152683		glutamine synthetase, putative	PBANKA_0823500.1-p1	11	11	28.8	28.8	28.8	64.271	0	56.989	1154900000
25.7256	24.7714	25.6517	24.8618	25.551	23.5816	24.0428	23.7123	24.2372	23.6218	23.4143	23.3372	23.3112	23.5486	23.3439	NaN	23.0179	22.9097	NaN	23.1388	NaN	21.6712	22.2945	NaN	NaN	NaN	NaN	NaN	NaN	NaN	+				1.92125	0.448088	0.301769	-0.0180096	G_I2_G_WT	conserved Plasmodium protein, unknown function	PBANKA_1205300.1-p1	3	3	33	33	33	12.842	0	22.52	278730000
26.0662	26.0572	25.7275	25.2502	26.3525	25.5477	25.1862	25.7738	25.6266	25.6458	25.7688	25.9311	25.6267	25.6353	25.8293	26.2125	26.1687	26.2317	26.4261	26.3529	25.6161	25.3257	25.905	25.929	25.9919	25.3962	25.3794	25.8627	25.9426	26.2777					0.132481	-0.202191	0.506668	-0.0181496		protein transport protein Sec24A, putative	PBANKA_1137200.1-p1	13	13	24.7	24.7	24.7	106.43	0	75.935	1287500000
28.4291	28.4295	28.0379	28.1472	28.3435	29.2849	28.9703	29.0087	29.0491	29.0163	28.6395	28.6737	28.8144	28.919	28.5785	28.1594	27.8494	28.2553	28.2644	28.5507	28.6557	28.4422	28.9159	28.9797	28.9578	28.8332	28.3776	28.8824	29.1011	28.8485					-0.447593	0.340834	-0.59274	-0.0183083		karyopherin beta, putative	PBANKA_1238800.1-p1	37	37	40.1	40.1	40.1	127.82	0	323.31	10122000000
NaN	NaN	NaN	NaN	NaN	23.3406	22.9553	22.6656	23.1013	22.6005	22.8555	22.3737	22.5441	22.4082	22.7774	NaN	NaN	NaN	NaN	NaN	22.8997	22.8582	23.2457	22.6873	22.7183	23.0552	22.9764	22.7023	22.7437	23.0689					-0.152998	0.340854	0.0847401	-0.0274494		conserved Plasmodium protein, unknown function	PBANKA_0105300.1-p1	8	8	5.7	5.7	5.7	208.2	0	7.5932	135840000
29.3065	29.1074	29.1379	28.9858	29.6632	29.2125	29.1041	29.0097	29.0783	28.9192	29.8766	29.9859	29.8342	29.5905	29.5979	29.224	28.9749	29.1756	29.0291	29.1745	28.7205	28.4354	28.8727	28.8472	28.6539	28.8736	28.5758	28.8033	28.9252	29.5596		+			-0.536852	-0.712254	0.168129	-0.241537	G_PP1_G_WT	T-complex protein 1 subunit theta, putative	PBANKA_0310900.1-p1	31	31	59.9	59.9	59.9	60.808	0	323.31	12922000000
25.7388	25.1137	NaN	24.6658	25.3514	25.0601	25.1957	25.3271	24.6837	25.2148	24.709	24.8385	25.1551	25.1305	25.3084	23.7158	NaN	24.1472	NaN	NaN	23.0942	23.6017	23.0213	23.1465	NaN	22.9859	NaN	22.9877	23.4541	23.1756					-0.343616	0.0679604	0.155222	-0.0427639		ubiquitin regulatory protein, putative	PBANKA_1222400.1-p1	5	5	27.2	27.2	27.2	27.641	0	124.4	503620000
NaN	NaN	NaN	NaN	NaN	NaN	NaN	NaN	NaN	NaN	NaN	NaN	22.3032	NaN	NaN	24.9773	24.7216	25.2476	24.4039	25.1637	24.3313	22.949	23.0767	23.1387	23.7548	23.8184	22.5327	23.8068	24.2724	23.0418			+		0.473731	-0.0657959	1.40841	-0.0443436	S_I2_S_WT	conserved Plasmodium protein, unknown function	PBANKA_0519100.1-p1	3	3	8.2	8.2	8.2	31.787	0	5.635	205520000
24.937	25.815	25.4509	24.8267	25.0868	25.1984	25.2709	24.9668	25.0689	24.9184	24.3671	25.2427	25.1223	25.0914	24.9888	26.5098	26.7021	26.1976	26.4723	26.2262	26.0822	25.6394	26.1366	25.9568	25.7908	25.7457	25.9382	25.7859	25.9857	26.3888					0.260844	0.122266	0.452756	-0.0476925		prodrug activation and resistance esterase, putative	PBANKA_1220300.1-p1	12	12	32.4	32.4	32.4	43.394	0	51.625	1141900000
NaN	NaN	NaN	NaN	25.7938	24.2546	23.6832	24.0902	23.8761	NaN	23.7968	23.3672	24.6382	23.8844	23.6508	24.5182	23.798	NaN	24.338	24.3748	NaN	NaN	NaN	NaN	NaN	NaN	NaN	NaN	NaN	22.5299			+		-0.476034	-0.210191	1.59426	-0.0526264	S_I2_S_WT	ribonuclease H2 subunit B, putative	PBANKA_1009700.1-p1	7	7	19	19	19	41.817	0	11.634	241790000
27.2789	27.3217	26.8046	26.8463	27.095	26.0575	26.3401	26.0448	26.0179	26.249	26.8691	26.8787	26.8983	26.917	26.7167	28.3528	28.0439	27.7503	28.0195	27.7939	27.4791	26.5633	27.3353	27.1976	26.832	27.7523	27.3733	27.5417	27.3577	28.292		+			0.213345	-0.714111	0.328683	-0.58198	G_PP1_G_WT	glycine--tRNA ligase, putative	PBANKA_1022800.1-p1	23	23	33.3	33.3	33.3	95.04	0	276.79	3241000000
30.0673	30.2257	30.4044	30.0807	30.401	29.8434	29.7967	29.5512	29.6874	29.6131	30.3459	30.32	30.4442	30.6221	30.3984	29.5649	29.391	29.5272	29.4325	29.875	28.9855	28.2893	28.6541	28.7562	28.5613	28.6613	28.0663	28.7782	29.0231	29.4029		+			-0.190311	-0.727745	0.771749	-0.137111	G_PP1_G_WT	chromatin assembly factor 1 protein WD40 domain, putative	PBANKA_0203000.1-p1	23	23	71.3	71.3	71.3	50.531	0	323.31	18224000000
27.2461	27.1598	27.229	27.5386	27.2582	26.4941	26.5881	26.72	26.3336	26.5077	27.194	27.3131	27.1291	27.3495	27.3002	26.8837	26.8104	26.6583	26.7363	26.8075	26.646	25.9173	26.3929	26.3829	26.3949	26.753	26.9754	27.3338	27.4174	27.4045		+			0.0291451	-0.728501	-0.397605	-0.830066	G_PP1_G_WT	dipeptidyl aminopeptidase 1, putative	PBANKA_0931300.1-p1	18	18	37	37	37	78.695	0	104.95	2556900000
27.951	27.3408	27.3562	27.035	27.6898	27.5595	27.6555	27.3871	27.5004	27.1674	27.8189	27.6921	27.8537	28.1334	28.0043	27.5683	26.9916	27.6995	27.2079	27.4924	28.5075	27.514	27.7251	27.7889	27.9374	27.8494	27.2677	28.2933	28.8637	27.5128					-0.425943	-0.446502	-0.565466	-0.0628117		exported protein IBIS1	PBANKA_1365500.1-p1	11	11	36.7	36.7	36.7	37.407	0	323.31	4541500000
27.8079	28.3531	27.698	27.5114	28.2641	29.5703	29.0529	29.4166	29.2659	29.1278	29.4519	29.2568	29.1948	28.5996	28.4233	29.3553	29.4113	29.3839	30.1703	29.4973	30.3323	30.5761	30.8008	30.9125	30.9724	30.8758	31.1117	30.94	30.6275	30.3639	+		+		-1.05838	0.301445	-1.22013	-0.0649498	G_I2_G_WT;S_I2_S_WT	high molecular weight rhoptry protein 2	PBANKA_0830200.1-p1	54	54	42.2	42.2	42.2	160.02	0	323.31	20657000000
NaN	25.291	25.4056	25.3084	26.5219	25.6969	25.4291	25.0809	25.2312	25.0867	26.0454	26.095	26.1896	25.9427	25.8967	25.2114	25.3479	25.858	25.8586	25.6014	24.0742	24.4656	24.7733	24.5254	24.6365	24.2342	23.8089	NaN	24.6271	24.9122		+	+		-0.927198	-0.72892	1.66143	0.580966	G_PP1_G_WT;S_I2_S_WT	protein SIS1, putative	PBANKA_0310000.1-p1	14	14	50.9	50.9	50.9	38.121	0	44.887	885840000
26.1336	25.2114	25.2149	25.1876	25.7578	25.8211	25.4608	25.1561	25.4069	25.3741	25.991	25.7171	26.5131	26.3916	26.2944	25.8923	25.2666	26.0565	25.0739	26.1935	24.8866	NaN	25.06	NaN	24.0361	24.7889	NaN	25.3134	26.0814	25.2192		+			-0.680398	-0.737652	0.976801	-1.28311	G_PP1_G_WT	proliferation-associated protein 2g4, putative	PBANKA_1016300.1-p1	12	12	35.5	35.5	35.5	42.764	0	23.066	989070000
30.6998	30.6985	30.138	30.5321	31.0538	29.7314	29.8723	29.6046	29.6777	29.7703	30.334	30.4666	30.6828	30.4314	30.4902	30.4214	30.7098	30.6702	30.2082	30.4558	29.6666	29.361	29.4224	29.6182	29.7934	29.3764	29.2451	29.4676	29.7019	29.8958		+			0.143442	-0.749734	0.955707	0.0349678	G_PP1_G_WT	thioredoxin peroxidase 1	PBANKA_1302800.1-p1	14	14	70.8	70.8	70.8	21.654	0	323.31	25146000000
27.2133	26.9067	26.5761	26.4624	27.0482	27.2816	26.8171	27.0604	27.0223	26.8421	26.5134	26.7192	26.5853	26.1653	26.3384	27.3259	27.4633	27.3405	27.4668	26.8761	26.9336	26.6534	27.1738	27.0423	26.8333	26.8668	26.8695	26.9546	26.7781	27.5702					0.377013	0.540391	0.286664	-0.0805752		RNA-binding protein, putative	PBANKA_0103900.1-p1	18	18	30.7	30.7	30.7	82.056	0	192.62	2953400000
27.6	27.877	27.5554	27.3161	27.9066	27.4003	27.2468	27.2507	27.1411	27.0984	28.0815	28.1669	28.0404	27.7634	27.8692	28.3418	28.1803	28.306	28.3016	28.6787	28.0764	27.8784	28.0688	28.0691	28.1354	28.1384	28.0536	28.2006	28.1813	28.5823		+			-0.333245	-0.756803	0.130438	-0.185624	G_PP1_G_WT	nicotinate phosphoribosyltransferase, putative	PBANKA_1127700.1-p1	20	20	33.1	33.1	33.1	79.516	0	323.31	5435500000
24.7804	NaN	NaN	NaN	24.2505	24.9914	25.0215	24.5963	25.0752	24.7329	25.0421	25.3332	25.5185	25.5917	25.498	NaN	NaN	NaN	NaN	23.203	24.0351	23.7211	23.3807	24.4608	24.3745	24.7855	NaN	24.4615	25.2205	NaN	+		+		-2.00295	-0.513234	-1.81164	-0.0904919	G_I2_G_WT;S_I2_S_WT	isocitrate dehydrogenase [NADP], mitochondrial, putative	PBANKA_1358600.1-p1	10	9	25.6	25.6	23.2	53.74	0	20.28	486050000
24.3964	24.5185	22.9735	23.7557	25.2437	23.3704	23.2532	23.843	23.4689	23.538	24.2155	23.4382	23.855	23.5433	23.0406	25.6131	24.6822	24.8643	25.6125	24.8294	23.8794	24.0742	23.7992	23.9631	23.6731	23.9531	23.8465	24.2313	23.9952	23.8163					0.559044	-0.123838	1.15185	-0.0906631		conserved Plasmodium protein, unknown function	PBANKA_0519900.1-p1	12	12	10.2	10.2	10.2	180.33	0	36.841	399220000
24.7005	24.3162	NaN	NaN	24.3159	22.9875	22.6819	NaN	NaN	22.4622	23.402	23.2736	22.8796	22.7247	23.1565	25.4596	25.6912	25.1892	25.7104	24.7967	26.1285	25.9434	26.1233	25.9962	25.5444	24.7818	26.112	25.6805	24.5818	26.2503		+			0.266113	-0.764498	-0.111834	0.465901	G_PP1_G_WT	RNA-binding protein, putative	PBANKA_0213000.1-p1	5	5	12.5	12.5	12.5	62.098	0	89.601	638290000
24.8743	25.0458	24.4318	NaN	24.4965	24.4035	23.8072	24.3942	24.1472	24.1038	24.1443	24.0469	24.2668	24.2937	23.9813	25.0254	25.0686	24.9859	25.0254	24.7173	24.6927	24.4449	24.547	25.0028	24.3863	24.6476	24.9843	24.2731	24.6628	24.9785					0.334758	0.0245995	0.255262	-0.0945152		ankyrin-repeat protein, putative	PBANKA_1459000.1-p1	8	8	37.2	37.2	37.2	34.725	0	62.892	476850000
26.3502	25.9569	26.0444	26.1331	26.1832	26.2397	26.3038	26.1486	26.1599	26	26.5159	26.4714	26.8681	26.5231	26.7028	26.2108	26.2835	26.5986	26.2264	26.7505	25.412	24.1227	25.8288	25.7329	25.3567	24.3712	25.449	24.9612	25.7821	26.3634					-0.482665	-0.445827	1.02855	-0.0947689		isoleucine--tRNA ligase, putative	PBANKA_1347700.1-p1	21	21	19.2	19.2	19.2	151.13	0	60.637	1639100000
NaN	NaN	NaN	NaN	NaN	24.8752	24.0722	23.5299	24.4849	24.425	24.9442	24.6975	25.2532	25.3208	25.026	NaN	NaN	NaN	NaN	NaN	NaN	23.8492	23.1817	24.0641	23.7878	24.2204	22.1236	24.4532	24.7759	22.7621	+	+			-2.46598	-0.770895	-1.42499	-0.259737	G_I2_G_WT;G_PP1_G_WT	conserved protein, unknown function	PBANKA_1452300.1-p1	3	3	13.3	13.3	13.3	23.993	0	11.161	336170000
26.5451	26.7744	26.2833	25.7901	26.2931	26.0881	26.2779	25.6816	25.6638	26.1	25.4478	25.65	25.6501	25.3114	25.259	25.6351	25.5345	25.5852	25.847	24.8975	25.7721	25.1865	25.5889	25.415	25.2122	25.4269	25.6124	25.3786	25.0305	26.2047	+				0.873568	0.498642	-0.0307613	-0.0957024	G_I2_G_WT	biotin--protein ligase 2	PBANKA_1323600.1-p1	8	8	40.5	40.5	40.5	34.748	0	99.52	1210500000
27.4117	26.8478	26.7516	26.8252	27.5052	26.967	27.0056	26.953	26.9173	26.6736	27.3576	27.7064	27.4583	27.9593	27.906	27.1627	26.4696	27.1435	26.7419	27.2075	27.1247	26.5879	26.7451	26.848	26.7889	27.0207	26.1876	27.4074	27.9469	27.3747		+			-0.609229	-0.774228	-0.242419	-0.368505	G_PP1_G_WT	HSP90 co-chaperone p23, putative	PBANKA_1317400.1-p1	6	6	26.3	26.3	26.3	28.116	0	128.24	3041600000
NaN	23.5846	NaN	NaN	NaN	24.2686	23.8544	23.5657	23.8445	23.8628	24.0363	24.1185	24.4289	24.4616	24.1778	NaN	NaN	23.9503	NaN	23.8474	24.2069	23.9406	23.8802	24.0023	23.9959	23.9438	23.8566	24.3763	24.4119	23.954	+				-1.2035	-0.365455	-1.2373	-0.103358	G_I2_G_WT	eukaryotic translation initiation factor 3 subunit E, putative	PBANKA_1242800.1-p1	6	6	14.2	14.2	14.2	62.559	0	57.697	289300000
27.2934	27.2425	27.4313	27.389	27.7509	26.9067	26.8707	26.8858	26.9007	26.8779	27.2524	27.3903	27.2975	27.0491	27.1626	27.2791	27.11	27.3458	27.1802	27.4814	26.3796	26.0314	26.4485	26.313	26.1752	26.1325	26.0255	26.3825	26.4652	26.8615					0.191032	-0.342039	0.905867	-0.103907		glutamine--tRNA ligase, putative	PBANKA_1346600.1-p1	22	22	35.7	35.7	35.7	100.88	0	323.31	2805900000
NaN	NaN	NaN	NaN	NaN	23.3709	23.1623	22.995	23.1876	23.6445	23.2935	23.0581	22.9993	23.1151	22.6967	NaN	NaN	NaN	NaN	NaN	NaN	NaN	23.1086	23.1803	23.0142	22.6033	22.7616	22.5304	22.6566	22.804					-0.217765	0.239529	-0.713742	-0.108509		exportin-T, putative	PBANKA_1414400.1-p1	5	5	5.6	5.6	5.6	136.68	0	19.717	155060000
26.5629	26.7841	26.4588	25.8819	26.6382	26.2117	25.922	25.7264	25.8179	25.745	26.1821	26.3983	26.0397	26.0178	25.9798	27.9935	27.9437	27.6834	27.9853	27.2674	28.1024	27.8254	28.0672	27.9668	27.8806	28.0506	28.0501	27.9826	27.817	28.4994					0.341639	-0.238923	-0.305305	-0.111506		memo-like protein	PBANKA_0719600.1-p1	14	14	56.8	56.8	56.8	34.24	0	178.49	3462700000
23.5034	23.5546	24.794	NaN	24.1428	25.8823	25.5497	24.7983	24.7977	24.4522	26.2034	26.0258	25.9353	25.7072	25.4824	28.0139	27.0255	27.4293	27.5243	27.8442	28.1768	27.0337	27.6172	27.6046	27.8453	27.8681	26.8919	28.0872	28.7852	27.2975	+	+			-1.98648	-0.774773	-0.218543	-0.130466	G_I2_G_WT;G_PP1_G_WT	merozoite surface protein 9, putative	PBANKA_1443300.1-p1	25	25	47.1	47.1	47.1	69.609	0	323.31	2607300000
28.2124	28.2993	28.2303	28.1633	28.674	28.1743	27.77	27.8833	27.7698	27.6291	28.1545	28.2337	27.7913	27.4452	27.8539	28.3756	28.2814	28.6434	27.9835	28.6015	27.7196	26.0456	27.3997	26.9555	26.5284	26.2082	26.3687	27.4782	27.0941	28.0855					0.420127	-0.0504543	1.33014	-0.117167		1-cys peroxiredoxin, putative	PBANKA_1228000.1-p1	11	11	53.2	53.2	53.2	25.394	0	109.86	5450500000
NaN	NaN	NaN	NaN	NaN	22.8749	22.7458	NaN	22.9235	22.9067	22.9796	23.1887	23.1122	22.5905	23.0484	NaN	NaN	NaN	NaN	NaN	23.4173	NaN	23.4303	23.1428	23.0215	23.2748	22.9453	22.8373	22.7252	23.77					-0.338388	-0.306317	-0.622144	-0.121688		ubiquitin fusion degradation protein 1, putative	PBANKA_1239600.1-p1	6	6	10.1	10.1	10.1	80.194	0	10.193	207730000
NaN	NaN	NaN	NaN	NaN	22.5265	23.5539	23.4107	23.0099	23.4432	23.7091	23.6182	23.4911	23.9739	23.6823	NaN	NaN	NaN	NaN	NaN	24.3057	25.6327	25.5729	24.3296	25.6869	26.2633	26.7436	24.2836	24.3317	24.5392	+		+		-1.61721	-0.506074	-2.63947	-0.126698	G_I2_G_WT;S_I2_S_WT	serine esterase, putative	PBANKA_0931900.1-p1	1	1	1	1	1	169.03	0.0094728	1.6197	351080000
29.4378	29.5194	29.1158	29.0799	29.5839	28.7241	28.6445	28.6004	28.5173	28.5483	28.6385	28.7961	28.7284	28.5485	28.7033	29.9068	29.6494	29.6288	29.7945	29.507	29.632	29.0464	29.5673	29.4042	29.3686	29.4287	29.4731	29.3374	29.3279	30.0963					0.664397	-0.0760319	0.164593	-0.128971		leucine--tRNA ligase, putative	PBANKA_1121700.1-p1	54	54	43.9	43.9	43.9	146.88	0	323.31	13536000000
NaN	NaN	NaN	NaN	NaN	24.4946	23.7692	24.0336	24.0365	23.9371	23.9998	23.9163	23.9617	24.5284	24.1308	NaN	NaN	NaN	NaN	NaN	NaN	NaN	NaN	NaN	NaN	NaN	NaN	NaN	23.8184	NaN	+				-1.50607	-0.0532036	0.0862164	-0.12926	G_I2_G_WT	phospholipid scramblase, putative	PBANKA_0506900.1-p1	5	5	14.6	14.6	14.6	50.31	0	36.326	207950000
25.2949	25.1319	25.3356	25.3588	25.316	25.4853	24.8378	25.1637	25.2892	25.1381	26.0226	25.77	25.9212	25.9888	26.0987	25.446	25.396	25.806	25.6744	25.9007	25.5804	25.4507	25.7847	25.7514	25.8563	25.7304	24.1598	25.7585	25.9076	25.4141		+			-0.67281	-0.777431	0.250541	0.290604	G_PP1_G_WT	transcription factor BTF3, putative	PBANKA_1018500.1-p1	5	5	36.2	36.2	36.2	19.936	0	32.857	1046900000
28.8532	29.0009	28.7379	28.7739	29.1619	29.0976	28.9564	28.8347	28.8698	28.7361	29.661	29.8162	29.6607	29.7289	29.5331	28.6726	28.3711	28.467	28.4607	28.9102	28.6192	28.3865	28.668	28.7752	28.6432	28.9789	28.6565	28.9334	29.0463	29.5448	+	+			-0.774434	-0.781081	-0.455684	-0.413577	G_I2_G_WT;G_PP1_G_WT	T-complex protein 1 subunit beta, putative	PBANKA_0405200.1-p1	25	25	52.5	52.5	52.5	59.088	0	323.31	11218000000
26.6946	27.0388	26.9022	26.1517	26.6195	26.3332	26.3872	26.1988	26.1324	26.3354	26.259	26.5571	26.5641	26.1239	26.0333	27.4524	27.5151	27.407	27.8617	27.1	27.6784	27.5603	27.7904	27.6181	27.6036	27.6166	27.8691	27.8095	27.4254	28.1869					0.373857	-0.0300755	-0.314273	-0.131344		splicing factor 3B subunit 3, putative	PBANKA_1449400.1-p1	29	29	27.9	27.9	27.9	138.34	0	323.31	3059200000
NaN	24.1235	NaN	23.9199	23.9659	NaN	NaN	NaN	NaN	NaN	23.6511	23.7047	NaN	NaN	NaN	24.5126	24.6453	23.077	24.3868	23.7107	NaN	23.9317	24.7692	24.9721	24.5723	24.7238	25.1178	24.75	NaN	24.9526					0.896401	-0.657828	-0.0487297	-0.131705		ADP-ribosylation factor, putative	PBANKA_0518500.1-p1	6	6	44.4	44.4	44.4	20.239	0	16.408	297630000
27.3828	27.6306	26.8132	27.0173	27.6824	26.8208	27.1247	26.5774	26.4545	26.6581	27.4134	27.5887	27.6583	27.441	27.4588	28.345	28.018	28.0839	28.3425	28.4869	27.9938	27.9631	28.2795	28.3371	28.1095	29.4057	29.3662	29.4078	29.2595	29.2955		+		+	-0.206767	-0.784954	-1.09167	-1.21035	G_PP1_G_WT;S_PP1_S_WT	aminopeptidase P, putative	PBANKA_1318100.1-p1	33	33	53.9	53.9	53.9	89.893	0	323.31	5199800000
25.9713	26.4205	25.6212	26.3436	25.9149	25.5179	25.8408	25.667	25.3632	25.5482	25.6635	25.566	25.6534	25.2097	25.1568	24.219	NaN	NaN	24.9607	NaN	23.7503	NaN	23.1966	NaN	NaN	NaN	NaN	NaN	NaN	24.0325					0.604402	0.137541	0.753991	-0.137836		enkurin domain-containing protein, putative	PBANKA_1330000.1-p1	7	7	28.6	28.6	28.6	31.941	0	12.523	693210000
24.5942	24.7055	24.651	24.2003	24.467	24.4413	24.2105	23.9615	23.7294	24.007	24.43	24.3374	24.4562	24.3514	24.1754	25.2031	24.8368	24.5005	24.9851	24.7971	24.7057	24.4177	24.9741	24.3802	24.3729	24.7181	24.4876	24.4758	24.5939	25.2809					0.173537	-0.280131	0.153265	-0.141122		GTPase-activating protein, putative	PBANKA_0417400.1-p1	6	6	16	16	16	40.513	0	6.2086	490870000
25.0792	25.0426	24.3406	NaN	24.6271	25.3398	25.1106	24.562	25.0113	24.122	25.3325	25.282	26.0685	25.8526	25.5374	24.7388	24.3511	25.2142	24.1622	25.2805	25.9195	25.5627	25.6386	26.1366	25.864	25.2218	NaN	25.7583	26.359	24.507	+	+			-1.2639	-0.785431	-0.164549	0.910358	G_I2_G_WT;G_PP1_G_WT	acyl-CoA synthetase, putative	PBANKA_1239900.1-p1	13	13	26.1	26.1	26.1	76.842	0	75.791	819400000
27.9146	28.1172	27.6825	27.6365	27.6598	27.8284	27.7498	27.717	27.6734	27.7266	27.6386	27.6422	27.6214	27.4087	27.3048	27.0568	27.1653	27.1123	27.3081	27.2957	27.2912	27.2331	27.5928	27.5086	27.3557	27.6375	27.5297	27.3871	27.3454	27.8198					0.279002	0.215928	-0.356266	-0.147601		glucose-6-phosphate dehydrogenase-6-phosphogluconolactonase, pu	PBANKA_1317500.1-p1	27	27	32	32	32	109.71	0	211.07	4364900000
28.0181	27.7124	28.3221	27.6928	28.5752	28.1911	28.0042	27.7712	27.8238	27.6278	28.6002	28.5669	28.6157	28.7918	28.7742	25.8691	26.2106	26.8532	26.2406	26.7833	26.2905	25.6863	26.2779	25.9801	25.9502	25.7703	25.5443	25.749	25.9836	26.804		+			-0.605652	-0.786169	0.421092	0.0667652	G_PP1_G_WT	actin II	PBANKA_1030100.1-p1	12	12	57.4	47.9	47.9	42.655	0	323.31	4249700000
32.0464	32.1966	31.9596	31.6842	31.9674	32.0855	32.0198	31.8761	31.899	31.8301	31.6513	31.737	31.6814	31.6167	31.4471	30.242	30.1958	30.2956	30.2194	30.1114	30.2103	29.8477	30.2343	29.9107	29.7693	29.9693	30.1189	30.0659	29.8451	30.7313					0.344134	0.315387	0.0667263	-0.151625		ribonucleoside-diphosphate reductase large subunit, putative	PBANKA_0611600.1-p1	54	54	61.4	61.4	61.4	97.051	0	323.31	57881000000
NaN	NaN	NaN	NaN	24.4127	24.1818	24.1372	23.8541	23.8521	23.7426	24.0892	23.8274	24.3237	23.7806	23.6193	NaN	NaN	NaN	24.2182	24.1549	23.7049	24.3348	23.9354	24.1664	24.3749	24.3821	24.2266	24.2042	24.0442	24.4301	+				-1.40692	0.0255428	-0.95405	-0.154157	G_I2_G_WT	ubiquitin carboxyl-terminal hydrolase 14, putative	PBANKA_1242000.1-p1	5	5	16.5	16.5	16.5	63.541	0	32.214	309310000
24.2975	24.2383	24.4626	24.5688	24.1654	24.8485	23.8113	23.7527	23.9879	23.9113	24.4595	24.9729	24.8392	25.1033	25.0086	23.9021	23.9325	24.0325	24.9248	25.3831	23.6776	23.2226	23.4851	23.285	23.3101	23.6881	22.8437	23.2388	23.1246	22.9724		+			-0.530165	-0.814373	1.26149	0.222554	G_PP1_G_WT	early transcribed membrane protein	PBANKA_0524200.1-p1	4	4	21.9	21.9	21.9	16.748	0	30.517	411530000
28.1624	28.6484	28.4552	27.5007	27.9938	26.4097	26.0346	25.8536	25.6802	26.0485	26.5457	26.3856	26.7685	26.261	26.2285	29.1657	29.0864	28.6658	28.7505	28.273	27.9014	27.6275	27.9517	27.5769	27.4622	27.7612	27.875	27.9234	27.5373	28.2131	+				1.71423	-0.43253	0.926279	-0.158057	G_I2_G_WT	multiprotein-bridging factor 1, putative	PBANKA_0920000.1-p1	12	12	56.6	56.6	56.6	15.625	0	49.731	4767000000
27.4769	27.6011	27.2026	26.9435	27.4474	27.3392	27.0823	27.0189	26.9973	26.982	27.3785	27.3853	27.4999	27.5274	27.4663	26.7691	26.7189	26.9576	26.6544	27.0729	26.847	26.4273	26.8767	26.8637	26.889	26.6736	26.6706	26.9191	27.1854	27.2648					-0.117172	-0.367519	-0.108101	-0.161969		V-type proton ATPase catalytic subunit A, putative	PBANKA_1410400.1-p1	16	14	36.8	36.8	32.9	68.35	0	316.43	3170600000
NaN	NaN	NaN	NaN	NaN	24.5393	25.144	24.83	24.5485	24.6614	24.4764	24.0404	24.3494	24.3663	23.9437	NaN	NaN	NaN	NaN	NaN	NaN	NaN	24.1757	24.4095	24.083	23.9352	NaN	NaN	24.1308	24.1495	+				-1.46749	0.509376	-1.31576	-0.165471	G_I2_G_WT	vacuolar protein sorting-associated protein 35, putative	PBANKA_0937100.1-p1	10	10	14.7	14.7	14.7	112.71	0	32.008	329270000
23.9919	23.9182	23.3441	23.4257	23.8248	23.3913	23.2604	23.3729	22.9416	23.1996	22.8885	23.2781	23.337	22.8127	23.1375	23.7368	23.5317	23.2424	23.6407	23.1553	23.7512	23.5069	23.886	23.9194	23.851	23.8721	24.0607	23.7894	23.6192	24.4078					0.610172	0.142391	-0.488455	-0.166936		conserved Plasmodium protein, unknown function	PBANKA_0936600.1-p1	6	6	13.1	13.1	13.1	56.777	0	7.5905	265660000
24.6348	24.5009	24.273	NaN	24.1668	23.78	23.3453	NaN	23.7096	NaN	23.6659	23.6095	23.589	24.0085	23.7025	25.2213	25.3636	25.8757	25.035	24.8991	25.4094	25.4599	25.4289	25.5379	25.6336	25.5082	25.9625	25.5544	25.0897	26.2044					0.562852	-0.728081	-0.384926	-0.169918		methyltransferase, putative	PBANKA_0906300.1-p1	12	12	32	32	32	62.613	0	93.743	592140000
26.8424	26.9217	26.8488	26.6799	26.804	26.6771	26.7191	26.4964	26.5207	26.667	26.9154	26.8365	26.9781	26.7801	26.6431	26.424	26.3726	26.3415	26.7822	26.455	26.1261	25.4869	26.2277	25.9344	25.9409	25.9831	25.6422	26.0471	26.3537	26.546					-0.0112667	-0.214575	0.360648	-0.171201		tRNA import protein tRIP, putative	PBANKA_1306200.1-p1	11	11	25.8	25.8	25.8	46.173	0	84.707	1982800000
30.5831	30.7215	30.4938	30.3359	30.8126	29.3568	29.4629	29.4844	29.4344	29.4555	30.2208	30.3997	30.2913	30.0997	30.2864	31.9626	31.5727	31.3066	31.49	31.6264	30.9662	30.286	30.8763	30.7687	30.5787	30.9575	31.0158	31.0012	31.2233	31.7477		+			0.329793	-0.820781	0.402573	-0.493914	G_PP1_G_WT	adenosylhomocysteinase, putative	PBANKA_1235600.1-p1	22	22	49.7	49.7	49.7	53.675	0	323.31	37939000000
26.9059	27.0322	26.4216	26.5436	26.7991	26.8953	26.7601	26.7453	26.7209	26.8089	26.6946	26.872	26.8604	26.6172	26.4379	27.0877	26.9774	26.8005	27.1509	26.819	26.8338	26.7314	26.9752	27.0683	26.8803	27.0355	27.0536	26.8644	26.9587	27.455					0.0440575	0.0897022	-0.106355	-0.175656		glutamate dehydrogenase, putative	PBANKA_1228200.1-p1	24	24	27.2	27.2	27.2	140.17	0	156.53	2649200000
26.1761	26.8635	25.9629	26.5264	26.3386	25.9826	25.8322	25.8307	25.7355	25.8411	25.9384	25.6324	26.0782	26.1749	26.1963	25.3923	24.5333	25.0212	24.2721	24.571	24.4233	23.2954	24.4254	24.5612	24.4495	24.0773	24.3914	24.0668	24.3215	25.1887					0.369475	-0.15961	0.348849	-0.178154		chromatin assembly factor 1 subunit, putative	PBANKA_1344300.1-p1	11	11	26.7	26.7	26.7	58.875	0	74.974	998230000
27.745	27.1118	26.5537	26.7753	27.1892	27.9941	28.037	27.8572	27.8737	27.625	28.2338	28.2675	28.4461	28.6106	28.1937	27.5576	26.9612	27.1747	27.2695	27.641	28.3206	28.1003	28.2047	28.6815	28.5732	28.4872	27.8377	28.9299	29.2992	28.2218	+				-1.27533	-0.472933	-1.23433	-0.179083	G_I2_G_WT	plasmepsin IV	PBANKA_1034400.1-p1	10	10	28.4	28.4	28.4	50.482	0	120.29	6070900000
30.2268	31.6607	28.8718	28.9841	30.4085	29.0103	28.6595	28.5893	28.7333	28.556	29.2643	29.2398	29.9772	29.7299	29.4654	28.4998	27.711	27.8402	27.1932	28.0967	28.7327	27.7714	28.1538	28.0186	27.863	27.7801	26.8323	27.8663	28.0372	27.4164		+			0.49505	-0.825638	0.281719	0.521437	G_PP1_G_WT	nucleosome assembly protein	PBANKA_0819900.1-p1	20	20	60.3	60.3	60.3	31.688	0	293.75	11823000000
NaN	NaN	NaN	NaN	NaN	NaN	NaN	NaN	NaN	NaN	NaN	NaN	NaN	NaN	NaN	24.0775	24.0995	24.0522	23.6491	23.9942	23.8899	NaN	NaN	NaN	NaN	23.1124	NaN	23.0985	23.2475	22.713					0	0	1.18297	-0.1821		fam-c protein	PBANKA_1465000.1-p1	5	5	27	27	27	116.27	0	32.626	102320000
27.0169	27.0049	26.4865	26.9015	27.0339	26.7581	26.6105	26.717	26.524	26.5959	26.721	26.8361	27.028	26.8362	26.8657	27.177	26.9425	27.1894	27.0015	27.0899	26.9906	26.1879	26.8618	26.6037	26.3835	26.4218	26.8306	26.4895	26.8028	27.3983					0.0313381	-0.216298	0.291474	-0.183071		glutaredoxin-like protein	PBANKA_0105500.1-p1	9	9	51.9	51.9	51.9	25.293	0	76.402	2388500000
NaN	NaN	NaN	NaN	NaN	24.0833	23.5082	NaN	23.9096	23.9707	24.4061	23.447	24.3824	24.5391	24.0608	NaN	NaN	NaN	NaN	NaN	NaN	NaN	NaN	NaN	NaN	NaN	NaN	NaN	24.2832	NaN	+				-2.01628	-0.456664	-0.125577	-0.183721	G_I2_G_WT	conserved Plasmodium protein, unknown function	PBANKA_1142800.1-p1	7	7	14.3	14.3	14.3	69.365	0	10.426	161640000
25.458	26.0059	25.8513	25.467	25.8227	24.9685	24.8117	24.5887	23.9685	24.5578	25.098	25.6777	25.3475	25.3479	25.553	26.7009	26.7793	26.5797	26.7643	26.3708	26.1073	25.4579	26.1848	26.1009	25.9062	25.9492	25.7933	26.0721	26.1573	26.6909		+			0.316162	-0.825755	0.506462	-0.181155	G_PP1_G_WT	conserved Plasmodium protein, unknown function	PBANKA_0314600.1-p1	12	12	29.8	29.8	29.8	59.597	0	217.77	1255100000
NaN	22.8264	22.1103	22.5215	23.3667	23.6481	23.2684	23.7655	23.8368	23.6984	23.3177	23.368	23.3487	23.3377	23.2706	22.7936	NaN	22.5272	22.4362	22.6652	NaN	NaN	22.6342	22.9679	NaN	NaN	NaN	NaN	23.0491	22.9139					-0.512716	0.314918	0.0504768	-0.185839		flavoprotein subunit of succinate dehydrogenase, putative	PBANKA_0518200.1-p1	3	3	6.5	6.5	6.5	70.446	0	8.8889	172040000
25.6653	24.775	25.492	25.3105	25.1799	24.8724	24.2125	24.4116	24.9322	24.1637	24.702	24.8277	24.9155	24.9646	25.4093	25.2328	25.4503	25.6529	25.0362	25.7948	25.173	24.2586	24.8683	24.8028	24.9961	25.0264	24.433	25.2695	25.5353	24.7801					0.320728	-0.445297	0.424513	-0.189109		early transcribed membrane protein	PBANKA_0201600.1-p1	3	3	26.6	26.6	26.6	18.672	0	120.53	702710000
28.2004	28.1393	27.7723	27.8218	28.4044	28.3989	28.2086	28.3529	28.3113	28.3141	28.6883	28.8111	28.7925	28.4025	28.3449	27.3024	27.2566	27.2586	27.2275	27.4299	27.3327	26.4511	27.1941	26.9751	26.6952	26.8873	26.4869	26.9278	27.4856	27.8207					-0.540204	-0.290701	0.173318	-0.192034		malate dehydrogenase, putative	PBANKA_1117700.1-p1	12	12	44.1	44.1	44.1	34.313	0	139.72	5737500000
27.0102	26.5502	26.5125	26.7777	27.3328	26.8131	26.9183	26.5666	26.5831	26.3346	27.3094	27.3993	27.4595	27.646	27.5441	26.271	25.8809	26.8178	26.2995	26.9449	26.3587	25.8541	26.26	26.2065	26.1085	26.6442	24.1467	26.4697	26.8443	26.3654		+			-0.634979	-0.828536	0.348755	0.0634987	G_PP1_G_WT	ubiquitin-activating enzyme E1, putative	PBANKA_1440700.1-p1	26	26	32.9	32.9	32.9	128.95	0	278.7	2250500000
28.5605	28.4047	28.9036	27.9779	29.3746	28.12	27.7723	27.7231	27.8611	27.6718	28.6195	29.1339	28.505	28.2599	28.796	29.4874	29.2026	29.6398	29.2928	29.2876	28.4103	26.7879	28.3517	27.881	27.8487	27.3086	28.2002	27.7746	28.3125	29.2771		+			-0.0185844	-0.833197	1.20744	-0.318658	G_PP1_G_WT	ubiquitin-conjugating enzyme E2, putative	PBANKA_0602800.1-p1	5	5	50.3	50.3	50.3	16.539	0	55.913	8316600000
27.1784	26.6913	27.0257	27.2496	26.685	26.3012	26.8738	26.4697	26.6842	26.548	27.4062	27.1471	27.3417	27.7246	27.4297	27.8553	27.7395	27.8539	27.5077	28.0122	26.9842	26.35	26.6822	26.8274	26.758	27.2102	26.0561	27.2848	27.2551	26.7932		+			-0.44388	-0.834488	0.873852	-0.199514	G_PP1_G_WT	elongation factor 1-beta, putative	PBANKA_0814200.1-p1	14	14	51.4	51.4	51.4	30.032	0	266.46	3143200000
27.3741	27.6624	27.3784	27.6594	27.9352	27.1158	27.1192	27.3939	27.2593	27.2206	27.7292	27.7209	27.5927	27.3947	27.5963	28.2098	28.1763	28.1171	28.0586	28.4779	27.6833	27.3269	27.8091	27.7189	27.8388	27.6775	27.7216	27.7274	27.9273	28.3081					-0.00487366	-0.385004	0.335543	-0.196989		protein transport protein SEC23, putative	PBANKA_0708000.1-p1	19	19	33.6	33.6	33.6	86.136	0	199.4	4645400000
29.8818	29.8575	29.6849	29.4963	29.812	29.3006	29.1878	28.8219	28.8935	28.8408	29.766	29.8663	29.8866	29.916	29.7868	30.585	30.3414	30.3115	30.4505	30.4201	30.0733	29.1604	29.703	29.6892	29.4978	29.9814	29.8231	30.0518	30.2722	30.6211		+			-0.0978416	-0.835398	0.271774	-0.525203	G_PP1_G_WT	M1-family alanyl aminopeptidase, putative	PBANKA_1410300.1-p1	58	58	57.5	57.5	57.5	123.35	0	323.31	19802000000
28.1841	28.2036	27.9847	28.2169	28.9191	28.4665	28.506	28.4309	28.4818	28.3146	28.9364	29.2587	28.8361	28.8912	28.9808	28.142	28.0242	28.4157	27.9965	28.2015	28.3204	27.902	28.4893	28.4062	28.2421	28.3182	28.1947	28.2713	28.5291	29.0481					-0.678934	-0.540649	-0.316284	-0.200284		T-complex protein 1 subunit eta, putative	PBANKA_0406500.1-p1	15	15	43.2	43.2	43.2	59.625	0	323.31	8168100000
NaN	NaN	25.3074	24.7943	25.2185	25.9321	25.7682	25.5014	25.999	25.5835	26.7497	26.5163	26.6355	26.8141	26.2881	NaN	NaN	25.4729	25.7111	25.7951	25.8888	25.6316	25.4735	26.2749	25.8825	26.0559	25.5723	26.2086	26.6647	25.5121	+	+			-2.624	-0.843913	-1.80149	-0.172443	G_I2_G_WT;G_PP1_G_WT	ras-related protein Rab-6	PBANKA_0904100.1-p1	3	2	17.4	17.4	12.1	23.731	0	45.447	1380900000
NaN	NaN	NaN	NaN	NaN	NaN	NaN	NaN	NaN	23.6469	NaN	NaN	NaN	NaN	NaN	24.6792	NaN	24.3689	24.2277	24.2839	24.1004	23.6078	24.1651	24.2797	24.2819	24.4997	24.7271	24.4817	NaN	24.9805					0	0.439782	-0.560986	-0.211903		ATP-dependent (S)-NAD(P)H-hydrate dehydratase, putative	PBANKA_0905100.1-p1	7	7	22.5	22.5	22.5	41.714	0	8.1536	226280000
NaN	NaN	NaN	23.5236	24.0722	22.9438	23.4885	NaN	23.4239	23.3864	23.9585	23.9834	24.2732	23.607	24.4716	23.6999	23.5512	24.4144	23.7102	25.0394	23.604	23.047	23.9181	NaN	22.9888	23.7758	23.6175	23.6039	23.5982	24.3201		+			-1.00697	-0.849311	0.299923	-0.775706	G_PP1_G_WT	protein arginine N-methyltransferase 5, putative	PBANKA_1137100.1-p1	8	8	14.6	14.6	14.6	85.796	0	19.403	262980000
26.084	26.2075	26.2193	24.9759	26.1081	25.0187	24.4228	23.8393	24.4491	24.159	25.2907	25.1387	25.2302	25.2887	25.2714	26.8418	26.6375	26.3123	26.5953	26.059	25.7349	24.9847	25.2453	25.2835	24.9385	25.9108	25.8704	25.9263	25.7465	26.5735		+			0.675015	-0.866148	0.483685	-0.768128	G_PP1_G_WT	ataxin-3, putative	PBANKA_1441600.1-p1	9	9	32.3	32.3	32.3	45.126	0	111.09	1124900000
25.573	25.4917	25.0998	24.9574	25.4285	24.9068	24.4366	24.483	24.2978	23.8935	24.7173	24.9187	24.8206	24.6696	25.2612	26.0245	25.8658	26.1504	25.6172	25.9968	25.405	24.6323	25.2107	25.303	24.8298	24.6281	25.1229	25.1781	25.5522	25.9853					0.432602	-0.473946	0.637608	-0.217162		dihydroorotase, putative	PBANKA_1336100.1-p1	10	10	31.6	31.6	31.6	41.696	0	32.099	815720000
24.8607	24.9657	24.8871	24.3476	24.7144	23.6553	24.1455	NaN	23.7247	24.1726	23.9337	23.972	23.8864	23.6762	23.6209	23.324	23.5534	23.8253	23.3115	23.7917	NaN	NaN	22.9504	NaN	NaN	NaN	NaN	NaN	NaN	NaN	+		+		0.937253	-0.349842	1.3594	-0.225246	G_I2_G_WT;S_I2_S_WT	exonuclease V, mitochondrial, putative	PBANKA_1322400.1-p1	4	4	13.6	13.6	13.6	41.863	0	10.703	272680000
NaN	NaN	24.5453	24.6556	25.126	24.9001	25.0016	24.8203	24.404	24.6337	25.1162	25.2625	25.1282	25.1021	25.0393	NaN	NaN	23.916	23.8597	24.338	NaN	NaN	23.6693	NaN	NaN	NaN	NaN	NaN	NaN	23.8614					-0.989637	-0.377734	1.30737	-0.22649		methyltransferase, putative	PBANKA_1318900.1-p1	5	5	31.2	31.2	31.2	23.77	0	24.773	433070000
31.0213	31.1245	31.0901	30.563	31.3371	30.113	29.6915	29.8128	29.8334	29.9574	30.698	30.8888	30.5089	30.6488	31.0055	32.3025	31.9172	31.9616	31.8511	31.9741	31.1993	29.7519	30.6279	30.5871	30.1545	30.0654	30.0354	30.3268	30.6696	31.7953		+	+		0.277184	-0.868412	1.42283	-0.114349	G_PP1_G_WT;S_I2_S_WT	receptor for activated c kinase, putative	PBANKA_0703900.1-p1	15	15	60.6	60.6	60.6	35.583	0	323.31	43588000000
27.5983	26.7962	27.4967	27.1285	27.0115	27.9023	27.7261	27.1963	27.6802	27.2775	28.3702	28.3002	28.3226	28.7301	28.4598	27.0142	26.8567	27.2869	26.8395	27.5236	28.0305	28.0309	27.918	28.3801	28.2234	27.9958	26.3062	28.3777	28.6839	27.0237	+	+			-1.23034	-0.880094	-0.573255	0.439116	G_I2_G_WT;G_PP1_G_WT	GTP-binding nuclear protein RAN/TC4, putative	PBANKA_0930300.1-p1	14	11	58.9	58.9	48.6	24.886	0	154.74	4847300000
27.7311	27.63	27.3388	27.3519	27.4484	26.2459	26.5262	26.4268	26.2678	26.1546	26.4317	26.5088	26.6249	26.5111	26.6684	27.8826	27.7738	27.5201	27.2242	27.4384	26.6672	26.032	26.4251	26.5069	26.2124	26.5271	26.5063	26.497	26.3792	27.1376	+				0.95108	-0.224721	0.958398	-0.240714	G_I2_G_WT	V-type proton ATPase subunit G, putative	PBANKA_1338400.1-p1	7	7	45.5	45.5	45.5	14.05	0	29.277	2635800000
25.228	25.5989	24.9453	25.0708	25.4556	24.3945	24.5523	24.0859	24.4362	23.8683	24.9783	25.246	25.3764	24.9006	25.2719	26.47	26.2426	26.2379	26.026	26.3083	25.3939	24.4551	25.6493	25.2116	24.7466	24.8187	25.7544	25.0488	25.1418	26.2688		+			0.105109	-0.887205	0.850441	-0.31521	G_PP1_G_WT	prefoldin subunit 6, putative	PBANKA_1111600.1-p1	6	6	46.2	46.2	46.2	13.876	0	23.364	891300000
30.979	30.9232	30.8961	30.8903	31.1292	30.2825	30.2828	30.0099	30.2421	29.8398	31.0317	30.971	31.07	31.1449	30.904	30.2107	30.0385	30.3255	29.931	30.695	29.5471	29.421	29.6579	29.538	29.4626	30.1389	30.1198	30.0951	30.1759	30.1342		+			-0.0607487	-0.892893	0.107365	-0.607457	G_PP1_G_WT	14-3-3 protein	PBANKA_0712600.1-p1	21	19	61.1	61.1	58	30.203	0	323.31	30293000000
28.1834	28.4334	28.6505	28.1132	28.7915	28.6126	28.4629	28.3779	28.4357	28.478	29.4848	29.5823	29.3134	29.2384	29.2487	28.6854	28.3351	28.4966	28.4452	28.7431	28.2812	27.7608	28.5163	28.3394	28.2021	28.4084	28.2558	28.4914	28.7713	29.3888	+	+			-0.939121	-0.900133	-0.122051	-0.443192	G_I2_G_WT;G_PP1_G_WT	T-complex protein 1 subunit epsilon, putative	PBANKA_1218200.1-p1	24	24	46.4	46.4	46.4	59.183	0	323.31	8837200000
NaN	NaN	25.016	NaN	25.5963	24.5853	24.2639	24.2517	24.4644	NaN	25.2441	25.2041	25.4003	25.0099	24.3231	25.6098	25.1492	25.6715	25.4683	25.6187	NaN	NaN	NaN	NaN	NaN	NaN	NaN	NaN	NaN	24.4541	+	+	+		-1.35312	-0.902746	3.04252	0.16385	G_I2_G_WT;G_PP1_G_WT;S_I2_S_WT	ubiquitin-conjugating enzyme E2, putative	PBANKA_1424900.1-p1	2	2	17.6	17.6	17.6	19.064	0	38.464	575790000
NaN	NaN	NaN	NaN	NaN	NaN	NaN	NaN	NaN	23.2575	23.3896	23.0036	22.8539	22.264	NaN	NaN	NaN	NaN	NaN	NaN	23.8067	NaN	23.6639	23.6509	23.7561	23.4875	23.4171	23.2162	23.0388	23.9837		+			-0.337343	-0.911111	-1.17083	0.0288124	G_PP1_G_WT	Qa-SNARE protein, putative	PBANKA_1346800.1-p1	3	3	12.1	12.1	12.1	33.27	0	12.003	133970000
NaN	24.11	24.4306	24.6986	24.2216	24.4356	24.3693	23.7272	24.1859	23.8335	24.5865	24.439	24.3917	25.0421	24.5422	22.8753	NaN	NaN	NaN	23.1018	22.4683	NaN	22.0652	21.836	22.041	NaN	NaN	NaN	22.5514	NaN					-0.60437	-0.489982	0.367973	-0.260273		plasmepsin X, putative	PBANKA_1222500.1-p1	7	7	15.9	15.9	15.9	62.74	0	10.88	298470000
27.7972	27.7767	27.7943	27.7891	28.0143	27.6129	27.4098	27.181	27.2906	26.9946	28.2198	28.232	28.1602	28.268	28.1867	27.3679	26.9527	27.1083	27.1576	27.3546	26.9909	26.7262	26.9523	27.1239	27.0535	27.0674	26.4649	27.2343	27.5923	27.4619		+			-0.379041	-0.915556	0.0240631	-0.194808	G_PP1_G_WT	ribonucleoside-diphosphate reductase small chain, putative	PBANKA_1036600.1-p1	14	14	49.9	49.9	49.9	40.485	0	152.24	3872500000
24.4129	24.5463	24.2728	24.423	24.7289	24.1648	23.8649	23.8263	23.9652	23.6759	23.7051	24.0527	24.1856	23.6986	23.9521	26.2933	25.9613	26.9035	26.3051	25.9294	24.9045	24.2156	25.1303	24.6984	24.7149	24.4582	25.0772	24.9617	24.6944	25.7941					0.557948	-0.0194008	1.2814	-0.26435		gamma-glutamylcysteine synthetase	PBANKA_0819800.1-p1	16	16	20.4	20.4	20.4	113.41	0	68.516	709360000
29.8153	30.0661	29.868	29.5786	30.2711	29.0683	28.9034	29.106	29.108	29.0895	30.1428	30.262	29.9163	29.6198	29.9631	30.3834	30.154	30.3958	30.3601	30.5227	29.2972	28.6912	29.2506	29.121	29.0008	29.3891	29.5585	29.529	29.5777	30.5773		+			-0.0609718	-0.92576	0.636867	-0.654197	G_PP1_G_WT	asparagine synthetase [glutamine-hydrolyzing]	PBANKA_0407600.1-p1	26	26	42.9	42.9	42.9	66.378	0	323.31	18852000000
NaN	NaN	NaN	24.245	NaN	25.371	24.8841	24.7269	24.8689	NaN	24.0937	24.9367	24.8562	24.5203	24.7215	26.7036	26.3268	26.7743	26.5468	27.5101	26.5955	25.7266	26.1614	25.896	26.2015	26.5875	25.743	26.6036	27.1204	25.8858	+				-1.15607	-0.333712	0.384269	-0.271859	G_I2_G_WT	MSP7-like protein	PBANKA_1349100.1-p1	9	9	41.2	41.2	41.2	37.705	0	198.53	1172100000
NaN	NaN	NaN	NaN	23.1425	23.9682	23.8516	23.7785	23.5504	23.6947	24.5684	24.161	24.8049	25.1031	24.8673	NaN	NaN	NaN	NaN	NaN	23.8945	23.6707	23.5906	24.0065	NaN	NaN	NaN	24.0394	24.2758	23.1108	+	+			-1.72462	-0.932296	-0.585471	0.0583099	G_I2_G_WT;G_PP1_G_WT	ras-related protein Rab-11A	PBANKA_1418900.1-p1	5	5	37	28.2	28.2	24.755	0	8.6588	235150000
NaN	NaN	NaN	NaN	23.8752	24.2579	24.1494	24.3014	23.8079	23.7617	24.0556	24.0565	24.1915	24.6425	24.1229	26.5945	25.3746	26.2467	26.3324	26.2475	25.8115	25.0532	25.2732	25.2116	25.1027	25.2454	25.3346	25.4255	25.6865	26.1382	+				-1.84211	-0.158123	0.59312	-0.275606	G_I2_G_WT	RNA-binding protein, putative	PBANKA_0707400.1-p1	7	7	33.7	33.7	33.7	32.906	0	134.7	739930000
25.7246	25.5736	25.7671	25.4306	25.6466	25.4312	25.1857	24.9901	24.3981	24.9557	25.9978	25.6908	26.138	25.7527	26.0642	27.1111	27.056	27.061	27.0724	27.069	26.7591	25.5571	26.5053	26.4464	26.2201	26.6099	26.3792	26.7483	27.042	27.2971		+			-0.300214	-0.936529	0.258582	-0.517707	G_PP1_G_WT	Obg-like ATPase 1, putative	PBANKA_0619900.1-p1	13	13	39.7	39.7	39.7	45.32	0	177.86	1653200000
25.5338	25.1132	25.0909	24.6828	25.9924	27.1677	26.6427	26.7544	27.0113	26.4816	26.177	26.2228	26.6886	26.9006	25.757	NaN	NaN	23.6857	22.6631	NaN	NaN	23.2369	NaN	23.532	23.9488	24.1258	NaN	23.261	24.0873	24.3525	+				-1.06658	0.462321	-0.789397	-0.276046	G_I2_G_WT	mitogen-activated protein kinase 2	PBANKA_0933700.1-p1	12	12	35.4	35.4	35.4	61.121	0	93.975	1140100000
NaN	NaN	NaN	NaN	NaN	NaN	NaN	NaN	NaN	NaN	NaN	NaN	NaN	NaN	NaN	NaN	NaN	23.1535	NaN	23.4801	22.185	22.5662	22.6151	22.8321	22.746	NaN	NaN	NaN	NaN	NaN					0	0	-0.227985	-0.277919		conserved Plasmodium protein, unknown function	PBANKA_1108500.1-p1	7	7	3.8	3.8	3.8	297.86	0	42.846	66377000
25.0008	25.1224	24.6473	24.8888	25.3621	25.4925	25.1795	25.0628	25.3886	25.3997	25.6269	25.7705	25.7638	26.0191	25.8284	24.978	24.5266	25.0056	24.9097	25.6751	24.475	24.382	24.8696	24.7992	24.6658	24.8224	24.171	24.8345	25.3839	25.3752					-0.797443	-0.497126	0.101609	-0.279084		mitochondrial-processing peptidase subunit beta, putative	PBANKA_0834400.1-p1	8	8	22.3	22.3	22.3	54.987	0	38.085	805870000
28.4035	28.7547	28.2235	28.1764	28.4284	28.0946	28.0294	27.935	27.8085	28.1241	27.8964	28.0691	27.9838	27.5827	27.5532	28.9233	28.7553	28.6203	29.0189	28.4404	28.9406	28.3061	29.1038	28.9195	28.7478	28.9274	28.9556	28.9591	28.9388	29.6645					0.580264	0.181257	-0.337448	-0.285516		RuvB-like helicase 2, putative	PBANKA_0940900.1-p1	21	21	54.3	54.3	54.3	53.405	0	323.31	8421900000
29.0263	29.31	28.7098	28.8083	29.1543	28.9841	28.8596	28.8992	28.937	29.0494	28.4444	28.7138	28.6723	28.5129	28.5172	28.3966	28.4866	28.2731	28.3147	27.7781	28.0538	27.5598	27.8935	27.8186	27.2069	27.7516	27.9998	27.9238	27.5382	28.7484					0.429602	0.37372	0.257454	-0.285847		ATP-dependent 6-phosphofructokinase, putative	PBANKA_0919900.1-p1	51	51	44.2	44.2	44.2	159.65	0	323.31	8561600000
NaN	NaN	NaN	NaN	24.2905	24.4758	24.6706	23.6123	24.1796	23.878	24.3376	24.3936	24.4144	24.2513	24.5189	25.8856	25.2729	26.1621	25.5348	25.4723	25.5711	24.1102	24.7472	24.4984	24.7417	24.7064	24.8738	24.8621	24.7827	25.8958	+				-1.9305	-0.219891	0.641373	-0.290435	G_I2_G_WT	valine--tRNA ligase, putative	PBANKA_1325600.1-p1	10	10	13.3	13.3	13.3	126.1	0	44.373	589420000
27.0457	27.3198	26.9759	26.6453	26.8069	26.4746	26.4321	26.0848	25.8191	26.0692	26.4555	26.6713	26.5759	26.5621	26.383	26.4579	26.3563	26.0673	26.4482	26.109	26.1908	25.5402	26.1629	26.0102	25.9404	26.2579	26.3342	25.9428	25.9553	26.8165					0.429155	-0.353587	0.0263893	-0.292457		adenylate kinase 2, putative	PBANKA_0713900.1-p1	10	10	47.6	47.6	47.6	31.867	0	54.558	1777500000
NaN	NaN	NaN	NaN	25.8475	24.4018	24.575	NaN	24.304	NaN	24.4016	24.3458	24.8523	24.9274	24.9109	25.7477	25.9359	26.116	25.4913	25.7695	24.923	24.3377	24.5548	24.5699	24.6488	24.1376	23.5308	24.4523	24.9026	24.3084	+	+	+		-1.38582	-0.971203	1.54576	0.340499	G_I2_G_WT;G_PP1_G_WT;S_I2_S_WT	ran-specific GTPase-activating protein 1, putative	PBANKA_0721700.1-p1	7	7	29.3	29.3	29.3	32.079	0	19.785	604200000
25.0707	24.5252	24.4514	24.7429	25.1073	24.8002	25.4785	24.9957	24.9537	24.8069	25.6962	25.9435	25.9945	26.322	26.0065	24.8282	24.4651	24.1754	24.8039	24.9475	25.3793	23.7083	24.7732	24.2216	24.3057	25.2108	23.328	25.5508	26.1722	25.4826	+	+			-1.21306	-0.985553	-0.504865	-0.67124	G_I2_G_WT;G_PP1_G_WT	elongation factor 1-delta, putative	PBANKA_1218900.1-p1	4	4	46.5	46.5	46.5	17.659	0	94.929	775700000
24.9384	24.7064	24.1203	NaN	24.6708	NaN	NaN	NaN	24.1035	24.1462	24.3222	24.449	24.1666	24.0679	24.4342	25.017	25.1381	24.9035	24.5112	24.5996	24.2044	NaN	24.2097	24.0408	23.6591	24.0418	24.0757	23.6159	23.9284	24.6874		+			-0.110698	-0.998757	0.764046	-0.29746	G_PP1_G_WT	conserved Plasmodium protein, unknown function	PBANKA_0512700.1-p1	6	6	56.3	56.3	56.3	17.014	0	50.812	404580000
26.5288	26.84	26.2216	26.5162	26.9543	26.1662	26.3658	26.4652	26.3648	26.5572	26.5351	26.6182	26.3576	26.1892	26.3332	26.7371	26.6	26.6647	26.819	26.7771	25.9192	25.5291	26.0566	25.6244	25.7531	25.8659	26.0445	25.8071	25.9362	26.7421					0.205525	-0.0228039	0.640381	-0.302707		conserved Plasmodium protein, unknown function	PBANKA_1451500.1-p1	13	13	50.4	50.4	50.4	43.098	0	126.79	1888200000
NaN	NaN	NaN	NaN	NaN	23.8504	23.7116	NaN	23.4603	23.7098	24.0301	23.9247	24.3596	24.1123	24.1026	NaN	NaN	NaN	NaN	NaN	24.2826	23.3677	23.8417	24.0841	23.8998	24.2064	23.7016	24.0387	24.3397	24.7076	+		+		-1.59732	-0.604266	-1.85585	-0.303617	G_I2_G_WT;S_I2_S_WT	UMP-CMP kinase, putative	PBANKA_0202300.1-p1	6	6	20.2	20.2	20.2	42.985	0	120.63	270700000
29.3128	29.0452	29.1296	28.6838	29.6279	28.7307	28.7369	28.4601	28.5469	28.3697	29.5414	29.4268	29.5415	29.7468	29.6278	27.1712	26.2225	27.4532	27.0097	27.7098	26.0801	24.9141	24.5211	25.5561	25.7553	26.7329	NaN	27.0964	27.5428	26.2663		+			-0.417018	-1.00801	1.20218	-0.54577	G_PP1_G_WT	serine hydroxymethyltransferase, putative	PBANKA_1450200.1-p1	23	23	48	48	48	49.624	0	270.7	7383100000
24.9941	24.2412	24.4108	24.7175	24.5298	22.9403	23.4944	22.7788	23.0735	22.9705	24.0262	23.885	24.1649	24.4445	23.7776	NaN	NaN	23.8452	23.9496	24.5355	23.3115	23.7524	22.7034	22.8946	22.3597	23.3343	NaN	23.3253	23.5606	NaN		+			0.519028	-1.00815	0.414811	-0.0650677	G_PP1_G_WT	mitochondrial acidic protein MAM33, putative	PBANKA_1010000.1-p1	5	5	27	27	27	28.907	0	41.204	238280000
NaN	NaN	23.8596	NaN	24.324	24.2059	23.8015	24.2046	24.129	24.4419	23.9983	23.8612	23.9671	23.9605	23.8511	25.1017	24.886	24.7998	24.9862	24.5438	25.0003	24.2534	24.909	24.8374	24.5801	25.1587	25.0536	24.9226	24.5569	25.4286					-1.17042	0.228979	-0.160573	-0.308002		Sec1 family protein, putative	PBANKA_0517800.1-p1	8	8	18.8	18.8	18.8	74.092	0	21.056	466990000
26.0999	25.5022	25.7972	25.4407	25.8772	25.4957	25.1833	25.0574	24.8112	24.7196	25.7483	25.951	25.6956	25.1882	25.3015	27.0858	26.7959	26.6659	26.976	26.8689	26.2129	25.476	26.2988	26.5163	26.4582	26.4254	26.3699	26.201	26.3568	27.1491					0.166513	-0.5235	0.378045	-0.30802		ethanolamine kinase, putative	PBANKA_0923700.1-p1	14	14	37.8	37.8	37.8	51.002	0	60.214	1466800000
27.3535	24.5057	27.4555	27.1157	26.4354	27.883	27.826	26.8006	27.2965	26.7675	28.1726	28.097	28.3226	28.6667	28.3712	26.405	24.1796	27.0767	25.9806	27.5763	27.1617	26.5051	26.084	27.0166	27.2491	28.0008	NaN	28.1803	28.3915	24.0136	+	+			-1.75283	-1.01128	0.122197	0.681841	G_I2_G_WT;G_PP1_G_WT	endoplasmic reticulum-resident calcium binding protein, putative	PBANKA_0938400.1-p1	19	19	68.4	68.4	68.4	39.122	0	323.31	3549000000
26.6865	26.8174	26.8265	26.8676	26.4685	25.5356	25.1418	24.5892	24.9984	24.4774	25.7871	25.9006	26.1724	26.0184	26.0735	26.3214	25.5773	26.8123	26.1961	26.8576	24.7311	NaN	24.4396	24.0984	23.7313	24.9198	24.8191	25.2255	24.4774	25.3648		+	+		0.742909	-1.04191	1.39164	-1.11296	G_PP1_G_WT;S_I2_S_WT	Maf-like protein, putative	PBANKA_0415000.1-p1	11	11	25.8	25.8	25.8	52.816	0	35.62	1179900000
28.8863	28.7691	28.8121	28.8668	28.7083	27.5797	27.2267	26.9365	26.98	27.1521	28.0103	28.2943	28.2013	28.2802	28.3068	27.5656	27.5983	27.7588	27.3073	27.4093	26.4866	25.3875	25.9536	25.6647	25.4311	25.721	25.8478	25.9402	25.6362	27.2841		+	+		0.58992	-1.04358	1.44199	-0.301172	G_PP1_G_WT;S_I2_S_WT	meiosis-specific nuclear structural protein 1, putative	PBANKA_1409600.1-p1	22	22	36.8	36.8	36.8	59.504	0	323.31	4196400000
26.0566	25.5526	25.5194	25.6806	25.9283	25.632	25.9147	25.5269	25.7632	25.4044	26.6684	26.6276	26.7318	26.8539	26.5836	24.9428	24.9465	25.5362	25.1684	26.1631	26.0119	25.3444	25.3962	25.7797	25.8292	26.3932	NaN	26.533	26.9229	26.009	+	+			-0.945557	-1.0448	-0.110392	0.210454	G_I2_G_WT;G_PP1_G_WT	proteasome subunit alpha type-5, putative	PBANKA_0211500.1-p1	8	7	40.6	40.6	36.7	28.347	0	70.915	1301000000
25.9623	25.6232	25.131	25.7855	25.9378	25.6452	25.8737	25.3692	25.5479	25.286	26.4926	26.496	26.6333	26.8309	26.5012	25.5781	25.2584	25.8252	25.5303	25.9857	26.2698	25.5552	25.7284	25.8302	25.9892	26.4644	25.1627	26.4691	27.0644	26.1579	+	+			-0.902831	-1.04641	-0.62818	-0.389142	G_I2_G_WT;G_PP1_G_WT	proteasome subunit alpha type-7, putative	PBANKA_1130500.1-p1	7	7	43.2	43.2	43.2	27.18	0	84.623	1346900000
NaN	NaN	NaN	NaN	NaN	NaN	NaN	NaN	NaN	NaN	23.9203	23.8527	NaN	23.5568	NaN	NaN	NaN	NaN	NaN	NaN	NaN	NaN	24.1584	24.2359	24.1227	24.2802	24.423	24.3681	24.4893	25.7448		+	+		-0.897309	-1.05503	-2.40165	-1.29097	G_PP1_G_WT;S_I2_S_WT	NLI interacting factor-like phosphatase	PBANKA_1132000.1-p1	8	8	8.8	8.8	8.8	133.78	0	8.6207	185050000
24.3566	24.4274	24.4512	23.9415	NaN	24.8062	24.6955	24.4049	24.7553	24.1926	25.6182	25.8125	25.3899	25.7004	25.623	24.8395	24.6548	25.1306	25.0197	25.2217	25.0761	24.3382	24.4366	24.8418	24.7963	25.5431	23.7752	25.7574	26.4015	24.9178	+	+			-1.64977	-1.05787	-0.305744	-0.581186	G_I2_G_WT;G_PP1_G_WT	ornithine aminotransferase, putative	PBANKA_0107400.1-p1	6	6	17.4	17.4	17.4	46.323	0	61.006	649400000
25.6031	25.7083	NaN	NaN	25.6991	23.8026	NaN	23.8929	NaN	NaN	24.6137	24.9836	24.7342	24.5585	NaN	27.1224	NaN	27.7243	24.9731	25.0193	27.1937	26.5891	26.8195	26.7208	26.6849	NaN	27.1624	26.479	25.7982	28.031		+			0.393688	-1.06424	-0.381951	0.851272	G_PP1_G_WT	conserved Plasmodium protein, unknown function	PBANKA_0814400.1-p1	3	3	21.7	21.7	21.7	20.328	0	19.779	1434400000
25.674	25.5408	25.3993	25.8538	25.4221	24.6773	24.5683	24.7456	24.4191	24.4156	25.0558	24.8881	25.4	25.1926	24.9024	25.7958	25.6731	25.4196	25.8838	25.2146	25.3425	24.8561	25.3229	25.2892	25.0171	25.6399	25.7421	25.2863	25.0329	25.824					0.49021	-0.522581	0.0923309	-0.339504		cAMP-dependent protein kinase catalytic subunit	PBANKA_0835600.1-p1	7	6	21.7	21.7	19.1	40.133	0	16.463	848580000
26.0149	26.429	25.7774	25.7717	26.1316	25.7426	25.9377	25.7059	25.6205	25.6919	25.7195	25.6745	26.001	25.9016	25.7089	26.2477	25.9368	26.1646	26.1082	25.8966	25.9991	25.685	25.6601	25.6791	25.5689	25.6647	26.1151	25.934	25.8001	26.7762					0.223812	-0.0613972	0.0127487	-0.339601		ferrodoxin reductase-like protein, putative	PBANKA_0617900.1-p1	17	17	28.1	28.1	28.1	74.616	0	83.774	1331200000
33.02	32.7545	32.7208	32.5406	32.9316	32.1371	32.4108	32.1017	32.1015	32.0334	33.0976	33.2309	33.2216	33.3324	33.2625	31.2999	30.9382	31.1815	31.036	31.2639	31.1721	30.8019	30.9201	30.9173	30.8965	31.9795	31.487	31.885	31.8843	32.058		+			-0.435503	-1.0721	-0.714857	-0.917178	G_PP1_G_WT	fructose-bisphosphate aldolase 2	PBANKA_1308600.1-p1	28	28	71.3	71.3	71.3	39.851	0	323.31	100610000000
NaN	NaN	NaN	NaN	23.6469	23.8281	23.5693	23.6502	23.5249	23.6699	23.5412	23.5807	23.6285	23.6425	23.5209	23.5769	23.8907	23.6197	23.7681	23.2106	23.8073	NaN	23.3938	23.9408	23.4725	23.5615	NaN	23.9645	24.0014	24.0892	+				-1.18161	0.0657413	0.0999352	-0.345836	G_I2_G_WT	insulinase, putative	PBANKA_0929800.1-p1	9	9	9.5	9.5	9.5	145.69	0	17.918	249630000
24.655	24.0264	24.386	24.0388	24.8137	NaN	23.7102	23.9673	23.9089	24.1812	22.7764	23.9728	NaN	24.0134	24.7307	22.9566	23.5065	23.1153	NaN	22.9858	NaN	NaN	NaN	NaN	NaN	NaN	NaN	NaN	NaN	23.219					0.576884	-0.316281	0.399226	-0.352662		thioredoxin-like protein	PBANKA_1325700.1-p1	3	3	31.4	31.4	31.4	14.382	0	37.767	241440000
29.964	28.8178	29.5317	29.4453	29.0183	29.8202	29.8695	29.0468	29.4052	29.1699	30.3874	30.3152	30.5702	30.9047	30.5363	28.4073	28.0948	28.9437	28.1084	29.2861	29.1931	28.2709	28.008	28.7165	28.5424	29.7306	27.4212	29.8614	30.2573	28.0459	+	+			-1.18733	-1.08041	-0.49521	-0.517091	G_I2_G_WT;G_PP1_G_WT	protein disulfide isomerase	PBANKA_0702800.1-p1	25	25	57.5	57.5	57.5	55.41	0	323.31	15402000000
25.2575	25.641	25.1939	24.9696	25.6033	24.9212	24.6597	24.7425	24.5718	24.9066	25.0369	25.1882	25.1207	24.8865	24.8642	25.6071	25.6999	25.4012	25.4108	25.6875	25.1366	24.5155	25.329	25.1168	24.7605	24.9946	25.2511	25.3596	25.0738	25.9553					0.313777	-0.258928	0.234419	-0.35519		PI31 domain-containing protein, putative	PBANKA_1208500.1-p1	9	9	36	36	36	33.83	0	28.582	784600000
NaN	NaN	NaN	NaN	NaN	23.5391	23.6493	NaN	23.6458	NaN	24.217	23.9989	24.317	24.7165	24.3786	NaN	NaN	NaN	NaN	NaN	23.3397	NaN	NaN	NaN	NaN	NaN	NaN	NaN	23.7217	NaN	+	+			-1.68321	-1.08162	0.196407	0.498434	G_I2_G_WT;G_PP1_G_WT	2-oxoisovalerate dehydrogenase subunit beta, mitochondrial, puta	PBANKA_1104200.1-p1	4	4	13.2	13.2	13.2	41.611	0	7.368	119640000
25.695	25.4379	25.4876	25.4452	25.5327	25.2882	25.4015	25.1295	25.3373	25.0267	26.1862	26.4535	26.274	26.3934	26.3057	25.2445	25.1086	25.7369	24.8013	25.9949	25.4718	24.815	24.7717	25.115	24.7506	25.9812	NaN	26.4488	26.7665	25.2991	+	+			-0.802872	-1.08593	0.14716	-0.245242	G_I2_G_WT;G_PP1_G_WT	proteasome subunit beta type-5, putative	PBANKA_1209800.1-p1	6	6	27.4	27.4	27.4	30.61	0	42.404	1033100000
24.0537	24.4851	24.0488	23.7758	24.5614	NaN	25.218	25.5201	25.7477	NaN	25.577	25.3206	25.0354	25.483	24.6593	25.4905	25.1608	25.2896	25.5775	25.7101	26.0828	25.4596	26.4089	26.2021	25.9632	25.1303	24.137	25.413	25.5315	25.678	+	+			-1.03012	-1.08959	0.267708	0.845327	G_I2_G_WT;G_PP1_G_WT	single-strand telomeric DNA-binding protein GBP2, putative	PBANKA_1205000.1-p1	4	4	17.6	17.6	17.6	27.843	0	16.465	943320000
25.0005	24.2735	24.6105	24.0265	24.5183	25.1342	25.1123	24.5216	24.5419	24.5506	25.8642	25.7697	26.0011	26.1538	25.5791	24.1555	23.8351	25.0014	24.4307	25.3406	25.089	23.8213	23.9349	24.1678	24.6467	24.5112	24.098	25.1281	26.0181	NaN	+	+			-1.38775	-1.10149	0.1368	-0.0838833	G_I2_G_WT;G_PP1_G_WT	adenylate kinase, putative	PBANKA_1207200.1-p1	6	6	33.5	33.5	33.5	27.399	0	13.404	633670000
27.5283	26.493	28.1097	27.5586	27.3522	27.5757	27.8918	27.1441	27.6213	27.1855	28.5653	28.4463	28.5615	28.6741	28.7207	27.6689	27.651	28.3955	27.1569	28.6848	28.1166	26.9858	26.8021	27.0244	27.2553	28.1757	26.2972	28.8317	29.6063	27.6169	+	+			-1.18522	-1.10989	-0.194136	-0.868719	G_I2_G_WT;G_PP1_G_WT	purine nucleoside phosphorylase, putative	PBANKA_1113000.1-p1	10	10	52	52	52	27.007	0	146.13	5382800000
25.6001	26.265	25.882	25.4325	26.2349	24.7155	24.7824	24.2976	24.8636	24.8917	25.7573	26.0136	25.9232	25.8297	25.6161	27.4132	27.1227	26.8877	27.3537	27.1902	26.5623	25.6683	26.493	26.2272	26.2577	26.7425	27.1161	26.737	26.7166	27.7129		+			0.0549492	-1.11781	0.188481	-0.763313	G_PP1_G_WT	glutathione synthetase	PBANKA_1111800.1-p1	20	20	39	39	39	73.334	0	202.49	1713600000
27.3813	26.3108	27.2569	26.8649	26.5007	27.6794	27.7159	27.0006	27.3019	26.8448	28.2363	28.3297	28.4611	28.6681	28.4549	26.2242	25.9411	27.0252	26.101	27.5112	27.9856	27.3697	26.4205	27.6279	27.714	28.4814	25.6038	28.8646	29.1268	26.5476	+	+			-1.5671	-1.1215	-1.16429	-0.301274	G_I2_G_WT;G_PP1_G_WT	conserved Plasmodium protein, unknown function	PBANKA_0826700.1-p1	6	6	32	32	32	25.252	0	74.405	4220600000
NaN	NaN	NaN	NaN	NaN	NaN	NaN	NaN	23.8684	NaN	24.02	23.8508	23.6771	23.6808	23.7417	NaN	NaN	NaN	NaN	NaN	24.4428	24.2028	23.714	24.1558	NaN	24.045	NaN	24.1223	24.3249	23.7253	+	+			-1.22342	-1.12324	-1.13897	0.0714462	G_I2_G_WT;G_PP1_G_WT	Plasmodium exported protein, unknown function	PBANKA_0300600.1-p1	5	5	12.6	12.6	12.6	72.473	0	13.845	245650000
28.4213	28.5659	28.5521	28.2588	28.9635	27.4425	27.1847	27.5523	27.6043	27.3417	28.6158	28.8392	28.7297	28.2123	28.3624	28.9923	28.6671	29.2639	28.7339	29.201	28.0626	27.2333	28.0669	27.816	27.6127	26.8097	27.8714	27.064	27.632	28.7249		+			0.000404739	-1.12681	1.35126	0.137883	G_PP1_G_WT	N-ethylmaleimide-sensitive fusion protein, putative	PBANKA_0401600.1-p1	31	31	47	47	47	88.12	0	323.31	6691600000
NaN	NaN	NaN	NaN	NaN	25.4776	25.379	24.4403	24.7972	24.3922	26.0541	25.6742	26.0916	26.3927	25.9193	NaN	NaN	24.4803	NaN	25.4563	25.1157	24.4753	24.8563	25.1122	24.8096	25.6656	NaN	25.8129	26.4067	NaN	+	+			-4.0376	-1.1291	-1.30654	0.290153	G_I2_G_WT;G_PP1_G_WT	profilin	PBANKA_0833000.1-p1	7	7	52.9	52.9	52.9	19.266	0	92.873	643650000
NaN	NaN	NaN	NaN	NaN	23.035	23.1039	22.5694	22.8404	22.876	22.7812	22.9269	22.5316	22.9049	22.6942	NaN	NaN	NaN	NaN	NaN	NaN	NaN	NaN	NaN	NaN	NaN	NaN	NaN	23.0383	NaN					-0.399842	0.117204	0.182767	-0.388877		translocation protein sec62, putative	PBANKA_1302200.1-p1	5	5	15.8	15.8	15.8	44.515	0	4.4148	70986000
26.2021	25.9524	25.5856	26.0555	26.0781	25.6492	26.0193	25.7186	25.7572	25.6068	26.7017	26.6164	26.9191	27.2305	27.0031	NaN	24.9355	26.0802	25.7334	26.4855	25.9945	24.9905	25.4916	25.2734	25.3621	26.582	24.8919	26.5667	27.0893	25.76	+	+			-0.919447	-1.14398	-0.900308	-0.755575	G_I2_G_WT;G_PP1_G_WT	proteasome subunit alpha type-2, putative	PBANKA_0107100.1-p1	13	13	69.8	69.8	69.8	26.445	0	63.997	1346400000
24.9558	25.1006	24.9389	25.4574	25.5311	25.0314	25.3701	24.6532	24.9415	24.728	26.0022	26.0605	25.9646	26.1984	26.251	24.5548	24.829	25.1761	24.6965	25.4995	25.7698	24.8099	24.349	25.1095	25.3953	25.8029	24.1433	26.0587	26.5392	25.1955	+	+			-0.898551	-1.15052	-0.596697	-0.461204	G_I2_G_WT;G_PP1_G_WT	proteasome subunit beta type-4, putative	PBANKA_1226500.1-p1	5	5	32.8	32.8	32.8	29.772	0	75.279	864100000
NaN	NaN	NaN	NaN	NaN	21.5596	23.4083	NaN	21.7042	22.858	23.2829	23.3207	23.2364	22.8971	23.1725	23.7605	NaN	24.6905	22.6963	25.1011	24.2386	23.701	23.1574	23.7052	23.9514	23.3512	NaN	23.8873	23.8561	NaN		+			-0.00793953	-1.15367	0.513745	0.750836	G_PP1_G_WT	early transcribed membrane protein	PBANKA_0517000.1-p1	3	3	24.3	24.3	24.3	32.858	0	37.606	205130000
NaN	NaN	NaN	NaN	NaN	23.0917	22.8127	23.3045	23.049	23.0529	NaN	NaN	22.3105	NaN	NaN	NaN	NaN	NaN	NaN	NaN	NaN	NaN	23.2314	NaN	22.9476	NaN	NaN	NaN	NaN	NaN					0.178262	0.567186	0	-0.408422		phosphatidylinositol 3- and 4-kinase, putative	PBANKA_0409300.1-p1	5	5	4.9	4.9	4.9	114.32	0	4.4434	90228000
25.9358	26.2392	25.8611	25.9117	26.1475	25.1112	25.3571	24.8456	25.268	25.1149	25.4069	25.6263	25.6318	25.5337	25.3345	26.2125	26.1243	25.8742	26.0814	25.8723	25.5468	24.9679	25.8009	25.5367	25.2752	25.6724	25.831	25.8776	25.5212	26.2776					0.512391	-0.367307	0.196976	-0.410442		ubiquitin carboxyl-terminal hydrolase 13, putative	PBANKA_0715900.1-p1	18	18	23.9	23.9	23.9	99.619	0	73.722	1083500000
NaN	NaN	NaN	NaN	NaN	25.1307	25.0139	24.667	24.9044	24.9653	25.8071	25.7523	26.1861	26.7783	25.9694	NaN	NaN	NaN	NaN	NaN	NaN	NaN	NaN	NaN	NaN	24.4129	NaN	24.4761	25.2058	NaN	+	+			-3.16697	-1.16239	-0.689273	-1.49735	G_I2_G_WT;G_PP1_G_WT	ADP-ribosylation factor GTPase-activating protein, putative	PBANKA_1457800.1-p1	6	6	32.1	32.1	32.1	33.157	0	179.59	429190000
31.113	31.0861	31.3579	30.9639	31.1129	30.1393	30.4062	30.125	29.9999	30.1387	31.3024	31.3157	31.3153	31.3763	31.357	30.3222	30.2107	30.411	30.209	30.7975	29.5351	28.2637	29.0357	28.7701	28.5662	29.4341	29.3683	29.6778	29.8506	30.4922		+			-0.206564	-1.17151	0.625475	-0.930425	G_PP1_G_WT	proliferating cell nuclear antigen 1, putative	PBANKA_1137900.1-p1	19	19	73	73	73	30.674	0	323.31	29674000000
26.7568	26.8369	26.7116	26.5831	26.9412	26.2914	26.4396	26.4464	26.3148	26.451	26.4371	26.6404	26.5281	26.349	26.5213	26.9748	26.9801	26.7222	26.7111	26.7046	26.0322	25.221	25.9213	25.6164	25.4707	26.0888	25.7458	25.9496	25.9521	26.6091					0.27072	-0.106548	0.749487	-0.416772		aconitate hydratase, putative	PBANKA_1355200.1-p1	14	14	19.1	19.1	19.1	102.86	0	48.4	1932700000
NaN	NaN	NaN	NaN	NaN	24.8056	23.9261	24.3456	24.7086	24.7047	24.3527	24.1162	23.5499	23.2708	23.9158	NaN	NaN	24.6678	24.9771	NaN	24.3329	24.0326	24.0002	NaN	NaN	24.076	23.7988	24.3705	NaN	24.4373					-0.829691	0.657049	-1.22531	-0.420462		rho GTPase-activating protein, putative	PBANKA_1205400.1-p1	6	6	12.5	12.5	12.5	60.249	0	17.445	385660000
23.1576	23.092	22.2811	NaN	23.2498	21.9682	22.0345	21.5908	21.8729	22.1701	21.9827	21.9624	22.8753	21.6951	22.1651	21.7059	NaN	21.8055	21.332	21.3491	NaN	NaN	NaN	NaN	NaN	NaN	NaN	NaN	NaN	21.9746					0.747204	-0.208772	-0.103344	-0.422039		serine/threonine protein kinase, putative	PBANKA_0407400.1-p1	3	3	2.2	2.2	2.2	200.22	0	37.306	71318000
25.9849	26.1101	25.793	25.8865	26.2152	25.7016	25.6167	25.6026	25.4682	25.6751	25.8845	25.8129	25.7889	25.4433	25.6418	26.652	26.529	26.418	26.6016	26.3058	26.3495	25.7726	26.2637	26.0315	26.1041	26.4367	26.6026	26.2594	26.2966	27.0449					0.28368	-0.101397	-0.0267437	-0.423753		pyridoxal kinase, putative	PBANKA_1230800.1-p1	10	10	38.4	38.4	38.4	37.839	0	79.862	1489400000
NaN	NaN	NaN	NaN	NaN	23.6866	24.147	22.939	23.4539	23.1144	24.0282	24.2741	24.6146	25.4185	24.8817	NaN	NaN	NaN	NaN	NaN	24.0225	NaN	NaN	23.8801	NaN	24.0988	NaN	23.8268	24.5804	NaN	+	+			-2.37428	-1.17523	-0.794648	0.0540329	G_I2_G_WT;G_PP1_G_WT	ubiquitin domain-containing protein DSK2, putative	PBANKA_0934200.1-p1	4	4	17.1	17.1	17.1	41.26	0	29.838	209280000
27.7182	27.7403	27.9411	27.6452	28.069	26.8946	27.277	26.8027	27.04	26.8867	28.2353	28.1758	28.2591	28.0477	28.1202	27.381	27.3244	27.3875	27.3736	27.4159	26.7969	26.2098	26.5405	26.6031	26.5097	26.7894	26.7332	27.3338	27.1996	27.6657		+			-0.344839	-1.18741	0.232133	-0.612352	G_PP1_G_WT	ribonucleoside-diphosphate reductase small chain, putative	PBANKA_1214200.1-p1	16	16	41.2	41.2	41.2	40.134	0	132.31	3696300000
28.3293	28.4057	28.8347	28.6839	29.2717	27.5659	27.4695	27.7474	27.6666	27.6803	28.7877	28.9771	28.7565	28.593	28.9539	28.1034	27.9632	28.4226	27.9538	28.5898	27.1336	26.2004	26.681	26.5457	26.3675	26.6352	26.7374	27.0393	27.1983	28.0101		+			-0.108559	-1.18767	1.08252	-0.538429	G_PP1_G_WT	thioredoxin reductase, putative	PBANKA_0824700.1-p1	18	18	31.5	31.5	31.5	71.4	0	228.38	5665400000
NaN	23.9713	24.0983	24.3264	24.2471	24.6042	23.7078	23.5851	24.3324	24.3256	24.3737	24.4826	24.4076	24.2142	24.1357	NaN	23.885	NaN	24.1251	24.1793	23.7241	23.0812	23.5068	23.4957	23.0576	23.5958	23.7211	23.348	23.869	24.4851					-0.482362	-0.211747	-0.749276	-0.430736		conserved Plasmodium protein, unknown function	PBANKA_1218600.1-p1	5	5	19.4	19.4	19.4	32.269	0	10.81	353790000
27.2129	27.3531	26.5424	27.357	27.3967	27.5411	27.292	27.1915	27.4887	27.3962	26.8633	27.1951	27.112	27.1576	27.098	27.1472	27.2641	27.2269	27.0609	27.4909	27.3016	26.8553	27.5194	27.2718	26.7104	27.3034	27.4608	27.5471	27.7597	27.7844					0.0872456	0.296721	-0.333075	-0.439388		CUGBP Elav-like family member 2, putative	PBANKA_1032700.1-p1	14	14	34.7	34.7	34.7	58.891	0	108.84	3540000000
NaN	NaN	NaN	NaN	NaN	22.965	23.8684	NaN	23.0255	NaN	23.687	23.7698	23.9063	24.2916	24.0129	NaN	NaN	NaN	NaN	NaN	24.0927	23.5423	24.0237	24.129	23.9862	24.5733	23.9788	24.369	24.8408	23.9002	+	+	+		-1.18033	-1.20361	-1.68834	-0.377642	G_I2_G_WT;G_PP1_G_WT;S_I2_S_WT	GrpE protein homolog, mitochondrial, putative	PBANKA_0923600.1-p1	5	5	26.7	26.7	26.7	32.886	0	11.297	195140000
NaN	NaN	23.3077	23.6939	23.174	25.9762	25.6694	25.5676	26.0534	25.422	26.6306	26.1903	27.3319	27.6298	26.939	NaN	NaN	23.1726	NaN	23.4288	25.2074	24.2461	24.6841	25.0754	25.3992	25.6381	NaN	26.2641	26.9946	23.156	+	+	+		-3.5998	-1.20658	-2.17647	0.243198	G_I2_G_WT;G_PP1_G_WT;S_I2_S_WT	heat shock protein 110, putative	PBANKA_1357200.1-p1	22	22	29.6	29.6	29.6	106.16	0	83.343	1004300000
25.7595	26.1737	26.1839	25.8427	26.6822	25.2595	25.6489	25.4653	25.5972	25.3073	26.546	26.8702	26.5655	26.4832	26.8723	26.9741	26.8107	27.3036	26.7698	27.3155	26.0732	24.7083	25.7673	25.5833	25.266	25.8382	25.7978	26.2403	26.6514	27.022		+			-0.539028	-1.21179	0.724771	-0.830344	G_PP1_G_WT	proteasome activator 28 subunit beta, putative	PBANKA_0809100.1-p1	12	12	50.4	50.4	50.4	32.812	0	128.94	1675200000
24.0196	24.407	24.0788	23.7403	24.0982	23.992	24.432	NaN	23.0299	NaN	24.1423	24.2588	24.6295	24.2666	24.3572	24.2238	NaN	24.2103	24.4305	24.3487	24.1359	23.5669	23.8104	23.9017	23.934	24.1202	24.5022	23.938	24.1492	24.7684		+			-0.262082	-1.21706	-0.313268	-0.425824	G_PP1_G_WT	SUMO-activating enzyme subunit 2, putative	PBANKA_1451600.1-p1	9	9	17	17	17	73.841	0	25.944	348930000
29.2936	29.4692	29.2381	29.1286	29.6296	28.4787	28.6902	28.5631	28.4185	28.5147	29.768	29.8325	29.712	29.8315	29.6619	26.4686	26.6914	27.097	26.819	27.4709	26.9908	26.2091	26.2091	26.3088	26.6963	27.5898	26.3551	27.8107	27.9704	27.3171		+			-0.409342	-1.22813	-0.499251	-0.925819	G_PP1_G_WT	p1/s1 nuclease, putative	PBANKA_1030600.1-p1	18	18	64.3	64.3	64.3	38.777	0	323.31	7957700000
26.4989	26.5685	26.3608	26.1752	26.7665	25.8846	25.6349	25.7747	25.5706	25.6956	26.1386	26.1237	26.4331	25.7793	25.8839	27.5054	27.5995	27.4107	27.3885	27.444	26.8728	25.8676	26.9091	26.6438	26.2237	26.6171	27.1226	26.8365	26.7303	27.5327					0.402241	-0.35964	0.501807	-0.46444		coatomer subunit zeta, putative	PBANKA_0717400.1-p1	9	9	48.4	48.4	48.4	25.251	0	323.31	2232700000
NaN	NaN	NaN	NaN	NaN	NaN	NaN	NaN	NaN	22.9692	23.6096	23.4308	23.4666	23.5981	23.6339	NaN	NaN	NaN	NaN	NaN	NaN	NaN	NaN	23.2544	23.0272	23.5157	NaN	23.4874	23.7929	23.946	+	+			-1.10837	-1.22831	-1.07299	-0.606056	G_I2_G_WT;G_PP1_G_WT	mago nashi protein homologue, putative	PBANKA_0622700.1-p1	2	2	15.5	15.5	15.5	17.601	0.0068788	1.8445	139020000
NaN	NaN	NaN	NaN	23.5117	23.0394	22.6435	23.0081	23.4501	22.9867	23.0314	23.2952	23.7685	23.3429	23.6031	NaN	NaN	NaN	23.6896	23.4704	23.8407	23.1736	24.2091	23.9409	24.0686	23.6932	24.3781	24.3279	24.2987	24.8864					-0.588205	-0.382672	-1.21354	-0.47027		conserved Plasmodium protein, unknown function	PBANKA_0808500.1-p1	3	3	38	38	38	9.5229	0	5.6402	220280000
26.9639	26.6784	26.2534	25.9447	26.7586	26.1309	25.9829	25.8264	25.7195	26.1074	25.9042	25.9352	26.1042	26.1932	26.2904	25.572	25.6684	25.6517	25.4516	25.8057	25.2709	25.2552	24.626	24.8028	24.7881	25.4739	25.1887	25.3758	25.4975	25.5841					0.434389	-0.131998	0.205932	-0.475401		merozoite TRAP-like protein	PBANKA_0512800.1-p1	13	13	27.2	27.2	27.2	66.778	0	185.66	1242800000
29.6146	29.4456	28.9449	28.8664	29.8355	28.5692	28.3377	28.3823	28.4113	28.6939	28.1407	28.4672	28.4305	28.1857	28.5021	28.9977	29.0583	29.1005	28.8106	28.5799	28.316	27.1214	27.9745	27.621	27.2392	27.6661	28.1053	27.8878	28.0389	28.9651	+				0.996144	0.133684	0.776765	-0.478203	G_I2_G_WT	succinyl-CoA synthetase alpha subunit, putative	PBANKA_0938500.1-p1	14	14	45	45	45	35.528	0	184.89	8789700000
32.0992	32.1563	32.4063	31.9654	32.6078	31.1911	31.219	31.1788	31.0811	31.0881	32.4445	32.5538	32.4793	32.1085	32.3253	30.3224	30.0877	30.6186	30.1769	31.0772	28.7007	27.2935	28.1293	27.7381	27.3525	28.2865	28.139	28.6076	28.7606	30.0419		+	+		-0.135271	-1.23061	1.68944	-0.924313	G_PP1_G_WT;S_I2_S_WT	lactate dehydrogenase, putative	PBANKA_1340400.1-p1	20	20	50.6	50.6	50.6	36.958	0	323.31	50193000000
25.35	25.3099	24.0213	25.0252	25.4932	24.8436	25.1399	24.5955	24.7213	24.5261	25.9716	26.0038	26.1312	26.0074	25.892	24.167	24.036	25.4435	24.5052	NaN	24.9044	23.7985	24.0556	24.2777	24.044	25.4091	23.5853	25.3979	25.8991	24.7174	+	+			-0.961285	-1.23594	-0.902782	-0.785699	G_I2_G_WT;G_PP1_G_WT	proteasome subunit alpha type-6, putative	PBANKA_1223100.1-p1	6	6	24.6	24.6	24.6	29.619	0	11.892	686460000
28.5254	28.6716	28.756	28.3436	28.462	27.3198	27.2448	27.1024	27.1387	27.3301	28.4692	28.3669	28.3839	28.3478	28.7515	30.1481	30.0975	29.9025	29.7317	30.1859	28.8406	26.4718	28.2528	27.393	26.7457	27.6563	27.3632	28.0826	28.8187	29.561		+	+		0.0878662	-1.23671	1.71678	-0.755574	G_PP1_G_WT;S_I2_S_WT	eukaryotic translation initiation factor 5A, putative	PBANKA_0603200.1-p1	11	11	75.2	75.2	75.2	17.554	0	136.05	8995200000
26.8714	27.0192	26.6802	26.5805	26.9453	26.2509	26.1815	25.9278	25.7964	26.2497	26.4001	26.4358	26.4926	26.2597	26.1159	27.2182	26.7747	26.7761	26.849	26.834	26.193	25.7896	26.3776	25.6572	25.7591	26.2609	26.4908	26.4785	25.9278	27.1074					0.478495	-0.259546	0.437306	-0.497765		activator of Hsp90 ATPase, putative	PBANKA_0404600.1-p1	11	11	34	34	34	41.217	0	148.57	1941400000
28.4078	28.3554	28.7651	28.2709	28.8952	27.5134	27.6299	27.3995	27.5348	27.4005	28.796	28.9239	28.6817	28.5956	28.7779	28.7806	28.6984	29.0832	28.6529	29.3255	28.2304	27.3378	27.8333	27.6826	27.6657	28.0931	27.8363	28.358	28.6096	28.8153		+			-0.216101	-1.25938	0.565647	-0.592509	G_PP1_G_WT	NADP-specific glutamate dehydrogenase, putative	PBANKA_1026200.1-p1	20	20	49.6	49.6	49.6	52.979	0	168.85	7021300000
NaN	NaN	NaN	NaN	NaN	21.9606	NaN	NaN	21.7291	NaN	21.9042	21.7445	22.1142	21.5607	22.0856	NaN	NaN	22.8889	23.7283	24.3819	23.4679	22.2953	22.2961	23.1348	23.3683	23.6813	22.1694	23.9292	24.0521	23.2595					0.759074	0.35824	-0.113287	-0.50584		conserved Plasmodium protein, unknown function	PBANKA_0519300.1-p1	6	6	14.1	14.1	14.1	63.836	0	17.546	120210000
30.0528	30.2224	29.8478	29.6716	30.1067	29.1146	29.2382	29.0686	29.1671	29.1663	29.5585	29.7515	29.5352	29.6712	29.808	29.5021	29.4267	29.3135	29.3244	29.3859	29.0863	28.4131	28.7217	28.7035	28.6579	29.24	29.1229	29.161	28.9362	29.6807					0.315392	-0.513905	0.162387	-0.511624		deoxyribose-phosphate aldolase, putative	PBANKA_0505800.1-p1	15	15	46.6	46.6	46.6	29.26	0	323.31	14283000000
29.3201	28.8043	29.0252	29.1698	29.3374	28.8626	28.7681	28.2262	28.6551	28.5688	29.7127	29.7727	29.848	30.2122	29.9161	26.8242	26.4076	27.2058	26.1815	27.4146	26.3766	25.3787	24.8209	24.8873	24.7638	26.6508	24.357	27.253	27.2776	26.3505		+			-0.760985	-1.27621	0.428932	-1.13235	G_PP1_G_WT	secreted ookinete protein, putative	PBANKA_0619200.1-p1	21	21	41.5	41.5	41.5	54.714	0	160.84	7717300000
28.4973	28.2055	28.8537	28.6514	28.6713	28.253	28.2611	27.2178	27.6093	27.6026	28.8842	28.8314	29.1389	29.4413	29.0726	27.8318	27.7712	27.8097	27.6655	28.2515	28.0385	27.3317	27.0543	27.3451	27.313	28.0736	27.3951	28.2722	28.545	28.1175		+			-0.497835	-1.28491	-0.214738	-0.664133	G_PP1_G_WT	triosephosphate isomerase, putative	PBANKA_1303800.1-p1	14	14	52	52	52	27.842	0	203.01	6157700000
32.3327	31.9279	32.0745	31.6951	32.794	30.025	30.6928	30.9759	30.6421	30.5962	32.0709	32.1868	32.0616	31.121	31.9476	32.4653	32.4052	32.4236	32.6435	32.4949	31.0632	29.8088	30.9662	30.1075	29.9126	30.7388	31.0606	30.9737	31.4209	32.5851		+			0.287263	-1.29118	1.13066	-0.984157	G_PP1_G_WT	macrophage migration inhibitory factor	PBANKA_1444000.1-p1	10	10	83.6	83.6	83.6	12.935	0	323.31	70259000000
NaN	NaN	NaN	NaN	NaN	20.6348	20.9391	20.9182	20.9637	20.5761	NaN	NaN	NaN	NaN	NaN	NaN	NaN	NaN	NaN	NaN	NaN	NaN	NaN	NaN	NaN	NaN	NaN	NaN	NaN	NaN		+			0	-1.29402	0	0	G_PP1_G_WT	conserved Plasmodium protein, unknown function	PBANKA_1302000.1-p1	3	3	0.9	0.9	0.9	516.39	0	3.8482	11939000
25.0033	26.318	24.618	25.4027	26.3268	26.081	25.5628	25.762	25.7791	25.857	25.6591	25.5404	25.7958	25.7708	26.0568	25.4068	25.5766	24.7987	24.4026	25.1248	24.6043	24.4064	24.725	25.2055	24.485	24.9522	25.3426	24.5625	25.0371	26.1249					-0.230822	0.0438084	-0.141951	-0.518601		calmodulin-like protein	PBANKA_1308100.1-p1	5	5	21.7	21.7	21.7	24.946	0	26.793	1076100000
26.2189	25.3463	26.2188	25.8668	26.2598	25.7152	25.8647	25.5689	25.6403	25.4055	26.8182	26.9522	27.0158	26.8791	27.0127	26.0197	25.8248	26.5243	25.966	26.9016	25.7187	25.2667	25.14	25.635	25.373	26.3367	24.7936	26.7526	27.0315	25.9754	+	+			-0.953463	-1.2967	0.069318	-0.75129	G_I2_G_WT;G_PP1_G_WT	inositol-3-phosphate synthase, putative	PBANKA_1111400.1-p1	14	14	27.3	27.3	27.3	69.671	0	88.103	1470500000
24.9409	24.2842	24.3956	24.9278	25.071	24.1067	23.7525	24.0078	24.3324	24.0239	25.3797	25.0558	25.4204	25.4464	25.4281	NaN	24.674	24.5626	24.8237	24.5233	24.0822	NaN	NaN	NaN	NaN	NaN	NaN	NaN	24.4294	24.2843		+			-0.62216	-1.30141	0.928144	-0.540168	G_PP1_G_WT	protein arginine N-methyltransferase 1, putative	PBANKA_1018400.1-p1	8	8	24.4	24.4	24.4	46.248	0	14.647	435880000
23.907	24.1963	23.6007	NaN	23.7312	NaN	NaN	NaN	NaN	24.0527	23.4259	23.9437	23.2445	23.2835	NaN	24.172	23.618	23.8757	23.4831	23.8584	NaN	NaN	NaN	NaN	NaN	NaN	NaN	NaN	NaN	23.4814		+			0.18793	-1.30488	1.24533	-0.402832	G_PP1_G_WT	protein phosphatase containing kelch-like domains	PBANKA_1329500.1-p1	7	7	10.3	10.3	10.3	99.675	0	24.158	252750000
27.4385	27.1885	27.6688	27.3118	28.1226	25.8921	26.1176	26.2501	26.3268	26.2597	27.56	27.6944	27.3249	27.2781	27.5706	27.3508	27.0724	27.439	27.0913	27.4443	26.112	NaN	25.7147	25.2268	25.1814	25.3993	25.7567	25.7954	26.3963	27.208		+			0.0604515	-1.31634	1.16845	-1.15984	G_PP1_G_WT	4-nitrophenylphosphatase, putative	PBANKA_1421300.1-p1	9	9	39.8	39.8	39.8	36.775	0	174.66	2538400000
25.4497	24.8434	25.6601	24.8283	25.1286	24.8646	24.7597	24.3464	24.2802	24.4656	25.8399	25.6742	26.045	26.1098	25.7601	24.7815	23.947	24.9633	24.0865	25.1464	24.3863	23.0979	23.9842	23.1688	23.5515	24.023	22.7983	24.704	25.1523	24.4145		+			-0.70376	-1.34249	0.366502	-0.580725	G_PP1_G_WT	haloacid dehalogenase-like hydrolase, putative	PBANKA_0517200.1-p1	8	8	35.1	35.1	35.1	33.548	0	115.85	597620000
29.6898	27.9542	29.6001	29.4359	28.8721	29.8174	29.8935	28.8035	29.2596	28.9452	30.5224	30.2523	30.7684	31.1881	30.7032	26.2065	26.0622	27.0493	25.9457	27.2174	27.7374	26.4369	26.0284	26.7125	26.6084	27.7365	22.4003	28.0422	28.2879	26.1783	+	+			-1.57646	-1.34306	-0.0328175	0.175682	G_I2_G_WT;G_PP1_G_WT	male development gene 1	PBANKA_1432200.1-p1	13	13	57	57	57	24.285	0	323.31	11595000000
NaN	24.5233	NaN	NaN	NaN	24.3357	24.4194	23.5346	23.8503	23.6933	24.8293	25.0219	25.5502	25.4948	25.662	NaN	NaN	NaN	NaN	NaN	24.0839	NaN	NaN	23.933	23.7873	24.5929	NaN	24.9637	25.0177	24.0261	+	+	+		-2.19255	-1.34496	-1.9064	-0.954403	G_I2_G_WT;G_PP1_G_WT;S_I2_S_WT	small ubiquitin-related modifier, putative	PBANKA_1105400.1-p1	3	3	43.4	43.4	43.4	10.842	0	35.26	322130000
27.4778	27.885	27.3794	27.2299	28.0428	26.7489	26.6033	26.6299	26.44	26.5746	27.0471	27.2601	27.1613	26.9257	26.8799	28.0578	27.8805	27.8744	28.1965	27.3552	27.8467	27.3641	27.8523	27.6124	27.745	27.9994	28.459	28.0772	27.8805	28.7879					0.548148	-0.455466	-0.367905	-0.55669		ubiquitin-conjugating enzyme E2, putative	PBANKA_1132600.1-p1	11	11	69.8	69.8	69.8	22.789	0	210.82	4103500000
25.3215	23.3909	24.9346	24.0517	24.909	24.9502	25.1637	24.1183	24.5094	24.1599	25.7937	25.451	26.2352	26.4739	25.6956	25.3892	25.3065	25.1472	24.6506	25.9245	25.3078	24.4005	24.224	24.5837	24.3312	25.0406	NaN	25.2148	25.843	23.9436	+	+			-1.40834	-1.34959	0.657725	-0.056459	G_I2_G_WT;G_PP1_G_WT	serine--tRNA ligase, putative	PBANKA_0615400.1-p1	15	15	28	28	28	61.829	0	26.879	804790000
29.4153	29.1003	29.4121	29.381	29.0839	28.871	29.0049	28.1013	28.3535	28.0971	29.7226	29.5506	29.9228	30.2852	29.7123	27.9313	27.7882	27.6432	27.8146	28.0603	27.6167	26.7546	27.3167	27.0346	26.8829	27.7527	26.8126	27.932	28.143	27.8383		+			-0.560202	-1.35313	0.151788	-0.57464	G_PP1_G_WT	tetratricopeptide repeat protein, putative	PBANKA_0604300.1-p1	23	23	52.4	52.4	52.4	38.781	0	323.31	8444800000
NaN	NaN	NaN	NaN	23.2391	NaN	NaN	NaN	NaN	NaN	23.2164	23.7064	23.7455	NaN	NaN	25.9572	25.8488	26.048	25.8507	25.9339	24.8672	24.48	24.8564	24.9223	25.0145	24.5977	24.7126	24.5271	24.5222	25.1811		+	+		-0.142712	-1.35545	1.21956	0.119942	G_PP1_G_WT;S_I2_S_WT	conserved Plasmodium protein, unknown function	PBANKA_0815400.1-p1	7	7	43	43	43	28.507	0	40.88	480600000
26.58	25.935	26.5037	26.1842	26.1617	26.3661	26.2812	25.6665	25.8851	25.7955	27.2808	27.1742	27.4727	27.5699	27.3383	25.7211	25.9623	26.2269	26.1252	26.6327	26.155	25.7136	25.6254	25.5268	25.9585	26.5882	24.6232	26.7457	27.5487	25.4075	+	+			-1.09427	-1.3683	-0.049036	-0.386784	G_I2_G_WT;G_PP1_G_WT	lysine--tRNA ligase, putative	PBANKA_1362900.1-p1	20	20	39.6	39.6	39.6	67.152	0	99.485	1783700000
27.191	26.0968	26.9786	26.9292	27.0877	26.8982	26.667	26.1462	26.482	26.3354	27.6436	27.6144	28.1086	28.1437	27.8693	26.191	25.6157	26.5499	25.6118	27.1136	26.3272	24.6968	25.5952	25.5727	25.5984	26.3124	23.7039	26.5289	27.2032	25.7384	+	+			-1.01928	-1.3702	0.319032	-0.339282	G_I2_G_WT;G_PP1_G_WT	Hsp70/Hsp90 organizing protein, putative	PBANKA_1010500.1-p1	20	20	38.6	38.6	38.6	65.644	0	66.235	2208400000
26.983	26.7012	27.3049	26.7453	27.1755	26.7154	26.8446	26.2725	26.7341	26.3534	27.8989	27.7743	27.988	28.1913	27.9449	26.419	26.4503	26.9196	26.4389	27.3889	26.7519	23.6347	25.5459	25.7578	25.9566	26.9884	23.2117	27.3221	27.7936	24.9963	+	+			-0.977478	-1.37546	0.660924	-0.533055	G_I2_G_WT;G_PP1_G_WT	asparagine--tRNA ligase, putative	PBANKA_0308600.1-p1	17	17	31.3	31.3	31.3	66.453	0	148.46	2539500000
NaN	NaN	NaN	NaN	NaN	NaN	23.8375	NaN	23.8033	NaN	23.3479	23.4015	24.3074	24.4303	23.3811	NaN	NaN	NaN	NaN	NaN	23.9986	25.1911	25.7992	25.2902	25.1132	NaN	NaN	24.0003	24.0115	23.4063		+		+	-0.943032	-1.40585	-0.873075	2.21191	G_PP1_G_WT;S_PP1_S_WT	60S ribosomal protein L26, putative	PBANKA_0410600.1-p1	3	3	24.4	24.4	24.4	14.79	0	5.5384	306600000
31.0583	31.2016	30.5995	30.9416	31.8598	28.8503	28.9217	28.9638	28.8029	28.7665	28.7687	28.984	28.7669	28.7451	28.9766	31.0552	30.6811	30.9427	31.1132	30.8276	28.2678	28.0601	28.565	28.3745	28.4701	29.0142	28.7156	28.8165	29.012	29.1165	+		+		2.28392	0.0127796	1.989	-0.587452	G_I2_G_WT;S_I2_S_WT	protein DJ-1, putative	PBANKA_1126200.1-p1	9	9	56.1	56.1	56.1	20.707	0	323.31	22210000000
29.8273	28.7475	29.6628	29.0828	29.3617	29.6525	29.5153	28.7108	29.1711	28.7562	30.4394	30.4396	30.5611	30.8064	30.5892	28.3186	28.0634	28.8872	27.9731	29.3186	29.0695	27.9925	27.6677	28.3426	28.3555	29.2922	26.5902	29.6251	30.1322	28.0959	+	+			-1.23071	-1.40594	-0.234992	-0.46157	G_I2_G_WT;G_PP1_G_WT	phosphoglycerate kinase, putative	PBANKA_0823400.1-p1	28	28	64.7	64.7	64.7	45.494	0	323.31	13965000000
27.1077	27.5436	26.8906	27.2055	27.4263	24.9698	24.5101	24.7777	25.4363	24.5423	26.7078	26.4205	26.7588	25.9947	25.3891	23.9024	24.311	24.3561	23.8858	23.9838	NaN	NaN	NaN	NaN	NaN	24.059	23.6067	NaN	NaN	24.8942	+	+			0.980538	-1.40698	0.776811	-1.04326	G_I2_G_WT;G_PP1_G_WT	TPH domain-containing protein, putative	PBANKA_1129600.1-p1	10	10	16.4	16.4	16.4	46.665	0	14.952	955560000
NaN	NaN	23.6433	NaN	24.7944	NaN	NaN	23.4596	NaN	NaN	23.9585	24.276	24.0343	23.9841	23.9808	24.8127	24.8149	25.6388	24.6976	25.431	NaN	NaN	23.5933	NaN	NaN	NaN	NaN	NaN	22.9279	24.2633		+	+		-0.57746	-1.40765	2.39983	-0.275654	G_PP1_G_WT;S_I2_S_WT	UVB-resistance protein UVR8 homologue, putative	PBANKA_0911300.1-p1	7	7	21.4	21.4	21.4	47.909	0	27.65	260950000
28.5767	28.5402	28.4171	28.5724	28.5894	28.1089	28.0921	27.9087	28.0201	28.0317	28.5561	28.5991	28.616	28.5991	28.4672	27.879	27.87	27.964	27.6873	28.0706	27.5519	26.4849	27.093	26.9273	26.7108	27.4273	27.1834	27.5266	27.5891	28.0399					-0.0283848	-0.535206	0.340914	-0.599694		cysteine--tRNA ligase, putative	PBANKA_1213600.1-p1	24	24	41.8	41.8	41.8	78.377	0	144.95	5562800000
24.5789	24.1668	24.3898	25.0821	24.9933	25.0901	25.0426	24.0897	25.1143	24.148	26.0104	25.9132	26.2918	26.4073	25.9343	NaN	NaN	23.5121	NaN	24.0085	23.3377	22.9754	23.2006	23.2714	23.4437	NaN	NaN	24.0288	24.3619	NaN	+	+			-1.46925	-1.41446	0.14288	0.539293	G_I2_G_WT;G_PP1_G_WT	CRAL/TRIO domain-containing protein, putative	PBANKA_0920800.1-p1	8	8	30.4	30.4	30.4	35.239	0	161.9	522040000
NaN	NaN	NaN	NaN	NaN	24.7756	24.2308	24.4805	24.6549	24.5653	24.15	24.5204	24.7745	24.4916	24.6119	NaN	NaN	NaN	NaN	NaN	23.9901	NaN	NaN	NaN	NaN	NaN	NaN	NaN	NaN	NaN	+				-2.06829	0.0317326	0	-0.604759	G_I2_G_WT	conserved Plasmodium protein, unknown function	PBANKA_1144800.1-p1	4	4	8.3	8.3	8.3	42.418	0	5.2035	250240000
27.8436	27.4753	28.1819	27.5709	27.4822	27.6649	27.7811	26.9093	27.095	27.0755	28.6036	28.7118	28.8003	28.773	28.7301	28.4802	28.479	28.9852	28.0815	29.3938	29.005	29.1277	28.4068	28.5599	29.1185	30.5083	29.3897	30.496	30.4813	29.2297	+	+		+	-1.01299	-1.4186	-1.33706	-1.17743	G_I2_G_WT;G_PP1_G_WT;S_PP1_S_WT	hypoxanthine-guanine phosphoribosyltransferase, putative	PBANKA_1210800.1-p1	12	12	52.8	52.8	52.8	26.525	0	268.57	8641500000
NaN	NaN	NaN	NaN	NaN	NaN	NaN	NaN	NaN	NaN	24.3866	24.1948	23.9376	23.6624	NaN	27.0405	26.5698	26.2006	26.519	27.3413	27.162	26.8854	27.6251	27.031	27.0416	26.6317	26.4269	26.1603	26.4442	26.8664	+	+			-1.24702	-1.42094	0.228346	0.643092	G_I2_G_WT;G_PP1_G_WT	conserved Plasmodium protein, unknown function	PBANKA_0707700.1-p1	21	21	30.6	30.6	30.6	131.94	0	323.31	1256400000
28.9449	28.7517	28.9568	28.5119	29.2685	27.4835	27.6437	27.5543	27.5653	27.5807	29.1039	29.2944	28.9284	28.7639	28.8866	28.9665	28.6288	28.9547	28.7212	29.3205	27.6792	26.5323	27.4145	27.1646	26.7703	27.2483	27.3903	27.4822	27.7648	28.7512		+			-0.108658	-1.42993	1.19099	-0.61518	G_PP1_G_WT	adenylosuccinate synthetase, putative	PBANKA_1131100.1-p1	20	20	40.5	40.5	40.5	50.037	0	175.61	7209700000
NaN	23.9804	NaN	NaN	22.7986	24.0716	23.5285	NaN	23.4615	23.8353	24.5226	24.5088	24.8411	24.9216	24.5392	27.0134	26.7933	27.2715	27.2988	27.108	26.6109	25.5141	27.04	26.5117	26.7208	26.1279	27.1758	26.4933	27.3863	27.0599	+	+			-1.92439	-1.42998	0.248335	-0.369162	G_I2_G_WT;G_PP1_G_WT	translocon component PTEX150	PBANKA_1008500.1-p1	24	24	45.3	45.3	45.3	101.95	0	323.31	1394500000
28.7551	28.8764	28.5238	28.4994	29.2364	28.4122	28.2225	28.3092	28.1402	28.0546	28.8246	28.9467	28.7523	28.6379	28.7975	29.0989	28.7518	28.9567	28.7788	29.1557	28.1103	26.9391	27.9451	27.4155	27.2868	27.4525	27.5415	28.059	28.5007	29.2479					-0.0135792	-0.564088	0.788065	-0.620958		rab specific GDP dissociation inhibitor, putative	PBANKA_1456200.1-p1	21	21	55.7	55.7	55.7	52.035	0	323.31	7919200000
28.9977	28.9666	28.6023	28.8865	28.676	29.5125	29.3165	29.4471	29.3536	29.3505	29.1688	29.2315	29.3546	29.5316	29.1149	28.1571	28.0183	28.0985	28.3464	28.5104	28.6484	28.5523	28.9812	29.0474	29.0102	29.4775	29.7453	29.2215	29.3632	29.6073			+		-0.454449	0.115755	-1.25682	-0.635061	S_I2_S_WT	cell division cycle protein 48 homologue, putative	PBANKA_1118600.1-p1	39	38	51.7	51.7	49.6	90.838	0	323.31	12177000000
27.8029	27.8212	27.5956	27.6407	27.9413	27.5174	27.3807	27.0773	27.2422	27.1083	27.7844	27.8064	27.9029	27.9755	27.7343	26.8332	26.611	26.3664	26.7933	27.0079	26.5826	26.053	26.4646	26.5918	26.3998	27.2826	26.8508	26.9271	26.8449	27.3709					-0.0803444	-0.575494	-0.332894	-0.63689		proliferating cell nuclear antigen 2, putative	PBANKA_1441400.1-p1	8	8	34.5	34.5	34.5	30.317	0	84.738	3418600000
25.741	25.5267	26.2002	26.1812	25.9008	26.1877	25.3066	24.8212	25.5185	24.7533	26.4233	26.689	26.9704	27.1935	26.4881	NaN	NaN	23.8777	23.753	24.4093	NaN	23.7248	23.6681	23.7888	23.9422	24.0322	NaN	23.9138	23.7982	NaN	+	+			-0.842877	-1.43539	-0.111084	-0.316928	G_I2_G_WT;G_PP1_G_WT	nucleic acid binding protein, putative	PBANKA_0916100.1-p1	7	7	39.9	39.9	39.9	31.772	0	31.39	797310000
25.2932	25.2746	26.028	24.9174	25.7572	24.3128	24.5666	24.2867	24.4184	24.3778	24.9428	24.7219	24.9615	25.1375	24.6414	26.3134	25.9534	26.0112	25.9457	26.5949	24.1346	NaN	23.4122	23.6531	23.2194	24.3022	NaN	24.3057	24.2692	24.2588			+		0.573046	-0.488589	2.32118	-0.646867	S_I2_S_WT	tyrosine--tRNA ligase, putative	PBANKA_1222800.1-p1	8	8	18.8	18.8	18.8	43.347	0	29.151	753820000
NaN	NaN	NaN	NaN	24.7018	24.727	24.1825	24.2518	24.805	24.1898	25.8431	25.7639	26.0009	26.0987	25.6461	NaN	NaN	NaN	NaN	NaN	NaN	23.5591	24.1256	NaN	23.9451	NaN	NaN	NaN	25.2852	NaN	+	+			-2.94948	-1.43934	-0.488056	0.521551	G_I2_G_WT;G_PP1_G_WT	hexose transporter	PBANKA_0302500.1-p1	4	4	10.9	10.9	10.9	56.385	0	51.899	441010000
NaN	23.2318	NaN	NaN	23.9661	NaN	NaN	NaN	24.4505	23.6069	NaN	24.0605	24.1319	24.2823	24.2098	23.5616	23.3867	23.6135	24.6132	NaN	25.2539	26.5856	26.8091	26.4673	26.7447	NaN	NaN	NaN	22.5733	25.1063		+		+	-0.643585	-1.4547	1.15126	4.15049	G_PP1_G_WT;S_PP1_S_WT	60S ribosomal protein L19, putative	PBANKA_1229200.1-p1	3	3	18.9	18.9	18.9	21.596	0	5.9415	625960000
25.6669	25.1553	25.31	25.4894	25.0503	25.1337	25.0593	24.9933	25.0919	24.6258	26.1617	26.6481	26.6535	26.4681	26.2959	25.1033	25.0844	25.3624	24.7819	25.942	25.1801	24.4641	24.3564	24.7352	24.9431	25.6118	23.5984	26.0296	26.4506	24.7745	+	+			-1.11109	-1.46466	-0.0382069	-0.557212	G_I2_G_WT;G_PP1_G_WT	proteasome subunit alpha type-3, putative	PBANKA_0808200.1-p1	6	6	31.2	31.2	31.2	28.728	0	84.442	948550000
NaN	NaN	NaN	NaN	NaN	23.6601	24.3108	NaN	23.2737	NaN	24.5072	24.1681	24.7863	24.6775	24.3272	NaN	NaN	NaN	NaN	NaN	24.2798	NaN	24.5101	NaN	NaN	24.8316	NaN	25.196	25.6664	NaN	+	+			-1.83421	-1.47163	-1.66911	-1.20883	G_I2_G_WT;G_PP1_G_WT	tryptophan-rich protein	PBANKA_0623100.1-p1	8	8	17.9	17.9	17.9	93.143	0	11.618	196910000
NaN	NaN	NaN	NaN	NaN	23.8267	23.3992	24.0541	23.6961	23.823	23.6459	23.6204	23.5335	23.8564	23.6367	NaN	NaN	NaN	NaN	NaN	NaN	23.4756	NaN	23.8091	23.4763	23.4901	NaN	23.4994	24.1637	23.7568	+				-0.960948	0.101238	-1.1758	-0.671344	G_I2_G_WT	nascent polypeptide-associated complex subunit alpha, putative	PBANKA_1120700.1-p1	5	5	41.1	41.1	41.1	20.82	0	38.373	191620000
NaN	NaN	NaN	NaN	NaN	23.8366	23.8408	23.5261	NaN	23.7359	23.8077	23.6667	23.6342	23.8747	23.732	NaN	NaN	NaN	NaN	NaN	NaN	NaN	NaN	NaN	NaN	NaN	NaN	NaN	23.8305	NaN	+				-1.31206	-0.390776	0.0791901	-0.676776	G_I2_G_WT	conserved Plasmodium protein, unknown function	PBANKA_0618600.1-p1	4	4	19.1	19.1	19.1	27.566	0	7.6087	141610000
24.8839	24.9273	25.5544	25.9511	26.3359	25.3382	26.0696	24.6056	24.8772	24.7456	26.6581	26.2236	26.8471	26.7607	26.5352	NaN	NaN	24.5777	23.7919	23.3449	24.238	NaN	23.1914	23.602	23.3806	NaN	NaN	24.3416	25.2164	NaN	+	+			-1.07442	-1.47771	0.102914	0.323919	G_I2_G_WT;G_PP1_G_WT	GMP synthase [glutamine-hydrolyzing], putative	PBANKA_1211000.1-p1	12	12	24.4	24.4	24.4	62.69	0	92.921	765310000
24.7171	25.01	24.6696	24.3217	24.9371	24.4569	24.2307	24.3419	23.8446	23.8646	25.5995	25.5194	25.2987	25.6981	26.0128	25.211	25.0816	26.1816	24.5953	26.0357	24.9642	23.3324	NaN	NaN	23.5412	24.1715	24.0719	24.3248	25.4427	24.423	+	+		+	-0.894623	-1.47797	0.934234	-1.55662	G_I2_G_WT;G_PP1_G_WT;S_PP1_S_WT	ubiquitin-conjugating enzyme E2 N, putative	PBANKA_1241900.1-p1	7	5	64.9	64.9	58.3	17.205	0	21.854	602350000
NaN	NaN	NaN	NaN	NaN	24.4661	23.9967	24.2415	24.2055	24.2157	23.9597	24.0103	24.128	24.0711	24.0737	NaN	NaN	NaN	NaN	NaN	23.6243	NaN	NaN	NaN	24.0256	NaN	23.458	23.6828	23.944	24.0347	+				-2.09163	0.17653	-1.01936	-0.707978	G_I2_G_WT	phosducin-like protein, putative	PBANKA_1231200.1-p1	7	7	23.8	23.8	23.8	36.66	0	27.512	224770000
33.4427	33.5933	33.3362	33.0517	33.6173	33.1485	33.2271	33.2269	33.2022	33.1539	33.5184	33.624	33.4233	33.475	33.5607	33.0789	32.6442	32.9961	32.8115	33.2931	32.3542	31.5767	32.1661	31.9817	31.6236	32.341	32.0948	32.7096	32.9464	33.1545					-0.112012	-0.328548	0.315489	-0.708804		glyceraldehyde-3-phosphate dehydrogenase	PBANKA_1326400.1-p1	28	28	76.3	76.3	76.3	36.582	0	323.31	191110000000
27.2991	26.6188	26.941	26.7464	27.5302	27.0139	27.0218	26.5391	26.7387	26.522	27.983	28.265	28.3927	28.4778	28.1107	26.5556	26.1739	26.6302	26.3587	27.2338	26.2532	23.6356	24.6496	24.5859	22.9882	26.124	NaN	26.7334	27.2247	26.6179	+	+			-1.21876	-1.47876	0.855554	-1.31237	G_I2_G_WT;G_PP1_G_WT	bergheilysin	PBANKA_1137000.1-p1	36	36	39.8	39.8	39.8	133.53	0	294.36	2608700000
35.3868	35.3127	34.7582	34.4543	34.8431	33.4334	34.2888	33.9939	33.634	33.7122	35.6723	35.7786	35.4329	34.6631	34.9299	34.5715	35.0643	34.6102	35.6257	34.2052	34.8941	34.9801	35.3272	34.8296	34.9835	36.3203	36.8753	36.6765	36.2401	36.5246		+	+	+	-0.344358	-1.48291	-1.712	-1.52446	G_PP1_G_WT;S_I2_S_WT;S_PP1_S_WT	kelch protein K13, putative	PBANKA_1356700.1-p1	76	76	78.7	78.7	78.7	85.048	0	323.31	784410000000
NaN	NaN	NaN	NaN	NaN	24.0901	24.3139	23.6426	NaN	23.4715	24.8683	24.448	25.2877	25.6929	24.7051	NaN	NaN	NaN	NaN	NaN	NaN	23.4527	NaN	NaN	NaN	NaN	NaN	24.3919	24.3472	23.5637	+	+			-2.27469	-1.50175	-0.621224	-0.963728	G_I2_G_WT;G_PP1_G_WT	2-oxoisovalerate dehydrogenase subunit alpha, mitochondrial	PBANKA_1411100.1-p1	6	6	21.1	21.1	21.1	49.859	0	24.019	190770000
26.0272	25.9952	25.0628	25.3428	26.0116	24.3266	NaN	NaN	23.6717	NaN	23.779	24.2129	24.6769	24.2587	24.0548	23.628	24.1499	23.9792	23.8114	23.6017	NaN	NaN	NaN	NaN	23.0455	NaN	23.0533	NaN	NaN	23.1784	+	+	+		1.49146	-1.50447	1.32687	-0.500374	G_I2_G_WT;G_PP1_G_WT;S_I2_S_WT	conserved Plasmodium protein, unknown function	PBANKA_1344200.1-p1	4	4	11.5	11.5	11.5	33.912	0	11.485	335860000
NaN	NaN	NaN	NaN	NaN	23.5589	23.531	23.6289	23.5132	23.6081	23.3367	23.8265	23.4918	23.6927	23.6214	24.485	NaN	NaN	24.0633	NaN	23.6832	NaN	23.5215	NaN	23.3815	23.4077	23.7449	23.3637	23.4639	24.0597	+				-1.17979	-0.0258259	-0.492336	-0.75187	G_I2_G_WT	conserved Plasmodium protein, unknown function	PBANKA_0618400.1-p1	5	5	22.2	22.2	22.2	23.746	0	7.3075	214320000
26.3123	26.8224	26.5158	26.5872	27.3876	25.3741	25.3372	25.6411	25.6686	25.7674	27.194	27.1815	27.14	26.8601	27.0573	26.3696	26.3961	26.714	26.3739	27.0442	24.9412	NaN	24.9759	24.7423	24.1568	24.6073	25.3814	25.0943	25.864	26.7436		+			-0.361523	-1.52893	1.04147	-1.15892	G_PP1_G_WT	pyridoxine biosynthesis protein PDX1, putative	PBANKA_1120200.1-p1	12	12	45.8	45.8	45.8	32.689	0	65	1602200000
27.6672	26.9061	27.5545	27.6939	27.8638	27.8674	27.7584	27.0108	27.313	26.9657	28.6635	28.5732	28.9594	29.2789	29.1003	27.213	26.3931	27.5726	26.9371	27.8168	28.0252	26.8295	26.5592	27.2992	27.3521	28.4068	26.4163	28.6938	29.1014	27.4618	+	+			-1.37798	-1.53202	-0.829484	-0.802942	G_I2_G_WT;G_PP1_G_WT	peptidyl-prolyl cis-trans isomerase, putative	PBANKA_1216500.1-p1	5	5	29.4	29.4	29.4	18.818	0	35.202	4884300000
27.4428	27.5128	27.1829	27.0177	28.0164	26.8326	26.7064	26.7763	26.4595	26.6559	26.9355	27.0494	27.3792	26.6088	27.479	27.8335	27.5994	27.8482	27.6692	28.2021	26.5685	25.3895	26.5532	26.0209	25.8005	26.1973	26.711	26.24	27.1221	27.8567					0.34414	-0.404239	1.00505	-0.758902		vacuolar protein sorting-associated protein 29, putative	PBANKA_1035500.1-p1	9	9	57.6	57.6	57.6	21.541	0	44.321	3352700000
24.7197	25.0067	24.2961	NaN	24.565	23.4237	24.0494	23.0367	22.8895	23.0978	24.3953	23.673	24.7441	23.79	23.1942	25.0641	24.2745	25.3691	25.4252	24.3368	25.7515	25.5934	25.9279	26.2838	26.216	26.5889	26.9495	26.7705	26.4084	26.864			+		0.38328	-0.659927	-1.8223	-0.761713	S_I2_S_WT	choline kinase	PBANKA_1040100.1-p1	10	10	30.2	30.2	30.2	52.181	0	94.476	783480000
NaN	NaN	NaN	NaN	NaN	NaN	NaN	NaN	NaN	NaN	23.6572	23.5686	23.4292	23.3962	23.3407	NaN	NaN	NaN	NaN	NaN	NaN	NaN	NaN	NaN	NaN	NaN	NaN	NaN	NaN	23.6095	+	+			-0.88508	-1.5355	0.158956	-0.906913	G_I2_G_WT;G_PP1_G_WT	tRNA (adenine(58)-N(1))-methyltransferase catalytic subun	PBANKA_1414200.1-p1	2	2	7.5	7.5	7.5	37.284	0.00096061	2.7776	89414000
27.8121	26.4106	27.681	27.3118	26.9494	27.0052	27.6785	26.3823	26.793	26.3278	28.1756	27.978	28.4816	28.8573	28.507	26.2084	26.3193	27.3425	25.7768	27.1206	27.0998	26.476	25.6759	26.9151	26.8852	27.1844	24.3342	27.4212	27.5427	25.4916	+	+			-1.16692	-1.56254	0.158699	0.21558	G_I2_G_WT;G_PP1_G_WT	thioredoxin 1, putative	PBANKA_1320900.1-p1	6	6	48.1	48.1	48.1	11.638	0	254.43	3415400000
NaN	24.3164	NaN	NaN	24.01	24.582	24.3045	24.1805	24.3504	NaN	25.4122	25.4795	25.8699	26.0872	25.1333	24.859	25.5224	25.3615	25.1803	26.4194	26.4829	25.5073	25.5877	26.2525	26.1359	27.5747	25.5699	27.2896	27.9657	25.7945	+	+			-2.41625	-1.59142	-1.37035	-0.845613	G_I2_G_WT;G_PP1_G_WT	merozoite surface protein 8	PBANKA_1102200.1-p1	7	7	24.4	24.4	24.4	46.737	0	59.41	988980000
NaN	NaN	NaN	NaN	NaN	NaN	22.6354	NaN	NaN	NaN	23.0726	22.5706	23.6889	23.4096	23.1446	NaN	NaN	NaN	NaN	NaN	NaN	NaN	NaN	NaN	NaN	NaN	NaN	NaN	23.4874	NaN					-0.937666	-0.461793	0.137644	-0.7722		Plasmodium exported protein, unknown function	PBANKA_0316200.1-p1	3	3	2.5	2.5	2.5	206.26	0	5.1284	49782000
NaN	NaN	NaN	NaN	NaN	NaN	NaN	NaN	NaN	NaN	23.4916	23.4961	24.3103	23.7746	23.5975	NaN	NaN	NaN	NaN	NaN	NaN	NaN	NaN	NaN	NaN	NaN	NaN	NaN	NaN	NaN	+	+			-1.11883	-1.60239	0	0	G_I2_G_WT;G_PP1_G_WT	protein disulfide isomerase, putative	PBANKA_0820300.1-p1	4	4	12.4	12.4	12.4	60.025	0	4.0131	43552000
30.0926	28.5453	29.904	29.81	29.3506	29.9448	30.1894	29.1586	29.491	29.1634	31.0576	30.9551	31.0987	31.5919	31.2591	28.2484	28.0686	28.9842	27.9601	29.303	29.6863	28.7024	28.2492	29.1168	29.0694	30.2479	27.4697	30.5592	30.9981	28.5064	+	+			-1.652	-1.60305	-1.04339	-0.591433	G_I2_G_WT;G_PP1_G_WT	enolase, putative	PBANKA_1214300.1-p1	26	24	60.8	60.8	55.8	49.026	0	323.31	19665000000
23.6098	23.5536	23.461	23.5262	23.692	NaN	23.0983	22.6609	NaN	23.075	23.8028	23.937	24.066	24.1105	24.1102	23.785	23.6229	23.7	23.8674	23.7607	23.9943	22.4211	NaN	NaN	NaN	23.8122	23.6661	23.2744	24.0418	24.4866		+		+	-0.436796	-1.60423	-0.109039	-1.25038	G_PP1_G_WT;S_PP1_S_WT	SUMO-activating enzyme subunit 1, putative	PBANKA_0904500.1-p1	5	5	15.3	15.3	15.3	42.778	0	7.6739	198860000
25.5906	25.1029	25.028	25.5684	25.5205	24.0806	24.4181	24.0903	24.2987	24.301	25.8202	25.791	25.7431	25.9551	25.9246	24.9204	24.4983	24.9278	24.5243	25.5737	24.5723	NaN	24.0568	24.3367	24.1517	24.5437	NaN	25.2408	25.7161	24.2852		+			-0.484741	-1.60908	0.261003	-0.7928	G_PP1_G_WT	proteasome subunit beta type-3, putative	PBANKA_0205400.1-p1	4	4	24.3	24.3	24.3	24.509	0	43.57	620530000
24.7746	24.9788	25.3752	24.4895	25.7704	24.0189	24.0686	24.6196	24.2809	24.2134	25.8473	26.1584	25.8741	25.4829	25.9352	25.8178	25.0068	25.8208	25.8466	26.2048	24.3187	23.3328	23.9656	23.6187	23.4074	24.0205	24.0133	24.2853	24.9827	25.8262		+			-0.781878	-1.61928	1.11375	-0.896935	G_PP1_G_WT	conserved protein, unknown function	PBANKA_0208600.1-p1	7	7	24.9	24.9	24.9	32.328	0	36.5	723530000
24.2165	NaN	23.9668	NaN	24.5691	22.9435	NaN	NaN	22.9406	22.8425	22.922	23.5605	22.946	22.68	23.3857	25.6047	NaN	24.8039	25.3397	25.068	23.969	23.7566	23.1987	23.0566	24.1771	24.3765	24.3609	24.5429	24.4553	24.5179					0.126552	-0.708236	0.296669	-0.819078		aspartate aminotransferase, putative	PBANKA_0302300.1-p1	9	9	27.1	27.1	27.1	47.426	0	13.161	320940000
26.988	25.209	26.0542	25.8569	25.8074	26.9446	26.8761	26.0924	26.4482	25.8834	27.7359	27.6615	27.7621	28.8722	28.3563	24.8183	24.4566	25.8249	24.5996	26.5483	25.9342	24.6874	24.3027	25.4197	25.2352	26.4604	22.953	27.0576	27.4901	24.0661	+	+			-2.09445	-1.62864	-0.355908	-0.4896	G_I2_G_WT;G_PP1_G_WT	peptidyl-prolyl cis-trans isomerase, putative	PBANKA_0932200.1-p1	8	8	51.6	51.6	51.6	21.21	0	66.552	2095300000
25.1712	23.4596	24.371	23.9921	24.8881	24.3072	24.7394	23.3888	24.2271	23.7083	25.2467	25.5736	25.8286	26.1062	25.8082	NaN	NaN	23.5834	NaN	24.2641	23.7536	NaN	22.8022	NaN	23.2554	NaN	NaN	24.3267	24.7761	NaN	+	+			-1.33625	-1.63849	-0.141161	-0.383299	G_I2_G_WT;G_PP1_G_WT	M18 aspartyl aminopeptidase, putative	PBANKA_0833100.1-p1	9	9	23.7	23.7	23.7	56.368	0	51.362	371830000
27.9645	28.3873	26.2336	27.9114	27.7959	25.071	25.9227	25.8917	25.9604	26.5822	25.7802	26.3362	26.2566	25.5598	25.7718	23.8957	24.4803	23.6211	23.8006	23.8001	24.3402	21.8743	24.1258	23.847	23.9142	23.4669	22.9909	25.2018	24.8367	25.7575	+				1.7176	-0.0553417	-0.531227	-0.830457	G_I2_G_WT	G-protein coupled receptor, putative	PBANKA_1240200.1-p1	14	14	29.5	29.5	29.5	55.42	0	151.13	1471300000
NaN	NaN	NaN	NaN	23.9927	NaN	NaN	NaN	23.184	23.4526	23.7661	23.7267	24.095	24.1041	24.0757	NaN	NaN	NaN	NaN	23.3766	NaN	NaN	NaN	NaN	NaN	NaN	NaN	NaN	NaN	23.7828		+			-0.756476	-1.64159	-0.256899	-0.953106	G_PP1_G_WT	cytochrome b5, putative	PBANKA_1447000.1-p1	5	5	39.1	39.1	39.1	17.541	0	12.951	120360000
26.0684	26.1297	25.1706	25.9753	26.0629	25.1509	25.4314	25.3479	24.9858	25.2481	25.6891	25.56	25.8289	25.2614	25.2103	25.1858	25.0434	24.6895	24.717	24.5591	24.8615	NaN	23.9054	24.4367	24.6325	25.5029	24.6928	24.7078	24.2911	25.1062					0.371458	-0.277114	-0.0212196	-0.852571		conserved Plasmodium protein, unknown function	PBANKA_0620800.1-p1	12	12	28.3	28.3	28.3	63.731	0	67.312	784670000
NaN	NaN	23.3469	NaN	25.014	NaN	NaN	NaN	23.3778	NaN	23.9261	23.5361	23.92	23.1699	24.004	24.757	24.619	24.9752	24.8306	24.2274	23.9109	NaN	24.1044	23.9774	24.6123	23.9131	NaN	24.142	24.5638	24.6444		+			-0.196595	-1.64417	0.655632	-0.154204	G_PP1_G_WT	plasmoredoxin	PBANKA_0402200.1-p1	5	5	32	32	32	20.918	0	34.489	314700000
NaN	NaN	NaN	NaN	24.3697	NaN	NaN	24.3351	24.1617	24.5141	24.7772	24.7821	25.119	25.2599	24.8961	23.7295	NaN	24.2107	NaN	24.4234	NaN	NaN	NaN	NaN	NaN	NaN	NaN	NaN	23.4499	NaN	+	+			-1.90401	-1.65975	0.81884	-0.741455	G_I2_G_WT;G_PP1_G_WT	conserved Plasmodium protein, unknown function	PBANKA_0931100.1-p1	3	3	15.1	15.1	15.1	24.779	0	13.769	316470000
24.3861	24.1599	24.3788	24.1587	24.0601	23.6172	23.8336	NaN	NaN	23.5669	24.8436	24.8146	24.5687	24.7763	24.4632	NaN	NaN	NaN	NaN	NaN	NaN	NaN	NaN	NaN	NaN	NaN	NaN	NaN	23.4806	23.7164		+			-0.464561	-1.66348	-0.240079	-0.685932	G_PP1_G_WT	conserved Plasmodium protein, unknown function	PBANKA_1452000.1-p1	7	7	17.9	17.9	17.9	47.08	0	7.4723	190710000
NaN	NaN	NaN	NaN	NaN	NaN	NaN	NaN	NaN	NaN	23.6553	23.7064	24.0818	24.5401	24.1762	NaN	NaN	NaN	NaN	NaN	23.011	NaN	NaN	24.0313	NaN	24.2541	NaN	24.213	24.549	NaN	+	+			-1.72612	-1.67239	-0.967086	-0.396164	G_I2_G_WT;G_PP1_G_WT	conserved Plasmodium protein, unknown function	PBANKA_1037300.1-p1	5	5	29.8	29.8	29.8	34.085	0	12.128	116380000
26.8082	NaN	26.5858	26.5682	25.7686	25.6258	26.0152	24.1952	24.9834	24.6695	26.5488	26.3071	27.1832	27.2164	26.732	23.683	NaN	24.9042	23.6953	25.627	24.4396	23.9876	NaN	24.0038	23.534	25.2271	NaN	25.2804	25.31	22.829		+			-1.11698	-1.69967	-0.276926	-0.3458	G_PP1_G_WT	nucleoside diphosphate kinase b, putative	PBANKA_1142400.1-p1	9	9	62.4	62.4	62.4	17.124	0	85.572	985210000
27.4686	25.8843	26.978	26.9001	26.483	26.1892	26.9876	25.3695	25.8482	25.8411	27.43	27.3048	27.8164	28.4396	27.983	25.9426	23.8366	24.613	25.2457	25.0155	NaN	NaN	NaN	23.6087	NaN	NaN	NaN	25.2333	NaN	NaN	+	+	+		-1.05196	-1.74763	2.61955	0.265444	G_I2_G_WT;G_PP1_G_WT;S_I2_S_WT	gamete egress and sporozoite traversal protein	PBANKA_1312700.1-p1	7	7	28.1	28.1	28.1	28.796	0	62.206	1581600000
27.7037	26.1961	27.7384	27.3268	26.7412	27.3866	27.5899	26.3212	26.9425	26.4798	28.525	28.5787	28.7157	29.0792	28.7383	24.9365	24.2633	26.3413	24.5564	26.8811	26.7618	25.7123	24.9336	26.0782	26.2256	27.3376	NaN	27.8859	28.3725	25.0178	+	+			-1.58614	-1.78339	-0.91662	-0.370057	G_I2_G_WT;G_PP1_G_WT	haloacid dehalogenase-like hydrolase, putative	PBANKA_1441100.1-p1	15	15	53.5	53.5	53.5	32.773	0	124.1	3234000000
24.4967	25.0956	24.3643	25.218	24.6578	24.6433	24.4319	24.3301	24.434	24.3408	NaN	24.7086	24.4703	24.0503	23.8765	25.3102	25.2924	25.0309	25.5798	24.597	25.6477	25.7355	25.9363	25.8996	26.1065	26.22	26.9233	26.9873	26.6079	27.2026			+		0.923717	0.593254	-1.62617	-0.923106	S_I2_S_WT	EF-hand calcium-binding domain-containing protein, putative	PBANKA_0509200.1-p1	11	11	20.7	20.7	20.7	102.68	0	139.16	846440000
NaN	NaN	NaN	NaN	NaN	24.1462	24.6326	NaN	23.8361	NaN	25.1536	24.9868	25.0753	25.7386	25.0383	NaN	NaN	NaN	NaN	NaN	24.4301	NaN	NaN	NaN	24.038	NaN	NaN	24.8924	25.1689	NaN	+	+			-3.06345	-1.80682	-0.756832	0.0589039	G_I2_G_WT;G_PP1_G_WT	10 kDa chaperonin, putative	PBANKA_1431050.1-p1	4	4	52.9	52.9	52.9	10.998	0	10.998	256400000
NaN	NaN	NaN	NaN	NaN	NaN	NaN	NaN	NaN	NaN	23.8483	23.5941	23.8283	24.397	23.997	NaN	NaN	NaN	NaN	NaN	NaN	NaN	NaN	NaN	NaN	NaN	NaN	NaN	24.2632	NaN	+	+			-1.67223	-1.8108	0.297425	-0.374549	G_I2_G_WT;G_PP1_G_WT	glutathione reductase, putative	PBANKA_1023400.1-p1	6	6	20.1	20.1	20.1	56.513	0	19.554	69494000
29.3862	27.9277	29.1155	28.6324	28.2074	28.7011	28.9694	27.3121	28.1547	27.692	29.5615	29.5163	30.2663	30.5265	30.0584	25.4929	25.8445	27.0984	25.9069	27.3913	27.3474	26.0172	25.5876	26.3534	26.2453	27.7558	20.3258	28.0964	28.3937	25.7595	+	+			-1.33198	-1.81993	0.280557	0.243937	G_I2_G_WT;G_PP1_G_WT	leucine-rich repeat protein	PBANKA_1016700.1-p1	17	17	39.8	39.8	39.8	32.727	0	323.31	7042100000
27.5024	29.5317	23.4963	NaN	27.7196	23.9496	24.7595	22.2784	24.8118	24.5958	24.5336	25.0247	28.2245	25.977	25.8121	26.5379	26.3069	22.1936	23.5738	23.8845	26.286	25.8091	25.4836	25.5116	25.2141	24.5587	NaN	24.8532	25.5015	21.3176		+		+	0.134011	-1.83536	0.819212	1.98077	G_PP1_G_WT;S_PP1_S_WT	conserved Plasmodium protein, unknown function	PBANKA_1305000.1-p1	11	11	32.6	32.6	32.6	26.52	0	323.31	1527300000
NaN	NaN	NaN	NaN	23.4504	NaN	24.7492	NaN	NaN	NaN	24.7451	24.3786	25.331	25.0285	NaN	25.2268	24.4914	25.2511	27.5728	25.2251	26.071	26.0152	25.8246	26.3131	27.1915	27.1923	NaN	25.7188	NaN	NaN		+		+	-1.10326	-1.85603	2.15617	2.88581	G_PP1_G_WT;S_PP1_S_WT	exported protein 1	PBANKA_0926700.1-p1	3	3	35.5	35.5	35.5	17.944	0	192.14	932280000
NaN	NaN	NaN	NaN	NaN	24.2836	24.6641	23.5526	23.6515	NaN	25.1768	25.0514	25.1098	25.2892	25.1499	NaN	NaN	NaN	NaN	NaN	25.6187	24.1905	23.7054	24.6918	25.3361	26.2614	NaN	26.5068	27.5446	23.8571	+	+	+		-2.27151	-1.86287	-2.93269	-0.590679	G_I2_G_WT;G_PP1_G_WT;S_I2_S_WT	fam-a protein	PBANKA_1327021.1-p1;PBANKA_1327251.1-p1	6	2	34.6	34.6	11.3	34.334	0	101.86	459370000
26.1614	24.7508	25.6953	25.573	25.0308	25.3948	25.7287	23.3715	25.018	24.3937	26.5013	25.9524	26.7866	27.3551	26.6711	NaN	NaN	23.8276	NaN	24.29	24.8709	NaN	NaN	NaN	24.1898	24.8577	NaN	24.9145	25.4952	NaN	+	+			-1.21105	-1.87197	-0.989692	-1.11741	G_I2_G_WT;G_PP1_G_WT	deoxyuridine 5-triphosphate nucleotidohydrolase, putative	PBANKA_0921300.1-p1	6	6	52	52	52	19.727	0	126.79	734290000
NaN	NaN	NaN	NaN	NaN	NaN	NaN	22.3161	NaN	NaN	22.9358	22.6839	22.8348	22.738	22.9456	NaN	NaN	NaN	NaN	NaN	22.9701	NaN	NaN	22.9964	23.0031	23.3708	NaN	24.5301	25.7102	NaN					-0.393571	-0.524669	-1.00092	-1.01533		MSP7-like protein	PBANKA_1349000.1-p1	6	6	16.7	16.7	16.7	36.178	0	9.5883	109950000
23.6061	23.7023	23.0968	23.4968	23.3142	NaN	23.8919	23.9997	NaN	24.9633	23.8164	23.4363	24.8812	23.8914	23.683	23.7046	23.9828	23.6209	25.7553	23.3081	NaN	NaN	26.8974	26.7066	NaN	24.5178	24.6466	24.8439	25.0624	24.5936					-0.498417	-0.255024	-0.658546	-1.02014		60S ribosomal protein L38, putative	PBANKA_0918100.1-p1	2	2	25.9	25.9	25.9	9.6737	0	9.002	563510000
NaN	NaN	NaN	NaN	NaN	NaN	NaN	NaN	NaN	NaN	24.0038	23.8157	23.9419	24.153	23.7353	NaN	NaN	23.7928	24.0073	24.4338	24.8088	24.3079	23.9946	24.4031	24.5759	24.9933	NaN	25.1986	25.6323	NaN	+	+			-1.22158	-1.87694	-0.196831	0.696685	G_I2_G_WT;G_PP1_G_WT	conserved Plasmodium protein, unknown function	PBANKA_0205000.1-p1	4	4	27.3	27.3	27.3	19.903	0	141.54	250520000
NaN	NaN	NaN	NaN	NaN	23.8414	23.7525	23.4863	23.6592	NaN	23.7176	23.9008	23.9354	24.2093	23.7991	NaN	NaN	NaN	NaN	NaN	NaN	NaN	NaN	NaN	NaN	23.8646	23.6608	NaN	24.0728	NaN	+				-1.47172	-0.505117	-0.71953	-1.0733	G_I2_G_WT	eukaryotic translation initiation factor 3 subunit K, putative	PBANKA_0408600.1-p1	4	4	23.4	23.4	23.4	28.001	0	13.946	171340000
NaN	NaN	NaN	NaN	23.623	NaN	NaN	NaN	NaN	NaN	23.2071	24.2482	23.9606	23.4112	24.4271	24.1689	23.9717	NaN	24.5836	24.0019	24.3849	23.6209	24.1155	NaN	24.1455	24.2793	24.9241	24.2125	24.5093	25.261		+			-0.729023	-1.87744	-1.05324	-1.14117	G_PP1_G_WT	arginase	PBANKA_0414800.1-p1	8	8	31.6	31.6	31.6	39.607	0	37.668	263500000
NaN	NaN	NaN	NaN	NaN	NaN	NaN	NaN	NaN	NaN	23.9815	23.9423	24.2896	24.9684	24.1443	NaN	NaN	NaN	NaN	22.7075	NaN	NaN	NaN	NaN	23.385	23.8115	NaN	NaN	24.1391	NaN	+	+			-1.39746	-1.87793	-0.129492	-0.305537	G_I2_G_WT;G_PP1_G_WT	ubiquitin-conjugating enzyme E2, putative	PBANKA_0404200.1-p1	3	3	18.7	18.7	18.7	15.612	0	4.0303	99811000
27.0949	26.1785	27.0931	26.98	27.6002	26.6579	27.0257	25.7941	26.5441	25.7903	27.9613	28.0625	28.4973	28.3668	28.3601	24.8605	22.82	26.1621	24.8354	26.3916	25.265	21.3353	23.5917	24.3769	23.9531	25.8325	21.6343	25.9056	26.5385	24.9717	+	+			-1.26029	-1.88718	0.0374065	-1.27209	G_I2_G_WT;G_PP1_G_WT	glucose-6-phosphate isomerase, putative	PBANKA_1008800.1-p1	25	25	49.1	49.1	49.1	68.074	0	246.92	2153700000
NaN	NaN	NaN	NaN	NaN	23.3307	23.5191	NaN	22.8681	NaN	24.5524	24.2401	24.5209	24.7615	24.1157	NaN	NaN	NaN	NaN	NaN	23.5037	NaN	NaN	NaN	NaN	23.8359	NaN	24.403	24.7279	NaN	+	+			-1.98313	-1.88978	-0.708913	-0.513685	G_I2_G_WT;G_PP1_G_WT	conserved Plasmodium protein, unknown function	PBANKA_0618900.1-p1	4	4	24.4	24.4	24.4	25.863	0	11.68	138140000
29.5017	28.0071	29.4248	29.3277	28.6684	29.4862	29.6798	28.2159	28.9479	28.2481	30.73	30.5388	30.978	31.251	30.8098	27.0056	26.6098	28.1589	26.958	28.665	29.3456	28.2616	27.4905	28.589	28.8132	29.9242	27.3668	30.3086	30.7156	27.8293	+	+			-1.87559	-1.94593	-1.74944	-0.728904	G_I2_G_WT;G_PP1_G_WT	L-lactate dehydrogenase	PBANKA_1340100.1-p1	23	23	75.9	75.9	75.9	34.424	0	323.31	14316000000
NaN	NaN	NaN	NaN	NaN	23.3561	NaN	NaN	NaN	NaN	24.2733	24.1881	24.3736	25.1899	24.2229	NaN	NaN	NaN	NaN	NaN	NaN	NaN	NaN	NaN	NaN	NaN	NaN	NaN	NaN	NaN	+	+			-1.731	-1.95851	0	0	G_I2_G_WT;G_PP1_G_WT	conserved Plasmodium protein, unknown function	PBANKA_0908800.1-p1	4	4	15.6	15.6	15.6	37.037	0	10.81	103910000
24.0918	23.4923	23.5547	24.4289	25.4836	28.4531	27.9382	27.8888	28.2781	27.7374	27.7378	27.0502	28.047	28.4156	28.0095	NaN	NaN	NaN	NaN	22.2171	23.2634	NaN	22.0956	21.4655	22.3042	22.9475	NaN	23.1844	24.5221	22.8189	+				-3.64178	0.207079	-1.28721	-1.14627	G_I2_G_WT	LCCL domain-containing protein	PBANKA_1300700.1-p1	34	34	26.6	26.6	26.6	183.69	0	230.69	2496500000
25.4302	24.1437	25.099	25.0163	25.0901	25.1733	25.0683	24.0773	24.5688	24.2915	26.5928	26.7532	26.5315	26.5569	26.5684	23.7094	24.8043	24.6657	23.9703	25.1996	24.6009	NaN	NaN	NaN	NaN	24.4963	NaN	25.5803	25.8754	23.1488	+	+			-1.64467	-1.96468	0.455907	-1.4625	G_I2_G_WT;G_PP1_G_WT	superoxide dismutase [Fe], putative	PBANKA_1422700.1-p1	4	4	31.8	31.8	31.8	22.568	0	60.393	704240000
NaN	NaN	NaN	NaN	NaN	NaN	NaN	NaN	22.9912	NaN	24.0264	23.7463	24.4725	24.6214	24.0593	NaN	NaN	NaN	NaN	NaN	NaN	NaN	NaN	23.003	NaN	23.4292	22.7062	23.4758	23.7897	23.1676	+	+			-1.52117	-1.96945	-1.1137	-0.918958	G_I2_G_WT;G_PP1_G_WT	ras-related protein Rab-1B, putative	PBANKA_1112300.1-p1	3	3	25.5	21.5	21.5	22.906	0	72.712	168050000
27.5527	27.4809	27.2682	26.9943	27.3278	27.0202	27.3971	27.15	26.9731	26.9134	27.5998	27.6043	27.5136	27.3913	27.439	27.2316	27.3351	27.1675	27.5321	27.2889	26.4581	25.7279	26.1966	25.9842	25.5914	26.8363	27.3793	26.9955	27.0125	27.5883				+	-0.184806	-0.41883	0.148653	-1.17073	S_PP1_S_WT	glutathione S-transferase, putative	PBANKA_1023900.1-p1	5	5	28.3	28.3	28.3	24.038	0	96.544	3055900000
NaN	NaN	NaN	NaN	24.917	24.7142	25.0814	NaN	24.7548	NaN	25.6922	25.7111	25.8661	25.8827	25.7922	NaN	24.8585	24.8082	24.4529	25.6744	24.7056	24.602	24.8886	25.1624	24.9253	25.5943	24.448	25.6641	25.7773	NaN	+	+			-3.12111	-2.00503	-0.356686	0.0318039	G_I2_G_WT;G_PP1_G_WT	proteasome subunit beta type-6, putative	PBANKA_0832600.1-p1	5	5	31.6	31.6	31.6	31.722	0	160.02	628940000
24.6564	24.7039	NaN	NaN	24.9886	24.7744	NaN	24.7237	24.8449	NaN	25.0362	25.0068	25.1099	25.1363	25.9849	NaN	NaN	24.4493	NaN	24.5778	24.5128	NaN	24.4581	24.5623	24.4759	24.6827	24.8392	24.745	24.8931	24.8991	+	+	+		-1.52138	-2.04534	-1.61013	-0.78232	G_I2_G_WT;G_PP1_G_WT;S_I2_S_WT	cyclase-associated protein	PBANKA_0208000.1-p1	2	2	18.6	18.6	18.6	18.469	0	13.701	471720000
24.9832	NaN	25.3762	23.3902	24.6028	25.0236	25.6879	23.4529	24.0759	22.7482	26.0717	25.7474	26.352	26.888	26.3798	NaN	NaN	NaN	NaN	NaN	21.1645	NaN	NaN	21.5121	20.7796	21.8936	NaN	22.8212	23.7027	NaN	+	+			-1.99918	-2.09009	0.157714	-0.568481	G_I2_G_WT;G_PP1_G_WT	conserved Plasmodium protein, unknown function	PBANKA_0301300.1-p1	7	7	75.8	75.8	75.8	9.8086	0	295.43	483730000
25.6068	23.9538	25.9587	25.1319	24.5612	26.0541	26.47	24.1822	25.635	25.0855	27.5722	27.1664	27.9296	28.2047	27.495	24.4954	23.2528	25.6974	24.4551	26.2667	27.2829	25.9118	24.6529	26.6943	26.7341	28.1686	21.7429	28.7115	29.1471	25.2015	+	+			-2.6311	-2.18821	-1.76084	-0.339093	G_I2_G_WT;G_PP1_G_WT	adenosine deaminase, putative	PBANKA_0513600.1-p1	13	13	39.9	39.9	39.9	41.989	0	193.61	2115900000
NaN	NaN	NaN	NaN	NaN	NaN	24.4289	NaN	NaN	NaN	24.7387	24.7876	25.105	24.4986	24.538	NaN	NaN	24.33	24.2241	24.6181	NaN	NaN	NaN	NaN	NaN	NaN	NaN	NaN	NaN	NaN	+	+	+		-2.3946	-2.20487	2.03319	0	G_I2_G_WT;G_PP1_G_WT;S_I2_S_WT	ATP-dependent protease subunit ClpQ, putative	PBANKA_1445100.1-p1	3	3	26.6	26.6	26.6	22.889	0	6.6615	227830000
NaN	NaN	NaN	NaN	NaN	NaN	NaN	NaN	NaN	NaN	23.7275	23.595	23.7941	23.8154	24.0413	24.1174	NaN	NaN	NaN	NaN	NaN	NaN	23.4727	NaN	NaN	NaN	NaN	23.593	NaN	23.955	+	+			-1.57292	-2.22962	-0.0929501	-0.51584	G_I2_G_WT;G_PP1_G_WT	activator of Hsp90 ATPase, putative	PBANKA_0406700.1-p1	4	4	42.1	42.1	42.1	16.362	0	8.8338	152660000
24.9888	25.2447	24.9732	25.0645	25.5445	24.1601	24.1865	NaN	23.8758	NaN	25.5228	25.6865	25.4245	25.375	25.3625	24.7422	24.8089	24.4867	24.78	24.8763	24.073	NaN	23.7926	NaN	NaN	NaN	NaN	NaN	24.2718	NaN		+	+		-0.311152	-2.24678	2.25246	0.685706	G_PP1_G_WT;S_I2_S_WT	thymidylate kinase, putative	PBANKA_1464200.1-p1	6	6	36.2	36.2	36.2	25.513	0	18.878	461080000
24.9843	24.8879	25.1359	25.1593	25.3642	24.609	24.5963	24.4322	24.1954	NaN	26.202	26.1202	26.1926	26.167	26.2332	24.4203	24.3873	25.3717	24.7371	25.8257	24.383	23.9989	23.8227	24.345	24.5624	25.5336	NaN	25.8707	26.1688	24.7879	+	+			-1.07668	-2.25671	0.082473	-0.643497	G_I2_G_WT;G_PP1_G_WT	proteasome subunit beta type-2, putative	PBANKA_1334100.1-p1	8	8	44.1	44.1	44.1	22.863	0	26.871	694700000
27.9755	24.1432	27.197	27.0181	27.2728	26.9819	27.506	25.6499	26.3282	25.531	28.5143	28.4704	28.5902	29.0075	28.7391	25.6434	25.1957	26.9883	25.256	27.21	27.0636	26.3381	25.102	26.6126	26.6502	27.952	22.6064	28.2168	28.7757	25.3907	+	+			-1.94296	-2.26488	-0.529648	-0.235033	G_I2_G_WT;G_PP1_G_WT	phosphoglycerate mutase, putative	PBANKA_0928100.1-p1	15	15	67.6	67.6	67.6	28.707	0	194.82	3265400000
24.1408	23.7108	24.4101	24.325	25.2471	NaN	23.6704	23.2461	23.6084	23.1233	24.8935	25.4254	25.03	25.602	25.6404	23.0898	22.7414	23.9439	23.3838	23.707	NaN	NaN	NaN	NaN	NaN	NaN	NaN	NaN	NaN	NaN	+	+	+		-0.951527	-2.28752	1.71146	0	G_I2_G_WT;G_PP1_G_WT;S_I2_S_WT	actin-depolymerizing factor 2	PBANKA_1137500.1-p1	5	5	46.9	46.9	46.9	16.714	0	18.721	321840000
NaN	NaN	NaN	NaN	NaN	24.6645	NaN	NaN	NaN	NaN	24.8023	24.7149	24.7435	25.1184	24.9906	NaN	NaN	NaN	NaN	NaN	NaN	24.0158	NaN	24.1273	NaN	24.7634	NaN	24.9016	25.5078	NaN	+	+			-2.20166	-2.43094	-1.29155	-0.878299	G_I2_G_WT;G_PP1_G_WT	translationally-controlled tumor protein homolog	PBANKA_1110500.1-p1	3	3	11.7	11.7	11.7	19.874	0	4.5896	237130000
NaN	NaN	NaN	24.7022	24.2555	24.1558	24.3909	23.9912	24.2147	23.8542	24.3896	24.4483	24.4807	25.0387	24.6211	NaN	NaN	NaN	NaN	23.9577	NaN	23.6958	NaN	23.8759	23.9998	24.5301	NaN	24.4601	25.0649	24.0511	+		+		-1.47217	-0.474301	-1.82315	-1.36845	G_I2_G_WT;S_I2_S_WT	proteasome subunit alpha type-4, putative	PBANKA_1130400.1-p1	5	5	30.1	30.1	30.1	27.67	0	75.713	331970000
26.1782	26.456	26.3965	26.4505	27.2878	25.9789	26.2648	26.2294	26.6479	26.459	26.472	26.7082	26.507	26.464	26.4523	25.7098	25.0005	25.9812	25.8534	26.2456	24.9649	NaN	23.8852	23.7982	23.9781	23.6665	24.1496	25.1536	25.3176	26.5448					0.0331013	-0.204704	0.79167	-1.40481		phosphomannomutase, putative	PBANKA_0501700.1-p1	11	11	55.9	55.9	55.9	28.311	0	137.47	1502800000
NaN	NaN	NaN	NaN	NaN	NaN	NaN	NaN	NaN	NaN	NaN	NaN	NaN	NaN	NaN	NaN	NaN	NaN	NaN	NaN	NaN	NaN	23.8628	23.7473	23.6298	24.2606	24.7377	24.2435	24.0191	24.566			+	+	0	0	-2.15379	-1.45487	S_I2_S_WT;S_PP1_S_WT	conserved Plasmodium protein, unknown function	PBANKA_0505300.1-p1	5	5	4.8	4.8	4.8	193.39	0	8.8616	81567000
NaN	NaN	NaN	NaN	NaN	NaN	23.2659	NaN	NaN	NaN	24.226	23.8861	24.1465	24.6393	23.9443	NaN	NaN	NaN	NaN	NaN	23.759	NaN	NaN	NaN	NaN	24.0705	NaN	24.4165	24.6896	NaN	+	+			-1.60618	-2.43524	-1.5435	-1.10713	G_I2_G_WT;G_PP1_G_WT	cytochrome c, putative	PBANKA_1038000.1-p1	5	5	41.4	41.4	41.4	13.025	0	9.786	99858000
NaN	NaN	25.1687	NaN	25.0547	25.2631	25.0204	23.7887	24.4807	23.6061	27.065	26.7007	27.1157	27.5296	26.5477	NaN	NaN	23.6652	NaN	24.9012	24.5777	23.186	23.2751	23.4962	23.7581	26.0728	NaN	26.1967	26.5171	24.1339	+	+			-3.68187	-2.55994	-1.57294	-1.32739	G_I2_G_WT;G_PP1_G_WT	6-phosphogluconate dehydrogenase, decarboxylating, putative	PBANKA_1318400.1-p1	12	12	29.2	29.2	29.2	53.357	0	57.2	792350000
NaN	NaN	NaN	NaN	NaN	NaN	NaN	24.3613	NaN	NaN	25.0115	24.6618	24.7892	25.0037	24.9188	NaN	NaN	NaN	NaN	NaN	24.5111	NaN	NaN	NaN	NaN	24.4696	NaN	NaN	NaN	NaN	+	+			-2.45113	-2.70719	-0.286109	0.234093	G_I2_G_WT;G_PP1_G_WT	histidine--tRNA ligase, putative	PBANKA_1308900.1-p1	10	10	11	11	11	124.65	0	8.4861	204440000
24.0378	25.075	23.2933	24.7031	24.6326	23.7651	23.6092	23.8811	24.2326	23.5082	23.9099	24.5243	24.3639	23.5869	23.5685	26.2655	25.6414	25.3116	25.7682	25.5669	26.257	24.7962	26.2162	26.2218	25.3298	27.6314	27.3321	27.2517	26.889	27.408			+	+	0.357689	-0.191446	-1.59174	-1.53823	S_I2_S_WT;S_PP1_S_WT	YEATS domain-containing protein, putative	PBANKA_1223600.1-p1	5	5	31.7	31.7	31.7	26.054	0	11.347	999550000
23.4814	NaN	NaN	NaN	NaN	24.5481	25.0326	22.5783	24.0963	NaN	26.5644	26.0191	26.7653	27.1659	26.7035	NaN	NaN	NaN	NaN	NaN	24.3594	NaN	NaN	22.4752	23.2775	25.0505	NaN	25.6412	25.9595	23.2693	+	+	+	+	-4.13242	-2.99942	-1.90298	-1.75864	G_I2_G_WT;G_PP1_G_WT;S_I2_S_WT;S_PP1_S_WT	transketolase, putative	PBANKA_0109100.1-p1	14	14	22.8	22.8	22.8	75.511	0	19.692	496070000
NaN	NaN	NaN	NaN	NaN	NaN	NaN	NaN	NaN	NaN	25.1158	24.8994	25.7095	25.3835	25.7967	NaN	NaN	NaN	NaN	NaN	NaN	NaN	NaN	NaN	NaN	NaN	NaN	NaN	NaN	NaN	+	+			-2.32745	-3.48931	0	0	G_I2_G_WT;G_PP1_G_WT	histone H3, putative	PBANKA_0108800.1-p1;PBANKA_1117100.1-p1	2	2	13.2	13.2	13.2	15.446	0.00049652	3.0954	495580000
NaN	NaN	NaN	NaN	NaN	NaN	NaN	NaN	NaN	NaN	NaN	29.056	29.2922	29.5315	NaN	NaN	NaN	NaN	NaN	NaN	30.5983	31.0014	30.4274	30.1706	30.2734	30.3666	31.473	30.8033	30.3581	30.7251	+	+	+		-4.03224	-4.65117	-8.77194	-0.251007	G_I2_G_WT;G_PP1_G_WT;S_I2_S_WT	conserved Plasmodium protein, unknown function	PBANKA_1356800.1-p1	3	3	0.4	0.4	0.4	840.67	0.0087646	1.69	44588000000
26.3311	NaN	25.0329	NaN	26.8948	25.7745	26.0175	25.7923	25.8833	25.0692	25.9508	26.3114	25.9924	25.9563	27.0114	26.1178	24.98	25.9675	25.695	26.379	23.5064	23.9723	NaN	NaN	NaN	24.8634	NaN	23.846	25.9002	25.6995	+			+	-1.34648	-0.537113	1.18378	-1.77856	G_I2_G_WT;S_PP1_S_WT	glutaredoxin 1, putative	PBANKA_0404700.1-p1	3	3	38.5	38.5	38.5	12.387	0	76.294	1222300000
[truncated: 17 more columns]

## Sheet: 2. PP1 interactome in schizonts
Table S1. Sheet 2. Identified proteins after PbPP1c-mCherry immunoprecipitation in P. berghei schizonts. The table shows the protein name (updated using PlasmoDB relapse 54, sept 2021) , accession number, molecular weight of identified proteins, RVXF motif and the Student's T-test value. The immunoprecipitation was performed with anti-RFP antibodies on 5 biological replicates of soluble protein e…
Protein Name	Protein accession number (Plasmo DB)	Mol. weight [kDa]	RVXF motif	Student's T-test Difference PP1-WT
leucine-rich repeat protein, putative	PBANKA_0516600	36.735	no	12.6349
protein phosphatase inhibitor 2, putative	PBANKA_1218500	16.664	KTISW(12-16)	12.2825
serine/threonine protein phosphatase PP1	PBANKA_1028300	34.963	RGVSF(219-233)	10.7416
regulator of chromosome condensation-PP1-interacting protein	PBANKA_0820800	292.19	KNVNF(288-292) KTVSF(818-822) KYIKF(1960-1964) KKIEF(2118-2122) KDINF(2454-2458)	9.60997
nucleoporin NUP637, putative	PBANKA_0107600	637.24	KIIKF(301-305) KKIDF(645-649) KCVNF(1806-1810) KILF(2828-2831) RDVLF(2833-2837) KEINF (2926-2930) KIVF(3716-3719) KDIKF(3397-3401) KNIYF(3748-3752) KIIFF(3804-3808) KKIKF(4257-4261) KSVFF(4366-4370) KKVHF(4575-4579)	9.59627
nuclear export mediator factor NEMF, putative	PBANKA_0601600	201.93	KLILF(302-306) RKVFW(659-663) RHISF(1185-1189) KGVAF(1256-1260) KSVSF(1334-1338) KKVKF(1404-1408) KIIF(131-134) KVCF(1129-1132) KVSF(1242-1245)	9.19584
conserved Plasmodium protein, unknown function	PBANKA_0621300	205.13	KNVKF(177-181) KSVQF(327-331) RNIIF(1002-1006)	9.17853
protein GEXP15	PBANKA_0515400	77.377	KKVQF(32-36) KNVYF(490-494)	7.79915
pre-mRNA-processing-splicing factor 8, putative	PBANKA_1003100	344.37	KIAF(620-623)	7.41028
protein phosphatase inhibitor 3, putative	PBANKA_0515500	13.066	KVTW(38-41)	7.1088
RTR1 domain-containing protein, putative	PBANKA_0310800	97.344	KSVSF(281-285) KMIGF(456-460)	6.91626
U5 small nuclear ribonucleoprotein component, putative	PBANKA_1202200	138.14	RISF(116-119) KIFF(711-714)	5.71244
conserved Plasmodium protein, unknown function	PBANKA_0710500	67.544	KIDF(121-124) KFITF(311-315) KHIRF(487-491)	5.34028
acid phosphatase, putative	PBANKA_1014400	243.23	KQIKF(533-537) KPIDF(628-632) KINF(1978-1981)	5.00533
DNA-directed RNA polymerase II subunit RPB1, putative	PBANKA_0807000	261.05	KRVDF(379-383) KGIDW(1334-1338)	4.92681
nucleolar protein Nop52, putative	PBANKA_0831900	65.509	KKIFF(216-220) KKVHF(505-509)	4.78337
pre-mRNA-splicing helicase BRR2, putative	PBANKA_0522900	288.18	KPVDF(56-60) KLIIF(750-754) KNISF(1295-1299) KINF(2415-2418)	4.37107
U5 small nuclear ribonucleoprotein 40 kDa protein, putative	PBANKA_0707800	36.809	KICF(225-228)	4.2508
60S ribosomal protein L19, putative	PBANKA_1229200	21.596	no	4.15049
40S ribosomal protein S20e, putative	PBANKA_1201900	13.513	no	4.13313
conserved protein, unknown function	PBANKA_0311200	65.768	KKVSF(9-13) KTITF(324-328)	4.04253
DNA helicase, putative	PBANKA_0712100	120.76	KKIIF(337-341)	3.89015
ribosome production factor 1, putative	PBANKA_0822700	39.707	KVVVF(262-266)	3.80128
60S ribosomal protein L32, putative	PBANKA_0417500	15.523	no	3.77888
DNA-directed RNA polymerase II subunit RPB2, putative	PBANKA_0312400	148.25	no	3.72922
AP2 domain transcription factor, putative	PBANKA_0112100	300.75	KNINF(1399-1403) RGVYF(1816-1820) KNISF(2281-2285)	3.68384
glutamate synthase [NADH], putative	PBANKA_1009500	336.29	no	3.67196
60S ribosomal protein L15, putative	PBANKA_0717800	24.082	no	3.6223
60S ribosomal protein L18-2, putative	PBANKA_1354500	21.523	no	3.61629
heat shock protein DNAJ homologue Pfj4, putative	PBANKA_0609900	27.879	no	3.6111
40S ribosomal protein S23, putative	PBANKA_0405300	16.116	no	3.49658
60S ribosomal protein L36, putative	PBANKA_0937700	12.726	no	3.48634
small nuclear ribonucleoprotein Sm D2, putative	PBANKA_0315200	11.799	no	3.46345
regulator of MON1-CCZ1 complex, putative	PBANKA_1441200	94.91	RISF(294-297) KIIKF(730-734)	3.41286
peptidyl-prolyl cis-trans isomerase, putative	PBANKA_1109800	85.451	KVVNF(464-468)	3.41003
conserved protein, unknown function	PBANKA_0939700	76.732	KLVAF(303-307)	3.3051
conserved protein, unknown function	PBANKA_0622800	89.461	no	3.28269
conserved Plasmodium protein, unknown function	PBANKA_1131500	66.814	KKVHF(87-91)	3.21782
small nuclear ribonucleoprotein E, putative	PBANKA_1363000	10.994	no	3.21437
ubiquitin carboxyl-terminal hydrolase, putative	PBANKA_0210600	326.23	KNVNF(133-137) RILF(184-187) KITF(2739-2742)	3.19455
conserved Plasmodium protein, unknown function	PBANKA_0920400	226.22	KNVTF(264-268) KVNF(1012-1015) KIIF(1049-1052) KYVQF(1127-1131) KIAF(1604-1607)	3.19323
DNA polymerase alpha catalytic subunit A, putative	PBANKA_0613200	198.94	KIVF(435-438) KYINF(614-618) KGINF(1193-1197) RIIF(1215-1218) KPVIF(1439-1443)	3.16263
conserved protein, unknown function	PBANKA_1425900	154.42	KNVNF(493-497) KKITF(757-761) RYIEF(967-971) KNIEF(1186-1190) RIVF(201-204) RISF(748-751)	3.13011
conserved protein, unknown function	PBANKA_1033100	30.48	KYIKF(110-114) KAVWF(121-125) KKITF(141-145)	3.10422
serine/arginine-rich splicing factor 12, putative	PBANKA_1103000	38.141	KSISF(266-270)	3.01577
rhoptry neck protein 5	PBANKA_0713100	131.89	KKVGF(332-336) RNVGF(524-528) KKIFF(675-679) KDINF(1092-1096) RIDF(284-287) RIVW(1033-1036)	2.97228
alpha tubulin 1	PBANKA_0417700	50.206	RIHF(264-267) RTIQF(339-343)	2.95716
rhoptry neck protein 2	PBANKA_1315700	236.55	no	2.92153
exported protein 1	PBANKA_0926700	17.944	no	2.88581
myosin A-tail interacting protein	PBANKA_1459500	23.763	RKIYF(77-81)	2.83488
gamete egress protein GEP	PBANKA_1115200	132.84	KIEW(605-608) KIFF(1063-1066)	2.82946
MORC family protein, putative	PBANKA_1331400	301.55	KDIKF(1716-1720) RIKW(729-732)	2.80393
60S ribosomal protein L13-2, putative	PBANKA_1423500	25.418	RVDF(22-25)	2.73649
small nuclear ribonucleoprotein G, putative	PBANKA_0708400	9.45	no	2.7305
nucleolar protein 5, putative	PBANKA_1207000	53.172	KIIGF(212-126)	2.73046
small nuclear ribonucleoprotein Sm D3, putative	PBANKA_0811000	12.852	no	2.67385
fam-a protein	PBANKA_1246141	33.845	KIIF(7-10)	2.66955
60S ribosomal protein L7-3, putative	PBANKA_1019400	33.284	KYVKW(68-72)	2.61914
60S ribosomal protein L22, putative	PBANKA_0709100	16.025	no	2.60216
DNA polymerase delta catalytic subunit, putative	PBANKA_0501300	126.55	RIQF(451-454) KIEW(1094-1097)	2.60053
40S ribosomal protein S5, putative	PBANKA_0619100	21.743	no	2.51202
DNA-directed RNA polymerase II subunit RPB3, putative	PBANKA_0823900	38.594	no	2.50877
zinc finger protein, putative	PBANKA_0604200	133.11	no	2.49641
replication factor C subunit 1, putative	PBANKA_0316000	99.232	KRIQF(542-546) RINF(677-680)	2.4612
clathrin heavy chain, putative	PBANKA_1434700	230.16	RAIEF(1399-1403) KVIDF(1713-1717)	2.45594
small nuclear ribonucleoprotein-associated protein B, putative	PBANKA_1027900	21.781	no	2.45097
60S ribosomal protein L17, putative	PBANKA_1364200	22.853	RVHF(23-26)	2.44935
structural maintenance of chromosomes protein 1, putative	PBANKA_0917500	192.45	no	2.43934
60S ribosomal protein L6, putative	PBANKA_1351900	26.743	no	2.43506
trailer hitch homolog	PBANKA_1301300	39.068	no	2.41766
AP-1 complex subunit gamma, putative	PBANKA_1319200	121.51	KIFF(539-542)	2.38372
60S ribosomal protein L35ae, putative	PBANKA_0906400	16.483	no	2.37785
phosphoglycerate mutase, putative	PBANKA_0408400	126.18	no	2.36409
DNA primase large subunit, putative	PBANKA_0812000	63.719	RIAF(161-164)	2.32991
AP-1/2 complex subunit beta, putative	PBANKA_1242700	107.2	RNINF(306-310)	2.29909
60S ribosomal protein L3, putative	PBANKA_0511900	44.366	KINF(188-191) RVQF(256-259)	2.28537
tubulin gamma chain, putative	PBANKA_1226600	51.609	KDIFF(48-52) KLVNF(342-346)	2.26193
membrane protein ICM1	PBANKA_1446100	206.38	RTITW(31-35) KFVSF(125-129) KSIWF(540-544) KGIRF (821-825) KAVFF(881-885) KGVAF(954-958)	2.24999
small nuclear ribonucleoprotein Sm D1, putative	PBANKA_0922800	13.919	KLVTF(2-6)	2.22481
DNA-directed RNA polymerases I, II, and III subunit RPABC3, putative	PBANKA_1429500	16.482	no	2.22455
conserved Plasmodium protein, unknown function	PBANKA_0906900	273.17	no	2.22106
60S ribosomal protein L26, putative	PBANKA_0410600	14.79	no	2.21191
transformer-2 protein homolog beta, putative	PBANKA_1200800	30.195	no	2.17916
60S ribosomal protein L7, putative	PBANKA_0405500	30.49	KKVVF(90-94)	2.15735
60S ribosomal protein L6, putative	PBANKA_1338300	21.646	KVVMW(55-59) KRVRF(120-124)	2.14203
60S ribosomal protein L21, putative	PBANKA_1018600	18.713	no	2.12576
ribosomal protein L27a, putative	PBANKA_1117500	16.837	RINF(42-45)	2.10848
60S ribosomal protein L2, putative	PBANKA_1231700	27.89	KILF(60-63)	2.1002
40S ribosomal protein S27, putative	PBANKA_1406800	9.2008	no	2.09684
translational activator GCN1, putative	PBANKA_1403800	394.9	KIHF(99-102) KKIFF(113-117) KIIF(385-388) KDVIF(548-552) KYICF(603-607) KKVCF(872-876) KLIVF(957-961) KTIAF(1370-1374) KYIIF(1391-1395) KSIKF(2586-2590) KIDF(2773-2776)	2.09546
dicarboxylate/tricarboxylate carrier, putative	PBANKA_0706700	35.631	no	2.08843
dynein heavy chain, putative	PBANKA_0925400	604.54	RNIIF(360-364) KIEF(984-987) KIIDF(1443-1447) KILF (2030-2033) KLIYF(2657-2661) KEIIF(3877-3881) KTVIF(4596-4600) KIGF(4617-4620) KNILF (4761-4765) RIIF(4986-4989)	2.05519
NPL domain-containing protein, putative	PBANKA_1424300	32.586	no	2.03367
tRNA-splicing ligase RtcB, putative	PBANKA_0941200	56.31	no	2.0164
40S ribosomal protein S19, putative	PBANKA_1416300	16.876	no	1.99582
40S ribosomal protein S8e, putative	PBANKA_1033900	24.993	no	1.98895
conserved Plasmodium protein, unknown function	PBANKA_1305000	26.52	no	1.98077
dolichyl-phosphate-mannose--protein mannosyltransferase, putative	PBANKA_1209100	26.1	no	1.97677
AP-1 complex subunit mu-1, putative	PBANKA_1409900	52.909	RTISF(284-288)	1.97532
40S ribosomal protein S3, putative	PBANKA_1329300	24.736	no	1.97393
40S ribosomal protein S11, putative	PBANKA_0807600	18.72	KTVRF(136-140)	1.97156
acyl-CoA synthetase, putative	PBANKA_0311800	86.205	KVHF(345-348)	1.96132
DNA-directed RNA polymerase II subunit RPB11, putative	PBANKA_1403400	14.206	KVTF(60-63)	1.96024
conserved Plasmodium protein, unknown function	PBANKA_0836200	79.491	RTIEF(268-272)	1.94071
HECT-type E3 ubiquitin ligase UT, putative	PBANKA_0802300	405.31	KKIFF(343-347) KISF(917-920) KIFF(1030-1033) KILF(2308-2311)	1.93205
fam-a protein	PBANKA_0600021	37.019	no	1.93067
60S ribosomal protein L4, putative	PBANKA_1106700	46.131	no	1.93019
phosphoglucomutase-2	PBANKA_0715500	34.968	no	1.90258
casein kinase II beta chain, putative	PBANKA_0943200	27.978	RIIF	1.90122
choline-phosphate cytidylyltransferase	PBANKA_1415100	100.26	KHIRW(88-92) KKVGF(400-404) KHVKW(647-651)	1.89694
60S ribosomal protein L24, putative	PBANKA_1407600	18.95	KVYF(34-37)	1.87703
coatomer alpha subunit, putative	PBANKA_0105400	160.58	KSISF(13-17) RGICF(55-59) RTVQF(97-101) KSIYF(738-742)	1.87602
40S ribosomal protein S16, putative	PBANKA_1423600	16.36	no	1.86198
nucleolar GTP-binding protein 1, putative	PBANKA_0111200	78.442	KTVKF(319-323)	1.85275
60S ribosomal protein L31, putative	PBANKA_1103400	13.982	no	1.83462
60S ribosomal protein L13, putative	PBANKA_1202400	23.767	KILW(77-80) RVGW(143-146)	1.82944
60S ribosomal protein L18, putative	PBANKA_1354400	21.7	no	1.82383
sortilin, putative	PBANKA_1315500	100.95	KINF(171-174) KDVDF(261-265)	1.8223
conserved Plasmodium protein, unknown function	PBANKA_0709800	59.91	KNIDF(198-202) KILF(262-265)	1.82114
ISWI chromatin-remodeling complex ATPase, putative	PBANKA_1123500	292.62	RGVNF(1577-1581) RIKF(2363-2366)	1.81141
DNA polymerase epsilon catalytic subunit A, putative	PBANKA_1129100	334.3	KEIGF(460-464) KNILF(587-591) RYVVF(1089-1093) KGILW(2105-2109)	1.80091
V-type proton ATPase subunit E, putative	PBANKA_0835300	27.263	no	1.79533
conserved Plasmodium protein, unknown function	PBANKA_1358700	110.15	KISF(170-173)	1.7921
berghepain-1	PBANKA_1321700	60.311	no	1.78754
translocation protein SEC63, putative	PBANKA_1417300	77.763	KIIQF(98-102)	1.78238
eukaryotic translation initiation factor 6, putative	PBANKA_1347600	27.214	RVQF(4-7)	1.77992
conserved Plasmodium protein, unknown function	PBANKA_1142100	399.66	KIIKF(485-489) KNILF(760-764) KILF(1200-1203) KSIFF(1587-1591) KISF(2327-2330) KYIRF(2492-2496) KVIYF(2545-2549)	1.76948
eukaryotic translation initiation factor 3 subunit B, putative	PBANKA_1232500	84.182	KGICF(104-108) KDISF(252-256) RNVKW(493-497)	1.7651
pre-mRNA-processing factor 6, putative	PBANKA_0937400	133.1	KWIKF(558-562)	1.7632
eukaryotic translation initiation factor 3 subunit C, putative	PBANKA_0604800	108.91	no	1.7621
eukaryotic translation initiation factor 3 subunit H, putative	PBANKA_1023500	55.077	no	1.76101
ATP synthase F0 subunit b-like protein, putative	PBANKA_0923200	59.015	KLVSF(484-488)	1.75974
3-oxo-5-alpha-steroid 4-dehydrogenase, putative	PBANKA_0912700	35.158	no	1.75887
60S ribosomal protein L1, putative	PBANKA_1305100	24.819	no	1.7454
60S ribosomal protein L14, putative	PBANKA_1013100	17.924	no	1.74193
inner membrane complex protein 1g, putative	PBANKA_1240600	34.316	no	1.736
pre-mRNA-processing factor 19, putative	PBANKA_0406800	56.677	KHITF(431-435)	1.73322
rhoptry neck protein 3, putative	PBANKA_1464900	264.82	KDILF(1688-1692)	1.7315	is_pse
60S ribosomal protein L5, putative	PBANKA_1019500	33.882	no	1.73063
40S ribosomal protein S15A, putative	PBANKA_0414600	14.928	no	1.71502
mitochondrial phosphate carrier protein, putative	PBANKA_0601100	36.478	no	1.70922
erythrocyte membrane associated protein 1	PBANKA_0836800	38.263	no	1.6961
PHAX domain-containing protein, putative	PBANKA_0506100	194.52	KKINF(316-320)	1.68015
60S ribosomal protein L27, putative	PBANKA_1324400	16.864	KDVSF(135-139)	1.67168
RuvB-like helicase 1, putative	PBANKA_1427700	57.85	no	1.67021
40S ribosomal protein S3A, putative	PBANKA_1215600	29.984	no	1.65887
subtilisin-like protease 1	PBANKA_1107100	67.313	KIAW(561-564)	1.64784
thioredoxin-like protein, putative	PBANKA_1024000	74.167	KILF(3-6) KILF(228-231) KKINF(540-544)	1.64588
signal recognition particle subunit SRP54, putative	PBANKA_1313800	55.801	no	1.64379
dihydrolipoyl dehydrogenase, mitochondrial, putative	PBANKA_1446900	57.783	KVFF(10-13) KIKF(268-271) KTVSF(425-429)	1.63028
40S ribosomal protein S15, putative	PBANKA_1135100	17.257	no	1.61421
coatomer subunit beta, putative	PBANKA_1014900	145.62	KILF(181-184) RIMW(1110-1113)	1.61297
40S ribosomal protein S9, putative	PBANKA_1234800	22.146	KHIDF(154-158)	1.59319
small nuclear ribonucleoprotein F, putative	PBANKA_0921500	10.031	no	1.58821
60S acidic ribosomal protein P0, putative	PBANKA_0918000	34.86	no	1.58523
60S ribosomal protein L12, putative	PBANKA_1231800	18.214	no	1.58367
60S ribosomal protein L11a, putative	PBANKA_0617100	20.252	no	1.57326
ADP,ATP carrier protein 1, putative	PBANKA_0520200	33.805	KAILF(200-204)	1.56878
DnaJ protein, putative	PBANKA_1127800	44.229	RKIYF(4-8) KILF(259-262)	1.56484
40S ribosomal protein S7, putative	PBANKA_1401300	22.481	KLISF(168-172)	1.56329
myosin-specific chaperone UNC, putative	PBANKA_1023000	136.2	KIEW(526-529) KLIHF(938-942) KEIDF(1041-1045)	1.56258
conserved Plasmodium protein, unknown function	PBANKA_1214700	112.04	no	1.54889
EH domain-containing protein, putative	PBANKA_0402800	61.595	KVIYW	1.54334
autophagy-related protein 18, putative	PBANKA_1211300	43.534	RYIAF(10-14)	1.53256
60S ribosomal protein L28, putative	PBANKA_0906500	14.582	no	1.52181
40S ribosomal protein S18, putative	PBANKA_0922100	17.882	no	1.51826
60 kDa chaperonin, putative	PBANKA_1446800	79.832	no	1.51145
replication factor C subunit 5, putative	PBANKA_0936500	40.517	no	1.50905
40S ribosomal protein S25, putative	PBANKA_1022000	11.796	no	1.49999
coatomer subunit delta, putative	PBANKA_0913700	57.497	no	1.4868
cytoskeleton associated protein, putative	PBANKA_0805200	96.401	KKVIF(214-218)	1.48655
serine/arginine-rich splicing factor 1, putative	PBANKA_1232100	36.273	no	1.48588
eukaryotic translation initiation factor 3 subunit G, putative	PBANKA_0715200	31.554	no	1.48271
FACT complex subunit SPT16	PBANKA_1232200	127.56	KINF(13-16) RINF(642-645) KIEF(864-867)	1.46986
coatomer subunit beta, putative	PBANKA_0415500	116.6	KLIIF(38-42) KIIFF(91-95) KNVYW(470-474)	1.46815
40S ribosomal protein S4, putative	PBANKA_0941500	29.844	no	1.4599
40S ribosomal protein S5, putative	PBANKA_1310800	29.938	no	1.45197
60S ribosomal protein L10, putative	PBANKA_1028400	25.246	no	1.44839
eukaryotic peptide chain release factor subunit 1, putative	PBANKA_0309100	48.366	no	1.44515
conserved Plasmodium protein, unknown function	PBANKA_1243900	176.43	no	1.43257
subtilisin-like protease 2	PBANKA_0911700	141.32	no	1.41633
eukaryotic initiation factor 4A-III, putative	PBANKA_0523100	44.683	KVDW(268-271)	1.40774
histone H2B, putative	PBANKA_0941800	13.257	no	1.40047
40S ribosomal protein S17, putative	PBANKA_1456100	16.078	no	1.39639
conserved protein, unknown function	PBANKA_1404700	59.442	KNVFF(115-119)	1.39559
60S ribosomal protein L23, putative	PBANKA_1346700	14.974	no	1.39257
ATP synthase-associated protein, putative	PBANKA_0109600	33.483	no	1.39069
conserved Plasmodium protein, unknown function	PBANKA_1201100	106.81	KNILF(329-333)	1.38744
HSP40, subfamily A, putative	PBANKA_0610900	48.417	KIIF(235-238)	1.38704
40S ribosomal protein S11, putative	PBANKA_1231000	16.074	no	1.38662
golgi protein 1, putative	PBANKA_1418300	148.54	KEVFF(763-767)	1.38068
AP2 domain transcription factor, putative	PBANKA_0521700	319.14	KNISF(353-357)	1.37307
intron-binding protein aquarius, putative	PBANKA_1365300	269.13	KIIW(128-131) KITF(380-383) KCIEF(596-600) KRIIF(1963-1967)	1.36996
calcium-transporting ATPase, putative	PBANKA_0207000	127.35	KNILF(211-215) RIIEF(591-595) KIIF(270-273)	1.36555
60S ribosomal protein L7ae/L30e, putative	PBANKA_0721900	27.456	no	1.36084
N-acetyltransferase, GNAT family, putative	PBANKA_0611800	59.276	no	1.34805
importin alpha re-exporter, putative	PBANKA_0833600	153.3	KEIKF(599-603) KIIIF(1174-1178) KILF(45-48)	1.34553
40S ribosomal protein S19, putative	PBANKA_0522800	20.025	KITF(50-53)	1.34538
WD repeat-containing protein, putative	PBANKA_0942400	67.627	KVLF(208-211)	1.34294
nucleoside transporter 1	PBANKA_1360100	46.011	no	1.33116
multidrug resistance protein 1, putative	PBANKA_1237800	160.94	KKIEF(373-377) KNVKF(378-382) KDVNF(1126-1130) KIVVF(1380-1384) KITF(1087-1090)	1.32184
myosin E	PBANKA_0112200	228.36	KEIDF(370-374)	1.32135
golgi protein 2	PBANKA_0924800	135.57	RVLF(624-627)	1.31265
nucleolar protein 56, putative	PBANKA_0929600	57.645	RVIEW(189-93) RNVLW(280-284)	1.30954
carbamoyl phosphate synthetase, putative	PBANKA_1406700	247.64	KNITF(231-235) KAIQF(1758-1762) KVYF(664-667)	1.29565
protein transport protein SEC31, putative	PBANKA_0311000	156.63	KVGF(1223-1226)	1.27445
26S protease regulatory subunit 10B, putative	PBANKA_1404900	44.721	no	1.2724
eukaryotic translation initiation factor 3 subunit L, putative	PBANKA_0110400	67.669	KVAF(208-211)	1.24939
eukaryotic translation initiation factor 3 subunit A, putative	PBANKA_1428700	152.45	RYIEF(54-58) KEVIF(476-480) RAIYF(536-540) RIIEF(856-860)	1.247
asparagine/aspartate rich protein, putative	PBANKA_1448200	564.04	KIDF(214-217) KCVMF(316-320) KIILF(349-353) KEIEF(801-805) KNILF(847-851) KIDF(1076-1079) KTVQF(2033-2037) KNVEF(2651-2655) KIIDF(3043-3047) KIYW(3203-3206) KKIFF(4508-4512)	1.23176
PRE-binding protein, putative	PBANKA_1210200	111.2	KNIDF(439-443)	1.22714
ATP-dependent protease ATPase subunit ClpY, putative	PBANKA_0808900	89.552	KLINF(11-15) KAIMF(139-143)	1.2237
apical membrane antigen 1	PBANKA_0915000	63.749	no	1.19574
cysteine desulfurase IscS, putative	PBANKA_0211300	61.675	KEIIF(198-202) KNIIF(307-311) RIGF(490-493)	1.16787
protein SEY1, putative	PBANKA_1026600	106.84	KIIF(883-886)	1.1606
ATP-dependent RNA helicase DDX6	PBANKA_1217700	49.375	no	1.13242
DnaJ protein, putative	PBANKA_0706800	75.395	KQIAF(334-338)	1.11731
26S protease regulatory subunit 8, putative	PBANKA_1461800	48.007	RKIEF(329-333)	1.10916
small GTP-binding protein sar1, putative	PBANKA_0718800	21.915	RILF(22-25) KIRF(63-66)	1.09541
26S protease regulatory subunit 6B, putative	PBANKA_0715600	45.192	RKIEF(305-309) KVTF(200-203)	1.08973
ubiquitin-like protein, putative	PBANKA_0823000	161.46	RYVNW(1271-1275)	1.08902
elongation factor 1-alpha	PBANKA_1133400	48.958	KVDF(185-188)	1.07938
heat shock protein 101	PBANKA_0931200	103.2	KIILF(302-306) RNIDF(739-743)	1.07239
26S protease regulatory subunit 6A, putative	PBANKA_0917900	50.976	KDVNF(389-393)	1.07092
elongation factor Tu, putative	PBANKA_1345600	53.73	no	1.01966
26S proteasome regulatory subunit RPN1, putative	PBANKA_0303600	110.7	no	1.01017

## Sheet: 3. PP1 interactome gametocytes
Table S1. Sheet 3. Identified proteins after PbPP1c-mCherry immunoprecipitation in P. berghei gametocytes. The table shows the protein name (updated using PlasmoDB relapse 54, sept 2021), accession number, molecular weight of identified proteins, RVXF motif and the Student's T-test value. The immunoprecipitation was performed with anti-RFP antibodies on 5 biological replicates of soluble protein …
Protein Name	Protein accession number (Plasmo DB)	Mol. weight [kDa]	RVXF motif	Student's T-test Difference PP1-WT
protein phosphatase inhibitor 2, putative	PBANKA_1218500	16.664	KTISW(12-16)	14.4875
nucleoporin NUP637, putative	PBANKA_0107600	637.24	KIIKF(301-305) KKIDF(645-649) KCVNF(1806-1810) KILF(2828-2831) RDVLF(2833-2837) KEINF (2926-2930) KIVF(3716-3719) KDIKF(3397-3401) KNIYF(3748-3752) KIIFF(3804-3808) KKIKF(4257-4261) KSVFF(4366-4370) KKVHF(4575-4579)	10.9637
conserved Plasmodium protein, unknown function	PBANKA_0621300	205.13	KNVKF(177-181) KSVQF(327-331) RNIIF(1002-1006)	10.5846
serine/threonine protein phosphatase PP1	PBANKA_1028300	34.963	RGVSF(219-233)	10.2814
leucine-rich repeat protein, putative	PBANKA_0516600	36.735	no	9.87628
acid phosphatase, putative	PBANKA_1014400	243.23	KQIKF(533-537) KPIDF(628-632) KINF(1978-1981)	9.50126
nuclear export mediator factor NEMF, putative	PBANKA_0601600	201.93	KLILF(302-306) RKVFW(659-663) RHISF(1185-1189) KGVAF(1256-1260) KSVSF(1334-1338) KKVKF(1404-1408) KIIF(131-134) KVCF(1129-1132) KVSF(1242-1245)	9.3539
regulator of chromosome condensation-PP1-interacting protein	PBANKA_0820800	292.19	KNVNF(288-292) KTVSF(818-822) KYIKF(1960-1964) KKIEF(2118-2122) KDINF(2454-2458)	8.29166
protein phosphatase inhibitor 3, putative	PBANKA_0515500	13.066	KVTW(38-41)	8.14653
pre-mRNA-processing-splicing factor 8, putative	PBANKA_1003100	344.37	KIAF(620-623)	8.07615
protein GEXP15	PBANKA_0515400	77.377	KKVQF(32-36) KNVYF(490-494)	7.33223
RTR1 domain-containing protein, putative	PBANKA_0310800	97.344	KSVSF(281-285) KMIGF(456-460)	6.71121
peptidyl-prolyl cis-trans isomerase, putative	PBANKA_1109800	85.451	KVVNF(464-468)	6.09168
conserved Plasmodium protein, unknown function	PBANKA_0710500	67.544	KIDF(121-124) KFITF(311-315) KHIRF(487-491)	5.51816
regulator of MON1-CCZ1 complex, putative	PBANKA_1441200	94.91	RISF(294-297) KIIKF(730-734)	5.27153
pre-mRNA-splicing helicase BRR2, putative	PBANKA_0522900	288.18	KPVDF(56-60) KLIIF(750-754) KNISF(1295-1299) KINF(2415-2418)	5.0321
conserved protein, unknown function	PBANKA_0939700	76.732	KLVAF(303-307)	4.88064
DNA-directed RNA polymerase II subunit RPB1, putative	PBANKA_0807000	261.05	KRVDF(379-383) KGIDW(1334-1338)	4.86893
conserved protein, unknown function	PBANKA_0311200	65.768	KKVSF(9-13) KTITF(324-328)	4.66188
U5 small nuclear ribonucleoprotein component, putative	PBANKA_1202200	138.14	RISF(116-119) KIFF(711-714)	4.32613
U5 small nuclear ribonucleoprotein 40 kDa protein, putative	PBANKA_0707800	36.809	KICF(225-228)	4.22373
dynein heavy chain, putative	PBANKA_0214000	587.78	RNINF(79-83) RQIWF(1048-1052) KKILW(1460-1464) KILF(2481-2484) RIIMF(2927-2931) RITF(2958-2961) RPIIF(3121-3125) RFVSW(3200-3204) KITF(3241-3244) KNVTW(3587-3591) RVTF(3950-3953) KIYF(4065-4068)	4.01381
conserved Plasmodium protein, unknown function	PBANKA_1131500	66.814	KKVHF(87-91)	3.95728
P-loop containing nucleoside triphosphate hydrolase, putative	PBANKA_0202500	123.91	KDIDF(733-737) KNIYF(1006-1010)	3.56302
glutamate synthase [NADH], putative	PBANKA_1009500	336.29	no	3.37186
conserved Plasmodium protein, unknown function	PBANKA_0509700	566.52	KVIF(150-153) KYINF(747-751) KNILF(1455-1459) KNVSF(2475-2479) KSIEF(2620-2624) KTIFF(2781-2785) KIEF(2787-2790) KKIIF (2888-2892) KSIHF(3213-3217) KSIKW(3611-3615)	3.35635
conserved Plasmodium protein, unknown function	PBANKA_1420100	118.72	KNIDF(292-296) KYIKF(327-331)	3.31364
DNA-directed RNA polymerase II subunit RPB2, putative	PBANKA_0312400	148.25	no	3.28585
dynein heavy chain, putative	PBANKA_0615700	622.63	RIQF(238-241) RIFF(455-458) KIEF(1016-1019) KKIKF(1361-1365) KNILF(1664-1668) KKIEF(3497-3501) KLIAF (4203-4207) KVYF(3892-3895) KITF(4702-4705) KIDF(5179-5182)	3.25789
CCR4-NOT transcription complex subunit 1, putative	PBANKA_0943100	339.93	KLVLF(678-682) KFIIF(1545-1549)	3.23551
conserved Plasmodium protein, unknown function	PBANKA_0406200	432.27	RITF(146-149) KKIIF(1133-1137) KDISF(1261-1265) KVEF(1435-1438) RFIDF (1471-1475) KMIEF(2090-2094) KKIHF(2558-2562) KNINF(2574-2578) RILF(2590-2593) KILF(3613-3616)	3.09011
MORN repeat protein, putative	PBANKA_1405000	149.77	KIFF(971-974)	3.01267
conserved Plasmodium protein, unknown function	PBANKA_1360800	143.23	KIGW(285-288) KNIYF(987-991)	3.01163
MORC family protein, putative	PBANKA_1331400	301.55	KDIKF(1716-1720) RIKW(729-732)	2.99626
small nuclear ribonucleoprotein Sm D2, putative	PBANKA_0315200	11.799	no	2.99603
mRNA-binding protein PUF1	PBANKA_1233500	137.25	KRIAW(928-932)	2.92511
membrane protein ICM1	PBANKA_1446100	206.38	RTITW(31-35) KFVSF(125-129) KSIWF(540-544) KGIRF (821-825) KAVFF(881-885) KGVAF(954-958)	2.91333
STAG domain-containing protein, putative	PBANKA_1320200	267.48	RKIRF(502-506)	2.89221
DNA helicase, putative	PBANKA_0712100	120.76	KKIIF(337-341)	2.88208
structural maintenance of chromosomes protein 3, putative	PBANKA_0716000	139.07	KTILF(614-618)	2.81789
allantoicase, putative	PBANKA_1304400	56.085	KVLF(99-102) KINF(272-275) KKIDW(414-418)	2.806
small nuclear ribonucleoprotein G, putative	PBANKA_0708400	9.45	no	2.73271
DNA polymerase alpha catalytic subunit A, putative	PBANKA_0613200	198.94	KIVF(435-438) KYINF(614-618) KGINF(1193-1197) RIIF(1215-1218) KPVIF(1439-1443)	2.7278
DNA-directed RNA polymerase II subunit RPB11, putative	PBANKA_1403400	14.206	KVTF(60-63)	2.71668
HECT-type E3 ubiquitin ligase UT, putative	PBANKA_0802300	405.31	KKIFF(343-347) KISF(917-920) KIFF(1030-1033) KILF(2308-2311)	2.68323
structural maintenance of chromosomes protein 1, putative	PBANKA_0917500	192.45	no	2.68105
peptidase, putative	PBANKA_1450400	224.21	KIIGF(307-311) KHIDW(616-620) KICF(656-659) KIFF(1397-1400)	2.64616
dicarboxylate/tricarboxylate carrier, putative	PBANKA_0706700	35.631	no	2.62299
[truncated: 373 more rows]

## Sheet: 4. Common PP1 interactome
Table S1. Sheet 4. Common Identified Proteins (CIP) in PbPP1c interactomes in schizonts and gametocytes stages The table shows the protein name (updated using PlasmoDB relapse 54, sept 2021), accession number, molecular weight of identified proteins, RVXF motif and the Student's T-test value. The 157 proteins detected in PbPP1c interactome in schizonts and gametocytes stages are highlighted in pa…
[truncated: 159 more rows]

[truncated: 2 more sheets: 5. I2 interactome in schizonts, 6. I2 interactome gametocytes]
