# Supplementary material for: Mapping PP1c and Its Inhibitor 2 Interactomes Reveals Conserved and Specific Networks in Asexual and Sexual Stages of Plasmodium
Source: Int J Mol Sci. 2022 Jan 19;23(3):1069. doi: 10.3390/ijms23031069 (PMC8835298; doi:10.3390/ijms23031069)
Supplement: Supplementary file 1 [file ijms-23-01069-s001.zip › Supp Table S2_analyse interactome PP1 GO analysis.xlsx]

## Sheet: Schizonts
Table S2. Sheet 1. Analysis of biological processes enrichment in PbPP1c interactome in schizonts. 37 GO Term were found significantly enriched. Hyperlinks to Geneontology description of each GO ID and to PlasmoDB list of genes significantly enriched for each GO ID are active in columns 1 and 4 respectively.
GO ID	GO Term	Genes in the backgroud with this term	Genes in PP1 interactome in schizonts with this term	Percent of background genes in PP1 interactome in schizonts	Fold enrichment	Odds ratio	P-value	Benjamini False Discovery Rate	Bonferroni adjusted p-value
GO:0000387	spliceosomal snRNP assembly	9	6	66.7	11.72	34.11	2.30e-6	2.72e-5	8.97e-4
GO:0001732	formation of cytoplasmic translation initiation complex	10	5	50.0	8.79	16.96	1.13e-4	1.19e-3	4.42e-2
GO:0002181	cytoplasmic translation	16	7	43.8	7.69	13.31	1.29e-5	1.43e-4	5.02e-3
GO:0022618	ribonucleoprotein complex assembly	43	13	30.2	5.31	7.60	3.61e-7	4.86e-6	1.41e-4
GO:0071826	ribonucleoprotein complex subunit organization	43	13	30.2	5.31	7.60	3.61e-7	4.86e-6	1.41e-4
GO:0006412	translation	233	57	24.5	4.30	7.03	2.10e-23	3.45e-21	8.18e-21
GO:0043043	peptide biosynthetic process	234	57	24.4	4.28	6.99	2.65e-23	3.45e-21	1.03e-20
GO:0006518	peptide metabolic process	241	58	24.1	4.23	6.91	1.93e-23	3.45e-21	7.53e-21
GO:0043604	amide biosynthetic process	238	57	23.9	4.21	6.82	6.70e-23	6.53e-21	2.61e-20
GO:0034622	cellular protein-containing complex assembly	76	18	23.7	4.16	5.54	1.25e-7	2.12e-6	4.87e-5
GO:0043603	cellular amide metabolic process	251	58	23.1	4.06	6.53	1.82e-22	1.42e-20	7.09e-20
GO:0065003	protein-containing complex assembly	80	18	22.5	3.95	5.18	2.88e-7	4.33e-6	1.13e-4
GO:0043933	protein-containing complex subunit organization	93	19	20.4	3.59	4.58	6.65e-7	8.36e-6	2.59e-4
GO:0022613	ribonucleoprotein complex biogenesis	117	23	19.7	3.45	4.44	8.69e-8	1.54e-6	3.39e-5
GO:0022607	cellular component assembly	108	20	18.5	3.25	4.06	1.74e-6	2.12e-5	6.79e-4
GO:0034645	cellular macromolecule biosynthetic process	378	69	18.3	3.21	5.05	1.26e-20	8.17e-19	4.90e-18
GO:0009059	macromolecule biosynthetic process	380	69	18.2	3.19	5.02	1.73e-20	9.61e-19	6.73e-18
GO:1901566	organonitrogen compound biosynthetic process	347	59	17.0	2.99	4.35	6.83e-16	2.66e-14	2.66e-13
GO:0044271	cellular nitrogen compound biosynthetic process	377	63	16.7	2.94	4.34	1.21e-16	5.26e-15	4.73e-14
GO:0044085	cellular component biogenesis	180	29	16.1	2.83	3.54	1.66e-7	2.70e-6	6.47e-5
GO:0010467	gene expression	527	79	15.0	2.63	4.11	2.69e-18	1.31e-16	1.05e-15
GO:0044249	cellular biosynthetic process	516	71	13.8	2.42	3.50	3.64e-14	1.29e-12	1.42e-11
GO:1901576	organic substance biosynthetic process	522	71	13.6	2.39	3.45	6.76e-14	2.20e-12	2.64e-11
GO:0009058	biosynthetic process	531	71	13.4	2.35	3.37	1.68e-13	5.04e-12	6.55e-11
GO:0044267	cellular protein metabolic process	515	65	12.6	2.22	3.03	4.29e-11	1.05e-9	1.67e-8
GO:0019538	protein metabolic process	576	68	11.8	2.07	2.81	2.89e-10	5.93e-9	1.13e-7
GO:0034641	cellular nitrogen compound metabolic process	756	87	11.5	2.02	2.99	7.09e-13	1.97e-11	2.76e-10
GO:0071840	cellular component organization or biogenesis	291	33	11.3	1.99	2.33	6.79e-5	7.35e-4	2.65e-2
GO:0044260	cellular macromolecule metabolic process	720	79	11.0	1.93	2.69	2.09e-10	4.54e-9	8.17e-8
GO:1901564	organonitrogen compound metabolic process	701	72	10.3	1.81	2.38	4.28e-8	7.96e-7	1.67e-5
GO:0043170	macromolecule metabolic process	976	98	10.0	1.76	2.61	6.04e-11	1.39e-9	2.36e-8
GO:0006807	nitrogen compound metabolic process	1107	100	9.0	1.59	2.25	2.12e-8	4.13e-7	8.25e-6
GO:0044238	primary metabolic process	1150	100	8.7	1.53	2.12	1.84e-7	2.87e-6	7.17e-5
GO:0009987	cellular process	1639	139	8.5	1.49	2.63	3.55e-11	9.23e-10	1.38e-8
GO:0071704	organic substance metabolic process	1212	103	8.5	1.49	2.07	3.51e-7	4.86e-6	1.37e-4
GO:0044237	cellular metabolic process	1176	100	8.5	1.49	2.05	6.21e-7	8.08e-6	2.42e-4
GO:0008152	metabolic process	1315	105	8.0	1.40	1.89	7.08e-6	8.12e-5	2.76e-3

## Sheet: Gametocytes
Table S2. Sheet 2. Analysis of biological processes enrichment in PbPP1c interactome in gametocytes. 28 GO Term were found significantly enriched. Hyperlinks to Geneontology description of each GO ID and to PlasmoDB list of genes significantly enriched for each GO ID are active in columns 1 and 4 respectively.
GO ID	GO Term	Genes in the backgroud with this term	Genes in PP1 interactome in gametocytes with this term	Percent of background genes in PP1 interactome in gametocytes	Fold enrichment	Odds ratio	P-value	Benjamini False Discovery Rate	Bonferroni adjusted p-value
GO:0000387	spliceosomal snRNP assembly	9	6	66.7	6.87	18.92	5.22e-5	1.27e-3	3.43e-2
GO:0007018	microtubule-based movement	22	13	59.1	6.09	13.92	1.21e-8	2.65e-6	7.94e-6
GO:0007017	microtubule-based process	45	21	46.7	4.81	8.59	1.28e-10	4.20e-8	8.40e-8
GO:0006928	movement of cell or subcellular component	43	17	39.5	4.07	6.34	1.63e-7	2.14e-5	1.07e-4
GO:0006260	DNA replication	54	20	37.0	3.82	5.74	4.73e-8	7.75e-6	3.10e-5
GO:0022618	ribonucleoprotein complex assembly	43	14	32.6	3.36	4.64	2.89e-5	1.08e-3	1.90e-2
GO:0071826	ribonucleoprotein complex subunit organization	43	14	32.6	3.36	4.64	2.89e-5	1.08e-3	1.90e-2
GO:0019941	modification-dependent protein catabolic process	44	14	31.8	3.28	4.48	3.88e-5	1.08e-3	2.54e-2
GO:0006511	ubiquitin-dependent protein catabolic process	44	14	31.8	3.28	4.48	3.88e-5	1.08e-3	2.54e-2
GO:0043632	modification-dependent macromolecule catabolic process	44	14	31.8	3.28	4.48	3.88e-5	1.08e-3	2.54e-2
GO:0034622	cellular protein-containing complex assembly	76	22	28.9	2.98	3.98	1.44e-6	1.35e-4	9.46e-4
GO:0065003	protein-containing complex assembly	80	22	27.5	2.83	3.70	3.72e-6	2.44e-4	2.44e-3
GO:1901565	organonitrogen compound catabolic process	68	18	26.5	2.73	3.48	5.09e-5	1.27e-3	3.34e-2
GO:0022607	cellular component assembly	108	27	25.0	2.58	3.28	2.23e-6	1.83e-4	1.46e-3
GO:0043933	protein-containing complex subunit organization	93	23	24.7	2.55	3.20	1.56e-5	6.84e-4	1.03e-2
GO:0051649	establishment of localization in cell	99	24	24.2	2.50	3.12	1.47e-5	6.84e-4	9.63e-3
GO:0046907	intracellular transport	98	23	23.5	2.42	2.98	3.89e-5	1.08e-3	2.55e-2
GO:0051641	cellular localization	111	26	23.4	2.41	2.99	1.25e-5	6.31e-4	8.20e-3
GO:0042886	amide transport	110	25	22.7	2.34	2.87	3.21e-5	1.08e-3	2.11e-2
GO:0045184	establishment of protein localization	111	25	22.5	2.32	2.84	3.78e-5	1.08e-3	2.48e-2
GO:0015031	protein transport	112	25	22.3	2.30	2.80	4.44e-5	1.16e-3	2.91e-2
GO:0071705	nitrogen compound transport	118	26	22.0	2.27	2.76	3.96e-5	1.08e-3	2.60e-2
GO:0008104	protein localization	115	25	21.7	2.24	2.71	7.08e-5	1.66e-3	4.65e-2
GO:0016043	cellular component organization	220	44	20.0	2.06	2.52	1.31e-6	1.35e-4	8.57e-4
GO:0034645	cellular macromolecule biosynthetic process	378	63	16.7	1.72	2.05	4.96e-6	2.96e-4	3.25e-3
GO:0009059	macromolecule biosynthetic process	380	63	16.6	1.71	2.03	5.95e-6	3.26e-4	3.91e-3
GO:0044260	cellular macromolecule metabolic process	720	104	14.4	1.49	1.81	2.92e-6	2.13e-4	1.92e-3
GO:0009987	cellular process	1639	216	13.2	1.36	2.06	1.10e-10	4.20e-8	7.24e-8

## Sheet: Common schizonts-gametocytes
Table S2. Sheet 3. Analysis of biological processes enrichment in common genes in PbPP1c interactome in schizonts and gametocytes. 44 GO Term were found significantly enriched. Hyperlinks to Geneontology description of each GO ID and to PlasmoDB list of genes significantly enriched for each GO ID are active in columns 1 and 4 respectively.
GO ID	GO Term	Genes in the backgroud with this term	Common genes in PP1 interactome in schizonts and gametocytes with this term	Percent of background genes in PP1 interactome in schizonts	Fold enrichment	Odds ratio	P-value	Benjamini False Discovery Rate	Bonferroni adjusted p-value
GO:0000387	spliceosomal snRNP assembly	9	6	66.7	16.73	50.22	2.76e-7	4.76e-6	1.00e-4
GO:0070682	proteasome regulatory particle assembly	7	4	57.1	14.34	33.00	7.72e-5	7.01e-4	2.80e-2
GO:0001732	formation of cytoplasmic translation initiation complex	10	5	50.0	12.54	24.91	2.01e-5	2.52e-4	7.31e-3
GO:0002183	cytoplasmic translational initiation	12	5	41.7	10.45	17.79	5.93e-5	5.71e-4	2.15e-2
GO:0022618	ribonucleoprotein complex assembly	43	12	27.9	7.00	10.08	5.40e-8	1.40e-6	1.96e-5
GO:0071826	ribonucleoprotein complex subunit organization	43	12	27.9	7.00	10.08	5.40e-8	1.40e-6	1.96e-5
GO:0034622	cellular protein-containing complex assembly	76	17	22.4	5.61	7.73	3.23e-9	1.47e-7	1.17e-6
GO:0065003	protein-containing complex assembly	80	17	21.3	5.33	7.23	7.49e-9	2.72e-7	2.72e-6
GO:0043933	protein-containing complex subunit organization	93	18	19.4	4.86	6.46	1.27e-8	4.20e-7	4.62e-6
GO:0022607	cellular component assembly	108	18	16.7	4.18	5.36	1.45e-7	2.78e-6	5.28e-5
GO:0000398	mRNA splicing, via spliceosome	68	11	16.2	4.06	4.95	5.98e-5	5.71e-4	2.17e-2
GO:0000377	RNA splicing, via transesterification reactions with bulged adenosine as nucleophile	68	11	16.2	4.06	4.95	5.98e-5	5.71e-4	2.17e-2
GO:0000375	RNA splicing, via transesterification reactions	68	11	16.2	4.06	4.95	5.98e-5	5.71e-4	2.17e-2
GO:0008380	RNA splicing	86	12	14.0	3.50	4.17	1.22e-4	1.01e-3	4.44e-2
GO:0022613	ribonucleoprotein complex biogenesis	117	16	13.7	3.43	4.17	1.12e-5	1.50e-4	4.06e-3
GO:0006412	translation	233	31	13.3	3.34	4.43	8.72e-10	8.82e-8	3.16e-7
GO:0046907	intracellular transport	98	13	13.3	3.33	3.95	1.08e-4	9.55e-4	3.92e-2
GO:0043043	peptide biosynthetic process	234	31	13.2	3.32	4.41	9.72e-10	8.82e-8	3.53e-7
GO:0051649	establishment of localization in cell	99	13	13.1	3.29	3.90	1.20e-4	1.01e-3	4.36e-2
GO:0043604	amide biosynthetic process	238	31	13.0	3.27	4.32	1.50e-9	1.07e-7	5.43e-7
GO:0006518	peptide metabolic process	241	31	12.9	3.23	4.25	2.06e-9	1.07e-7	7.46e-7
GO:0015031	protein transport	112	14	12.5	3.14	3.70	1.12e-4	9.72e-4	4.08e-2
GO:0043603	cellular amide metabolic process	251	31	12.4	3.10	4.05	5.68e-9	2.29e-7	2.06e-6
GO:0044085	cellular component biogenesis	180	22	12.2	3.07	3.78	1.55e-6	2.25e-5	5.62e-4
GO:0034645	cellular macromolecule biosynthetic process	378	43	11.4	2.85	3.97	4.06e-11	8.82e-9	1.47e-8
GO:0009059	macromolecule biosynthetic process	380	43	11.3	2.84	3.95	4.86e-11	8.82e-9	1.76e-8
GO:0016043	cellular component organization	220	22	10.0	2.51	2.98	4.19e-5	4.61e-4	1.52e-2
GO:0044271	cellular nitrogen compound biosynthetic process	377	37	9.8	2.46	3.18	8.59e-8	1.95e-6	3.12e-5
GO:1901566	organonitrogen compound biosynthetic process	347	33	9.5	2.39	2.98	1.09e-6	1.71e-5	3.94e-4
GO:0010467	gene expression	527	49	9.3	2.33	3.22	1.83e-9	1.07e-7	6.63e-7
GO:0071840	cellular component organization or biogenesis	291	26	8.9	2.24	2.66	5.68e-5	5.71e-4	2.06e-2
GO:0044249	cellular biosynthetic process	516	45	8.7	2.19	2.89	8.52e-8	1.95e-6	3.09e-5
GO:1901576	organic substance biosynthetic process	522	45	8.6	2.16	2.85	1.21e-7	2.45e-6	4.41e-5
GO:0009058	biosynthetic process	531	45	8.5	2.13	2.78	2.04e-7	3.71e-6	7.42e-5
GO:0044267	cellular protein metabolic process	515	39	7.6	1.90	2.33	2.91e-5	3.41e-4	1.06e-2
GO:0034641	cellular nitrogen compound metabolic process	756	56	7.4	1.86	2.51	3.90e-7	6.44e-6	1.42e-4
GO:0044260	cellular macromolecule metabolic process	720	53	7.4	1.85	2.44	1.20e-6	1.82e-5	4.37e-4
GO:0019538	protein metabolic process	576	42	7.3	1.83	2.26	3.28e-5	3.72e-4	1.19e-2
GO:0043170	macromolecule metabolic process	976	68	7.0	1.75	2.51	1.01e-7	2.15e-6	3.65e-5
GO:0006807	nitrogen compound metabolic process	1107	69	6.2	1.56	2.15	7.18e-6	1.00e-4	2.61e-3
GO:0044238	primary metabolic process	1150	70	6.1	1.53	2.09	1.44e-5	1.86e-4	5.21e-3
GO:0009987	cellular process	1639	98	6.0	1.50	2.64	2.00e-8	6.05e-7	7.26e-6
GO:0071704	organic substance metabolic process	1212	72	5.9	1.49	2.04	2.42e-5	2.93e-4	8.79e-3
GO:0044237	cellular metabolic process	1176	69	5.9	1.47	1.96	6.80e-5	6.33e-4	2.47e-2

## Sheet: Schizonts specific
Table S2. Sheet 4. Analysis of biological processes enrichment in PbPP1c interactome specific for schizont stages. 20 GO Term were found significantly enriched. Hyperlinks to Geneontology description of each GO ID and to PlasmoDB list of genes significantly enriched for each GO ID are active in columns 1 and 4 respectively.
GO ID	GO Term	Genes in the backgroud with this term	Genes in PP1 interactome specific for schizont stages with this term	Percent of background genes in PP1 interactome specific for schizont stages	Fold enrichment	Odds ratio	P-value	Benjamini False Discovery Rate	Bonferroni adjusted p-value
GO:0042273	ribosomal large subunit biogenesis	21	5	23.8	13.97	19.52	2.01e-5	1.42e-4	2.56e-3
GO:0006518	peptide metabolic process	241	27	11.2	6.57	12.12	1.27e-16	1.62e-14	1.62e-14
GO:0006412	translation	233	26	11.2	6.55	11.75	6.45e-16	2.28e-14	8.20e-14
GO:0043043	peptide biosynthetic process	234	26	11.1	6.52	11.69	7.19e-16	2.28e-14	9.13e-14
GO:0043604	amide biosynthetic process	238	26	10.9	6.41	11.46	1.10e-15	2.79e-14	1.40e-13
GO:0043603	cellular amide metabolic process	251	27	10.8	6.31	11.54	3.68e-16	2.28e-14	4.68e-14
GO:1901566	organonitrogen compound biosynthetic process	347	26	7.5	4.40	7.32	1.02e-11	2.15e-10	1.29e-9
GO:0044271	cellular nitrogen compound biosynthetic process	377	26	6.9	4.05	6.64	6.93e-11	1.17e-9	8.80e-9
GO:0034645	cellular macromolecule biosynthetic process	378	26	6.9	4.04	6.61	7.36e-11	1.17e-9	9.35e-9
GO:0009059	macromolecule biosynthetic process	380	26	6.8	4.01	6.57	8.31e-11	1.17e-9	1.06e-8
GO:0010467	gene expression	527	30	5.7	3.34	5.81	1.51e-10	1.91e-9	1.91e-8
GO:0044267	cellular protein metabolic process	515	26	5.0	2.96	4.56	6.63e-8	7.30e-7	8.42e-6
GO:0044249	cellular biosynthetic process	516	26	5.0	2.96	4.55	6.90e-8	7.30e-7	8.77e-6
GO:1901576	organic substance biosynthetic process	522	26	5.0	2.92	4.48	8.79e-8	8.59e-7	1.12e-5
GO:0009058	biosynthetic process	531	26	4.9	2.87	4.39	1.26e-7	1.14e-6	1.59e-5
GO:0019538	protein metabolic process	576	26	4.5	2.65	3.97	6.63e-7	5.27e-6	8.43e-5
GO:0034641	cellular nitrogen compound metabolic process	756	31	4.1	2.41	3.93	2.43e-7	2.05e-6	3.08e-5
GO:1901564	organonitrogen compound metabolic process	701	27	3.9	2.26	3.32	8.86e-6	6.62e-5	1.12e-3
GO:0044260	cellular macromolecule metabolic process	720	26	3.6	2.12	3.00	4.78e-5	3.19e-4	6.06e-3
GO:0043170	macromolecule metabolic process	976	30	3.1	1.80	2.61	2.06e-4	1.31e-3	2.62e-2

## Sheet: Gametocytes specific
Table S2. Sheet 5. Analysis of biological processes enrichment in PbPP1c interactome specific for gametocyte stages. 5 GO Term were found significantly enriched. Hyperlinks to Geneontology description of each GO ID and to PlasmoDB list of genes significantly enriched for each GO ID are active in columns 1 and 4 respectively.
GO ID	GO Term	Genes in the backgroud with this term	Genes in PP1 interactome specific for gametocyte stages with this term	Percent of background genes in PP1 interactome specific for gametocyte stages	Fold enrichment	Odds ratio	P-value	Benjamini False Discovery Rate	Bonferroni adjusted p-value
GO:0007018	microtubule-based movement	22	12	54.5	9.54	20.94	3.49e-10	9.04e-8	1.91e-7
GO:0007017	microtubule-based process	45	18	40.0	7.00	11.94	9.01e-12	4.93e-9	4.93e-9
GO:0006928	movement of cell or subcellular component	43	16	37.2	6.51	10.50	4.96e-10	9.04e-8	2.71e-7
GO:0006260	DNA replication	54	13	24.1	4.21	5.51	6.60e-6	9.03e-4	3.61e-3
GO:1901565	organonitrogen compound catabolic process	68	13	19.1	3.34	4.09	9.14e-5	1.00e-2	5.00e-2
