# Supplementary material for: Mapping PP1c and Its Inhibitor 2 Interactomes Reveals Conserved and Specific Networks in Asexual and Sexual Stages of Plasmodium
Source: Int J Mol Sci. 2022 Jan 19;23(3):1069. doi: 10.3390/ijms23031069 (PMC8835298; doi:10.3390/ijms23031069)
Supplement: Supplementary file 1 [file ijms-23-01069-s001.zip › Supp Table S3_ list of primers.xlsx]

## Sheet: Feuil1
Table S3. List of primers used in this study.
Name	Primer 5’ à 3’	Orientation	Tagged protein/Region amplified	Plasmid	Use
Pr1	CAATATCACGTTAAAATGCAAATG	F	5' UTR PbI2 mCherry		Genotyping
Pr2	TCTTCCACCTCCACCGGATCCTTCTTCTCCATCCTGAGC	R	PbI2 mcherry	pL1886	Knock-in and genotyping
Pr3	AGCTCCACCGCGGTGGCGGCCGCGAACTTTATTAGTGCGCATG	F			Knock-in
Pr4	CTCGCCCTCGATCTCGAACTC	R	mCherry		Genotyping
